# Supplementary material for: Temporal analysis of enhancers during mouse cerebellar development reveals dynamic and novel regulatory functions
Source: eLife. 2022 Aug 9;11:e74207. doi: 10.7554/eLife.74207 (PMC9398453; doi:10.7554/eLife.74207)
Supplement: Supplementary file 2. [file elife-74207-supp2.xlsx]

## Sheet: Early
Early Active Cerebellar Enhancers
chr8:126806954-126811331
chr11:25255729-25258387
chr3:108234822-108238752
chr12:27823040-27826607
chr9:41184205-41186997
chr3:88044122-88047493
chr16:34572066-34574627
chr6:88887125-88893861
chr1:135293899-135295893
chr8:111882761-111885524
chr4:107352013-107354379
chr12:28248828-28253026
chr15:75462731-75466535
chr13:71295962-71299483
chr14:26425811-26428715
chr2:157288077-157291563
chr10:39259718-39262766
chr16:90521132-90523434
chr12:118291644-118293761
chr6:88874287-88878269
chr15:90846240-90850609
chr4:128391900-128395400
chr15:72851007-72853410
chr11:76280471-76283760
chr17:66828167-66830643
chr10:39271003-39273585
chr5:142846914-142848822
chr5:136200409-136202642
chr3:87775031-87778967
chr7:147243357-147244853
chr2:102290136-102291718
chr4:54664405-54666799
chr13:100213322-100218655
chr8:94885374-94889903
chr16:77399404-77401993
chr4:155557647-155561072
chr11:117192864-117195030
chr8:94519178-94521874
chr3:52446895-52449329
chr15:85337522-85338925
chr14:26136033-26139028
chr5:112372493-112374456
chr7:139438289-139440609
chr1:153789596-153792979
chr7:35723443-35726740
chr2:93125485-93129720
chr2:157165427-157169107
chr11:117357350-117360164
chr1:42547790-42549055
chr6:50771284-50774328
chr6:5329265-5334661
chr5:112189828-112192142
chr2:17947421-17954053
chr19:21861356-21865223
chr2:33829298-33831552
chr4:106607513-106614164
chr17:15384539-15386681
chr4:62279634-62281351
chr6:88879012-88881188
chr2:26340736-26345456
chr12:113984608-113986487
chr2:29710581-29713117
chr9:65022302-65024839
chr9:16241111-16246838
chr6:90731524-90734907
chr18:34048369-34052802
chr6:88955770-88960127
chr2:38439349-38441512
chr18:75661502-75663765
chr12:113567200-113569718
chr9:119311301-119313309
chr12:118389042-118399439
chr7:86675142-86682927
chr4:139376963-139378588
chr12:109501319-109505507
chr8:127741385-127743162
chr5:129661290-129663580
chr4:106660207-106662808
chr6:112758017-112762393
chr2:30571795-30581999
chr13:100261894-100264030
chr15:98798274-98802782
chr12:84825940-84828664
chr11:108958856-108960605
chr11:54625331-54627388
chr11:88394853-88403801
chr8:79863350-79865494
chr13:45511213-45515356
chr9:41543616-41544420
chr2:24980402-24983373
chr19:47983488-47985359
chr5:115853737-115855435
chr4:87013877-87016178
chr15:53141576-53144175
chr4:32444765-32446963
chr10:68674792-68676570
chr12:112929772-112934961
chr13:47070331-47071949
chr11:117339553-117341393
chr11:117488307-117490373
chr10:79652633-79654074
chr1:153923254-153925075
chr13:60247215-60249574
chr13:43624875-43627942
chr16:87699400-87700601
chr4:155562491-155564059
chr14:25927023-25929276
chr7:147245564-147248266
chr6:88925972-88933390
chr4:136375508-136377117
chr7:29854751-29857215
chr6:127286342-127288100
chr11:59988822-59991585
chr8:72642880-72643416
chr7:71101049-71103509
chr5:150297910-150300351
chr12:29500906-29504190
chr2:180492596-180494663
chr19:41762401-41764664
chr15:102185562-102187017
chr13:34339635-34342390
chr3:38466325-38468614
chr14:25645141-25648955
chr8:12871022-12872620
chr5:112642291-112647071
chr2:151872560-151877733
chr11:113646908-113647578
chr11:120084803-120087163
chr2:93130898-93132408
chr3:89027488-89031878
chr1:134217740-134220594
chr6:91662073-91664142
chr8:119780140-119785344
chr14:26403046-26407939
chr13:108744373-108746716
chr2:50994339-50998046
chr18:13895832-13898757
chr2:153269036-153271976
chr10:66465372-66467754
chr4:117947666-117950432
chr7:74858796-74859480
chr10:20004604-20006974
chr12:45502025-45506328
chr3:8865357-8867321
chr11:117267831-117271928
chr14:106319385-106322809
chr11:24185281-24187650
chr11:116671671-116676432
chr19:26843428-26845939
chr17:46755742-46757044
chr15:103348361-103350929
chr3:153267675-153269893
chr15:85291167-85295407
chr3:103223191-103226030
chr6:127367625-127368835
chr7:30101967-30104126
chr5:22918815-22921998
chr9:96878867-96883581
chr11:88273454-88278441
chr11:31986508-31988278
chr5:64704554-64706994
chr5:140698871-140700452
chr9:72486437-72489192
chr12:16806901-16807913
chr1:78163053-78170877
chr4:115550149-115551704
chr16:44687072-44689815
chr10:17350933-17352593
chr4:123953651-123956511
chr6:54959159-54960549
chr15:98812726-98824480
chr15:100889973-100891030
chr11:44645230-44647590
chr2:73966604-73969704
chr8:111875437-111878067
chr9:63098611-63099571
chr4:125924883-125927108
chr5:139253755-139255736
chr3:89450526-89452186
chr6:91250997-91252959
chr4:54624596-54626875
chr18:36014258-36016456
chr1:42945121-42947196
chr9:61719366-61721138
chr13:54975577-54976554
chr9:96915839-96920612
chr7:86687321-86690347
chr4:125404417-125407573
chr9:48469843-48472211
chr7:151812786-151815614
chr18:84888761-84892735
chr5:135151178-135152828
chr2:180589394-180590413
chr15:103129670-103132607
chr9:61224911-61226678
chr15:82886062-82887632
chr11:101344654-101347663
chr13:51408965-51411218
chr12:82155143-82157654
chr3:133965583-133967200
chr14:66937854-66939609
chr7:103532024-103533770
chr2:131672653-131674217
chr11:115269337-115272448
chr11:55236981-55238446
chr11:96732830-96739019
chr1:158684271-158685462
chr5:140368083-140370661
chr14:41768943-41770135
chr1:173976870-173980625
chr7:129620809-129622920
chr12:100247532-100250027
chr15:38127926-38130183
chr1:129433176-129435950
chr6:112786691-112793068
chr2:103464729-103467250
chr11:84162038-84163835
chr2:33643269-33646312
chr8:110767695-110771162
chr6:98977910-98978985
chr13:28976102-28977741
chr13:60271272-60273477
chr4:45842460-45844543
chr17:27637917-27639361
chr18:54334034-54336824
chr8:71644793-71647214
chr2:165825778-165827441
chr2:68203682-68206473
chr12:27744891-27751605
chr6:97998153-97999819
chr18:67765281-67766754
chr15:84129393-84130962
chr2:30296806-30298226
chr8:63864547-63867808
chr2:28871807-28872868
chr11:87952425-87954050
chr11:77576733-77577915
chr4:142867915-142871002
chr13:59141608-59142985
chr7:25957344-25960999
chr4:128576124-128577383
chr5:148963670-148965869
chr13:25841722-25843645
chr2:154251426-154253968
chr16:31545907-31547361
chr7:126228716-126230386
chr4:107500858-107504142
chr11:108781710-108784703
chr1:164761839-164762969
chr6:94722157-94724758
chr8:111756065-111758029
chr5:23849266-23851186
chr1:133867020-133869793
chr1:168212532-168214002
chr7:25934862-25938021
chr4:148264901-148266132
chr5:114320449-114325074
chr18:75849218-75851009
chr14:26197143-26198679
chr12:27834962-27836815
chr6:97478603-97480062
chr14:25660812-25662291
chr2:150475498-150477425
chr1:195814796-195816868
chr4:150132104-150133150
chr8:94515000-94517915
chr13:71243305-71244763
chr17:10526786-10529622
chr2:93119062-93121432
chr5:111937479-111939182
chr18:82665778-82667789
chr5:140739535-140741841
chr5:31020216-31021704
chr12:113570808-113573523
chr3:138516861-138518466
chr8:129349663-129351001
chr5:104201326-104202734
chr18:84540604-84544357
chr5:117018849-117025052
chr5:36257586-36264634
chr16:37989381-37991991
chr19:46115770-46117845
chr1:138129567-138131295
chr13:98565846-98570076
chr2:170043837-170047057
chr9:26961536-26963005
chr5:141059268-141060905
chr16:35587295-35589452
chr4:41630349-41634162
chr7:73374914-73376153
chr11:98232272-98233664
chr8:48347525-48349522
chr13:28809607-28811149
chr17:26639286-26641784
chr1:154661581-154665555
chr8:122858289-122860867
chr10:84172802-84174919
chr4:129386002-129387969
chr4:62334785-62336451
chr18:76628198-76630186
chr2:91771608-91771847
chr4:100336983-100338780
chr2:156545980-156548070
chr1:41946937-41949502
chr10:79265335-79267628
chr2:164960844-164962734
chr4:130149322-130156929
chr2:101818082-101820137
chr4:155437629-155438779
chr19:47566008-47568986
chr17:88724848-88726542
chr9:120600103-120602099
chr6:51606270-51609279
chr2:29675384-29676604
chr16:35163399-35165741
chr11:88087172-88090828
chr2:26330465-26332452
chr13:55571615-55574593
chr6:120421264-120424590
chr4:43888175-43888689
chr2:50768738-50770699
chr8:96588956-96592264
chr11:119505921-119507393
chr9:16304073-16304585
chr12:30382844-30384843
chr9:43551234-43555269
chr19:46574147-46579271
chr11:120077471-120078995
chr14:25597717-25599662
chr5:36775858-36778331
chr5:112271734-112274391
chr10:86497601-86500577
chr2:33960759-33964393
chr13:47368455-47369881
chr5:113735299-113737162
chr10:59665108-59666594
chr4:32161264-32162747
chr15:66069835-66073136
chr4:153572008-153573243
chr1:92104590-92106594
chr8:127859524-127860791
chr2:152549117-152550570
chr18:25835741-25838878
chr9:96856780-96859270
chr2:4462926-4465897
chr7:126038268-126040485
chr4:148410110-148411221
chr13:29461974-29464195
chr4:8837259-8839594
chr2:157323345-157324949
chr11:88121642-88125336
chr5:93334094-93335403
chr17:47276374-47279095
chr5:112183318-112185004
chr8:93263655-93265924
chr5:125724129-125726920
chr9:63868052-63870596
chr13:98204976-98207069
chr4:140603824-140606026
chr2:180854802-180857406
chr1:135957208-135962967
chr11:88293965-88297491
chr17:66792875-66796740
chr8:8487022-8490617
chr5:24206142-24207245
chr11:96760518-96762594
chr2:27269052-27270636
chr9:103019287-103020665
chr19:58534729-58535924
chr12:99811458-99813897
chr12:109217852-109219577
chr8:111834346-111836978
chr11:62442436-62444954
chr3:88004048-88013970
chr13:98019522-98022807
chr5:127804254-127805160
chr1:134267471-134270248
chr5:120751641-120752882
chr9:57958597-57962668
chr1:167211214-167212951
chr9:43737163-43738403
chr18:80303217-80304604
chr3:35301795-35305506
chr19:55217942-55220124
chr5:127714776-127715641
chr17:46609688-46611513
chr6:112921457-112924739
chr10:118890435-118892335
chr2:28380487-28381719
chr5:140272747-140274748
chr12:118285886-118286986
chr11:59953065-59955084
chr14:25834473-25835932
chr4:149770076-149772241
chr1:134214470-134216939
chr12:29780026-29781728
chr11:72389418-72390841
chr5:122431235-122432634
chr4:44245406-44247811
chr4:32564723-32570905
chr6:86007560-86010214
chr16:32515735-32517082
chr2:172998144-173000292
chr6:127666955-127668803
chr13:72952559-72955180
chr2:4373460-4374791
chr2:164958627-164959577
chr13:108329997-108332449
chr14:67111585-67114510
chr12:25809049-25811430
chr9:75108548-75110026
chr18:16871423-16872884
chr11:108929340-108932924
chr17:7064450-7066942
chr15:75906834-75908989
chr2:157800410-157801719
chr1:170216307-170222385
chr15:79586363-79587364
chr4:139362855-139364801
chr11:120011388-120012593
chr11:24207420-24208552
chr1:134975827-134977674
chr8:122815602-122821176
chr13:43833613-43836961
chr16:31591901-31593780
chr9:41172665-41174786
chr12:118582872-118584766
chr11:118062793-118064999
chr10:92253186-92255435
chr17:29931899-29932701
chr6:95152139-95153544
chr10:43246986-43248198
chr2:116800654-116803123
chr17:88012134-88013264
chr15:96226116-96227665
chr11:24639561-24641434
chr12:80908300-80909497
chr12:27765803-27770663
chr4:141457452-141458953
chr11:116190367-116191810
chr4:87676941-87679733
chr10:39290282-39293187
chr4:126903500-126906359
chr4:136327878-136329816
chr18:34720611-34721865
chr11:117329699-117331676
chr6:88494729-88495795
chr2:17960630-17965398
chr2:27210191-27211855
chr13:29506320-29509300
chr12:81162083-81165518
chr4:114751723-114752888
chr5:28199550-28201316
chr4:154547090-154549017
chr4:148258395-148261416
chr12:109558226-109559955
chr9:65003854-65005628
chr9:106240255-106241964
chr11:77928040-77929802
chr11:18781226-18784538
chr8:94089568-94091311
chr9:71726039-71728536
chr13:60027491-60030191
chr2:109517125-109518606
chr18:77247079-77249098
chr11:78908928-78909839
chr7:80543503-80545871
chr19:55863012-55863777
chr18:66443134-66444619
chr5:99907469-99909600
chr13:78565855-78568012
chr12:41516453-41518122
chr9:107609148-107610894
chr2:93019849-93021685
chr2:165141597-165143456
chr5:35291413-35293555
chr13:108453513-108454707
chr2:102526057-102526990
chr5:48376519-48377958
chr15:75970303-75971692
chr7:146325408-146326830
chr7:78527941-78530080
chr13:28873459-28875102
chr9:101374281-101375587
chr18:29457651-29458944
chr1:90464921-90466184
chr11:88064940-88068065
chr1:81589640-81591957
chr5:112023958-112025787
chr13:114668806-114671686
chr1:38617919-38620347
chr2:154401958-154404290
chr10:39306070-39309238
chr9:64999896-65002113
chr11:108966382-108969760
chr8:94657224-94658595
chr7:126134753-126138622
chr4:32616499-32620451
chr1:185345049-185346802
chr2:29708226-29709926
chr2:93731202-93732474
chr11:88363448-88367651
chr1:92871199-92874012
chr10:70411840-70413308
chr18:38539313-38540437
chr5:112088857-112090584
chr18:14054970-14057436
chr5:118724122-118725254
chr15:100896746-100900740
chr5:24110153-24112397
chr14:80537914-80539724
chr13:36674071-36676305
chr7:87220192-87221732
chr5:119084849-119086525
chr4:54040568-54043397
chr14:103928784-103929702
chr8:94328116-94330540
chr4:32411501-32415327
chr5:28443568-28445886
chr6:112777638-112780260
chr11:86632521-86633760
chr13:59111837-59113494
chr4:150501465-150504035
chr14:30255401-30256417
chr10:119127519-119130195
chr4:106756389-106758112
chr1:99944290-99946267
chr16:35464236-35465404
chr13:56322411-56323702
chr4:44259567-44261080
chr12:107412257-107414254
chr6:93798342-93800809
chr5:129723605-129724923
chr7:35479422-35481380
chr1:123073471-123076944
chr11:87931517-87934003
chr12:103936166-103937141
chr11:107639588-107641400
chr4:135695494-135697451
chr10:84147965-84150070
chr12:118495201-118496858
chr4:104841248-104844233
chr13:98593528-98596601
chr4:140890631-140892280
chr12:12729682-12731112
chr12:101551581-101553132
chr11:119374692-119377735
chr10:86951442-86953448
chr19:41155981-41156967
chr17:48915487-48916425
chr1:156929196-156931499
chr12:113901487-113904949
chr6:89241124-89242253
chr13:72425173-72427116
chr11:35740483-35742104
chr5:122743892-122745321
chr18:37984130-37986355
chr11:43388296-43389715
chr5:103764615-103766900
chr8:92824519-92827755
chr7:35654886-35655586
chr2:91239378-91240717
chr1:94293973-94294961
chr7:143080543-143081364
chr4:135689794-135692492
chr10:7756977-7758545
chr11:98608160-98613227
chr12:99799526-99803792
chr5:27317619-27319175
chr5:112430857-112431946
chr14:123381729-123383208
chr19:7214558-7216117
chr7:87201666-87203119
chr9:65025656-65027565
chr3:97030664-97032266
chr3:105308236-105309362
chr2:29348306-29350173
chr9:43687346-43688856
chr2:29475288-29476274
chr4:111115627-111117630
chr6:127836675-127838663
chr14:68168605-68170963
chr18:16196219-16197425
chr14:26216194-26217779
chr15:38025489-38026949
chr19:33123155-33124431
chr2:91302596-91303641
chr12:29732687-29734840
chr9:107636705-107639830
chr15:90829927-90831987
chr13:108853558-108854973
chr15:99477911-99480142
chr4:140829461-140831220
chr2:115844912-115846655
chr15:95261206-95263513
chr8:90354803-90358738
chr14:64851633-64853274
chr10:82447995-82449171
chr1:42299448-42301444
chr7:25963289-25965751
chr12:114270542-114271539
chr11:84398509-84401204
chr3:105371263-105373731
chr10:5957673-5960105
chr4:137274868-137275879
chr8:129362773-129364124
chr17:89336191-89338306
chr18:65857102-65858588
chr11:76263057-76264079
chr1:155488420-155489876
chr2:161164455-161165800
chr2:33731793-33732991
chr9:35138309-35139697
chr1:195275508-195276653
chr10:59419923-59421944
chr9:60113831-60115471
chr7:137863173-137864341
chr11:97672659-97674906
chr18:83078927-83084710
chr14:25462893-25464145
chr11:20554687-20557558
chr9:96911442-96914421
chr18:72181740-72183940
chr2:33741672-33743397
chr11:101556728-101558224
chr12:30041282-30043016
chr9:27114675-27116761
chr5:107253881-107255298
chr8:12481384-12482595
chr5:122398228-122399416
chr18:5159172-5161122
chr16:18379390-18382649
chr9:36688718-36690629
chr2:152495261-152496777
chr7:52471352-52472500
chr9:96737188-96739918
chr12:82209330-82211511
chr13:52012245-52017169
chr14:76653947-76656418
chr16:35579981-35582023
chr15:86682626-86683485
chr13:73297064-73297826
chr11:88260596-88262253
chr16:17949205-17950467
chr8:36667882-36671666
chr7:135815321-135816896
chr6:84533598-84536648
chr11:71311084-71312631
chr11:44839937-44841092
chr10:60194393-60195795
chr9:102446105-102448498
chr5:125631004-125633158
chr19:47993240-47994413
chr1:120929894-120931307
chr11:102157004-102157873
chr10:69581942-69584162
chr10:79847866-79849753
chr10:12833964-12835580
chr17:15344551-15345815
chr11:67958100-67960172
chr9:120970833-120972362
chr1:134478145-134479895
chr1:161343064-161344455
chr3:51592362-51594219
chr13:28506623-28511128
chr15:101632484-101634847
chr14:25318916-25320752
chr11:114100259-114101660
chr7:30092591-30094364
chr6:86000859-86004014
chr5:111861370-111864489
chr5:113931396-113934696
chr13:110808810-110810493
chr16:91962201-91964877
chr11:114457893-114459618
chr15:73992189-73993334
chr4:119924892-119926701
chr14:64664855-64665818
chr2:169122888-169124192
chr11:77709611-77712014
chr8:96441091-96442904
chr2:33071100-33072554
chr10:24126889-24128368
chr14:79602593-79604251
chr1:38621622-38623972
chr11:94289667-94291151
chr3:108212305-108215712
chr18:36007400-36010876
chr4:140576440-140577726
chr10:82482241-82483069
chr13:73443053-73444849
chr7:56249281-56252706
chr8:93385167-93386765
chr11:19454374-19455719
chr12:110143502-110145188
chr9:35179297-35181126
chr9:65062416-65063611
chr15:75477718-75479329
chr17:68046650-68048543
chr12:80979871-80981281
chr16:33583649-33585699
chr7:150614039-150615102
chr11:65600978-65601805
chr17:25930841-25931879
chr19:5071366-5072297
chr7:88480298-88481328
chr10:17050474-17053743
chr17:10937643-10938396
chr14:77776734-77778756
chr12:88164406-88165867
chr2:157307829-157309068
chr6:21801454-21802421
chr1:167744211-167745608
chr2:20930551-20933906
chr6:90652541-90655332
chr19:47375804-47377396
chr14:96917144-96918694
chr11:103701905-103703619
chr1:170285153-170289868
chr9:41418489-41422254
chr15:101050480-101053302
chr18:54919504-54921387
chr11:75385811-75386960
chr1:64040525-64041824
chr18:34090827-34094013
chr1:75439386-75442875
chr11:71569282-71573703
chr12:30348099-30351276
chr5:112152960-112154768
chr13:43598539-43599477
chr9:46196820-46198298
chr13:44934352-44938966
chr6:51562083-51564551
chr11:113927898-113930239
chr12:110987435-110989025
chr6:51541594-51543988
chr9:43671365-43672418
chr17:45872861-45874339
chr1:184848557-184850018
chr5:111647670-111651224
chr4:32517064-32520406
chr6:36852403-36853899
chr5:142653816-142656048
chr14:67859554-67861696
chr9:96956189-96957456
chr11:84584176-84585264
chr11:88224444-88226761
chr1:174191232-174192110
chr3:146843646-146846203
chr2:27267187-27268416
chr9:59010677-59012141
chr4:124292371-124294680
chr10:62149744-62150646
chr11:24270413-24271286
chr15:89085342-89086504
chr5:132077505-132078916
chr18:25724256-25726283
chr1:173944682-173948259
chr2:174742487-174744144
chr4:13677453-13679904
chr17:48013885-48015832
chr12:55387755-55389637
chr17:29867255-29869103
chr14:21043206-21045601
chr11:80435283-80437118
chr9:61126278-61127375
chr11:115640261-115642513
chr9:69560627-69562372
chr8:14381749-14383337
chr2:19351755-19354155
chr11:77777957-77779394
chr6:120554314-120555408
chr2:180778055-180779352
chr8:14548620-14550639
chr4:109824223-109826239
chr14:80360293-80361994
chr8:90359413-90362312
chr6:127398975-127400582
chr19:58134115-58135978
chr6:28732071-28734086
chr2:150482145-150483680
chr5:36266786-36270425
chr5:132106547-132107507
chr2:163015289-163016633
chr5:132118613-132120040
chr10:6482057-6483585
chr14:13020827-13023838
chr16:34560117-34563573
chr18:10340627-10345472
chr1:72332407-72334229
chr7:35583730-35585740
chr11:80125784-80126939
chr4:9111505-9112854
chr4:95350933-95352421
chr13:60072033-60073656
chr12:88155557-88158430
chr3:83782451-83786075
chr2:153436430-153437174
chr14:27863192-27864677
chr12:113898638-113900755
chr4:140861611-140862671
chr10:122323059-122325398
chr7:81384832-81386279
chr17:30330428-30332844
chr17:83526561-83529580
chr16:38673014-38674677
chr8:93399963-93402007
chr5:122503191-122504391
chr11:115674427-115674954
chr7:4504119-4505156
chr4:33002593-33004094
chr2:170070939-170072132
chr2:33471405-33472720
chr2:168685654-168687130
chr5:111957973-111958942
chr11:103634658-103636080
chr4:57904442-57906298
chr12:109660884-109662001
chr15:85806199-85807142
chr6:88923611-88925138
chr5:67358840-67360913
chr10:66382272-66385021
chr8:123818029-123818986
chr13:34905933-34908011
chr2:163021177-163022136
chr1:77497924-77500029
chr1:155511637-155513085
chr11:114333553-114334860
chr6:39506879-39508918
chr6:100285537-100286273
chr17:66761077-66762291
chr4:106799171-106801627
chr13:114707174-114709182
chr15:78463638-78465437
chr13:98516624-98517959
chr13:54238514-54239984
chr6:112806675-112807692
chr10:42579207-42580732
chr19:7143052-7144973
chr1:122510201-122512159
chr4:33009512-33011326
chr4:150513160-150515744
chr9:59996580-59997541
chr11:25595908-25598305
chr9:48456472-48458384
chr2:37613570-37614372
chr1:39757692-39759507
chr9:79677738-79679464
chr4:104433621-104434578
chr14:26316837-26318268
chr9:107611571-107612718
chr8:127777805-127779483
chr16:77405598-77407285
chr2:179271579-179272898
chr1:42769873-42771466
chr4:135082021-135082980
chr10:122400328-122401798
chr9:102590333-102595366
chr12:99715444-99717554
chr13:70125700-70127687
chr10:59359949-59363473
chr18:55174225-55176938
chr12:113479434-113480578
chr5:132071802-132073052
chr7:146259978-146264483
chr4:124329481-124331019
chr9:78350809-78352693
chr4:154331682-154333099
chr12:81025198-81028226
chr5:36497344-36498665
chr17:29492061-29494494
chr4:136420853-136421681
chr12:73465676-73467846
chr2:29690145-29691879
chr7:143252200-143252886
chr2:165699784-165702891
chr3:84828172-84829998
chr6:97616365-97617738
chr12:27587781-27589434
chr13:108407891-108409845
chr8:10760188-10762056
chr18:38859817-38860757
chr11:84537312-84539960
chr3:95776484-95777982
chr9:46510476-46512497
chr6:36724020-36728536
chr9:24713099-24714286
chr11:116521588-116524924
chr9:65115365-65116072
chr11:94273854-94275634
chr18:37337899-37338273
chr11:113045006-113046291
chr4:120903721-120904717
chr6:116346713-116348791
chr12:87503714-87504703
chr2:30598912-30600321
chr19:46011497-46012891
chr4:62285816-62286848
chr15:85835825-85836858
chr1:173123071-173124284
chr6:78015756-78017246
chr11:88214900-88221127
chr7:143237989-143240011
chr9:64621680-64623305
chr8:8689005-8690530
chr12:55292063-55294006
chr9:63029177-63030549
chr6:72165533-72167447
chr2:17954977-17956222
chr4:45502987-45503870
chr5:132808481-132809810
chr11:98992631-98994007
chr15:98919466-98921483
chr13:73244377-73245579
chr5:142915441-142917371
chr2:74047249-74048837
chr4:106510106-106513628
chr4:41618620-41621112
chr3:38595910-38597914
chr7:79918822-79920444
chr13:49139330-49140043
chr17:10271454-10272376
chr3:153854660-153858064
chr15:67008082-67009029
chr13:100270971-100273544
chr5:129029951-129031205
chr3:88179700-88180961
chr8:120670923-120672552
chr2:13293131-13294447
chr13:105308165-105309453
chr4:153876884-153877781
chr4:149745455-149749074
chr6:30624565-30626009
chr8:96641927-96644072
chr4:117933258-117935444
chr6:54709578-54710843
chr11:76320810-76321978
chr1:167864709-167866042
chr12:88141424-88143886
chr13:54306592-54308825
chr14:98470938-98473325
chr8:11362130-11363264
chr8:26653631-26656065
chr11:101340279-101341485
chr5:145015940-145017926
chr2:44958558-44961255
chr5:112110099-112111471
chr18:55060489-55062567
chr9:15535701-15537245
chr1:135091870-135093929
chr11:88550779-88552188
chr4:124128193-124128863
chr2:33837890-33840155
chr11:54567997-54568910
chr10:58412401-58413479
chr14:68638614-68639600
chr2:30462005-30462897
chr15:82914019-82914817
chr16:4718936-4719335
chr5:37631630-37634292
chr1:134271034-134272504
chr16:30790442-30791859
chr5:114041284-114042578
chr4:128410683-128415973
chr9:108489386-108491426
chr5:35283933-35285514
chr13:110853116-110854139
chr12:88127174-88128858
chr15:72694424-72696178
chr16:21398013-21399407
chr7:86026812-86028917
chr17:32013883-32014936
chr9:57612796-57613929
chr15:80628179-80631611
chr19:14963972-14965894
chr2:92755312-92756715
chr5:36425153-36426432
chr19:10257443-10258618
chr1:134230009-134230882
chr9:63807084-63808645
chr5:30718746-30719907
chr12:110983549-110985170
chr2:29379445-29380608
chr2:28151283-28152089
chr2:50941909-50947079
chr15:102340596-102343306
chr10:90650195-90650751
chr5:106013946-106016286
chr5:117258938-117259982
chr6:142705234-142706440
chr1:88321108-88322366
chr16:37581080-37582840
chr6:38107708-38108793
chr12:27569765-27572932
chr18:55854735-55856292
chr8:93853385-93856171
chr9:107513947-107515393
chr9:79737672-79738890
chr7:78555546-78557163
chr18:80295976-80298800
chr5:112010000-112011134
chr5:112306031-112307186
chr6:112783291-112784436
chr13:15633436-15634898
chr8:125269109-125270499
chr3:54221864-54222728
chr12:85516484-85517620
chr4:124295659-124296226
chr13:51440324-51442338
chr11:46031751-46032942
chr11:107623817-107625399
chr3:87764039-87764970
chr17:73826577-73827928
chr7:74590407-74591313
chr15:102573313-102578448
chr7:143273679-143276290
chr15:97436938-97438508
chr10:79758423-79759466
chr1:170403231-170404437
chr2:38279424-38281074
chr5:34162305-34164734
chr11:45734743-45735518
chr4:45831100-45833641
chr5:3151239-3152733
chr4:142572589-142573849
chr11:112721282-112723077
chr3:90179720-90180835
chr5:111608891-111610470
chr16:78576147-78577240
chr7:126640985-126642265
chr13:51324234-51325272
chr17:29463466-29464189
chr6:72679857-72681220
chr5:117891146-117892060
chr11:96574699-96575648
chr7:79685295-79687598
chr9:115513150-115515325
chr10:110368391-110369359
chr8:122700224-122702016
chr4:141455176-141456628
chr12:29942291-29943369
chr9:99699455-99700758
chr17:63493777-63495830
chr13:34329944-34332189
chr4:129188057-129189512
chr4:23921004-23922073
chr9:63081771-63083646
chr4:122727286-122731611
chr1:88337057-88339770
chr9:46884768-46885682
chr7:139037646-139039018
chr1:159369773-159371191
chr1:139158386-139159582
chr16:72691473-72695195
chr9:20551926-20552803
chr15:84247891-84248999
chr11:89159178-89161142
chr7:80335952-80337769
chr3:138162344-138163940
chr1:92640571-92641294
chr5:103620299-103621510
chr12:5274166-5275690
chr5:129057173-129057695
chr8:97515941-97521393
chr1:135721767-135722780
chr6:99085752-99086774
chr10:120319557-120320630
chr11:59927495-59929517
chr16:23503606-23505640
chr2:151792380-151796978
chr4:32325175-32327292
chr12:111186215-111187354
chr8:123058127-123058850
chr15:85327549-85329429
chr5:53009101-53010375
chr18:68953697-68954865
chr3:86953919-86955874
chr5:115021339-115022147
chr2:101845306-101847068
chr4:108032269-108034092
chr11:25055720-25057683
chr13:8332440-8333924
chr4:43642525-43645169
chr16:43603437-43605077
chr11:116686490-116689329
chr14:122677166-122680809
chr2:38375697-38377653
chr12:113779967-113781294
chr3:38806038-38808092
chr8:90477254-90478013
chr19:57632770-57633867
chr7:139594600-139596792
chr6:89185473-89186747
chr11:117401655-117403222
chr12:82246780-82248144
chr7:71583648-71585748
chr4:148233775-148235022
chr9:107381804-107383867
chr9:121240432-121245070
chr19:28376838-28378954
chr7:118202633-118203320
chr11:114529918-114530986
chr9:40450423-40451415
chr4:5724903-5726138
chr18:64928568-64931496
chr2:93143380-93144636
chr2:119629100-119630686
chr9:22864630-22868022
chr10:44719867-44720783
chr7:86736551-86738668
chr7:16631486-16634133
chr5:150182349-150183773
chr17:31226619-31228411
chr11:57587157-57588174
chr2:101562618-101563562
chr5:36459861-36461316
chr14:52632036-52635256
chr11:32449034-32451074
chr13:71387222-71388704
chr1:20291664-20293718
chr13:51662357-51665852
chr2:70040066-70041359
chr1:139219394-139220620
chr5:142588895-142590237
chr18:65679541-65681341
chr13:72761251-72762782
chr5:127770981-127772047
chr6:116006630-116007929
chr2:92646628-92647881
chr7:116334633-116336228
chr4:139379493-139380374
chr17:25939238-25940781
chr9:62401945-62402937
chr9:71741804-71745846
chr15:77189008-77190230
chr18:67656833-67658829
chr19:30227714-30229152
chr2:91309558-91311111
chr8:90749203-90750231
chr4:148144454-148145909
chr10:67568640-67570408
chr1:77491578-77494428
chr1:135783046-135784223
chr8:86706937-86708366
chr5:118830504-118831638
chr4:47504299-47506123
chr3:145981469-145982313
chr4:129643325-129645535
chr7:145796744-145798893
chr7:106460026-106462473
chr12:118266599-118267861
chr2:6403622-6405567
chr8:111230065-111232305
chr11:68086973-68088615
chr17:15508023-15509970
chr9:40424719-40426090
chr2:157626127-157628026
chr13:15576635-15579622
chr13:34378923-34381622
chr1:91444516-91447941
chr3:101857060-101861517
chr9:27010403-27011969
chr8:123086572-123089756
chr9:49687392-49688270
chr17:49115480-49116477
chr14:33812809-33813813
chr4:62270613-62271889
chr4:139659018-139659996
chr9:66122775-66124104
chr11:84449947-84452173
chr10:95986170-95987480
chr11:86759790-86761533
chr4:32949545-32951291
chr1:35754218-35755187
chr18:38303152-38305028
chr10:91795498-91796899
chr17:14302049-14303359
chr2:25032725-25034767
chr15:82741603-82742439
chr6:88081954-88082614
chr1:136605426-136606306
chr17:87920988-87922536
chr6:99269683-99270726
chr5:117942762-117943545
chr9:46290568-46291532
chr7:56320974-56322177
chr7:144629382-144630549
chr1:154639476-154641352
chr6:127702900-127704134
chr18:54285148-54286201
chr4:41473821-41475538
chr15:72969576-72971340
chr11:119649527-119651437
chr3:122163708-122164857
chr5:66728404-66729204
chr7:4073788-4076011
chr8:90308002-90309639
chr11:35669213-35671441
chr2:101987475-101988443
chr3:154212940-154214362
chr10:94502688-94503611
chr11:80645229-80646276
chr12:85873113-85874104
chr5:120681307-120682793
chr11:80129057-80130399
chr8:94038449-94039610
chr4:133284667-133287768
chr5:132550261-132551197
chr12:109633785-109634889
chr3:127364493-127365693
chr18:54278535-54279989
chr16:37682423-37686382
chr16:89943423-89945492
chr2:158421179-158422195
chr19:10171923-10172506
chr1:121225089-121226791
chr8:114239757-114243155
chr3:153787750-153789057
chr6:90490688-90492261
chr2:157365983-157367770
chr17:9359848-9361437
chr2:65019254-65019825
chr18:76780704-76781834
chr1:128579382-128582050
chr7:106943930-106944557
chr7:105230714-105231600
chr8:93888706-93890339
chr8:12477565-12478812
chr13:84537898-84539930
chr7:126055152-126056734
chr18:75593481-75595426
chr2:92965771-92967206
chr9:61421171-61422230
chr2:174326249-174327579
chr9:60696472-60697820
chr19:36970874-36972048
chr13:56359976-56361776
chr12:12700298-12701751
chr3:38562672-38563392
chr5:19413609-19415234
chr15:78008461-78009011
chr18:72494002-72495015
chr13:56875476-56876402
chr6:29384403-29386668
chr2:118844327-118845419
chr11:35706253-35707602
chr18:56175042-56176649
chr1:108095145-108097143
chr2:32028736-32031801
chr8:90456294-90457888
chr9:58286629-58287394
chr16:21273179-21275213
chr10:70414484-70415410
chr4:54033744-54035136
chr11:36490082-36492362
chr6:91566403-91567923
chr12:118157308-118159256
chr6:113031510-113033124
chr8:10721293-10721973
chr2:31960516-31961279
chr12:90097958-90099286
chr3:51767450-51770422
chr2:68207717-68208814
chr11:50320613-50321305
chr6:28966548-28967702
chr8:128370951-128372304
chr10:86813948-86815047
chr8:125330245-125331459
chr1:130481511-130484818
chr7:106503872-106505015
chr13:54423585-54425245
chr6:114832206-114833999
chr4:153967881-153969555
chr9:63727047-63729591
chr18:36032807-36035144
chr9:101152626-101154243
chr2:48278990-48279936
chr8:122868144-122868811
chr4:133574640-133576119
chr4:127918105-127919768
chr5:112265390-112266475
chr4:129710615-129711437
chr19:46581044-46582616
chr5:111796394-111798532
chr9:120641973-120643868
chr9:96950676-96952256
chr16:37583573-37585755
chr17:30633687-30636034
chr13:34239914-34242763
chr15:12151896-12153420
chr11:88208317-88209700
chr2:93066802-93069357
chr2:27279833-27282886
chr2:73114354-73116039
chr10:42803500-42804119
chr1:193285596-193286562
chr16:89923710-89925431
chr6:112879258-112881206
chr19:45385956-45387558
chr18:54878519-54880238
chr3:52618954-52620252
chr12:85489084-85489792
chr4:148240774-148241463
chr1:134555348-134558223
chr2:37557729-37559587
chr14:67042577-67044546
chr12:55153540-55154882
chr11:113901554-113902340
chr2:21062790-21064887
chr2:131015327-131017612
chr7:91549734-91551021
chr2:31615209-31616793
chr4:118926494-118927136
chr12:109493675-109494433
chr8:122708662-122709523
chr12:107319488-107321180
chr1:159173849-159174889
chr12:88147271-88149073
chr7:103068108-103068824
chr8:94135485-94137063
chr19:45089773-45093578
chr1:135991991-135996367
chr8:94032257-94034858
chr9:63380806-63383911
chr14:48692781-48694352
chr6:54458003-54459292
chr5:112019407-112020457
chr16:20701561-20702804
chr9:122501542-122502646
chr11:84084718-84086650
chr6:72184681-72185797
chr13:43901418-43903165
chr11:62425491-62429040
chr16:77536298-77538015
chr15:98458828-98459831
chr5:77211372-77212437
chr15:27712880-27713996
chr16:8669090-8672665
chr2:168451510-168452525
chr12:30327571-30328347
chr18:47763470-47764654
chr6:54222208-54223206
chr7:116992928-116994529
chr2:4219595-4220509
chr10:122320141-122322357
chr5:31385825-31387196
chr18:24027658-24028441
chr11:66659209-66660603
chr3:38452382-38453389
chr8:14532660-14533848
chr17:29302209-29303109
chr6:144199220-144200959
chr11:77698358-77699728
chr8:94396149-94397182
chr15:95143872-95145474
chr4:152207313-152209000
chr1:134818648-134819438
chr11:117835656-117838037
chr5:36682217-36682860
chr19:56103606-56105078
chr11:25755720-25757368
chr8:12104671-12105800
chr4:132603333-132605327
chr17:50566396-50567723
chr11:119017630-119018735
chr6:114246586-114247694
chr4:137637194-137638149
chr2:13306316-13307783
chr11:20549517-20551081
chr17:32316474-32317780
chr5:112106551-112107661
chr18:54611622-54614458
chr2:59535718-59536871
chr13:100378785-100380383
chr2:169230111-169231430
chr6:50839613-50843626
chr1:157636973-157637977
chr11:31957293-31958212
chr5:140424818-140425798
chr9:108685207-108688367
chr9:16202515-16204269
chr11:88337270-88341540
chr10:42823459-42824258
chr4:127852243-127854090
chr9:48541574-48542714
chr16:78313982-78314945
chr1:168852669-168853560
chr17:48651998-48652495
chr16:11007550-11009244
chr13:60226831-60227860
chr6:86437073-86438433
chr18:79303056-79307822
chr1:153830386-153832190
chr2:13096392-13098215
chr17:27655260-27656874
chr7:30044819-30045430
chr13:59192596-59194789
chr5:112665368-112669120
chr5:111875404-111876676
chr6:144989228-144990121
chr1:184851872-184853527
chr4:152860731-152862000
chr1:120806969-120808278
chr2:38544152-38545168
chr4:107270586-107271246
chr14:35716343-35717185
chr6:85978612-85979638
chr7:82998801-82999899
chr8:90467730-90468369
chr9:45928073-45928812
chr1:66366623-66370870
chr19:46111866-46114742
chr11:79426355-79427528
chr9:60071854-60072499
chr4:62267135-62269511
chr18:54337935-54340168
chr4:32437657-32439175
chr16:92323733-92325561
chr7:145344674-145345925
chr4:119914099-119916005
chr7:151839425-151840330
chr2:20981206-20982737
chr8:71919101-71919404
chr14:104297894-104299054
chr2:21839354-21840701
chr11:11721611-11723239
chr3:116210285-116210969
chr6:127279788-127280882
chr17:87726203-87727129
chr6:100920077-100921615
chr6:112829947-112831473
chr6:30567846-30568940
chr7:137511124-137512843
chr7:120027354-120028349
chr19:41820412-41821251
chr14:118629074-118631864
chr11:88234475-88235783
chr17:72329735-72330861
chr16:23270105-23271651
chr8:122806312-122807842
chr5:38287887-38289543
chr4:82704036-82705262
chr4:138049112-138052635
chr14:34542204-34543690
chr4:136673629-136674513
chr8:8577644-8578766
chr2:44950598-44953758
chr4:63240830-63241633
chr5:15508045-15511531
chr4:9360009-9361770
chr4:139532781-139533951
chr18:38000825-38002573
chr4:22022403-22023917
chr11:80390424-80392347
chr16:21395372-21396267
chr8:122948188-122951484
chr2:151855173-151856039
chr16:35484159-35484985
chr9:74808364-74809528
chr13:59596561-59597739
chr17:28606395-28608147
chr13:48266819-48267879
chr4:55221160-55222262
chr19:47585094-47586011
chr5:100520027-100521428
chr12:81114090-81115887
chr1:170278151-170279128
chr19:41771515-41772574
chr8:118688201-118689770
chr3:148005947-148007396
chr4:148950475-148951534
chr10:12836895-12838896
chr2:20967672-20971891
chr5:73627925-73628628
chr9:72681732-72682710
chr6:49223699-49224743
chr2:173063482-173064741
chr9:114661745-114662561
chr6:88836133-88837372
chr4:132567436-132569745
chr7:152080607-152081893
chr15:25619343-25620559
chr6:81610064-81611782
chr11:119668555-119669394
chr1:130296510-130298095
chr10:17546498-17548347
chr2:4479476-4482701
chr9:58711262-58712171
chr12:109478067-109480691
chr8:122985768-122986681
chr1:9737494-9738436
chr8:122871218-122872980
chr15:86018470-86019646
chr8:126972909-126974063
chr6:55337868-55339324
chr19:26821346-26824912
chr6:88921241-88922683
chr15:82729286-82730224
chr8:123072123-123075284
chr10:79510426-79511754
chr1:158719583-158720772
chr12:110798188-110799540
chr2:136926572-136927513
chr8:87184001-87184697
chr17:46590773-46593030
chr5:114422434-114424203
chr12:107717507-107718265
chr3:121092627-121094007
chr12:40701420-40703011
chr13:52110197-52111378
chr4:109241168-109242334
chr8:94589453-94590283
chr1:153851115-153853049
chr7:53856693-53858576
chr18:55706239-55710130
chr12:87561560-87562270
chr17:73889491-73890565
chr16:16911320-16913102
chr11:23960788-23962961
chr16:34003572-34005625
chr8:68489523-68491422
chr6:127690128-127692283
chr3:96741233-96742098
chr9:41110777-41112238
chr18:79169439-79170389
chr6:36738091-36740413
chr5:131399480-131400925
chr11:32037649-32038913
chr2:106696133-106697305
chr8:27732520-27733579
chr3:55226122-55228800
chr8:111770984-111773013
chr5:129731668-129732946
chr2:170482931-170483745
chr5:121129655-121130778
chr9:48563564-48564709
chr4:115725137-115726746
chr6:93860922-93864277
chr6:91234446-91235581
chr17:29874956-29875918
chr11:32282883-32284401
chr1:78177863-78179894
chr10:122367250-122369881
chr2:112560714-112561821
chr12:33756958-33758135
chr9:61251927-61253843
chr11:112671576-112674238
chr18:79262313-79269881
chr1:156678190-156679655
chr2:91269733-91271292
chr18:44734083-44735713
chr7:80761927-80763873
chr1:169046255-169047002
chr6:28930704-28931631
chr4:150912737-150914512
chr9:22494470-22495760
chr4:139773914-139775814
chr8:94236827-94237562
chr7:108080068-108080985
chr4:136289282-136289941
chr11:24271927-24273234
chr10:42825613-42826698
chr5:112170555-112171745
chr16:49937306-49938768
chr1:42933008-42935648
chr11:117459095-117459892
chr5:132250798-132251983
chr1:170093546-170095189
chr2:153251496-153253059
chr2:50592967-50596156
chr1:174412376-174413748
chr9:47546481-47548027
chr7:72162827-72163686
chr2:93173036-93174599
chr9:14417294-14419974
chr12:87443739-87445118
chr2:26387876-26391935
chr11:78633579-78634487
chr4:153070513-153071597
chr7:52490180-52491154
chr2:127951831-127954759
chr18:64948987-64951065
chr7:123008867-123010554
chr1:91337578-91338580
chr10:121319223-121319919
chr1:185889521-185891120
chr12:105451718-105453101
chr5:139894086-139895369
chr1:135077664-135080367
chr2:33882813-33883731
chr1:153916698-153917918
chr8:106585767-106586674
chr12:12731786-12733056
chr8:91220948-91221475
chr11:78599124-78599971
chr11:77977560-77978992
chr8:46083807-46084643
chr2:173078688-173080426
chr5:28448728-28452292
chr11:57600300-57600829
chr6:51797128-51801360
chr3:94287484-94288888
chr7:137463391-137464324
chr5:106194955-106196600
chr5:109106296-109107189
chr9:108114958-108116699
chr5:127827476-127828340
chr11:31909971-31910962
chr14:61172332-61173811
chr13:57209127-57209887
chr12:30052879-30054401
chr7:150088633-150090857
chr2:93030933-93033522
chr4:123725779-123726310
chr11:119037671-119038486
chr10:84428581-84431041
chr4:124154665-124155660
chr4:62242902-62245734
chr4:126909144-126910680
chr2:169098040-169098793
chr8:111431794-111433439
chr12:55135019-55136228
chr4:43261019-43262024
chr9:44534034-44534714
chr5:114917124-114918018
chr6:90665176-90666305
chr19:41747090-41748314
chr4:135838483-135839362
chr6:77919212-77921445
chr15:85287247-85289844
chr5:125614466-125615961
chr8:111861507-111862864
chr2:165040656-165041387
chr1:33988338-33989288
chr7:137789504-137790841
chr8:123059648-123063659
chr3:87789045-87789655
chr4:122639494-122640979
chr10:43462228-43463330
chr4:32389249-32393781
chr2:84581770-84584829
chr7:119828208-119829683
chr11:24204994-24206099
chr8:81601858-81603669
chr6:127984289-127985252
chr2:171681800-171682601
chr8:73222129-73225412
chr6:112834685-112836520
chr6:128062232-128062887
chr11:35919947-35923506
chr9:95714112-95714969
chr2:84474567-84476882
chr6:142815339-142816877
chr3:119651947-119653220
chr1:170238234-170239879
chr9:16289565-16291686
chr11:105153691-105154846
chr1:100086541-100088852
chr12:28221603-28222307
chr9:36757898-36759050
chr12:27867326-27868416
chr12:27827589-27828618
chr2:50921275-50922907
chr10:69097986-69099372
chr15:53756491-53757312
chr16:91770376-91772133
chr3:101767821-101768838
chr2:27156402-27157813
chr12:110073559-110074923
chr4:153179993-153181238
chr2:31721221-31722319
chr13:34761825-34762192
chr16:44529363-44532626
chr8:90183710-90187412
chr8:124421721-124423560
chr5:134713935-134715835
chr2:72619219-72620675
chr12:108567199-108568006
chr9:51996088-51996489
chr16:18400671-18401821
chr9:45470380-45474354
chr9:63501065-63501950
chr13:98670072-98670450
chr5:112910736-112911970
chr8:111278880-111280172
chr18:79178004-79182178
chr4:140212548-140214873
chr5:112159710-112160588
chr2:92566630-92567612
chr9:71788877-71790133
chr6:127970217-127971034
chr4:147587863-147588725
chr9:49402886-49404319
chr2:135933251-135934997
chr4:107417626-107418623
chr11:117352957-117353724
chr4:119648947-119649971
chr4:106632188-106633164
chr3:101727665-101728751
chr1:194660462-194661579
chr1:194581380-194582596
chr1:195860285-195861057
chr9:51975601-51977266
chr19:8786982-8788641
chr3:94283777-94285067
chr10:75381010-75381928
chr2:164956512-164957577
chr4:155158225-155158736
chr15:83529204-83530644
chr5:103589135-103591831
chr8:12429699-12431667
chr15:72564623-72566324
chr13:29106474-29108301
chr11:90232069-90232637
chr17:23926894-23928187
chr6:51716444-51718642
chr18:57420766-57423209
chr11:115094019-115095923
chr17:31019066-31019956
chr11:60107258-60108685
chr11:107277353-107278605
chr11:98786802-98787635
chr12:113401526-113402911
chr2:129625988-129628058
chr5:132766187-132767967
chr11:98843192-98843971
chr8:90441175-90442438
chr5:114185205-114186255
chr17:8559523-8562310
chr18:76170249-76171576
chr14:14902573-14903989
chr9:121719225-121720278
chr1:36121233-36122341
chr5:114749364-114750359
chr11:18889443-18890462
chr1:194367438-194369040
chr9:64956033-64958909
chr9:103047445-103050925
chr17:84908013-84908699
chr10:94084043-94086939
chr5:100165850-100167732
chr19:22731114-22732134
chr5:129087372-129088027
chr11:116504802-116505233
chr13:72200434-72201277
chr15:53114793-53116317
chr3:40489526-40491189
chr9:42234230-42235204
chr1:184798492-184800193
chr4:122676098-122676906
chr7:149120464-149121427
chr4:71827579-71829753
chr5:30768455-30770703
chr3:138189484-138191058
chr13:91509673-91512056
chr2:50938041-50938943
chr8:48369139-48371458
chr4:108908927-108909732
chr5:112990065-112991076
chr17:47658214-47659731
chr11:80316908-80318714
chr12:103968218-103969876
chr7:122788759-122790376
chr9:47793387-47794644
chr6:124853105-124855299
chr9:44531939-44532965
chr18:23961501-23963436
chr12:82267143-82267817
chr8:124192420-124193059
chr12:30313959-30315399
chr2:38552774-38553501
chr2:108667321-108668270
chr8:122822173-122823432
chr11:69222346-69225840
chr9:108351975-108353397
chr6:98063793-98065039
chr8:8574673-8575604
chr18:75547126-75547601
chr12:113537095-113537949
chr11:76080719-76082120
chr7:138004062-138005247
chr6:106962401-106963785
chr6:127960202-127961543
chr2:118726012-118728594
chr13:114771461-114772448
chr4:10899795-10900760
chr1:78154136-78156780
chr2:36053888-36054567
chr2:17591357-17591853
chr8:47776790-47778222
chr2:33491344-33492917
chr11:35678203-35679695
chr7:86722274-86723082
chr15:85319679-85320881
chr13:40982203-40982780
chr7:83330006-83331093
chr14:52947098-52948086
chr14:80072851-80073774
chr5:125638863-125640387
chr6:28791609-28793300
chr2:178585322-178586570
chr2:30546281-30551359
chr11:80947303-80947851
chr14:52629272-52631412
chr2:34211357-34212116
chr7:35489134-35490019
chr8:8482297-8485913
chr11:69227891-69233100
chr11:47453686-47455391
chr1:92101487-92102073
chr14:49048864-49049831
chr1:168209728-168211554
chr15:72691384-72693379
chr11:57401363-57401957
chr12:101545622-101546258
chr15:90886600-90887506
chr3:86656645-86658043
chr4:132925652-132926107
chr19:32462659-32464311
chr2:30562486-30565104
chr11:101750538-101751301
chr9:16109152-16110269
chr17:26912835-26913723
chr1:57275479-57276252
chr7:16715219-16716127
chr2:132270687-132271385
chr11:4661760-4662596
chr9:28062497-28063905
chr18:69135755-69137024
chr4:108016946-108017365
chr11:102307798-102308868
chr16:7404686-7405390
chr13:59244955-59246188
chr1:75285697-75287084
chr10:12827420-12829148
chr4:136297816-136299324
chr8:91012103-91013380
chr8:97524078-97525499
chr11:44470881-44471726
chr3:104972042-104972564
chr2:12249676-12250690
chr15:82686920-82687834
chr5:112468503-112470958
chr11:63711702-63712592
chr1:135282358-135283336
chr6:39998256-40000830
chr4:41574770-41576301
chr9:45464990-45466504
chr11:44795560-44796009
chr10:96343928-96345279
chr3:107968003-107971032
chr19:6502318-6502854
chr11:81710872-81711865
chr10:119121108-119122319
chr9:74821717-74825328
chr11:53289082-53289366
chr8:91769065-91770105
chr4:153767046-153767849
chr9:43177776-43178885
chr11:11724000-11726274
chr2:50665447-50667138
chr6:92771248-92772334
chr12:8928153-8930247
chr14:68815439-68816355
chr11:89557629-89558479
chr19:42365313-42366694
chr10:128327879-128330309
chr10:22378375-22379450
chr15:88982592-88983229
chr11:115228306-115228961
chr17:10096920-10099632
chr8:124494828-124496140
chr1:168942646-168944484
chr1:78135036-78141822
chr1:135330736-135331597
chr19:41744194-41744858
chr4:106781058-106781993
chr17:83926536-83927583
chr19:48063434-48064361
chr3:103445045-103445525
chr12:110197344-110198219
chr14:29770851-29772621
chr4:127664255-127666113
chr8:92767070-92770621
chr2:29259629-29260712
chr2:181315553-181316713
chr17:12397494-12399450
chr8:10988956-10992548
chr4:22762416-22762923
chr17:32642635-32643825
chr15:37163491-37164452
chr4:106537836-106540070
chr17:71143243-71144522
chr2:32012531-32013568
chr4:120046330-120046758
chr11:112687256-112688724
chr6:52807603-52808907
chr13:28902265-28904419
chr16:8565896-8567070
chr7:143457995-143460453
chr17:31927063-31928755
chr10:41791064-41791912
chr9:57349117-57349936
chr2:145993884-145995450
chr15:76886475-76887159
chr2:179558392-179559278
chr12:8333842-8334462
chr5:112322501-112323360
chr11:33672200-33673118
chr3:153401402-153402129
chr13:29288011-29289263
chr15:101837143-101839019
chr8:8241447-8242848
chr9:31087051-31089598
chr8:37217814-37219892
chr9:102628605-102629246
chr7:150629168-150632315
chr5:93555728-93557120
chr15:98807589-98809843
chr4:136310342-136314058
chr4:125373242-125374107
chr8:27462285-27462753
chr4:128127788-128128985
chr1:42685011-42685910
chr11:59521168-59521979
chr13:48197650-48198684
chr2:166062874-166064179
chr17:13806163-13807939
chr4:43221934-43222897
chr13:43779762-43780258
chr12:118437256-118437788
chr3:83567985-83568770
chr8:122897862-122901021
chr11:120166197-120167262
chr14:26452480-26454032
chr4:154413888-154414936
chr9:103021389-103022989
chr17:15480006-15480681
chr13:71813834-71814384
chr8:93393008-93396061
chr7:107113437-107115139
chr13:72438517-72441945
chr7:117874788-117875740
chr2:109782450-109785196
chr11:119947546-119948117
chr15:29363042-29363447
chr11:78883044-78883805
chr17:31806919-31807775
chr8:123055284-123057351
chr2:50771557-50772895
chr14:66996894-66997651
chr4:148142283-148143226
chr2:101842315-101844590
chr6:30496514-30498156
chr19:26920112-26920759
chr14:80100610-80101276
chr5:132424308-132425002
chr11:118003682-118004455
chr16:7217761-7219000
chr9:37589808-37590926
chr10:76613413-76614603
chr3:54769079-54770198
chr7:116257871-116259932
chr13:59247341-59247889
chr11:118057988-118060057
chr4:130635854-130636646
chr14:59824255-59825161
chr5:31076186-31077631
chr1:64270419-64270968
chr15:72718596-72720152
chr4:154563212-154564031
chr6:87688156-87688712
chr3:79074980-79075632
chr2:163028546-163029194
chr1:170347150-170348561
chr3:65431431-65432045
chr4:139391822-139392756
chr17:30324636-30325864
chr2:152655760-152657456
chr5:143886997-143887422
chr18:34105772-34109094
chr11:60198057-60199140
chr15:58871568-58873631
chr6:47189283-47190272
chr17:8563320-8566282
chr15:73986346-73988240
chr2:165036077-165037571
chr12:118438595-118439298
chr11:86796033-86797413
chr5:110845111-110846888
chr4:138019199-138020359
chr7:81274916-81275697
chr1:136203809-136204619
chr5:150020647-150021643
chr4:135587037-135588088
chr3:55391796-55393459
chr5:149642709-149643202
chr2:131331821-131332968
chr11:44559761-44561203
[truncated: 2,433 more rows]

## Sheet: Late
Late Active Cerebellar Enhancers
chr15:85490212-85517244
chr19:23207613-23212009
chr4:82229963-82238836
chr9:90584172-90599668
chr15:53653246-53657377
chr9:91024921-91025579
chr14:122771359-122790912
chr1:92586981-92588961
chr4:97417905-97426308
chr4:82181568-82188041
chr2:145795066-145799115
chr13:84894823-84898958
chr6:125439647-125444772
chr1:183806469-183809087
chr9:96224199-96228153
chr13:112715055-112719381
chr4:139747344-139749295
chr2:155620144-155622352
chr2:3506557-3509114
chr2:32671617-32674300
chr13:112573041-112590860
chr5:37283131-37287245
chr4:82140521-82144577
chr12:86158983-86161576
chr5:115214098-115216800
chr7:71135925-71137706
chr5:75574996-75577134
chr8:127200490-127201488
chr7:129077119-129084852
chr4:97576919-97579723
chr5:150953900-150956410
chr1:156846067-156847826
chr9:70805752-70808892
chr2:104157597-104159492
chr18:69734198-69742276
chr2:105362453-105366516
chr2:105637738-105645035
chr6:125429698-125432763
chr10:93400995-93402623
chr13:19391213-19393645
chr8:87321324-87324528
chr9:61972834-61974328
chr9:62069137-62071095
chr16:91866033-91869887
chr1:178875606-178878297
chr8:90587977-90589551
chr9:40189022-40191287
chr14:55671154-55674784
chr5:37129244-37130977
chr11:6379703-6382633
chr13:113045336-113048251
chr1:193640045-193642543
chr5:37277320-37280769
chr15:74581790-74583331
chr16:29711264-29712700
chr9:40338138-40339214
chr17:66581995-66583114
chr17:81380904-81382696
chr5:114176999-114178667
chr8:125274536-125276664
chr2:181197449-181198606
chr5:28576504-28580606
chr4:141321895-141324456
chr2:105498782-105504308
chr19:5740482-5742746
chr7:99608631-99610626
chr12:26549191-26551287
chr10:13458997-13460360
chr10:90247338-90248772
chr12:112084210-112085436
chr10:128375373-128376468
chr13:19363834-19366438
chr4:97337741-97339879
chr2:155613330-155614917
chr7:151479641-151482021
chr17:25213239-25215520
chr17:31555263-31557104
chr2:155630181-155631941
chr6:140429967-140433285
chr13:112836195-112838399
chr18:36024747-36025461
chr2:153788438-153790380
chr15:58908995-58909607
chr11:115870746-115872532
chr13:84899783-84901585
chr11:83279830-83280617
chr15:58811911-58813600
chr15:66345756-66347308
chr6:143363113-143364180
chr18:74091511-74092988
chr17:45655517-45656757
chr16:30595465-30596961
chr15:85518710-85520143
chr9:70777387-70779206
chr8:87316460-87319676
chr16:36949854-36951793
chr7:121432620-121435685
chr9:91303786-91306391
chr12:87987257-87989113
chr1:151517328-151519998
chr2:124857653-124858952
chr10:116307420-116309339
chr2:37868204-37869690
chr13:112787022-112789734
chr1:59368521-59370312
chr6:118233463-118235422
chr13:114162636-114164745
chr8:127029150-127029851
chr7:105526893-105530182
chr7:105550551-105553279
chr13:112768204-112769627
chr4:124835559-124836827
chr6:117168415-117170310
chr11:116782160-116784257
chr3:17952305-17953111
chr4:84906436-84908673
chr8:87288488-87291270
chr8:87357953-87360021
chr10:79794796-79796261
chr5:150140243-150141213
chr5:65437082-65437900
chr5:124902892-124904234
chr3:8560711-8561670
chr13:21127653-21128703
chr5:43730203-43731760
chr15:85532203-85533098
chr13:48004808-48006233
chr11:3732955-3734717
chr2:30961607-30963541
chr1:178685634-178687023
chr10:69667017-69668135
chr4:8945708-8947704
chr9:58905938-58908239
chr17:35920595-35921563
chr11:59840862-59842184
chr16:37622370-37624686
chr18:42863976-42865310
chr9:62038114-62039733
chr10:83819848-83822296
chr13:51900425-51902038
chr18:69674392-69679739
chr7:120385471-120386337
chr7:109147837-109148731
chr18:65829995-65831669
chr11:61038630-61040383
chr10:93406965-93409166
chr13:49267296-49268456
chr3:55343287-55347270
chr15:83925168-83926661
chr19:57022438-57023430
chr4:115847922-115850151
chr7:107183901-107185858
chr4:8792503-8793818
chr15:37250837-37251630
chr6:67087318-67088406
chr11:113414409-113417082
chr13:105299633-105301238
chr15:58748080-58751825
chr4:46970501-46971322
chr17:35913441-35914399
chr4:81210562-81229698
chr16:43190389-43193341
chr4:53528176-53529945
chr4:99655775-99658994
chr1:158574330-158576470
chr2:75766556-75769131
chr19:40483957-40487266
chr4:82288184-82290731
chr15:85482071-85489797
chr11:21893816-21897291
chr2:28722391-28724053
chr6:116948570-116950340
chr12:112962005-112964848
chr5:37267225-37269283
chr2:79245297-79247033
chr9:40144110-40147860
chr1:179502705-179504803
chr11:101386136-101388263
chr1:156734262-156736601
chr13:112949076-112951517
chr5:37305473-37309640
chr12:79199685-79201286
chr11:16639742-16642191
chr2:28567849-28569332
chr1:178858223-178865558
chr8:107053244-107054339
chr2:166457188-166458942
chr17:26560920-26562489
chr11:16730797-16732533
chr9:58903527-58905093
chr13:33177032-33178849
chr4:141616223-141617879
chr5:35471615-35473339
chr17:81301525-81304095
chr7:30172252-30173471
chr19:16361826-16363922
chr16:95313416-95316113
chr9:40530748-40532232
chr9:40312610-40314120
chr7:140957209-140958441
chr4:87841911-87843709
chr8:128530118-128531564
chr1:134465698-134471289
chr4:128820867-128822882
chr5:104218062-104219194
chr5:37302048-37304534
chr5:147869819-147871636
chr12:26796520-26798117
chr2:145183324-145185350
chr17:88735080-88736234
chr10:122141375-122144262
chr1:178585503-178586662
chr5:37294816-37296892
chr9:101512371-101513520
chr15:85530061-85531308
chr17:6993754-6994533
chr4:82343329-82352763
chr13:24208570-24210047
chr7:148687710-148689151
chr7:53931720-53933334
chr4:148024592-148025806
chr12:26798664-26801885
chr13:112726078-112728223
chr17:68754347-68756334
chr9:66883619-66884247
chr14:65738113-65739378
chr2:75796603-75799995
chr4:99800496-99801843
chr11:44438357-44440856
chr5:106657150-106659037
chr6:100841730-100843578
chr11:94564490-94566266
chr11:86200202-86201395
chr13:49575215-49576904
chr17:79942929-79943995
chr11:97392216-97394409
chr9:102969143-102970513
chr7:88038083-88039681
chr8:128482791-128484316
chr4:116489735-116490991
chr10:41838316-41839336
chr17:70811129-70813061
chr4:128801481-128803377
chr1:136170019-136173357
chr4:107301091-107301777
chr11:87355555-87357360
chr15:101946283-101948543
chr19:4492430-4493703
chr12:103899228-103900832
chr11:4042909-4044292
chr5:30099129-30101087
chr7:88685522-88688261
chr19:23013278-23015473
chr2:52919575-52921516
chr5:110991616-110992500
chr10:120869403-120870706
chr8:121403372-121404743
chr2:158040962-158042744
chr14:25892913-25894695
chr2:152873500-152876375
chr19:6266886-6267873
chr12:69875956-69877226
chr9:59036168-59037604
chr13:109623629-109624945
chr2:52031859-52033253
chr10:80873858-80880280
chr17:49134125-49135001
chr11:48684398-48685872
chr8:70568293-70569647
chr13:58927185-58928258
chr6:50638462-50640402
chr2:152844544-152845957
chr10:76968253-76971125
chr17:29857342-29858143
chr13:102257338-102258461
chr14:63673380-63674265
chr11:18770516-18772674
chr17:31713167-31714173
chr14:77027241-77028854
chr11:119849474-119851464
chr11:55154946-55156381
chr5:149300660-149301977
chr11:53820621-53821924
chr8:128586494-128589031
chr13:112790641-112793698
chr11:81299579-81300635
chr9:101763453-101765901
chr5:124443213-124444422
chr8:122684260-122685223
chr4:53499930-53502721
chr6:88744100-88745338
chr2:105506752-105507483
chr4:97275422-97278327
chr11:97398168-97399083
chr12:88301349-88302093
chr6:72576782-72577898
chr5:125701923-125703092
chr14:120517681-120519465
chr4:49052003-49053112
chr15:85476027-85477872
chr2:146189531-146192709
chr12:78611818-78613161
chr11:69520179-69521316
chr6:47769857-47770851
chr7:75374257-75376177
chr11:50042193-50043116
chr15:59109433-59111030
chr5:53539491-53540682
chr7:25896975-25898160
chr3:105508068-105509661
chr10:76466984-76468354
chr4:147429863-147431431
chr7:140923692-140924750
chr19:5151252-5152762
chr12:119009059-119010146
chr11:59843169-59844344
chr11:119070356-119071473
chr4:144472363-144473136
chr9:96222581-96223615
chr2:75790767-75791752
chr15:72190102-72191701
chr7:53973596-53974920
chr12:70518809-70519415
chr7:116181362-116182867
chr5:143070996-143072099
chr9:29598757-29599867
chr19:27672417-27673417
chr9:102190036-102191151
chr7:89442456-89444589
chr19:27584020-27585935
chr19:40469076-40471753
chr17:25248347-25249524
chr18:56828524-56829376
chr16:42319422-42321067
chr17:4297336-4298039
chr13:105653445-105654087
chr11:30057958-30060126
chr11:114537226-114538673
chr13:113003698-113004369
chr1:89123554-89124792
chr19:40546085-40546911
chr18:74099035-74100470
chr2:179383228-179383860
chr1:24229251-24230683
chr1:22252102-22252810
chr12:78629140-78630377
chr9:50973062-50974639
chr19:23475545-23476682
chr5:24379597-24380559
chr14:27726762-27727920
chr6:50752677-50753444
chr10:70939835-70941372
chr9:27424578-27425619
chr1:195020443-195021442
chr4:66062324-66062768
chr12:26676133-26677274
chr16:37472502-37473303
chr3:65631282-65632321
chr14:122765072-122767908
chr2:6981392-6982246
chr18:39037490-39038603
chr4:124853576-124854523
chr2:119642555-119643477
chr1:178126836-178127945
chr8:67681684-67682888
chr1:190886993-190891325
chr4:42085314-42086204
chr8:128279942-128281283
chr2:105321728-105323220
chr14:64764623-64766139
chr7:139911736-139912265
chr2:104219247-104220210
chr12:101361322-101362379
chr11:115922624-115923981
chr4:134229851-134231156
chr4:46096996-46098850
chr7:139966722-139969725
chr4:147454575-147455419
chr15:83707398-83708390
chr15:78528790-78529826
chr2:127582539-127583884
chr12:113158080-113158979
chr15:83961778-83962389
chr10:69258840-69259495
chr12:103656906-103659018
chr18:75779891-75780877
chr5:129152028-129152661
chr1:178612186-178614073
chr5:33864260-33865305
chr10:74650455-74650829
chr8:128891569-128892706
chr1:59462089-59462790
chr16:90778300-90779160
chr18:50148717-50149253
chr4:97545737-97548148
chr7:29347255-29347954
chr9:121575721-121577157
chr9:44500166-44500916
chr4:128369995-128370917
chr7:38121293-38123499
chr10:77007977-77008387
chr8:11336033-11337079
chr5:113173342-113174571
chr11:101561143-101561991
chr18:12947187-12947925
chr1:83447373-83448551
chr10:77760157-77761556
chr15:88672147-88673188
chr3:56570175-56571587
chr5:136962312-136963349
chr2:28492428-28493281
chr14:70938530-70939294
chr6:141169366-141170273
chr5:122261383-122262240
chr13:44561275-44562051
chr17:65025911-65026867
chr2:152747802-152749900
chr14:101836582-101837197
chr13:46445174-46446239
chr11:32035910-32036244
chr14:86889666-86890477
chr16:29714475-29715528
chr8:108850317-108851137
chr8:24146586-24148338
chr4:136207796-136210112
chr9:121291836-121293289
chr8:89640010-89640394
chr17:81246271-81246675
chr17:50337600-50339530
chr18:84298139-84299939
chr7:139950237-139952461
chr1:134434134-134434830
chr14:78342666-78343394
chr7:75462920-75463954
chr1:38275071-38275857
chr4:34927492-34929111
chr1:195023172-195024742
chr4:46458090-46458778
chr3:59205380-59205877
chr8:45775926-45776467
chr8:113948267-113948643
chr12:85339250-85339883
chr11:78194150-78195187
chr14:48703645-48704676
chr11:5930421-5931577
chr10:43321358-43321898
chr6:86518787-86519582
chr9:121728654-121729141
chr13:112124210-112124999
chr9:62319949-62320972
chr13:112567132-112569736
chr9:62035828-62037382
chr16:95423658-95424742
chr9:112625321-112626437
chr2:4291364-4292480
chr9:95060960-95062081
chr5:140205910-140208004
chr14:30035709-30036878
chr2:32055393-32056603
chr9:23990416-23991579
chr2:168305260-168305953
chr6:126535714-126536670
chr10:79038255-79039115
chr19:53574329-53575684
chr7:140083743-140084604
chr8:113483425-113484435
chr4:134541464-134542415
chr15:84499948-84500291
chr13:51911578-51913080
chr13:64019550-64020829
chr5:108944688-108945294
chr10:79396660-79397410
chr16:97891761-97892548
chr12:84033740-84034733
chr1:137576335-137579595
chr19:6302584-6303278
chr8:24162701-24164234
chr10:80199494-80200185
chr4:129947107-129948050
chr13:93502464-93504735
chr8:72723403-72724547
chr17:84767016-84768795
chr4:45767399-45769925
chr11:94006310-94007386
chr15:85440602-85445088
chr4:117822534-117823799
chr1:73121869-73122782
chr1:91972892-91973537
chr7:59070604-59071472
chr7:139960371-139961197
chr13:36625093-36626173
chr4:129756229-129756961
chr2:167310805-167311835
chr12:80053131-80053861
chr13:20553230-20554187
chr4:119500851-119501836
chr3:59751526-59752671
chr14:64331488-64332253
chr15:82107645-82108894
chr4:8802365-8805056
chr5:139614056-139614809
chr6:117972936-117973711
chr13:54980266-54980910
chr12:26479058-26480483
chr11:116459604-116460223
chr9:101612590-101613101
chr6:118703558-118704676
chr14:77139773-77140255
chr2:91811151-91812114
chr11:61282139-61283203
chr7:81602524-81603456
chr11:84378619-84379431
chr5:37291247-37292371
chr12:80611992-80613524
chr16:37442844-37443402
chr3:137740370-137741052
chr11:61041364-61041881
chr14:9041485-9042035
chr14:71404903-71405277
chr18:49524276-49524560
chr2:25437020-25438975
chr1:190903737-190904367
chr8:115105107-115106002
chr7:137061443-137062726
chr4:116658957-116659791
chr14:49526620-49527155
chr13:95145502-95146034
chr2:146079968-146081072
chr11:65249543-65249966
chr8:113489290-113489523
chr1:136594969-136596921
chr15:81750835-81751822
chr11:103751418-103752813
chr11:72829086-72829969
chr4:134094870-134095726
chr2:103793446-103794004
chr1:136232285-136233038
chr4:53524477-53527141
chr4:97105961-97106450
chr11:116482457-116483161
chr10:105551060-105552032
chr9:106594552-106596248
chr2:173003181-173004084
chr8:106833666-106834590
chr16:35240320-35240530
chr14:64757925-64758972
chr10:60282925-60284354
chr2:142422386-142422837
chr7:56342420-56343330
chr4:119861519-119862648
chr5:37274678-37276019
chr8:87252072-87256707
chr5:122852463-122852947
chr14:66025223-66026111
chr1:192772555-192773352
chr11:112953497-112954221
chr17:6983223-6984193
chr13:115628571-115629829
chr16:90793562-90794246
chr5:124447099-124448540
chr8:74819618-74820139
chr12:81607915-81608540
chr13:43995104-43996260
chr14:77016910-77017793
chr15:98771309-98771701
chr10:114487394-114487802
chr5:139874725-139875068
chr9:62000734-62001787
chr6:36900180-36901458
chr18:39457973-39458962
chr10:85781004-85781596
chr9:27908878-27909714
chr11:71880551-71881942
chr5:73087445-73087935
chr19:5975328-5976031
chr15:75686323-75688104
chr4:106137471-106137903
chr19:6929966-6930641
chr17:73620781-73621846
chr5:150059112-150059731
chr15:25643629-25644310
chr2:158068193-158068949
chr12:81292088-81292652
chr4:82329466-82330976
chr14:64928610-64929922
chr6:50733232-50734250
chr16:43931337-43932433
chr6:135379090-135380468
chr13:29850549-29853243
chr14:60300593-60301148
chr12:86181743-86182819
chr8:87230514-87231094
chr16:21645978-21647596
chr3:104187696-104188235
chr18:68966194-68966835
chr2:58635817-58636435
chr3:55450930-55453667
chr2:137872861-137873939
chr5:32635900-32639398
chr1:171397493-171398611
chr7:61889239-61890255
chr1:59623477-59625106
chr1:137999070-138001318
chr8:24587863-24588456
chr10:120904135-120904692
chr13:28678460-28679554
chr1:64045891-64046349
chr9:72239548-72240241
chr1:188378403-188379864
chr14:63010872-63012307
chr7:139981940-139984096
chr6:53321692-53322466
chr15:77915951-77916591
chr1:175732375-175734265
chr4:20565738-20567537
chr10:93921460-93922122
chr2:85049591-85050362
chr10:93875565-93877856
chr5:125971490-125972104
chr5:39272843-39273443
chr13:84190757-84207345
chr12:12832588-12833278
chr4:34923808-34924128
chr5:21991919-21993368
chr7:58563366-58563746
chr11:32522704-32523024
chr3:99906200-99907179
chr2:132338996-132340588
chr3:156582947-156583622
chr7:31079728-31080120
chr7:114662597-114663656
chr1:192587470-192588247
chr3:87935931-87938104
chr15:74740086-74741329
chr1:11016963-11017363
chr10:115798897-115800199
chr12:3761221-3762516
chr6:126312211-126312414
chr15:85459710-85460954
chr11:94562933-94563399
chr12:85121833-85123167
chr4:82591396-82593330
chr6:140467108-140469310
chr9:41880098-41880746
chr5:44542789-44543072
chr7:135710999-135711923
chr18:35178085-35180812
chr10:122185264-122187942
chr9:89418428-89419669
chr11:113053886-113054245
chr11:87628303-87628620
chr12:77365220-77366042
chr2:102439218-102439964
chr2:113494495-113495743
chr10:69158646-69159291
chr3:88202329-88203566
chr12:5435277-5436147
chr15:94873285-94875636
chr10:85783695-85784162
chr5:106479936-106480177
chr17:29960103-29960916
chr18:14017347-14018375
chr9:21552116-21553085
chr4:125794105-125796572
chr4:148691424-148692140
chr14:56134723-56135309
chr13:105380501-105381065
chr4:90783763-90784042
chr9:42357738-42358268
chr7:139403632-139404167
chr2:152619579-152620948
chr5:149143451-149143874
chr11:6789344-6790166
chr17:50546081-50547679
chr9:118135213-118139551
chr18:60920899-60921467
chr10:120856575-120857718
chr8:121475153-121476559
chr13:20727908-20728345
chr19:21209193-21211418
chr5:74455184-74458430
chr2:155464750-155469044
chr5:38778900-38779684
chr1:156653173-156653645
chr19:22979300-22980132
chr2:145783561-145784790
chr12:112598985-112599386
chr10:45017794-45019006
chr13:54364989-54365773
chr10:69191547-69194842
chr8:11780321-11780843
chr1:17049365-17050763
chr8:121485260-121486856
chr3:69165628-69166954
chr3:51512760-51513158
chr7:117997688-117998075
chr3:96785807-96787438
chr12:78032901-78033630
chr5:113464290-113464719
chr5:35462085-35463402
chr1:83502026-83503341
chr17:26062611-26062875
chr4:119807221-119807671
chr11:115469947-115470804
chr5:75557274-75557841
chr6:29668102-29669620
chr10:94716973-94717484
chr18:39719050-39719652
chr5:106849565-106850764
chr7:17622992-17624322
chr9:112135787-112138817
chr1:73989860-73991733
chr11:87391638-87392894
chr12:78600752-78602443
chr6:126551718-126552622
chr8:127108949-127110647
chr2:119664296-119664858
chr5:100537738-100538550
chr11:118222057-118222253
chr4:53328171-53328962
chr14:25779220-25780604
chr4:106520810-106521346
chr11:18645602-18655951
chr12:109305857-109306634
chr1:120760952-120761325
chr5:75579085-75580759
chr4:3617916-3618667
chr12:78695913-78697055
chr12:81090382-81091521
chr7:132330464-132330967
chr13:118554224-118555316
chr1:62907201-62907516
chr6:141322905-141323710
chr3:37298539-37299124
chr9:96605906-96606405
chr4:87296718-87297244
chr1:178869739-178870889
chr13:44596585-44597618
chr10:93879042-93879945
chr7:100258990-100259902
chr7:117917334-117917627
chr8:128558524-128560101
chr4:119549105-119549965
chr5:115188739-115189526
chr12:113828945-113829726
chr16:5183226-5184212
chr17:56433201-56434143
chr10:90129824-90130178
chr9:121994395-121995109
chr1:72456751-72457102
chr9:61966144-61967553
chr17:84771244-84772248
chr8:10977004-10979030
chr16:43130140-43131437
chr19:40539044-40541167
chr12:26876072-26877107
chr16:29657111-29659972
chr7:38173656-38174654
chr8:107841976-107842616
chr3:65474344-65474788
chr11:54828584-54830794
chr8:125012148-125012839
chr13:94948184-94949731
chr18:82687158-82688630
chr7:6729140-6729792
chr17:45413261-45414316
chr7:30191171-30192156
chr11:84380457-84380910
chr10:82139467-82139793
chr3:63945926-63947295
chr14:123279485-123279821
chr8:122996236-122996450
chr19:16359802-16360549
chr9:102199888-102200664
chr19:7427062-7427394
chr4:97663349-97664560
chr9:40140254-40140558
chr19:5909955-5910606
chr14:65754092-65754993
chr7:148617999-148621238
chr16:73035762-73036224
chr9:121384898-121385407
chr16:5184881-5186155
chr7:58475926-58477880
chr12:12293800-12295081
chr13:54925260-54926278
chr13:94280646-94281592
chr12:4006207-4007679
chr5:149509502-149509817
chr5:114128534-114129175
chr15:71939992-71941004
chr2:7094007-7095328
chr1:140464829-140466275
chr14:55476210-55476971
chr7:53357983-53360202
chr18:13864283-13866263
chr7:82436782-82437812
chr10:122154671-122155685
chr10:18245667-18246784
chr2:146081628-146088384
chr18:69658149-69663725
chr3:104390647-104390849
chr14:65973115-65974019
chr4:141170449-141171569
chr2:34533241-34534265
chr4:132853557-132856293
chr14:55957076-55958162
chr4:90955414-90958054
chr18:62004639-62005746
chr11:6868756-6869620
chr2:146119080-146119869
chr12:78839742-78841056
chr13:46115530-46115720
chr17:68951600-68952104
chr5:136961371-136962038
chr5:147533414-147534093
chr3:94414804-94416130
chr4:140197511-140198598
chr9:121956826-121958232
chr1:73135650-73136815
chr14:63034305-63036226
chr8:90199122-90201082
chr11:102498197-102499025
chr11:118342496-118343514
chr15:40900729-40901345
chr10:79093703-79095104
chr13:94943645-94944473
chr14:64745106-64746839
chr2:168073352-168074155
chr9:83381917-83382533
chr6:142886835-142888062
chr8:87232617-87233877
chr2:32677915-32680445
chr16:32153972-32154920
chr5:37290195-37290523
chr1:156830084-156832269
chr9:47115437-47116272
chr11:6414649-6415509
chr4:132501255-132503067
chr4:46128704-46129907
chr15:58619730-58620726
chr11:116009816-116011096
chr2:92266691-92268634
chr13:34248513-34248907
chr3:105513554-105515292
chr2:26428377-26430375
chr6:86430171-86430822
chr9:40959424-40960177
chr5:147236198-147238542
chr11:19838730-19840000
chr15:86193111-86195309
chr2:4947853-4948237
chr1:179613305-179614900
chr1:179388121-179389405
chr17:12788297-12789949
chr9:45599168-45601167
chr4:95743076-95743960
chr15:94832028-94832769
chr15:25844519-25846534
chr14:30977106-30977642
chr11:5324216-5325810
chr13:105792293-105793055
chr10:104945677-104946740
chr10:18123661-18125206
chr7:13511424-13512430
chr9:26812742-26814604
chr9:45546852-45548607
chr6:127129970-127132605
chr8:113179389-113180558
chr5:35480477-35481428
chr4:139720263-139721854
chr6:28764575-28765580
chr11:18922590-18923767
chr15:77912608-77914334
chr5:111426005-111426226
chr2:25273033-25274211
chr14:62960273-62962793
chr1:171392309-171393411
chr2:71811745-71812266
chr1:134965022-134966431
chr10:76735503-76736401
chr1:72446644-72447597
chr13:58577811-58578039
chr11:81580948-81582403
chr13:37600663-37601959
chr2:92774871-92775792
chr3:37297260-37297947
chr11:75739340-75740298
chr9:96728042-96729009
chr8:81777549-81778236
chr10:45030938-45031689
chr16:74055237-74055790
chr10:60825076-60825765
chr4:149364464-149366156
chr4:142388890-142390491
chr1:195142044-195142808
chr18:69750951-69759815
chr17:29036639-29036913
chr4:97267233-97269019
chr4:49053815-49055980
chr9:108816130-108817334
chr10:22466075-22467577
chr10:75464792-75465411
chr11:30060745-30061842
chr9:56586414-56586980
chr12:72224007-72224949
chr17:26179490-26181048
chr3:55596791-55598945
chr13:59635267-59636921
chr5:3394251-3396301
chr2:155728775-155729623
chr10:125507839-125508629
chr6:146978914-146979267
chr1:139514285-139514980
chr19:53332473-53335147
chr19:53149417-53151625
chr16:95152599-95154476
chr1:39829493-39831691
chr6:119028784-119030363
chr12:53724407-53725015
chr4:45753408-45754676
chr6:127082262-127082557
chr2:117975883-117976386
chr6:91058336-91058833
chr10:93098429-93099335
chr7:139906504-139907591
chr12:26752716-26753990
chr6:116333519-116333723
chr8:24144169-24145536
chr5:114173315-114174374
chr4:136205419-136206458
chr13:63626197-63627030
chr7:89475490-89476594
chr18:25673283-25674091
chr9:45415771-45417458
chr10:61210322-61210649
chr2:25118157-25119572
chr6:90309900-90310662
chr10:86234024-86235054
chr19:36751349-36752996
chr14:64795754-64797113
chr11:68057252-68058664
chr11:104133084-104134515
chr11:114036486-114037797
chr18:48016744-48018435
chr12:85132426-85134090
chr4:65963663-65964506
chr17:90459143-90460046
chr9:27803852-27804926
chr8:124457702-124460975
chr17:12169123-12172423
chr16:91896141-91897411
chr6:118674160-118676249
chr17:81200279-81201770
chr6:51682150-51683130
chr3:105214405-105215149
chr2:145805759-145808427
chr10:59247650-59248045
chr10:92723827-92724795
chr10:41651633-41652464
chr4:140669787-140670824
chr14:77655901-77658196
chr2:156894284-156896907
chr17:69059798-69060801
chr5:141800341-141801881
chr5:139396003-139397030
chr14:63007509-63009405
chr2:149562800-149564700
chr6:127389268-127390115
chr7:17532001-17533918
chr5:149420542-149421762
chr19:46521128-46522561
chr4:100045264-100046059
chr12:35748134-35748535
chr11:109181564-109182523
chr11:49751364-49753405
chr1:64365152-64365943
chr15:87165850-87166441
chr17:86754922-86755568
chr11:121669983-121670232
chr6:87571246-87571781
chr10:69168434-69172379
chr8:125046690-125048260
chr13:35333160-35333613
chr15:94479199-94479455
chr17:86750207-86750460
chr18:56858109-56859042
chr2:75763739-75764658
chr11:95354084-95355608
chr12:41225310-41226282
chr19:40423014-40423384
chr7:139997534-140001590
chr14:64333299-64334014
chr9:56401464-56402168
chr15:31247694-31249322
chr1:179575505-179576920
chr15:75696103-75697413
chr6:50734711-50735334
chr5:100746867-100747287
chr11:65216070-65216469
chr11:115143716-115144433
chr4:9566625-9567312
chr4:147730996-147732011
chr4:99646761-99647700
chr2:104091387-104092933
chr10:60717971-60718328
chr4:82176943-82180698
chr11:119982287-119983380
chr12:27503032-27503712
chr15:25625124-25626619
chr2:29085365-29086145
chr12:86777365-86777763
chr7:139444542-139446143
chr17:83947804-83948889
chr18:24561475-24562532
chr2:77999716-78000722
chr8:87337901-87339540
chr15:73440803-73441457
chr14:122623019-122627203
chr13:100138847-100139565
chr3:87942684-87943251
chr2:147911739-147912368
chr5:139886910-139887585
chr2:4275963-4276247
chr5:135006612-135007498
chr1:194203419-194205622
chr2:180551280-180551775
chr8:90143721-90145387
chr3:150956757-150957982
chr10:69205145-69208029
chr6:72580910-72581846
chr18:65099687-65101099
chr2:26002477-26004180
chr11:119633938-119634298
chr10:13555172-13557006
chr2:129370180-129370886
chr6:92575543-92576091
chr7:106812589-106813639
chr14:122799649-122806903
chr10:66546406-66548411
chr13:59653702-59654081
chr10:6930910-6931833
chr8:10144253-10144667
chr10:53455074-53455767
chr7:71056461-71057393
chr12:112935709-112937243
chr12:29633557-29635221
chr17:26825552-26827430
chr5:144231415-144231785
chr8:89758141-89758706
chr12:30033767-30034684
chr2:146125843-146128262
chr6:147666411-147667393
chr17:45766067-45767451
chr14:61773349-61774061
chr5:123421692-123422693
chr8:71404439-71405492
chr16:40059825-40061286
chr19:53433493-53435753
chr4:53410835-53411404
chr17:70835976-70836561
chr4:119899526-119899952
chr8:122675664-122676581
chr3:117452009-117453021
chr7:139944226-139946179
chr18:33669829-33670030
chr4:134147711-134149068
chr4:147427148-147428673
chr5:135020204-135020929
chr10:85779857-85780232
chr7:71095870-71096790
chr7:134848875-134849365
chr6:144129269-144129881
chr1:43373880-43375172
chr6:51009357-51010806
chr12:96976309-96977466
chr12:111748105-111749628
chr2:103432257-103433297
chr5:136964030-136964611
chr11:113127679-113128164
chr11:118188506-118189607
chr8:108847051-108847904
chr13:34818204-34818873
chr11:118617899-118622731
chr1:172594960-172595652
chr3:38197878-38199274
chr14:77164896-77165339
chr5:97729636-97730432
chr1:133313825-133315402
chr3:108131528-108131856
chr10:93095654-93096948
chr2:134651937-134653287
chr8:129258899-129260792
chr9:54381567-54382218
chr8:17663859-17665732
chr4:139489176-139489787
chr7:134151666-134153053
chr18:36101527-36101883
chr12:69700114-69701541
chr15:74732338-74733556
chr14:122757928-122759081
chr5:111487512-111488520
chr11:95361697-95363015
chr16:42357483-42357918
chr14:22488416-22489727
chr10:76264287-76265523
chr13:56204602-56206315
chr7:139977941-139978707
chr11:110339506-110340957
chr1:37413277-37413984
chr15:89012763-89013446
chr16:37617551-37618768
chr7:118731854-118732804
chr10:92657311-92658528
chr2:28763871-28765409
chr17:8323285-8324327
chr11:45267708-45269678
chr11:119707569-119709690
chr9:25312519-25313449
chr11:103095669-103097405
chr18:33359405-33361524
chr1:94004658-94006329
chr3:141766517-141767679
chr12:4008450-4009383
chr4:154260689-154262060
chr1:191041183-191043183
chr13:35593341-35594211
chr2:38427839-38428106
chr17:86649417-86650324
chr1:72459995-72461803
chr18:5603366-5604133
chr18:13948129-13949807
chr4:65876523-65877132
chr10:59065030-59065889
chr7:71601459-71602300
chr6:114811731-114812684
chr2:6789707-6798782
chr1:72217176-72218258
chr2:130459739-130460402
chr14:8720734-8722473
chr13:19310709-19312917
chr7:82472088-82474991
chr12:111698841-111699632
chr17:29847661-29848350
chr11:114545769-114548105
chr9:40344921-40348411
chr8:15004718-15005378
chr10:6933949-6936747
chr6:144102390-144104322
chr10:120092584-120092764
chr18:69760166-69762891
chr8:108843500-108844300
chr17:48226646-48227389
chr5:140086363-140090391
chr7:59045589-59047100
chr13:16736748-16738160
chr1:130662933-130663460
chr18:60923779-60925271
chr13:60623670-60625096
chr15:57685403-57686745
chr12:100485345-100486083
chr9:103055365-103056681
chr7:28100722-28101638
chr5:142985203-142986187
chr11:49747570-49749650
chr12:112925086-112926530
chr1:145491602-145494185
chr11:98194298-98195940
chr8:113001171-113001511
chr6:29213637-29214272
chr15:73380009-73380576
chr14:26367607-26368451
chr5:114168553-114169418
chr15:25635063-25635779
chr2:159581194-159582255
chr1:154892265-154892632
chr18:83825965-83827003
chr15:102361738-102363650
chr15:97502096-97503367
chr16:21880851-21882511
chr7:62999840-63000754
chr5:115399105-115399776
chr7:137852675-137854612
chr5:118515138-118516602
chr5:135159868-135161140
chr9:59044984-59046166
chr12:29768183-29768964
chr4:99681070-99681612
chr11:118600418-118602134
chr12:26555437-26557394
chr9:40152057-40155105
chr3:28281853-28283502
chr6:125416177-125419302
chr8:124553866-124555519
chr7:125909397-125910406
chr8:83395736-83396962
chr7:38177445-38178710
chr11:117740100-117740332
chr11:72047378-72048278
chr9:96430490-96431228
chr9:101858284-101858808
chr8:74866727-74867264
chr7:73885669-73887103
chr3:101158177-101158704
chr17:69101890-69103449
chr10:110428777-110429032
chr7:53417301-53418497
chr14:122825750-122826895
chr2:25640988-25641860
chr11:71798728-71800245
chr8:91103402-91104401
chr2:73307838-73308543
chr15:73190438-73192325
chr1:25880645-25882340
chr6:72203468-72205384
chr11:62465878-62466350
chr1:38506721-38508909
chr18:13464312-13465171
chr2:142263096-142264307
chr8:92895151-92895841
chr2:6982789-6985044
chr2:26012019-26013278
chr6:11543630-11544435
chr8:97508025-97511841
chr9:52748566-52750419
chr7:25213804-25215004
chr16:85128572-85129578
chr8:127019396-127020102
chr6:37663910-37664758
chr14:60456444-60457561
chr2:4393544-4394242
chr12:103540421-103542573
chr2:153417969-153418864
chr12:81104094-81104536
chr16:49721079-49722271
chr9:57932102-57933350
chr5:120685393-120686033
chr1:82216750-82218207
chr11:63802556-63802974
chr10:94602119-94602785
chr4:126869602-126871461
chr3:55331621-55332124
chr2:145050889-145051473
chr1:93995779-93997135
chr11:17252437-17252985
chr6:8371938-8372445
chr9:101839992-101841821
chr4:139664628-139665636
chr5:36239210-36240374
chr5:4484798-4486894
chr12:12722288-12722693
chr1:51035403-51038884
chr18:14419374-14420057
chr8:90334761-90337138
chr17:45731864-45734623
chr4:97586955-97587742
chr1:38687702-38688355
chr4:139801561-139802695
chr2:112431570-112432060
chr12:78778752-78779506
chr6:134157710-134158418
chr15:95793929-95794989
chr1:194562523-194563441
chr13:12018934-12019122
chr17:45721363-45722925
chr12:27465939-27467216
chr9:75445592-75448571
chr11:105795959-105798082
chr11:118612839-118614145
chr12:99073781-99075872
chr16:20236693-20238158
chr7:39003483-39004453
chr5:125628424-125629819
