# Supplementary material for: Temporal analysis of enhancers during mouse cerebellar development reveals dynamic and novel regulatory functions
Source: eLife. 2022 Aug 9;11:e74207. doi: 10.7554/eLife.74207 (PMC9398453; doi:10.7554/eLife.74207)
Supplement: Supplementary file 3. — Map%: Percentage reads mapped, Filt%: percentage of reads filtered, Dup%: duplication rate, ReadL: read length, FragL:, FRiP%: fraction of reads in peaks, RSC: relative strand correlation. [file elife-74207-supp3.xlsx]

## Sheet: QC_metrics_H3K27ac
Sample	Reads	Map%	Filt%	Dup%	ReadL	FragL	FRiP%	RSC
E12_rep1_H3K27ac	29861758	100	9.83	0	50	172	22.6	1.32
E12_rep2_H3K27ac	32677377	100	9.83	0	50	172	14.9	1.26
P0_rep1_H3K27ac	28008998	100	14.8	0	50	153	5.02	0.97
P0_rep2_H3K27ac	25788404	100	14.2	0	50	162	5.78	1
P9_rep1_H3K27ac	25887614	100	13.4	0	50	172	7	1.18
P9_rep2_H3K27ac	41565933	100	12.6	0	50	161	5.26	1.26
E12_rep1_H3K4me1	34980300	100	8.26	0	50	173	13	1.22
E12_rep2_H3K4me1	44559566	100	10.7	0	50	161	2.23	1.29
P0_rep1_H3K4me1	36560960	100	9.17	0	50	174	16.9	1.18
P0_rep2_H3K4me1	39296095	100	8.91	0	50	172	17	1.23
P9_rep1_H3K4me1	41867868	100	9.12	0	50	162	8.19	1.32
P9_rep2_H3K4me1	41452025	100	9.65	0	50	162	15	1.32
