# Supplementary material for: Temporal analysis of enhancers during mouse cerebellar development reveals dynamic and novel regulatory functions
Source: eLife. 2022 Aug 9;11:e74207. doi: 10.7554/eLife.74207 (PMC9398453; doi:10.7554/eLife.74207)
Supplement: Supplementary file 4. — This table contains the motif symbol, the TF in the JASPAR database that best matches the enriched motif, protein family of the best match TF, percentage of robust cerebellar enhancers and background sequences containing each motif. [file elife-74207-supp4.xlsx]

## Sheet: Sheet1
Motif	P-value	Best Match	Protein Family	% of Targets	% of Background
	1e-295	Sox4	Sry-related HMB box	0.6065	0.3357
	1e-85	Lhx2	LIM homeodomain	0.3436	0.2151
	1e-61	Rfx4	Regulatory factor X	0.1051	0.045
	1e-45	Ascl1	Basic helix-loop-helix (BHLHE)	0.4226	0.3206
	1e-36	Meis2	Three amino acid loop extension (TALE)	0.187	0.1205
	1e-34	Pou3f1	POU class homeodomain	0.1726	0.11
	1e-25	Pax3	Paired box factors	0.2507	0.1864
	1e-17	Neurog2	Basic helix-loop-helix (BHLHE)	0.3673	0.3066
	1e-203	Neurod1	Basic helix-loop-helix (BHLHE)	0.4564	0.1149
	1e-38	Nfib	Nuclear Factor I	0.6866	0.5059
	1e-20	Nf1	Ras GTPase-activating proteins	0.2003	0.1103
	1e-17	Tcf4	Basic helix-loop-helix (BHLHE)	0.1288	0.063
	1e-15	Smad4	SMAD	0.1524	0.0832
	1e-13	Pax6	Paired box factors	0.4894	0.3848
	1e-13	Sox3	Sox	0.3307	0.2387

## Sheet: Sheet2
Motif	P-value	Best Match/Details	Protein Family	% of Targets	% of Background
	1e-203	Neurod1	Basic helix-loop-helix (BHLHE)	0.4564	0.1149
	1e-38	Nfib	Nuclear Factor I	0.6866	0.5059
	1e-20	Nf1	Neurofibromin	0.2003	0.1103
	1e-17	Tcf4	Basic helix-loop-helix (BHLHE)	0.1288	0.063
	1e-15	Smad4	Smad	0.1524	0.0832
	1e-13	Pax6	Paired box factors	0.4894	0.3848
	1e-13	Sox3	Sox	0.3307	0.2387
