# Supplementary material for: Temporal analysis of enhancers during mouse cerebellar development reveals dynamic and novel regulatory functions
Source: eLife. 2022 Aug 9;11:e74207. doi: 10.7554/eLife.74207 (PMC9398453; doi:10.7554/eLife.74207)
Supplement: Supplementary file 5. — This file contains coordinates of the enhancer, gene target symbol, and Pearson correlation coefficient. [file elife-74207-supp5.xlsx]

## Sheet: H3K27ac_single_gene_target
Robust Cerebellar Enhancer	Gene Target	Pearson Correlation Coefficient
chr1:100086541-100088852	Ppip5k2	0.35
chr1:108374296-108375334	Kdsr	0.72
chr1:11016963-11017363	Arfgef1	1
chr1:120672512-120674026	Mki67ip	0.96
chr1:120760952-120761325	Gli2	0.96
chr1:120806969-120808278	Mki67ip	0.99
chr1:120812806-120813452	2900060B14Rik	0.92
chr1:120878900-120879779	Clasp1	0.99
chr1:120929894-120931307	Mki67ip	0.99
chr1:121225089-121226791	Mki67ip	0.98
chr1:122510201-122512159	2610027F03Rik	1
chr1:123073471-123076944	2610027F03Rik	1
chr1:127892768-127893890	Actr3	0.95
chr1:128578083-128578736	Nckap5	1
chr1:128579382-128582050	Actr3	0.99
chr1:128634041-128635110	Actr3	0.98
chr1:128641927-128642439	Actr3	0.98
chr1:128761546-128762750	Nckap5	1
chr1:129433176-129435950	Zranb3	0.99
chr1:129801225-129801751	Zranb3	1
chr1:129886204-129887631	Zranb3	0.94
chr1:130255168-130256222	Cxcr4	1
chr1:130296510-130298095	Mcm6	0.99
chr1:130353605-130354076	Dars	0.91
chr1:130481511-130484818	Mcm6	0.98
chr1:130565386-130566619	Cxcr4	0.97
chr1:130581739-130582659	Cxcr4	0.93
chr1:130583562-130584386	Cxcr4	0.96
chr1:130662933-130663460	Dars	0.23
chr1:130700044-130700517	Cxcr4	0.99
chr1:130702062-130702723	Cxcr4	0.98
chr1:133313825-133315402	Slc41a1	0.97
chr1:133867020-133869793	Rbbp5	0.99
chr1:133903843-133905037	Nuak2	0.99
chr1:134086230-134088977	Rbbp5	0.99
chr1:134096634-134098055	Rbbp5	0.99
chr1:134178354-134180333	Nuak2	1
chr1:134214470-134216939	Nuak2	1
chr1:134217740-134220594	Rbbp5	0.99
chr1:134230009-134230882	Nuak2	1
chr1:134262412-134263227	Rbbp5	1
chr1:134267471-134270248	Nuak2	0.99
chr1:134271034-134272504	Rbbp5	1
chr1:134434134-134434830	Tmcc2	0.95
chr1:134454038-134456353	Rbbp5	0.99
chr1:134457374-134459791	Rbbp5	0.98
chr1:134465698-134471289	Nucks1	0.92
chr1:134478145-134479895	Rbbp5	1
chr1:134555348-134558223	Rbbp5	1
chr1:134590368-134593083	Rbbp5	1
chr1:134603549-134604028	Rbbp5	0.95
chr1:134605655-134606844	Rbbp5	0.98
chr1:134628780-134629397	Rbbp5	1
chr1:134637587-134638320	Rbbp5	0.99
chr1:134662617-134662997	Nuak2	0.95
chr1:134818648-134819438	Nuak2	1
chr1:134947033-134947327	Sox13	0.98
chr1:134965022-134966431	Mdm4	0.51
chr1:134975827-134977674	Sox13	1
chr1:135077664-135080367	Sox13	0.98
chr1:135083789-135085798	Snrpe	1
chr1:135091870-135093929	Sox13	1
chr1:135096105-135097039	Sox13	0.99
chr1:135105717-135107653	Sox13	0.98
chr1:135111751-135114643	Sox13	0.74
chr1:135119262-135120560	Sox13	0.99
chr1:135164370-135165331	Ppp1r15b	1
chr1:135208609-135208875	Sox13	1
chr1:135282358-135283336	Sox13	1
chr1:135293899-135295893	Sox13	1
chr1:135314770-135315687	Sox13	1
chr1:135330736-135331597	Sox13	1
chr1:135334630-135335122	Sox13	1
chr1:135721767-135722780	Btg2	1
chr1:135783046-135784223	Btg2	0.99
chr1:135813829-135814786	Btg2	0.97
chr1:135957208-135962967	Btg2	1
chr1:135966724-135968940	Btg2	1
chr1:135989420-135990270	Btg2	1
chr1:135991991-135996367	Btg2	1
chr1:136170019-136173357	Adipor1	1
chr1:136203809-136204619	Tmem183a	0.96
chr1:136232285-136233038	Adipor1	0.99
chr1:136594969-136596921	Ppp1r12b	0.65
chr1:136605426-136606306	Ube2t	0.88
chr1:136609479-136611359	Ube2t	0.8
chr1:136692820-136693084	Ppp1r12b	0.68
chr1:137468878-137469563	Ipo9	0.93
chr1:137499228-137500398	Ipo9	0.96
chr1:137512226-137513087	Ipo9	0.8
chr1:137532106-137533244	Rnpep	0.98
chr1:137542109-137543705	Ipo9	0.95
chr1:137567269-137567800	Ipo9	0.89
chr1:137572856-137574430	Timm17a	0.8
chr1:137576335-137579595	Gpr37l1	0.99
chr1:137583462-137585096	Ipo9	0.93
chr1:137957629-137958354	Camsap2	0.1
chr1:137999070-138001318	Tmem9	1
chr1:140897002-140898140	Lhx9	0.99
chr1:145491602-145494185	B3galt2	0.17
chr1:153789596-153792979	1700025G04Rik	1
chr1:153830386-153832190	1700025G04Rik	1
chr1:153851115-153853049	1700025G04Rik	1
chr1:153916698-153917918	Rnf2	1
chr1:153923254-153925075	1700025G04Rik	1
chr1:153929309-153930350	1700025G04Rik	1
chr1:154011689-154013599	Rnf2	1
chr1:154639476-154641352	Arpc5	0.88
chr1:154661581-154665555	Arpc5	0.86
chr1:154892265-154892632	Lamc1	1
chr1:154901261-154901807	Arpc5	0.86
chr1:155038536-155039771	Arpc5	0.94
chr1:155488420-155489876	Rgs16	1
chr1:155500264-155500807	Rgs16	1
chr1:155507648-155509077	Dhx9	1
chr1:155511637-155513085	Rgs16	1
chr1:155550127-155552622	Rgs16	1
chr1:155584247-155585077	Dhx9	0.99
chr1:156898524-156900621	Ier5	0.99
chr1:156909838-156910430	Ier5	0.27
chr1:156924372-156924981	Stx6	0.92
chr1:156929196-156931499	Ier5	0.97
chr1:157059103-157060873	Stx6	0.94
chr1:157069190-157069743	Stx6	0.99
chr1:157075973-157078249	Ier5	0.92
chr1:157079336-157082903	Ier5	0.99
chr1:157636973-157637977	Qsox1	0.99
chr1:158543888-158544569	Soat1	0.98
chr1:158574330-158576470	Tor1aip1	0.89
chr1:158684271-158685462	Ralgps2	0.24
chr1:158711484-158712270	Gm15428	0.33
chr1:158719583-158720772	Ralgps2	0.3
chr1:158919374-158920882	Ralgps2	0.28
chr1:158984208-158986635	Ralgps2	0.2
chr1:159173849-159174889	2810025M15Rik	1
chr1:159369773-159371191	2810025M15Rik	0.99
chr1:159376840-159377631	2810025M15Rik	1
chr1:161343064-161344455	Rfwd2	0.99
chr1:161510823-161511310	Tnr	1
chr1:161544433-161546095	Rfwd2	1
chr1:161600854-161601024	Rfwd2	1
chr1:161831153-161832140	Rfwd2	1
chr1:162216704-162217733	Mrps14	0.3
chr1:162464944-162466115	Mrps14	0.91
chr1:163179705-163181276	Prdx6	1
chr1:163899352-163899733	Prdx6	0.97
chr1:164038483-164038858	Prrc2c	0.78
chr1:164761839-164762969	BC055324	1
chr1:167211214-167212951	Pou2f1	0.99
chr1:167744211-167745608	Pou2f1	0.99
chr1:167764293-167764791	Pou2f1	0.97
chr1:167864709-167866042	Pou2f1	0.99
chr1:167973934-167974260	Pou2f1	0.96
chr1:168184069-168185049	Pou2f1	0.99
chr1:168209728-168211554	Pou2f1	0.98
chr1:168212532-168214002	Pou2f1	0.99
chr1:168852669-168853560	Uck2	0.98
chr1:168856091-168857292	Pogk	0.95
chr1:168942646-168944484	Uck2	0.97
chr1:169044892-169045717	Uck2	0.93
chr1:169046255-169047002	Uck2	0.99
chr1:169111580-169113238	Uck2	0.98
chr1:169169852-169170560	Tmco1	0.99
chr1:169219367-169220235	Uck2	0.94
chr1:170093546-170095189	Pbx1	0.91
chr1:170170777-170172578	Pbx1	0.87
chr1:170205648-170207448	Pbx1	0.79
chr1:170214175-170215162	Pbx1	0.55
chr1:170216307-170222385	Pbx1	0.81
chr1:170238234-170239879	Pbx1	0.86
chr1:170271332-170273603	Pbx1	0.85
chr1:170278151-170279128	Pbx1	0.79
chr1:170285153-170289868	Pbx1	0.86
chr1:170313809-170315336	Pbx1	0.85
chr1:170347150-170348561	Pbx1	0.77
chr1:170403231-170404437	Pbx1	0.88
chr1:17049365-17050763	Jph1	0.98
chr1:172297004-172297507	Uap1	0.88
chr1:172353967-172354870	Uap1	0.89
chr1:172585485-172587012	Uap1	0.98
chr1:172587781-172588556	Uap1	0.89
chr1:172594960-172595652	Atf6	0.87
chr1:172604438-172604772	Uap1	1
chr1:173123071-173124284	Apoa2	0.99
chr1:173180503-173181628	Apoa2	0.99
chr1:173944682-173948259	Vangl2	1
chr1:173976870-173980625	Vangl2	0.99
chr1:173982523-173984740	Vangl2	1
chr1:173994228-173996045	Pex19	0.95
chr1:174001109-174002538	Gm15431	0.99
chr1:174078278-174079794	Vangl2	0.98
chr1:174191232-174192110	Vangl2	0.99
chr1:174239585-174240945	Gm15431	0.87
chr1:174249476-174250797	Igsf8	0.99
chr1:174412376-174413748	Igsf9	1
chr1:174415767-174417072	Igsf9	1
chr1:175272119-175273102	Igsf9	0.95
chr1:175273809-175274618	Igsf9	0.91
chr1:175288660-175290611	Cadm3	0.88
chr1:178685634-178687023	Zfp238	0.99
chr1:178809627-178812336	Akt3	0.98
chr1:178858223-178865558	Zfp238	0.98
chr1:178869739-178870889	Zfp238	1
chr1:178875606-178878297	Zfp238	0.97
chr1:178919205-178919975	Sdccag8	0.99
chr1:178922663-178929815	Akt3	0.97
chr1:179078589-179081665	Akt3	0.85
chr1:179268883-179269387	Akt3	1
chr1:179296171-179297374	Akt3	0.77
chr1:179379971-179380692	Akt3	0.99
chr1:179381351-179382273	Akt3	0.69
chr1:179388121-179389405	Zfp238	0.89
chr1:179492191-179492736	Akt3	1
chr1:179502705-179504803	Zfp238	0.97
chr1:179570412-179570980	Sdccag8	1
chr1:179575505-179576920	Zfp238	1
chr1:179613305-179614900	Zfp238	0.98
chr1:182242474-182244119	Parp1	0.96
chr1:182295303-182296964	H3f3a	1
chr1:182693093-182694589	H3f3a	0.87
chr1:182698081-182699188	Lin9	0.95
chr1:183453789-183454377	Lbr	0.79
chr1:183481788-183483482	Lbr	0.9
chr1:183806469-183809087	Degs1	0.98
chr1:184307023-184307253	Capn2	1
chr1:184798492-184800193	Enah	0.93
chr1:184848557-184850018	Enah	0.96
chr1:184851872-184853527	Enah	0.96
chr1:184889434-184890341	Enah	0.9
chr1:187265639-187266345	Bpnt1	0.97
chr1:188378403-188379864	Tgfb2	0.3
chr1:189686227-189687260	Gpatch2	0.97
chr1:190886993-190891325	Kctd3	1
chr1:190903737-190904367	Kctd3	0.97
chr1:191011844-191012348	Gm3837	0.54
chr1:191032631-191033985	Gm3837	0.76
chr1:191041183-191043183	Kctd3	1
chr1:191961291-191963554	Cenpf	1
chr1:192505699-192507009	Cenpf	1
chr1:192551439-192553679	Cenpf	1
chr1:192587470-192588247	Prox1	0.92
chr1:192772555-192773352	Tatdn3	0.82
chr1:193047852-193048766	Ints7	0.91
chr1:193260394-193261124	Angel2	0.97
chr1:193285596-193286562	Nsl1	0.99
chr1:193640045-193642543	Vash2	1
chr1:194203419-194205622	Rcor3	0.54
chr1:194250960-194251976	Sertad4	1
chr1:194277850-194278096	Rcor3	0.75
chr1:194367438-194369040	Sertad4	1
chr1:194381450-194383332	Sertad4	0.47
chr1:194562523-194563441	Rcor3	0.24
chr1:194581380-194582596	Sertad4	0.98
chr1:194660462-194661579	Sertad4	0.98
chr1:194677129-194678751	Sertad4	0.98
chr1:195020443-195021442	Cd34	0.99
chr1:195023172-195024742	Cd34	0.99
chr1:195098529-195099700	Plxna2	0.94
chr1:195131392-195132613	Plxna2	0.83
chr1:195142044-195142808	Cd34	1
chr1:195215086-195216977	Plxna2	0.93
chr1:195259571-195260975	Plxna2	0.89
chr1:195275508-195276653	Plxna2	0.95
chr1:195528852-195529202	Plxna2	0.93
chr1:195558340-195558717	Plxna2	0.99
chr1:195814796-195816868	Plxna2	0.96
chr1:195860285-195861057	Plxna2	0.93
chr1:195986870-195988046	Plxna2	0.76
chr1:196034316-196035507	Plxna2	0.97
chr1:196049459-196049887	Plxna2	0.92
chr1:196052603-196053177	Plxna2	0.98
chr1:196448720-196451154	Plxna2	0.95
chr1:196454891-196456071	Plxna2	0.95
chr1:196463333-196463911	Plxna2	0.91
chr1:196488268-196489908	Plxna2	0.86
chr1:196546874-196548498	Plxna2	0.91
chr1:196802584-196803073	Plxna2	0.87
chr1:20291664-20293718	Tfap2b	0.98
chr1:21069515-21069902	Mcm3	0.98
chr1:22252102-22252810	Kcnq5	0.95
chr1:24229251-24230683	Ogfrl1	0.96
chr1:24620784-24621995	Bai3	0.92
chr1:25880645-25882340	Lmbrd1	0.98
chr1:33988338-33989288	Imp4	1
chr1:34062276-34063443	Imp4	0.92
chr1:34239150-34241755	Imp4	0.99
chr1:35750960-35752583	Uggt1	0.98
chr1:35754218-35755187	Uggt1	0.99
chr1:36121233-36122341	Uggt1	0.96
chr1:36133587-36135594	Uggt1	0.92
chr1:36144473-36146448	Uggt1	0.9
chr1:36636957-36638015	Tsga10	1
chr1:37178304-37180611	Tsga10	0.98
chr1:37413277-37413984	Actr1b	1
chr1:38255237-38256015	Aff3	0.45
chr1:38275071-38275857	Aff3	0.87
chr1:38320420-38320829	Aff3	0.58
chr1:38467241-38468040	Aff3	0.24
chr1:38473931-38475219	Aff3	0.31
chr1:38495140-38496451	Aff3	1
chr1:38506721-38508909	Chst10	0.79
chr1:38545337-38546231	Aff3	0.27
chr1:38617919-38620347	Aff3	0.23
chr1:38621622-38623972	Aff3	0.29
chr1:38662957-38664194	Aff3	0.4
chr1:38687702-38688355	Aff3	0.91
chr1:38933667-38934170	Aff3	0.79
chr1:39757692-39759507	Map4k4	0.92
chr1:39992513-39994072	Map4k4	0.73
chr1:39999622-39999892	Map4k4	0.99
chr1:40001391-40002114	Map4k4	0.99
chr1:40003046-40005882	Map4k4	0.82
chr1:41214173-41215464	2610017I09Rik	1
chr1:41944672-41946295	2610017I09Rik	1
chr1:41946937-41949502	AI597479	1
chr1:42299448-42301444	2610017I09Rik	1
chr1:42314278-42319749	Pou3f3	1
chr1:42455426-42455984	2610017I09Rik	1
chr1:42547790-42549055	Pou3f3	1
chr1:42685011-42685910	AI597479	0.99
chr1:42763805-42765961	2610017I09Rik	1
chr1:42766097-42767181	2610017I09Rik	0.87
chr1:42769873-42771466	2610017I09Rik	1
chr1:42933008-42935648	2610017I09Rik	1
chr1:42945121-42947196	Pou3f3	1
chr1:43373880-43375172	Nck2	0.79
chr1:43751704-43752416	Nck2	0.92
chr1:51035403-51038884	Obfc2a	0.76
chr1:51673964-51674982	Obfc2a	0.62
chr1:51944506-51945526	Myo1b	0.94
chr1:58052457-58053169	Sgol2	0.99
chr1:59368521-59370312	Clk1	1
chr1:59462089-59462790	Ndufb3	1
chr1:59572296-59574529	Orc2	1
chr1:59591758-59592989	Sumo1	1
chr1:59623477-59625106	Ndufb3	1
chr1:59631150-59631790	Nif3l1	0.99
chr1:60907613-60908965	Gm11575	0.74
chr1:63620372-63621388	Fastkd2	0.99
chr1:63866495-63867848	Creb1	1
chr1:64040525-64041824	Zdbf2	1
chr1:64045891-64046349	Ndufs1	1
chr1:64270419-64270968	Creb1	1
chr1:64272538-64273482	Creb1	0.64
chr1:64365152-64365943	Ndufs1	1
chr1:66267414-66268690	Acadl	0.94
chr1:66366623-66370870	Rpe	0.8
chr1:6750276-6751856	Rb1cc1	0.56
chr1:69070991-69072081	Cps1	0.99
chr1:71719958-71720611	Atic	0.94
chr1:72217176-72218258	Fn1	0.51
chr1:72332407-72334229	Xrcc5	0.99
chr1:72446644-72447597	Smarcal1	0.76
chr1:72456751-72457102	Smarcal1	0.45
chr1:72459995-72461803	Smarcal1	0.92
chr1:72465756-72465983	Smarcal1	0.91
chr1:72501381-72503508	Smarcal1	1
chr1:72639660-72640524	Rpl37a	1
chr1:72827930-72828276	Xrcc5	0.72
chr1:72852274-72853141	Xrcc5	1
chr1:73101573-73102561	Smarcal1	0.96
chr1:73121869-73122782	Smarcal1	0.78
chr1:73135650-73136815	Smarcal1	0.54
chr1:73687112-73687503	Xrcc5	0.93
chr1:73689056-73689364	Xrcc5	1
chr1:73989860-73991733	Igfbp5	0.58
chr1:74157529-74158543	Xrcc5	0.98
chr1:74897989-74898555	1810031K17Rik	0.97
chr1:75285697-75287084	1810031K17Rik	0.99
chr1:75439386-75442875	1810031K17Rik	0.99
chr1:75775088-75775962	Epha4	0.055
chr1:76025260-76026544	Epha4	0.03
chr1:76486670-76488396	Epha4	0.082
chr1:77491578-77494428	Epha4	0.05
chr1:77497924-77500029	Epha4	0.095
chr1:78135036-78141822	Pax3	1
chr1:78154136-78156780	Pax3	0.99
chr1:78163053-78170877	Pax3	0.99
chr1:78171559-78172273	Pax3	0.96
chr1:78177863-78179894	Pax3	0.93
chr1:78197892-78198751	Pax3	0.95
chr1:79397716-79398445	Acsl3	0.49
chr1:81589640-81591957	Rhbdd1	0.45
chr1:82278908-82281336	Rhbdd1	0.55
chr1:82282758-82283285	Rhbdd1	0.59
chr1:82313254-82313646	Rhbdd1	0.46
chr1:82316370-82317684	Rhbdd1	1
chr1:82381712-82383029	Rhbdd1	0.8
chr1:83447373-83448551	Mff	0.96
chr1:83502026-83503341	Mff	1
chr1:87791204-87792654	Cab39	0.83
chr1:87824441-87825596	Cab39	0.85
chr1:87928662-87929228	Psmd1	0.99
chr1:88321108-88322366	Dis3l2	1
chr1:88337057-88339770	Dis3l2	0.99
chr1:88398755-88403105	Dis3l2	0.97
chr1:88421484-88422851	Dis3l2	0.99
chr1:88530150-88531050	Dis3l2	0.99
chr1:88932175-88933003	Dis3l2	0.93
chr1:89123554-89124792	Dgkd	0.99
chr1:90464921-90466184	Arl4c	0.62
chr1:91337578-91338580	Agap1	0.8
chr1:91340187-91340779	Agap1	0.32
chr1:91362952-91364691	Agap1	0.73
chr1:91444516-91447941	Agap1	0.73
chr1:91460996-91461979	Agap1	0.82
chr1:91472977-91473902	Agap1	0.71
chr1:91483883-91484149	Agap1	0.78
chr1:92101487-92102073	Cxcr7	0.47
chr1:92104590-92106594	Cxcr7	0.27
chr1:92871199-92874012	Ilkap	0.99
chr1:93496785-93498107	Myeov2	1
chr1:93995779-93997135	Myeov2	0.98
chr1:94004658-94006329	Ramp1	0.97
chr1:94108523-94109341	Ilkap	1
chr1:94120425-94121680	Ilkap	1
chr1:94293973-94294961	Ilkap	1
chr1:95582437-95583521	Ppp1r7	0.87
chr1:95931691-95932032	St8sia4	0.5
chr1:9638755-9639950	Vcpip1	1
chr1:9737494-9738436	Vcpip1	0.95
chr1:99944290-99946267	Ppip5k2	0.64
chr10:104945677-104946740	Tmtc2	0.83
chr10:105551060-105552032	Ppfia2	0.31
chr10:10869285-10870007	Shprh	0.87
chr10:110368391-110369359	Csrp2	0.97
chr10:110428777-110429032	Zdhhc17	0.93
chr10:110858823-110859270	Nap1l1	0.98
chr10:111272613-111273839	Nap1l1	0.92
chr10:115798897-115800199	Kcnmb4	0.99
chr10:115971468-115972636	Cnot2	0.6
chr10:116307420-116309339	Kcnmb4	1
chr10:117342829-117343289	Nup107	0.59
chr10:118076265-118079290	Dyrk2	0.7
chr10:118257033-118258168	Cand1	0.45
chr10:119709040-119709420	Hmga2	1
chr10:119853641-119855296	Hmga2	0.98
chr10:120092584-120092764	Tbc1d30	0.99
chr10:120144154-120145176	Hmga2	0.99
chr10:120319557-120320630	Hmga2	0.98
chr10:120643097-120643891	Llph	0.98
chr10:120856575-120857718	Tmbim4	1
chr10:120859464-120861781	Gns	0.99
chr10:120869403-120870706	Rassf3	1
chr10:120904135-120904692	Tbk1	0.98
chr10:120942590-120942957	Gns	0.94
chr10:120943610-120944462	Tbk1	0.97
chr10:122141375-122144262	Ppm1h	0.8
chr10:122152708-122153494	Ppm1h	0.12
chr10:122154671-122155685	Ppm1h	0.49
chr10:122185264-122187942	Ppm1h	0.83
chr10:122320141-122322357	Mon2	1
chr10:122323059-122325398	Mon2	1
chr10:122367250-122369881	Mon2	1
chr10:122400328-122401798	Mon2	0.99
chr10:125405007-125406636	Lrig3	0.43
chr10:125507839-125508629	Lrig3	0.95
chr10:126393952-126394885	Mettl1	1
chr10:126703428-126704602	Zbtb39	1
chr10:126817038-126818567	Prim1	0.99
chr10:126945981-126951150	Tsfm	0.99
chr10:126979309-126980068	Naca	1
chr10:127834719-127835604	Rab5b	1
chr10:128082272-128083686	Cnpy2	1
chr10:12827420-12829148	Plagl1	0.99
chr10:128325753-128327241	Cnpy2	1
chr10:128327879-128330309	Baz2a	1
chr10:12833964-12835580	Plagl1	1
chr10:128349770-128350875	Atp5b	0.98
chr10:12836895-12838896	Plagl1	1
chr10:128375373-128376468	Neurod4	0.99
chr10:13151489-13152272	Plagl1	1
chr10:13458997-13460360	Hivep2	0.95
chr10:13555172-13557006	Hivep2	1
chr10:13702667-13703241	Adat2	0.35
chr10:13801708-13802958	Hivep2	0.69
chr10:13915730-13916269	Hivep2	0.25
chr10:16741933-16742397	3110003A17Rik	0.93
chr10:16815037-16816146	3110003A17Rik	0.56
chr10:17050474-17053743	3110003A17Rik	1
chr10:17197771-17200008	3110003A17Rik	1
chr10:17350933-17352593	Reps1	0.99
chr10:17546498-17548347	Txlnb	1
chr10:18928134-18928379	Olig3	1
chr10:19889934-19890870	Gm6251	0.79
chr10:20004604-20006974	Gm6251	0.76
chr10:21324754-21325948	Sgk1	0.98
chr10:22311251-22312993	Tbpl1	0.91
chr10:22378375-22379450	Tbpl1	0.8
chr10:22466075-22467577	1110021L09Rik	0.14
chr10:24126889-24128368	Ctgf	0.73
chr10:24830940-24833376	Med23	0.56
chr10:39040467-39041078	Tube1	0.93
chr10:39181263-39182853	Tube1	0.95
chr10:39203936-39205730	Tube1	1
chr10:39259718-39262766	Tube1	0.99
chr10:39271003-39273585	Tube1	0.99
chr10:39277910-39279536	Tube1	0.99
chr10:39290282-39293187	Tube1	0.99
chr10:39306070-39309238	Tube1	0.99
chr10:39378700-39380485	Tube1	0.93
chr10:39394544-39395241	Tube1	0.95
chr10:40090853-40092228	Cdk19	0.94
chr10:40358779-40359404	Cdc40	0.95
chr10:41651633-41652464	Foxo3	0.91
chr10:41654430-41655258	Cep57l1	0.98
chr10:41791064-41791912	Cep57l1	1
chr10:41809280-41810090	Cep57l1	0.93
chr10:41838316-41839336	Foxo3	0.8
chr10:42579207-42580732	Sec63	0.5
chr10:42762883-42764493	Sec63	0.52
chr10:42803500-42804119	Sec63	0.49
chr10:42823459-42824258	Sec63	0.48
chr10:42825613-42826698	Sec63	0.57
chr10:42831927-42832870	Sec63	0.64
chr10:43027598-43028642	Sec63	0.61
chr10:43051167-43052725	Sec63	0.62
chr10:43068882-43070030	Sec63	0.56
chr10:43246986-43248198	Sec63	0.54
chr10:43442525-43443694	Cd24a	1
chr10:43462228-43463330	Cd24a	0.97
chr10:44716987-44718436	Prep	0.99
chr10:44719867-44720783	Prep	0.97
chr10:44866770-44867723	Prep	0.99
chr10:52597010-52597709	Asf1a	0.78
chr10:52747987-52748903	Asf1a	0.79
chr10:53118136-53118968	Asf1a	0.96
chr10:53154872-53155959	Gm9766	0.67
chr10:53455074-53455767	Fam184a	0.71
chr10:58412401-58413479	P4ha1	1
chr10:58552654-58554790	Ranbp2	0.68
chr10:59065030-59065889	Cbara1	0.63
chr10:59247650-59248045	Cbara1	0.91
chr10:59342398-59343254	Ranbp2	1
chr10:59359949-59363473	Ranbp2	1
chr10:5957673-5960105	Fbxo5	1
chr10:60194393-60195795	Slc29a3	0.89
chr10:60278134-60279109	Slc29a3	0.86
chr10:60282925-60284354	Unc5b	0.98
chr10:60717971-60718328	Tbata	0.98
chr10:60825076-60825765	Tbata	0.93
chr10:61210322-61210649	Tspan15	1
chr10:62149744-62150646	Ccar1	0.98
chr10:6274165-6277658	Akap12	0.98
chr10:6292659-6293544	Akap12	0.55
chr10:66382272-66385021	Reep3	0.48
chr10:66465372-66467754	Reep3	0.42
chr10:66528235-66529582	Reep3	0.58
chr10:66546406-66548411	Jmjd1c	0.55
chr10:67568640-67570408	Arid5b	0.82
chr10:67599224-67599679	Arid5b	0.99
chr10:68003085-68004421	Arid5b	0.97
chr10:68318307-68318776	Arid5b	0.96
chr10:68674792-68676570	Arid5b	0.9
chr10:68815169-68815636	Ank3	0.98
chr10:69097986-69099372	Cdk1	1
chr10:69153277-69153968	Cdk1	0.63
chr10:69158646-69159291	Phyhipl	0.98
chr10:69168434-69172379	Phyhipl	0.81
chr10:69191547-69194842	Phyhipl	0.83
chr10:69205145-69208029	Phyhipl	0.6
chr10:69258840-69259495	Phyhipl	1
chr10:6930910-6931833	Akap12	0.92
chr10:6933949-6936747	Akap12	0.74
chr10:69557698-69558245	Tfam	1
chr10:69581942-69584162	Cdk1	1
chr10:69601341-69603137	Cdk1	1
chr10:69645882-69646382	Cdk1	0.69
chr10:69667017-69668135	Phyhipl	1
chr10:69947222-69948446	Tfam	0.98
chr10:69982555-69983651	Cdk1	0.98
chr10:70411840-70413308	Cdk1	1
chr10:70414484-70415410	Cdk1	1
chr10:70939835-70941372	Zwint	0.89
chr10:74650455-74650829	Specc1l	0.97
chr10:75335251-75336682	Smarcb1	0.78
chr10:75355520-75356457	Smarcb1	0.83
chr10:75381010-75381928	Smarcb1	0.85
chr10:75464792-75465411	Col6a2	0.99
chr10:76264287-76265523	Col6a1	0.99
chr10:76271882-76273764	Smarcb1	0.76
chr10:76337076-76337627	Ddt	0.99
chr10:76466984-76468354	S100b	1
chr10:76470612-76471590	Ddt	0.56
chr10:76613413-76614603	Ube2g2	0.12
chr10:76627631-76628991	Ube2g2	0.14
chr10:76735503-76736401	Col18a1	1
chr10:76968253-76971125	1810008A18Rik	1
chr10:77007977-77008387	1810008A18Rik	1
chr10:77151887-77153710	Ube2g2	0.013
chr10:7756977-7758545	Katna1	0.94
chr10:77632055-77632458	Pfkl	0.87
chr10:77760157-77761556	Agpat3	1
chr10:77779212-77780159	Agpat3	0.62
chr10:77785475-77788595	Agpat3	0.98
chr10:79038255-79039115	Slc1a6	0.96
chr10:79093703-79095104	Slc1a6	0.96
chr10:79265335-79267628	Midn	1
chr10:79303930-79304434	Mrpl54	1
chr10:79396660-79397410	Dazap1	1
chr10:79510426-79511754	Tcf3	1
chr10:79580337-79582199	Mob3a	1
chr10:79652633-79654074	Tcf3	1
chr10:79671250-79672173	Tcf3	1
chr10:79758423-79759466	Med16	1
chr10:79794796-79796261	Slc39a3	1
chr10:79847866-79849753	Mob3a	1
chr10:80199494-80200185	Uqcr11	1
chr10:80600576-80601233	Mrpl54	1
chr10:80630100-80630437	Btbd2	1
chr10:80862908-80866691	Sgta	1
chr10:80873858-80880280	Uqcr11	1
chr10:82139467-82139793	Nfyb	0.91
chr10:82447995-82449171	D10Wsu102e	1
chr10:82482241-82483069	D10Wsu102e	1
chr10:83819848-83822296	Nuak1	0.98
chr10:83850039-83850630	Nuak1	0.96
chr10:84169882-84171846	Rfx4	0.95
chr10:84172802-84174919	Rfx4	0.98
chr10:84314860-84315434	Rfx4	0.47
chr10:84321467-84322536	Rfx4	0.95
chr10:84333915-84334198	Rfx4	0.96
chr10:84380095-84380708	Rfx4	0.91
chr10:84428581-84431041	Rfx4	0.96
chr10:84431560-84432346	Rfx4	0.89
chr10:8480131-8481128	Katna1	0.85
chr10:8481883-8482186	Nup43	1
chr10:85629757-85630468	D10Wsu52e	0.39
chr10:85779857-85780232	Timp3	0.73
chr10:85781004-85781596	Timp3	0.87
chr10:85783695-85784162	Timp3	0.88
chr10:86497601-86500577	Ascl1	1
chr10:86692746-86693237	Ascl1	0.96
chr10:86813948-86815047	Ascl1	1
chr10:86951442-86953448	Ascl1	1
chr10:87043288-87044368	Nup37	1
chr10:87389564-87390004	Nup37	1
chr10:89994405-89994936	Scyl2	0.83
chr10:90129824-90130178	Actr6	0.84
chr10:90233995-90235628	Tmpo	0.96
chr10:90247338-90248772	Slc25a3	0.99
chr10:9051491-9052653	Katna1	0.93
chr10:90644253-90645275	Tmpo	0.95
chr10:90650195-90650751	Tmpo	0.98
chr10:90691744-90692902	Nedd1	0.98
chr10:91008530-91009336	Nedd1	0.99
chr10:91147729-91149481	Nedd1	1
chr10:91541611-91542540	Nedd1	1
chr10:91795498-91796899	Nedd1	1
chr10:92018556-92020396	Nedd1	0.99
chr10:92253186-92255435	Nedd1	0.99
chr10:92300125-92300641	Nedd1	0.99
chr10:92628199-92629530	Snrpf	0.99
chr10:92657311-92658528	Elk3	0.59
chr10:92723827-92724795	Elk3	0.87
chr10:93095654-93096948	Elk3	0.93
chr10:93098429-93099335	Elk3	0.64
chr10:93103484-93106003	Snrpf	0.98
chr10:93198948-93199987	Snrpf	0.99
chr10:93350954-93352914	Nr2c1	0.88
chr10:93400995-93402623	4932415G12Rik	0.92
chr10:93406965-93409166	4932415G12Rik	0.95
chr10:93556463-93557236	Nr2c1	0.86
chr10:93591429-93593974	Metap2	0.75
chr10:93692822-93693995	Nr2c1	0.74
chr10:93728621-93729655	Fgd6	1
chr10:93845666-93846924	4932415G12Rik	0.81
chr10:93875565-93877856	4932415G12Rik	1
chr10:93879042-93879945	4932415G12Rik	0.85
chr10:93921460-93922122	Tmcc3	1
chr10:94084043-94086939	Nr2c1	0.76
chr10:94274778-94275322	Nr2c1	0.83
chr10:94602119-94602785	Socs2	0.73
chr10:94605567-94606821	Socs2	0.067
chr10:94716973-94717484	Socs2	0.96
chr10:95861046-95863232	Btg1	0.59
chr10:96309975-96311409	Btg1	0.79
chr11:100333121-100334067	Acly	1
chr11:100489870-100491132	Nbr1	0.99
chr11:101001607-101001847	1700113I22Rik	1
chr11:101049906-101052262	Nbr1	1
chr11:101338671-101339509	Brca1	1
chr11:101340279-101341485	Brca1	1
chr11:101344654-101347663	Psmc3ip	1
chr11:101386136-101388263	Plekhh3	1
chr11:101556728-101558224	Rdm1	1
chr11:101561143-101561991	Mpp3	1
chr11:101750538-101751301	Slc4a1	0.98
chr11:101870777-101872255	Hdac5	1
chr11:102157004-102157873	Rdm1	1
chr11:102307798-102308868	Rdm1	1
chr11:102498197-102499025	Nmt1	1
chr11:102600486-102601265	Adam11	1
chr11:102818504-102819588	Ccdc43	0.96
chr11:102824681-102825560	Gjc1	1
chr11:103751418-103752813	Gosr2	0.61
chr11:104133084-104134515	1700081L11Rik	0.92
chr11:105153691-105154846	Taco1	1
chr11:105368629-105369750	Limd2	1
chr11:105795959-105798082	Map3k3	0.74
chr11:106519090-106520354	Pecam1	1
chr11:106520949-106523002	Kpna2	0.97
chr11:106535628-106536879	Snord104	0.92
chr11:107186849-107187653	Psmd12	0.91
chr11:107274486-107275212	Psmd12	0.92
chr11:107277353-107278605	Psmd12	0.96
chr11:107544243-107545543	Apoh	1
chr11:107623817-107625399	Apoh	1
chr11:107639588-107641400	Apoh	0.99
chr11:108041757-108043227	Apoh	0.99
chr11:108781710-108784703	Axin2	1
chr11:108788193-108788763	Axin2	1
chr11:108790139-108790566	Axin2	1
chr11:108791381-108792933	Axin2	1
chr11:108796557-108797168	Axin2	0.98
chr11:108929340-108932924	Axin2	1
chr11:108958856-108960605	Axin2	1
chr11:108966382-108969760	Axin2	1
chr11:109060448-109061496	Axin2	1
chr11:109068095-109068496	Axin2	0.99
chr11:109071795-109072414	Axin2	1
chr11:109181564-109182523	Wipi1	0.96
chr11:109337087-109338260	Axin2	0.99
chr11:111755219-111755481	Sox9	0.95
chr11:112518677-112519342	Sox9	0.99
chr11:112645263-112647604	Sox9	0.84
chr11:112671576-112674238	Sox9	1
chr11:112679120-112679918	Sox9	1
chr11:112687256-112688724	Sox9	0.99
chr11:112721282-112723077	Sox9	0.98
chr11:112733550-112734718	Sox9	0.98
chr11:112907167-112908400	Sox9	1
chr11:112953497-112954221	Slc39a11	0.84
chr11:113045006-113046291	Sox9	1
chr11:113049147-113050509	Sox9	1
chr11:113053886-113054245	Slc39a11	0.69
chr11:113127679-113128164	Slc39a11	0.64
chr11:113187378-113189171	Sox9	0.67
chr11:113229301-113229931	Sox9	0.57
chr11:113234549-113235121	Slc39a11	0.5
chr11:113296792-113297140	Sox9	0.97
chr11:113300375-113302650	Sox9	0.95
chr11:113311752-113312665	Sox9	1
chr11:113328077-113330420	Sox9	0.9
chr11:113381645-113384128	Sox9	0.078
chr11:113414409-113417082	Slc39a11	0.92
chr11:113461409-113464210	Sox9	0.058
chr11:113472545-113473884	Sox9	0.74
chr11:113548114-113548501	Cdc42ep4	1
chr11:113570987-113572315	Cdc42ep4	0.99
chr11:113646908-113647578	Cdc42ep4	0.99
chr11:113658637-113659062	D11Wsu47e	0.99
chr11:113783992-113785645	Cdc42ep4	0.98
chr11:113901554-113902340	Cdc42ep4	1
chr11:113927898-113930239	Cdc42ep4	1
chr11:114100259-114101660	Cdc42ep4	0.99
chr11:114329155-114329975	D11Wsu47e	0.98
chr11:114333553-114334860	Cdc42ep4	0.99
chr11:114390294-114390782	Cdc42ep4	0.99
chr11:114397736-114399062	Cdc42ep4	0.99
chr11:114428295-114429011	Cdc42ep4	0.99
chr11:114457893-114459618	Cdc42ep4	0.98
chr11:114529918-114530986	Rpl38	0.99
chr11:114537226-114538673	Btbd17	0.99
chr11:114545769-114548105	Btbd17	1
chr11:114733916-114734858	Rpl38	0.96
chr11:115469947-115470804	Mrps7	1
chr11:115613898-115614568	Fam100b	0.99
chr11:115626791-115627422	Fam100b	1
chr11:115640261-115642513	Mrpl38	1
chr11:115674427-115674954	Srp68	1
chr11:115870746-115872532	Grb2	1
chr11:115891646-115892427	Fam100b	0.99
chr11:115922624-115923981	Mrps7	1
chr11:115990845-115992508	2310067B10Rik	1
chr11:116009816-116011096	Mrps7	0.95
chr11:116028828-116029453	2310067B10Rik	1
chr11:116190367-116191810	2310067B10Rik	1
chr11:116482457-116483161	Sec14l1	1
chr11:116504802-116505233	Srsf2	0.98
chr11:116518791-116519775	1110005A03Rik	0.98
chr11:116521588-116524924	1110005A03Rik	0.99
chr11:116671671-116676432	1110005A03Rik	0.98
chr11:116686490-116689329	1110005A03Rik	0.98
chr11:116782160-116784257	Sec14l1	1
chr11:117127747-117129113	1110005A03Rik	0.98
chr11:117130243-117131107	Syngr2	1
chr11:117146070-117147187	1110005A03Rik	0.99
chr11:117177629-117180232	Syngr2	0.98
chr11:117192864-117195030	1110005A03Rik	0.98
chr11:11721611-11723239	Fignl1	1
chr11:11724000-11726274	Fignl1	0.96
chr11:117265484-117266155	1110005A03Rik	0.98
chr11:117267831-117271928	1110005A03Rik	0.99
chr11:117297693-117298589	1110005A03Rik	0.99
chr11:117329699-117331676	1110005A03Rik	0.98
chr11:117339553-117341393	1110005A03Rik	0.98
chr11:117343740-117344757	1110005A03Rik	0.99
chr11:117352957-117353724	1110005A03Rik	0.98
chr11:117357350-117360164	1110005A03Rik	0.98
chr11:117401655-117403222	1110005A03Rik	0.98
chr11:117459095-117459892	Srsf2	0.99
chr11:117479107-117479581	1110005A03Rik	0.99
chr11:117488307-117490373	1110005A03Rik	0.99
chr11:11755682-11756422	Fignl1	0.75
chr11:117740100-117740332	Cyth1	0.92
chr11:117835656-117838037	Cant1	0.69
chr11:118003682-118004455	Cant1	0.63
chr11:118057988-118060057	Cant1	0.49
chr11:118062793-118064999	Cant1	0.65
chr11:118100442-118100886	Cant1	0.82
chr11:118188506-118189607	Cyth1	0.98
chr11:118222057-118222253	Cyth1	1
chr11:118300079-118300727	Cant1	0.45
chr11:118331115-118333573	Cant1	0.65
chr11:118342496-118343514	Engase	0.95
chr11:118600418-118602134	Engase	0.97
chr11:118605867-118607907	Cant1	0.58
chr11:118612839-118614145	Socs3	0.95
chr11:118617899-118622731	Engase	1
chr11:118653479-118656632	Cant1	0.41
chr11:118777477-118778540	Cant1	0.58
chr11:118833841-118835800	Cant1	0.45
chr11:119370368-119371311	Eif4a3	0.98
chr11:119374692-119377735	Eif4a3	0.98
chr11:119505921-119507393	Eif4a3	0.96
chr11:119627021-119629854	Eif4a3	0.98
chr11:119633938-119634298	2410002I01Rik	0.9
chr11:119649527-119651437	Eif4a3	0.96
chr11:119664447-119665028	Eif4a3	1
chr11:119668555-119669394	Eif4a3	0.98
chr11:119685562-119687037	Aatk	0.62
chr11:119707569-119709690	Aatk	0.74
chr11:119843988-119845020	Slc38a10	0.99
chr11:119849474-119851464	Aatk	0.84
chr11:119912069-119913190	Aatk	0.67
chr11:119947546-119948117	Eif4a3	0.97
chr11:119982287-119983380	Aatk	0.96
chr11:120011388-120012593	Eif4a3	0.98
chr11:120077471-120078995	Eif4a3	0.97
chr11:120084803-120087163	Eif4a3	0.98
chr11:120122495-120123521	Eif4a3	0.97
chr11:120166197-120167262	Eif4a3	0.99
chr11:120176773-120178218	Bahcc1	1
chr11:121300373-121300985	Alyref	1
chr11:121669983-121670232	Mafg	0.99
chr11:16490724-16492471	2810442I21Rik	0.93
chr11:16639742-16642191	Egfr	0.43
chr11:16730797-16732533	Egfr	0.74
chr11:16841022-16842811	Egfr	0.48
chr11:18922590-18923767	Meis1	0.06
chr11:19838730-19840000	Spred2	0.97
chr11:20531363-20533542	Sertad2	0.28
chr11:20539924-20540926	Sertad2	0.4
chr11:20549517-20551081	Sertad2	0.36
chr11:20554687-20557558	Sertad2	0.38
chr11:20867771-20868929	Vps54	1
chr11:23960788-23962961	Bcl11a	0.87
chr11:23999169-24000793	Bcl11a	0.76
chr11:24185281-24187650	Bcl11a	0.78
chr11:24204994-24206099	Bcl11a	0.76
chr11:24207420-24208552	Bcl11a	0.8
chr11:24270413-24271286	Bcl11a	0.82
chr11:24271927-24273234	Bcl11a	0.88
chr11:24639561-24641434	Bcl11a	0.77
chr11:25055720-25057683	Bcl11a	0.78
chr11:25255729-25258387	Bcl11a	0.8
chr11:25492306-25492759	Bcl11a	0.64
chr11:25595908-25598305	Bcl11a	0.76
chr11:25752964-25753491	Bcl11a	0.69
chr11:25754230-25754894	Bcl11a	0.76
chr11:25755720-25757368	Bcl11a	0.78
chr11:26672567-26673522	Bcl11a	0.72
chr11:30057958-30060126	Ccdc104	1
chr11:30060745-30061842	Ccdc104	0.99
chr11:30371377-30372309	Ccdc104	1
chr11:31594793-31595505	Bod1	1
chr11:31738526-31740263	Bod1	0.99
chr11:31909971-31910962	Asb3	0.93
chr11:31919962-31920834	Bod1	1
chr11:31926983-31927720	Bod1	1
chr11:31957293-31958212	Bod1	1
chr11:31986508-31988278	Bod1	1
chr11:32035910-32036244	Erlec1	0.89
chr11:32037649-32038913	Bod1	1
chr11:32282883-32284401	Hba-x	0.99
chr11:3230834-3231396	Zmat5	1
chr11:3236767-3238243	Drg1	1
chr11:32449034-32451074	Hba-x	0.99
chr11:32522704-32523024	Fbxw11	0.96
chr11:3270697-3272113	Drg1	1
chr11:33099488-33100332	Ranbp17	0.17
chr11:33672200-33673118	Npm1	0.96
chr11:34197589-34198200	Fam196b	0.22
chr11:34243179-34244504	Fam196b	0.38
chr11:35318000-35319275	Rars	1
chr11:35325881-35327714	Rars	1
chr11:35341151-35342002	Rars	1
chr11:35414492-35416499	Ccdc99	1
chr11:35669213-35671441	Rars	0.99
chr11:35678203-35679695	Rars	1
chr11:35691434-35692559	Pank3	0.99
chr11:35706253-35707602	Rars	1
chr11:35740483-35742104	Rars	1
chr11:35785635-35786320	Rars	1
chr11:3674274-3675069	Drg1	1
chr11:3732955-3734717	Uqcr10	1
chr11:4042909-4044292	Mtfp1	1
chr11:43198834-43199382	Pttg1	0.99
chr11:43361645-43362264	Slu7	0.91
chr11:43388296-43389715	Ttc1	1
chr11:43431142-43432146	Ttc1	0.98
chr11:43457189-43457690	Ttc1	0.99
chr11:43816373-43816668	Slu7	0.86
chr11:44447916-44449243	Clint1	0.86
chr11:44468140-44468943	Clint1	0.97
chr11:44470881-44471726	Clint1	0.95
chr11:44476609-44477710	Clint1	0.87
chr11:44553740-44555002	Clint1	0.97
chr11:44559761-44561203	Clint1	0.87
chr11:44645230-44647590	Clint1	0.93
chr11:44706234-44707205	Clint1	0.98
chr11:44713098-44714328	Clint1	0.23
chr11:44795560-44796009	Clint1	0.91
chr11:44839937-44841092	Clint1	0.91
chr11:45391112-45391900	Clint1	0.93
chr11:46031751-46032942	Thg1l	0.98
chr11:4661760-4662596	Tbc1d10a	1
chr11:47453686-47455391	Gm12183	0.2
chr11:48684398-48685872	Trim41	0.72
chr11:49063961-49064365	Gnb2l1	0.99
chr11:49744685-49746162	Cnot6	0.7
chr11:49747570-49749650	3010026O09Rik	0.96
chr11:49751364-49753405	3010026O09Rik	0.98
chr11:50320613-50321305	Zfp454	0.84
chr11:51272889-51274112	Zfp454	0.76
chr11:52254338-52254919	Hnrnpab	1
chr11:52360281-52360906	Hnrnpab	1
chr11:5324216-5325810	Emid1	0.99
chr11:53289082-53289366	Rad50	0.16
chr11:53820621-53821924	Fnip1	0.99
chr11:53871802-53872903	Cdc42se2	0.98
chr11:53926600-53927019	Cdc42se2	1
chr11:54125336-54127053	Cdc42se2	0.99
chr11:54567997-54568910	Cdc42se2	0.99
chr11:54625331-54627388	Cdc42se2	1
chr11:54786792-54787886	Gpx3	1
chr11:54828584-54830794	Gpx3	0.98
chr11:54836513-54837268	Cdc42se2	0.95
chr11:55154946-55156381	Slc36a1	1
chr11:56059933-56060972	Fam114a2	0.72
chr11:57366467-57367152	Fam114a2	0.52
chr11:57396837-57397665	Fam114a2	0.52
chr11:57401363-57401957	Fam114a2	0.71
chr11:57587157-57588174	Fam114a2	0.62
chr11:58680760-58681375	Gm9900	1
chr11:58976441-58977504	Hist3h2bb-ps	0.73
chr11:5930421-5931577	Purb	0.99
chr11:59521168-59521979	2310033P09Rik	0.87
chr11:59840862-59842184	4933439F18Rik	0.99
chr11:59843169-59844344	Alkbh5	0.99
chr11:59907587-59908853	Cops3	0.98
chr11:59927495-59929517	Cops3	0.98
chr11:59953065-59955084	Cops3	0.99
chr11:59988822-59991585	Cops3	0.99
chr11:60021830-60024520	Cops3	1
chr11:60046842-60047239	Cops3	0.88
chr11:60107258-60108685	Cops3	0.97
chr11:60124073-60126450	Cops3	0.94
chr11:60165722-60166394	Cops3	0.98
chr11:60198057-60199140	Cops3	0.97
chr11:60745605-60745803	B9d1	1
chr11:6078724-6079700	H2afv	0.97
chr11:61038630-61040383	Rnf112	1
chr11:61041364-61041881	Rnf112	1
chr11:61282139-61283203	Map2k3	0.99
chr11:62078914-62079362	Specc1	0.99
chr11:62079971-62080665	Specc1	0.99
chr11:62780167-62781295	Zfp286	0.9
chr11:6294170-6294509	Tmed4	1
chr11:62993158-62995339	Hs3st3b1	1
chr11:63084406-63085138	Hs3st3b1	0.98
chr11:63544698-63545838	Hs3st3b1	1
chr11:6371034-6371995	H2afv	0.91
chr11:63711702-63712592	Hs3st3b1	1
chr11:6379703-6382633	Zmiz2	1
chr11:63802556-63802974	2810001G20Rik	1
chr11:6414649-6415509	Purb	0.99
chr11:64781728-64782139	Hs3st3b1	0.94
chr11:65216070-65216469	Arhgap44	0.73
chr11:65249543-65249966	Arhgap44	0.69
chr11:6760168-6760864	Tbrg4	0.35
chr11:6789344-6790166	Adcy1	1
chr11:67958100-67960172	Myh10	0.39
chr11:68028179-68029557	Myh10	0.43
chr11:68057252-68058664	Ndel1	0.2
chr11:68086973-68088615	Myh10	0.52
chr11:6868756-6869620	Tbrg4	0.73
chr11:68912186-68913814	Trappc1	1
chr11:69145580-69146140	Chd3	1
chr11:69222346-69225840	Tmem107	1
chr11:69227891-69233100	Chd3	1
chr11:69359699-69360961	Pfas	1
chr11:69366270-69367148	Pfas	1
chr11:69520179-69521316	1810027O10Rik	1
chr11:69613114-69614490	Trp53	1
chr11:69652072-69652379	Aurkb	0.99
chr11:69842086-69844216	Pfn1	0.97
chr11:70409431-70410267	Med11	0.98
chr11:71311084-71312631	Wscd1	0.0027
chr11:72039744-72040118	Tax1bp3	1
chr11:72047378-72048278	Tmem93	1
chr11:72268919-72269498	Ankfy1	0.99
chr11:72389418-72390841	1200014J11Rik	0.99
chr11:72829086-72829969	Slc13a5	1
chr11:74690050-74691016	Mettl16	0.91
chr11:75026968-75027825	Mettl16	0.92
chr11:75739340-75740298	Fam101b	1
chr11:76080719-76082120	Ywhae	0.9
chr11:76103383-76104650	Ywhae	0.99
chr11:76106632-76107251	Ywhae	0.88
chr11:76108238-76108788	Ywhae	0.96
chr11:76263057-76264079	Pipox	1
chr11:76280471-76283760	Pipox	1
chr11:76307694-76308764	Pipox	0.98
chr11:76320810-76321978	Pipox	1
chr11:76336637-76337534	Pipox	1
chr11:76384379-76385193	Pipox	1
chr11:76453038-76453620	Ccdc55	1
chr11:76457611-76459580	Pipox	1
chr11:76460395-76461127	Rpl23a	0.99
chr11:77299981-77300851	Pipox	0.99
chr11:77438392-77439093	Traf4	1
chr11:77576733-77577915	Pipox	1
chr11:77603769-77604830	Pipox	1
chr11:77698358-77699728	Pipox	1
chr11:77700551-77701864	Pipox	0.99
chr11:77709611-77712014	Pipox	1
chr11:77719630-77720939	Ccdc55	1
chr11:77777957-77779394	Pipox	1
chr11:77851454-77852015	Pipox	1
chr11:77928040-77929802	Pipox	1
chr11:77977560-77978992	Pipox	1
chr11:78194150-78195187	Vtn	0.96
chr11:78599124-78599971	Fam58b	1
chr11:78633579-78634487	Fam58b	0.99
chr11:78855490-78855898	Fam58b	1
chr11:78870537-78871840	Fam58b	1
chr11:78883044-78883805	Fam58b	0.99
chr11:78908928-78909839	Fam58b	1
chr11:78930038-78931003	Fam58b	1
chr11:78959428-78960171	Fam58b	0.99
chr11:79426355-79427528	Fam58b	0.97
chr11:79459844-79460866	Fam58b	0.98
chr11:79473975-79474470	Fam58b	0.99
chr11:79515344-79516148	Fam58b	0.98
chr11:79517177-79518479	Fam58b	0.98
chr11:79605635-79606399	Fam58b	0.99
chr11:80103101-80104045	Atad5	1
chr11:80125784-80126939	Atad5	1
chr11:80129057-80130399	Atad5	1
chr11:80293199-80293904	1700071K01Rik	0.97
chr11:80311797-80312782	Psmd11	0.99
chr11:80316908-80318714	Tmem98	0.98
chr11:80331987-80332894	Tmem98	0.98
chr11:80390424-80392347	Tmem98	0.99
chr11:80415541-80417104	Psmd11	1
chr11:80435283-80437118	Tmem98	1
chr11:80645229-80646276	Tmem98	1
chr11:80947303-80947851	Tmem98	1
chr11:81299579-81300635	1700071K01Rik	0.58
chr11:81315155-81315771	Tmem98	0.99
chr11:81325778-81326572	1700071K01Rik	0.96
chr11:81425636-81427220	Tmem98	0.99
chr11:81580948-81582403	1700071K01Rik	0.66
chr11:81710872-81711865	Psmd11	0.98
chr11:82336540-82337686	Zfp830	0.76
chr11:83824536-83826186	Aatf	0.99
chr11:83855970-83857601	Aatf	0.81
chr11:84084718-84086650	Synrg	0.99
chr11:84162038-84163835	Lhx1	1
chr11:84189547-84191335	Ddx52	1
chr11:84244344-84245993	Lhx1	1
chr11:84376100-84377768	Aatf	0.84
chr11:84378619-84379431	Dusp14	1
chr11:84380457-84380910	Dusp14	0.98
chr11:84381594-84385009	Aatf	0.99
chr11:84386923-84388869	Lhx1	1
chr11:84391512-84393191	Ddx52	1
chr11:84396090-84396570	Lhx1	1
chr11:84398509-84401204	Lhx1	1
chr11:84449947-84452173	Lhx1	1
chr11:84455545-84456787	Ddx52	0.99
chr11:84535881-84536462	Synrg	0.99
chr11:84537312-84539960	Lhx1	0.99
chr11:84563335-84563575	Lhx1	1
chr11:84584176-84585264	Lhx1	1
chr11:8501694-8502537	Hus1	0.35
chr11:85671311-85671998	Ints2	0.92
chr11:86070187-86070917	Ints2	0.83
chr11:86632521-86633760	Prr11	1
chr11:86653220-86654927	Dhx40	1
chr11:86710202-86710966	Dhx40	1
chr11:86759790-86761533	Prr11	1
chr11:86796033-86797413	Dhx40	1
chr11:86806277-86807838	Dhx40	1
chr11:87409236-87410517	Mtmr4	0.98
chr11:87628303-87628620	Dynll2	1
chr11:87629644-87631081	Srsf1	0.98
chr11:87928230-87929324	Vezf1	1
chr11:87931517-87934003	Srsf1	1
chr11:87939671-87940863	Srsf1	0.99
chr11:87952425-87954050	Vezf1	1
chr11:87993948-87994566	Srsf1	1
chr11:88047209-88047939	Coil	0.97
chr11:88049167-88050049	Coil	0.98
chr11:88064940-88068065	Coil	0.99
chr11:88087172-88090828	Coil	0.98
chr11:88093891-88094567	Coil	0.97
chr11:88117089-88118209	Coil	0.99
chr11:88121642-88125336	Coil	0.98
chr11:88148147-88148857	Coil	1
chr11:88208317-88209700	Coil	0.99
chr11:88214900-88221127	Coil	0.99
chr11:88224444-88226761	Coil	0.99
chr11:88227342-88228645	Coil	0.87
chr11:88234475-88235783	Coil	1
chr11:88237127-88238638	Coil	0.98
chr11:88256797-88257958	Coil	0.99
chr11:88260596-88262253	Coil	1
chr11:88273454-88278441	Coil	1
chr11:88285212-88286811	Coil	0.99
chr11:88293965-88297491	Coil	1
chr11:88301754-88302529	Coil	0.91
chr11:88334331-88335187	Coil	0.99
chr11:88337270-88341540	Coil	0.98
chr11:88347555-88350051	Coil	0.99
chr11:88363448-88367651	Coil	0.99
chr11:88374814-88375350	Coil	1
chr11:88377300-88379120	Coil	0.98
chr11:88394853-88403801	Coil	1
chr11:88490816-88491366	Coil	0.98
chr11:88506196-88507167	Coil	1
chr11:88508376-88509099	Coil	1
chr11:88511765-88512444	Akap1	0.55
chr11:88550779-88552188	Coil	0.99
chr11:88554827-88555729	Coil	0.98
chr11:88563325-88564929	Coil	0.94
chr11:88569695-88571039	Coil	0.99
chr11:88577627-88578149	Coil	1
chr11:88681632-88682689	Coil	1
chr11:90232069-90232637	Stxbp4	0.99
chr11:93690384-93691237	Car10	0.97
chr11:94006310-94007386	Tob1	0.99
chr11:94010115-94011075	Ankrd40	0.5
chr11:94020411-94023296	Spag9	0.6
chr11:94071331-94072263	Spag9	0.62
chr11:94107249-94108338	Ankrd40	0.74
chr11:94201134-94202854	Spag9	0.58
chr11:94268799-94269655	Spag9	0.62
chr11:94273854-94275634	Spag9	0.79
chr11:94289667-94291151	Spag9	0.72
chr11:94330137-94330993	Spag9	0.73
chr11:94562933-94563399	Mrpl10	1
chr11:94564490-94566266	Ppp1r9b	1
chr11:95275633-95276700	Sp2	0.93
chr11:95354084-95355608	Snf8	0.98
chr11:95361697-95363015	Mrpl10	0.97
chr11:95364687-95365842	Npepps	0.96
chr11:95849640-95853491	Kpnb1	1
chr11:96439373-96440625	Kpnb1	1
chr11:96555945-96557627	Igf2bp1	0.99
chr11:96574699-96575648	Kpnb1	1
chr11:96604404-96605118	Igf2bp1	1
chr11:96732830-96739019	Cbx1	1
chr11:96746042-96748709	Lrrc59	1
chr11:96757744-96758797	Cbx1	1
chr11:96760518-96762594	Kpnb1	1
chr11:96763221-96765079	Cbx1	1
chr11:96767603-96769629	Cbx1	1
chr11:97262232-97262856	Igf2bp1	1
chr11:97289190-97290070	Kpnb1	1
chr11:97392216-97394409	Socs7	1
chr11:97398168-97399083	Ppp1r9b	1
chr11:97666912-97668072	1810046J19Rik	0.97
chr11:97672659-97674906	1810046J19Rik	0.98
chr11:97679769-97680795	1810046J19Rik	0.98
chr11:97811011-97812114	1810046J19Rik	0.99
chr11:98194298-98195940	Neurod2	1
chr11:98199800-98200149	Psmd3	0.98
chr11:98232272-98233664	1810046J19Rik	0.99
chr11:98884918-98885492	Igfbp4	0.94
chr11:98908164-98909304	Krt222	0.33
chr11:98992631-98994007	Smarce1	1
chr11:99114343-99114861	Igfbp4	1
chr12:100247532-100250027	Eml5	1
chr12:100458100-100458521	Eml5	1
chr12:100459303-100459938	Tdp1	1
chr12:100485345-100486083	Foxn3	0.84
chr12:100522361-100524036	Zc3h14	0.94
chr12:100544157-100545573	Zc3h14	0.94
chr12:100568071-100568429	Eml5	0.99
chr12:100574717-100575028	Foxn3	0.92
chr12:100578446-100578812	Eml5	1
chr12:100878380-100879479	Tdp1	1
chr12:100953156-100954817	Foxn3	0.92
chr12:101361322-101362379	Calm1	0.94
chr12:101406235-101407041	Ccdc88c	0.86
chr12:101466166-101466864	Ccdc88c	0.99
chr12:101514654-101515714	Ccdc88c	0.95
chr12:101520102-101521342	Ccdc88c	1
chr12:101545622-101546258	Ccdc88c	1
chr12:101551581-101553132	Ccdc88c	1
chr12:101628727-101629312	Ccdc88c	0.99
chr12:101933268-101934689	Calm1	0.96
chr12:102016200-102017812	Ccdc88c	1
chr12:103295570-103297309	Cpsf2	0.98
chr12:103540421-103542573	Lgmn	0.73
chr12:103546396-103547028	Lgmn	0.65
chr12:103656906-103659018	Lgmn	0.95
chr12:103878165-103879504	Ubr7	0.82
chr12:103899228-103900832	D230037D09Rik	0.63
chr12:103936166-103937141	Ubr7	0.93
chr12:103968218-103969876	Ubr7	0.9
chr12:104317168-104317817	Btbd7	0.76
chr12:104401868-104403757	Btbd7	0.94
chr12:104626963-104627379	Btbd7	0.94
chr12:104663265-104663969	Btbd7	0.82
chr12:106437937-106438483	Papola	1
chr12:107319488-107321180	Vrk1	0.92
chr12:107412257-107414254	Bcl11b	0.94
chr12:107717507-107718265	Vrk1	0.91
chr12:108567199-108568006	Bcl11b	0.93
chr12:109209248-109209764	Bcl11b	0.95
chr12:109217852-109219577	Bcl11b	0.97
chr12:109356760-109357949	Vrk1	0.98
chr12:109558226-109559955	Eml1	0.85
chr12:109633785-109634889	Eml1	0.86
chr12:109660884-109662001	Eml1	0.85
chr12:109669218-109669768	Eml1	1
chr12:109718741-109719657	Eml1	0.86
chr12:109741342-109741828	Eml1	0.87
chr12:109802781-109804003	Yy1	1
chr12:109843808-109845003	Yy1	1
chr12:109906390-109907364	Wars	1
chr12:110073559-110074923	Yy1	1
chr12:110143502-110145188	LOC640611	1
chr12:110197344-110198219	Yy1	1
chr12:110323585-110324171	LOC640611	1
chr12:110798188-110799540	Yy1	1
chr12:110983549-110985170	Yy1	1
chr12:110987435-110989025	LOC640611	1
chr12:111186215-111187354	LOC640611	1
chr12:111698841-111699632	Hsp90aa1	0.97
chr12:111723483-111724639	Ppp2r5c	0.76
chr12:111736739-111737889	Hsp90aa1	0.16
chr12:111748105-111749628	Wdr20a	0.93
chr12:112074985-112075876	Ppp2r5c	0.81
chr12:112084210-112085436	Hsp90aa1	0.99
chr12:112400499-112401275	Cdca4	1
chr12:112598985-112599386	Zfyve21	1
chr12:112925086-112926530	Brf1	1
chr12:112929772-112934961	Siva1	1
chr12:112935709-112937243	Cdc42bpb	1
chr12:112956522-112957783	Bag5	1
chr12:112962005-112964848	Zfyve21	1
chr12:113003992-113005890	Cdca4	1
chr12:113158080-113158979	Brf1	1
chr12:113401526-113402911	Siva1	1
chr12:113420189-113420641	Cdca4	1
chr12:113460096-113460671	Cdca4	1
chr12:113479434-113480578	Siva1	1
chr12:113537095-113537949	Cdca4	1
chr12:113567200-113569718	Siva1	1
chr12:113570808-113573523	Cdca4	1
chr12:113575384-113575958	Siva1	1
chr12:113779967-113781294	Cdca4	1
chr12:113828945-113829726	Eif5	0.99
chr12:113898638-113900755	Akt1	1
chr12:113901487-113904949	Cdca4	1
chr12:113931467-113932383	Siva1	1
chr12:113984608-113986487	Cdca4	1
chr12:114267371-114267663	Bag5	1
chr12:114270542-114271539	Siva1	1
chr12:118157308-118159256	Zfp386	1
chr12:118266599-118267861	Zfp386	1
chr12:118277748-118278519	Zfp386	1
chr12:118285886-118286986	Zfp386	1
chr12:118291644-118293761	Zfp386	1
chr12:118389042-118399439	Zfp386	1
chr12:118407996-118415901	Zfp386	1
chr12:118434725-118436401	Zfp386	0.95
chr12:118437256-118437788	Zfp386	1
chr12:118438595-118439298	Zfp386	1
chr12:118440954-118442384	Zfp386	0.99
chr12:118495201-118496858	Zfp386	1
chr12:118582872-118584766	Zfp386	0.99
chr12:12268988-12269241	Gen1	0.91
chr12:12293800-12295081	Vsnl1	0.95
chr12:12321556-12322656	Smc6	0.93
chr12:12617627-12619294	Mycn	0.16
chr12:12687048-12688941	Ddx1	0.76
chr12:12690713-12691460	Nbas	0.84
chr12:12700298-12701751	Ddx1	0.64
chr12:12722288-12722693	Mycn	0.59
chr12:12729682-12731112	Ddx1	0.61
chr12:12731786-12733056	Ddx1	0.67
chr12:12816780-12818194	Mycn	1
chr12:12819017-12820581	Ddx1	0.97
chr12:12832588-12833278	Mycn	0.61
chr12:12834584-12835189	Ddx1	1
chr12:12882872-12885305	Ddx1	1
chr12:12910347-12913700	Ddx1	0.76
chr12:13166409-13167265	Nbas	0.6
chr12:16806901-16807913	E2f6	1
chr12:17070543-17071180	E2f6	1
chr12:25578568-25579567	Rrm2	0.97
chr12:25589669-25590431	Rrm2	1
chr12:25809049-25811430	Rrm2	1
chr12:26479058-26480483	Klf11	0.83
chr12:26549191-26551287	Klf11	0.94
chr12:26555437-26557394	Klf11	0.54
chr12:26676133-26677274	Klf11	0.79
chr12:26752716-26753990	Klf11	0.91
chr12:26796520-26798117	Klf11	0.98
chr12:26798664-26801885	Klf11	0.8
chr12:26876072-26877107	Klf11	0.88
chr12:27315746-27317699	Sox11	0.99
chr12:27319437-27320883	Sox11	0.99
chr12:27562143-27563275	Sox11	0.99
chr12:27569765-27572932	Sox11	1
chr12:27587781-27589434	Sox11	1
chr12:27620902-27622928	Sox11	1
chr12:27702823-27703691	Sox11	1
chr12:27744891-27751605	Sox11	1
chr12:27765803-27770663	Sox11	1
chr12:27823040-27826607	Sox11	1
chr12:27827589-27828618	Sox11	0.99
chr12:27834962-27836815	Sox11	1
chr12:27867326-27868416	Sox11	0.99
chr12:27978597-27979218	Sox11	0.99
chr12:28041964-28042548	Sox11	0.99
chr12:28221603-28222307	Sox11	1
chr12:28248828-28253026	Sox11	0.99
chr12:28259738-28261851	Sox11	1
chr12:28662433-28663897	Sox11	0.99
chr12:28744753-28746012	Sox11	0.99
chr12:29484512-29485583	Rps7	1
chr12:29500906-29504190	Rps7	1
chr12:29533491-29534243	Rps7	0.96
chr12:29633557-29635221	Tssc1	0.93
chr12:29732687-29734840	Rps7	1
chr12:29768183-29768964	Tssc1	0.98
chr12:29780026-29781728	Rps7	1
chr12:29825444-29827046	Rps7	0.7
chr12:29917557-29918509	Rps7	1
chr12:29924718-29925508	Tssc1	0.58
chr12:29942291-29943369	Rps7	1
chr12:30033767-30034684	Rnaseh1	1
chr12:30041282-30043016	Rps7	1
chr12:30052879-30054401	Rps7	1
chr12:30219190-30220337	Rps7	1
chr12:30313959-30315399	Rps7	0.99
chr12:30324136-30326007	Rps7	0.89
chr12:30327571-30328347	Rps7	1
chr12:30339667-30342146	Rps7	0.97
chr12:30348099-30351276	Rps7	1
chr12:30382844-30384843	Rps7	1
chr12:30386235-30388018	Rps7	0.99
chr12:30500486-30502147	Rps7	1
chr12:30556695-30558268	Rps7	1
chr12:32579811-32582543	Gpr22	0.99
chr12:32590651-32591469	Gpr22	0.93
chr12:32598493-32599749	Hbp1	1
chr12:3370954-3372224	Dnmt3a	1
chr12:33746587-33747095	Twistnb	0.16
chr12:33756958-33758135	Twistnb	0.3
chr12:33795448-33796401	Twistnb	0.52
chr12:35748134-35748535	Snx13	0.84
chr12:36720126-36721322	Tspan13	0.9
chr12:3761221-3762516	Rab10	0.78
chr12:3849634-3851080	1110002L01Rik	0.97
chr12:4006207-4007679	Ncoa1	1
chr12:4008450-4009383	Rab10	0.85
chr12:41225310-41226282	Dock4	0.53
chr12:41238876-41239286	Zfp277	0.84
chr12:41516453-41518122	Zfp277	0.78
chr12:4529975-4530961	Dnmt3a	1
chr12:5195621-5196383	Apob	0.99
chr12:5259906-5261692	Rhob	0.84
chr12:5274166-5275690	1110057K04Rik	1
chr12:53482590-53482881	G2e3	0.99
chr12:53724407-53725015	Scfd1	0.94
chr12:53772375-53773827	G2e3	1
chr12:53870305-53871236	G2e3	0.99
chr12:53872619-53876254	Hectd1	1
chr12:53891141-53891766	Ap4s1	1
chr12:53932592-53933095	Nubpl	0.97
chr12:53934407-53937928	Nubpl	0.97
chr12:54133656-54134461	1110002B05Rik	0.98
chr12:54161911-54164258	1110002B05Rik	1
chr12:54165298-54166402	1110002B05Rik	0.95
chr12:54172148-54172629	1110002B05Rik	0.99
chr12:5435277-5436147	Rhob	0.99
chr12:54688655-54689470	1110002B05Rik	0.99
chr12:55077424-55077713	1110002B05Rik	0.9
chr12:55135019-55136228	1110002B05Rik	1
chr12:55153540-55154882	1110002B05Rik	0.99
chr12:55292063-55294006	1110002B05Rik	1
chr12:55299725-55300720	1110002B05Rik	1
chr12:55304435-55304782	1110002B05Rik	0.95
chr12:55387755-55389637	1110002B05Rik	0.93
chr12:55413774-55414423	1110002B05Rik	0.97
chr12:56547224-56548549	Psma6	1
chr12:56565138-56567453	Nfkbia	0.8
chr12:5742533-5743021	1110057K04Rik	0.98
chr12:69700114-69701541	Mdga2	0.034
chr12:69875956-69877226	Mdga2	0.019
chr12:70518809-70519415	Trim9	1
chr12:70602916-70603616	Rpl36al	1
chr12:71169590-71170366	Sav1	1
chr12:71468167-71469293	Sav1	1
chr12:72224007-72224949	Dact1	0.61
chr12:72380618-72381401	2700049A03Rik	0.92
chr12:72582453-72583668	Dact1	0.4
chr12:72588593-72589113	2700049A03Rik	0.95
chr12:72673259-72674345	2700049A03Rik	0.92
chr12:73336104-73337605	1810048J11Rik	0.48
chr12:73433212-73433634	Ppm1a	0.93
chr12:73465676-73467846	1810048J11Rik	0.89
chr12:73473957-73476668	1810048J11Rik	0.72
chr12:74780119-74780784	Hif1a	0.96
chr12:76974716-76975862	Syne2	0.97
chr12:77182232-77183125	Syne2	0.94
chr12:77365220-77366042	Akap5	0.8
chr12:78109931-78110777	Fut8	0.72
chr12:78600752-78602443	Fut8	0.86
chr12:78611818-78613161	Fut8	0.77
chr12:78629140-78630377	Fut8	0.97
chr12:78695913-78697055	Fut8	0.83
chr12:78778752-78779506	Fut8	0.96
chr12:78839742-78841056	Fut8	0.67
chr12:79199685-79201286	Tmem229b	1
chr12:80053131-80053861	Tmem229b	0.97
chr12:80292091-80292614	Zfp36l1	0.8
chr12:80611992-80613524	Rdh11	0.93
chr12:80820094-80821708	Zfp36l1	0.95
chr12:80833196-80834868	Rdh11	0.53
chr12:80908300-80909497	Zfp36l1	0.82
chr12:80979871-80981281	Zfp36l1	0.87
chr12:81011517-81012994	Zfp36l1	0.73
chr12:81025198-81028226	Zfp36l1	0.81
chr12:81070476-81071947	Zfp36l1	0.95
chr12:81090382-81091521	Rdh11	1
chr12:81104094-81104536	Rdh11	1
chr12:81114090-81115887	Zfp36l1	0.9
chr12:81123718-81124182	Zfp36l1	0.9
chr12:81162083-81165518	Zfp36l1	0.91
chr12:81231836-81232218	Zfp36l1	0.96
chr12:81292088-81292652	3830431G21Rik	1
chr12:81607915-81608540	3830431G21Rik	1
chr12:81837244-81838751	Erh	0.46
chr12:81912736-81913712	4933426M11Rik	0.48
chr12:81916408-81919655	4933426M11Rik	0.75
chr12:82155143-82157654	Cox16	0.99
chr12:82209330-82211511	Cox16	1
chr12:82246780-82248144	Cox16	1
chr12:82267143-82267817	Cox16	1
chr12:8333842-8334462	Apob	0.99
chr12:8346056-8347081	1110057K04Rik	1
chr12:8370868-8371569	Apob	1
chr12:84033740-84034733	Dpf3	0.29
chr12:85121833-85123167	Ptgr2	0.62
chr12:85132426-85134090	Ptgr2	0.97
chr12:85291614-85292406	2410016O06Rik	0.89
chr12:85339250-85339883	Ptgr2	0.79
chr12:85489084-85489792	2410016O06Rik	0.87
chr12:85516484-85517620	2410016O06Rik	0.72
chr12:86158983-86161576	Acyp1	0.91
chr12:86181743-86182819	Acyp1	1
chr12:86542328-86542676	Eif2b2	1
chr12:86777365-86777763	Fos	0.95
chr12:87443739-87445118	1700019E19Rik	1
chr12:87503714-87504703	1700019E19Rik	1
chr12:87522231-87523172	Ttll5	0.96
chr12:87561560-87562270	1700019E19Rik	1
chr12:87725022-87725468	1700019E19Rik	1
chr12:87987257-87989113	1700020O03Rik	1
chr12:87993184-87994196	0610007P14Rik	1
chr12:87999868-88001156	1700019E19Rik	1
chr12:88038889-88042414	Ttll5	0.99
chr12:88127174-88128858	Ahsa1	1
chr12:88139925-88140329	Ahsa1	0.99
chr12:88141424-88143886	Ahsa1	1
chr12:88147271-88149073	Ahsa1	0.99
chr12:88155557-88158430	Ahsa1	1
chr12:88164406-88165867	Ahsa1	0.99
chr12:88231564-88239669	Ahsa1	0.99
chr12:88252519-88253212	Ahsa1	0.99
chr12:88301349-88302093	2310044G17Rik	1
chr12:8919588-8920100	Sdc1	1
chr12:8928153-8930247	Sdc1	0.98
chr12:96976309-96977466	Flrt2	0.14
chr12:99073781-99075872	Galc	0.014
chr12:99159641-99160349	Kcnk10	0.98
chr12:99715444-99717554	Kcnk10	1
chr12:99740730-99741176	Kcnk10	1
chr12:99799526-99803792	Kcnk10	0.94
chr12:99811458-99813897	Kcnk10	0.99
chr13:100053846-100055252	Tnpo1	0.98
chr13:100123389-100123706	Mtap1b	0.2
chr13:100213322-100218655	Mtap1b	0.31
chr13:100244973-100246033	Mtap1b	0.25
chr13:100261894-100264030	Mtap1b	0.45
chr13:100270971-100273544	Mtap1b	0.28
chr13:100363767-100364610	Mtap1b	0.24
chr13:100378785-100380383	Mtap1b	0.24
chr13:100493429-100494716	Mtap1b	0.31
chr13:100709957-100710472	Mtap1b	0.67
chr13:102252119-102252544	Gm6115	0.19
chr13:102257338-102258461	Pik3r1	0.26
chr13:104038287-104038955	Mast4	0.78
chr13:105299633-105301238	Rgs7bp	1
chr13:105308165-105309453	Ppwd1	1
chr13:105380501-105381065	Rgs7bp	0.98
chr13:105653445-105654087	Rgs7bp	0.74
chr13:105792293-105793055	Rgs7bp	1
chr13:106039750-106040952	Srek1ip1	1
chr13:108329997-108332449	Zswim6	0.93
chr13:108407891-108409845	Zswim6	0.92
chr13:108453513-108454707	Zswim6	0.94
chr13:108473401-108474049	Zswim6	0.9
chr13:108603745-108604374	Zswim6	1
chr13:108627373-108627917	Zswim6	0.85
chr13:108744373-108746716	Zswim6	0.92
chr13:108853558-108854973	Zswim6	0.95
chr13:109623629-109624945	Pde4d	0.98
chr13:112025522-112026955	Plk2	0.85
chr13:112124210-112124999	Rab3c	0.95
chr13:112567132-112569736	Map3k1	0.89
chr13:112573041-112590860	Map3k1	0.94
chr13:112715055-112719381	Map3k1	0.99
chr13:112726078-112728223	Map3k1	0.92
chr13:112768204-112769627	Map3k1	0.97
chr13:112787022-112789734	Map3k1	1
chr13:112790641-112793698	Map3k1	0.95
chr13:112836195-112838399	Map3k1	0.98
chr13:112890727-112891486	Gpbp1	0.44
chr13:112949076-112951517	Map3k1	1
chr13:113003698-113004369	Map3k1	1
chr13:113045336-113048251	Map3k1	0.98
chr13:114162636-114164745	Snx18	0.97
chr13:114496171-114497060	Arl15	0.45
chr13:118554224-118555316	Hcn1	0.86
chr13:12018934-12019122	Mtr	0.94
chr13:120197164-120198251	Paip1	0.99
chr13:15576635-15579622	Gli3	0.99
chr13:15633436-15634898	Gli3	1
chr13:15635842-15636540	Gli3	1
chr13:18372530-18374458	Rala	0.83
chr13:20553230-20554187	Zfp187	0.87
chr13:20727908-20728345	Zfp187	0.97
chr13:21127653-21128703	Zfp187	0.98
chr13:23676706-23678834	Hist1h2ad	0.99
chr13:24208570-24210047	Acot13	0.98
chr13:24668452-24668712	Hist1h4a	0.89
chr13:24696315-24697924	Gmnn	1
chr13:24720270-24721920	Gmnn	1
chr13:25841722-25843645	Sox4	0.15
chr13:28386589-28388413	Sox4	0.066
chr13:28500622-28501168	Sox4	0.33
chr13:28506623-28511128	Sox4	0.08
chr13:28678460-28679554	Gm11362	0.52
chr13:28809607-28811149	Sox4	0.061
chr13:28812840-28814305	Sox4	0.15
chr13:28849867-28850577	Sox4	0.43
chr13:28873459-28875102	Sox4	0.16
chr13:28887167-28887567	Sox4	0.23
chr13:28902265-28904419	Sox4	0.24
chr13:28976102-28977741	Sox4	0.16
chr13:29288011-29289263	Sox4	0.22
chr13:29461974-29464195	Sox4	0.11
chr13:29506320-29509300	Sox4	0.12
chr13:29701193-29704482	Sox4	0.046
chr13:29850549-29853243	Gm11362	0.91
chr13:33177032-33178849	Serpinb6a	0.68
chr13:34180030-34181288	Psmg4	0.97
chr13:34227689-34229424	Cdyl	0.94
chr13:34239914-34242763	Psmg4	0.95
chr13:34248513-34248907	Cdyl	0.99
chr13:34284908-34286180	Psmg4	0.97
chr13:34329944-34332189	Rpp40	0.9
chr13:34336112-34337055	Psmg4	0.98
chr13:34339635-34342390	Psmg4	0.91
chr13:34361378-34362344	Psmg4	0.96
chr13:34363063-34364398	Psmg4	0.94
chr13:34369794-34371342	Prpf4b	0.93
chr13:34378923-34381622	Psmg4	0.93
chr13:34761825-34762192	Psmg4	0.96
chr13:34767287-34768320	Rpp40	0.95
chr13:34818204-34818873	Cdyl	0.88
chr13:34905933-34908011	Rpp40	0.91
chr13:35333160-35333613	Cdyl	1
chr13:35593341-35594211	Bphl	0.95
chr13:36385173-36386229	Ly86	1
chr13:36625093-36626173	Nrn1	0.81
chr13:36629977-36630446	Gm4024	0.95
chr13:36670588-36671020	Gm4024	0.92
chr13:36674071-36676305	Gm4024	0.89
chr13:36704644-36705464	Gm4024	0.44
chr13:36815719-36817473	Gm4024	0.92
chr13:37193140-37194572	Lyrm4	0.97
chr13:37402459-37405352	Gm4024	0.62
chr13:39629543-39630358	Snrnp48	0.86
chr13:39704270-39704608	Tfap2a	1
chr13:40982203-40982780	Pak1ip1	1
chr13:41012721-41013246	Pak1ip1	0.99
chr13:41453724-41455490	Nedd9	0.35
chr13:41537266-41538359	Nedd9	0.58
chr13:43598539-43599477	Dtnbp1	0.99
chr13:43624875-43627942	Dtnbp1	0.99
chr13:43779762-43780258	Dtnbp1	0.97
chr13:43833613-43836961	Dtnbp1	1
chr13:43901418-43903165	Dtnbp1	1
chr13:43995104-43996260	Ccdc90a	0.99
chr13:44317476-44318003	Dtnbp1	0.98
chr13:44326885-44328267	Dtnbp1	0.99
chr13:44449271-44449586	Dtnbp1	0.99
chr13:44548650-44549963	Dtnbp1	1
chr13:44561275-44562051	Tbc1d7	0.97
chr13:44596585-44597618	Ranbp9	1
chr13:44659995-44660428	Dtnbp1	0.98
chr13:44846302-44848305	Dtnbp1	1
chr13:44850594-44851117	Dtnbp1	0.85
chr13:44934352-44938966	Dtnbp1	1
chr13:46115530-46115720	Atxn1	0.14
chr13:46445174-46446239	Atxn1	0.34
chr13:47002866-47003364	Nup153	0.99
chr13:47070331-47071949	Nup153	0.98
chr13:47368455-47369881	Dek	0.84
chr13:47437707-47438201	Id4	0.88
chr13:47830635-47831592	Dek	0.89
chr13:47938751-47939521	Dek	0.89
chr13:47950718-47951838	Dek	0.83
chr13:48004808-48006233	Id4	0.12
chr13:48197650-48198684	Dek	0.8
chr13:48225370-48227853	Dek	0.77
chr13:48266819-48267879	Dek	0.75
chr13:48661047-48661871	Phf2	1
chr13:49110726-49112167	Cenpp	0.93
chr13:49139330-49140043	Bicd2	1
chr13:49226982-49228037	Cenpp	1
chr13:49267296-49268456	1110007C09Rik	0.97
chr13:49575215-49576904	1110007C09Rik	0.93
chr13:51215909-51216880	Cks2	1
chr13:51324234-51325272	Cks2	0.95
chr13:51408965-51411218	Cks2	0.94
chr13:51440324-51442338	Cks2	0.86
chr13:51513419-51513995	Cks2	0.96
chr13:51662357-51665852	Secisbp2	0.82
chr13:51827605-51828468	Gadd45g	0.94
chr13:51856407-51857500	Gadd45g	0.77
chr13:51900425-51902038	Sema4d	0.94
chr13:51911578-51913080	Sema4d	0.85
chr13:51997467-51998660	Gadd45g	0.98
chr13:52012245-52017169	Gadd45g	0.93
chr13:52110197-52111378	Gadd45g	0.91
chr13:52137296-52137949	Gadd45g	0.45
chr13:53307518-53308046	Sptlc1	0.91
chr13:54364989-54365773	Sfxn1	0.68
chr13:54403547-54405119	Sfxn1	0.43
chr13:54859355-54860130	Lman2	0.9
chr13:54925260-54926278	Mxd3	1
chr13:54975577-54976554	Ddx41	0.98
chr13:54980266-54980910	Nsd1	0.99
chr13:55269991-55271077	Ddx41	0.98
chr13:55272613-55274056	Ddx41	0.97
chr13:55571615-55574593	Ddx41	0.99
chr13:56204602-56206315	Tgfbi	0.78
chr13:56309724-56310746	Neurog1	1
chr13:56322411-56323702	Neurog1	0.99
chr13:56359976-56361776	Neurog1	1
chr13:56682714-56684646	Neurog1	1
chr13:56875476-56876402	Neurog1	0.98
chr13:57209127-57209887	Neurog1	1
chr13:57417482-57418436	Neurog1	0.95
chr13:57990950-57991742	Neurog1	1
chr13:58214426-58215082	5133401N09Rik	1
chr13:58577811-58578039	Ubqln1	0.95
chr13:58927185-58928258	Agtpbp1	0.91
chr13:59111837-59113494	Golm1	1
chr13:59141608-59142985	Golm1	1
chr13:59192596-59194789	Golm1	1
chr13:59244955-59246188	Golm1	1
chr13:59247341-59247889	Golm1	0.99
chr13:59596561-59597739	Golm1	1
chr13:59635267-59636921	Agtpbp1	0.86
chr13:59653702-59654081	Agtpbp1	0.95
chr13:59752884-59755010	Naa35	1
chr13:60027491-60030191	Gas1	1
chr13:60042449-60042851	Gas1	0.97
chr13:60072033-60073656	Gas1	1
chr13:60211709-60211960	Gas1	1
chr13:60226831-60227860	Gas1	1
chr13:60247215-60249574	Gas1	1
chr13:60271272-60273477	Gas1	1
chr13:60623670-60625096	Zcchc6	0.73
chr13:60729075-60729612	Gas1	1
chr13:63652905-63656352	0610007P08Rik	0.88
chr13:64091884-64092482	0610007P08Rik	0.99
chr13:6472771-6473673	Net1	1
chr13:70072173-70073569	Med10	0.88
chr13:70125700-70127687	Med10	0.92
chr13:70482447-70484320	Med10	0.92
chr13:70653532-70654447	Med10	0.95
chr13:71022657-71024050	Ndufs6	1
chr13:71173510-71174962	Mrpl36	1
chr13:71243305-71244763	Irx1	1
chr13:71286936-71288508	Irx1	1
chr13:71295962-71299483	Irx1	1
chr13:71349458-71350674	Mrpl36	1
chr13:71387222-71388704	Mrpl36	1
chr13:71813834-71814384	Mrpl36	1
chr13:72088501-72091531	Irx2	1
chr13:72104919-72105986	Irx2	0.99
chr13:72200434-72201277	Irx1	1
chr13:72425173-72427116	Irx1	1
chr13:72429724-72430093	Mrpl36	1
chr13:72438517-72441945	Irx1	1
chr13:72761251-72762782	Irx2	0.98
chr13:72775807-72777545	Irx2	0.93
chr13:72952559-72955180	Irx2	0.99
chr13:73096076-73096784	Irx1	0.99
chr13:73171355-73173426	Irx1	1
chr13:73244377-73245579	Irx2	0.99
chr13:73297064-73297826	Irx2	1
chr13:73443053-73444849	Irx1	0.99
chr13:78323547-78324641	Ankrd32	0.92
chr13:78332400-78335194	Ankrd32	0.69
chr13:81768063-81770152	Gpr98	1
chr13:84005709-84006495	Tmem161b	0.2
chr13:84021915-84025681	Tmem161b	0.26
chr13:84127089-84128254	Tmem161b	0.61
chr13:84137224-84137534	C130071C03Rik	0.57
chr13:84190757-84207345	Tmem161b	0.73
chr13:84482762-84490696	Tmem161b	0.34
chr13:84537898-84539930	C130071C03Rik	0.88
chr13:84543885-84545682	Tmem161b	0.58
chr13:84704618-84712331	C130071C03Rik	0.48
chr13:84894823-84898958	Tmem161b	0.94
chr13:84899783-84901585	Tmem161b	0.99
chr13:84922892-84924213	C130071C03Rik	0.79
chr13:91268178-91268761	Atg10	0.39
chr13:91509673-91512056	Atg10	0.94
chr13:93473053-93473997	Papd4	0.98
chr13:93502464-93504735	Ankrd34b	0.99
chr13:93506369-93507413	Papd4	0.97
chr13:94280646-94281592	Ankrd34b	0.97
chr13:94608570-94610661	Otp	0.78
chr13:94943645-94944473	Wdr41	1
chr13:94948184-94949731	Scamp1	0.96
chr13:95145502-95146034	Wdr41	1
chr13:96409080-96410220	F2r	0.77
chr13:98019522-98022807	Enc1	1
chr13:98026263-98026899	Enc1	0.99
chr13:98061046-98063157	Enc1	0.77
chr13:98145562-98146836	Enc1	0.96
chr13:98204976-98207069	Enc1	0.97
chr13:98208869-98209659	Enc1	1
chr13:98293723-98294317	Enc1	0.69
chr13:98516624-98517959	Enc1	0.95
chr13:98565846-98570076	Enc1	0.96
chr13:98593528-98596601	Enc1	0.96
chr13:98670072-98670450	Enc1	0.97
chr13:98729602-98730230	Enc1	0.99
chr13:99800688-99801954	Mrps27	1
chr14:103325005-103325388	Mir5130	0.71
chr14:104297894-104299054	Rnf219	0.99
chr14:104347252-104347590	Rnf219	0.99
chr14:105898579-105899169	Spry2	0.3
chr14:105900621-105901661	Spry2	0.34
chr14:106319385-106322809	Spry2	0.57
chr14:118400488-118401382	Gpc6	0.079
chr14:118629074-118631864	Tgds	0.98
chr14:118721931-118722309	Tgds	1
chr14:118815112-118816104	Sox21	0.98
chr14:120517681-120519465	Rap2a	0.99
chr14:122623019-122627203	A2ld1	1
chr14:122628214-122628812	Ubac2	1
chr14:122654900-122655540	Tm9sf2	0.22
chr14:122677166-122680809	Tm9sf2	0.41
chr14:122757928-122759081	A2ld1	0.93
chr14:122765072-122767908	Zic2	0.99
chr14:122771359-122790912	A2ld1	0.99
chr14:122799649-122806903	A2ld1	0.99
chr14:122825750-122826895	A2ld1	1
chr14:123119048-123121179	Tm9sf2	0.4
chr14:123279485-123279821	Pcca	0.99
chr14:123280958-123284050	Tm9sf2	0.64
chr14:123381729-123383208	Tm9sf2	0.38
chr14:13017179-13017620	Ptprg	0.72
chr14:13020827-13023838	Ptprg	0.89
chr14:14902573-14903989	Psmd6	0.97
chr14:17032691-17034566	Top2b	0.98
chr14:19159552-19159992	Ube2e1	0.98
chr14:20739120-20740266	2700060E02Rik	0.93
chr14:20804069-20807643	2700060E02Rik	0.98
chr14:21043206-21045601	Kcnk5	1
chr14:21594386-21594916	Ap3m1	0.93
chr14:22071017-22072671	Myst4	0.58
chr14:22221240-22222472	Myst4	0.87
chr14:22352923-22354713	Myst4	0.81
chr14:22488416-22489727	Vdac2	0.44
chr14:23078775-23079043	Zfp503	0.84
chr14:23498804-23499915	Zfp503	0.94
chr14:23564528-23565862	Zfp503	0.96
chr14:24543037-24543895	Rps24	1
chr14:25024256-25025564	Rps24	0.91
chr14:25063999-25065270	Rps24	0.9
chr14:25318916-25320752	Rps24	0.93
chr14:25813097-25815455	Zmiz1	0.88
chr14:25834473-25835932	Ppif	0.27
chr14:25892913-25894695	Zcchc24	0.94
chr14:25927023-25929276	Ppif	0.3
chr14:25929997-25930932	Ppif	0.41
chr14:25947254-25947841	Zmiz1	0.48
chr14:26045358-26046968	Ppif	0.94
chr14:26136033-26139028	Ppif	0.33
chr14:26142792-26143076	Ppif	0.44
chr14:26158092-26158590	Ppif	0.16
chr14:26189884-26191610	Zmiz1	0.57
chr14:26197143-26198679	Ppif	0.3
chr14:26214393-26214946	Ppif	0.3
chr14:26216194-26217779	Ppif	0.32
chr14:26240532-26242072	Ppif	0.21
chr14:26287594-26289303	Zmiz1	0.29
chr14:26289519-26290746	Zmiz1	0.075
chr14:26292268-26293446	Ppif	0.35
chr14:26295537-26296585	Ppif	0.44
chr14:26297799-26299562	Zmiz1	0.67
chr14:26300842-26301253	Zcchc24	0.87
chr14:26311840-26314310	Zmiz1	0.11
chr14:26316837-26318268	Ppif	0.33
chr14:26332183-26333261	Ppif	0.056
chr14:26367607-26368451	Zmiz1	1
chr14:26369287-26370012	Zmiz1	0.06
chr14:26375220-26376873	Ppif	0.28
chr14:26399606-26400091	Ppif	0.34
chr14:26403046-26407939	Ppif	0.29
chr14:26425811-26428715	Ppif	0.33
chr14:26442043-26443906	Ppif	0.14
chr14:26449485-26450718	Zmiz1	0.57
chr14:26452480-26454032	Ppif	0.38
chr14:26455525-26456145	Ppif	0.14
chr14:26585074-26585502	Ppif	0.33
chr14:27726762-27727920	Appl1	0.43
chr14:31943365-31945397	Pbrm1	0.99
chr14:32031151-32031578	Eaf1	0.98
chr14:32472760-32476387	Ankrd28	1
chr14:32482336-32483657	Ankrd28	0.97
chr14:32484832-32485343	Ankrd28	0.98
chr14:33701898-33703264	Mapk8	0.065
chr14:33812809-33813813	Mapk8	0.25
chr14:33867057-33867585	Mapk8	0.49
chr14:34542204-34543690	Mapk8	0.19
chr14:35266483-35268160	Sncg	1
chr14:41768943-41770135	Tspan14	1
chr14:46082363-46083506	Psmc6	0.98
chr14:46184987-46185727	Ero1l	0.96
chr14:47608382-47609766	Cgrrf1	0.12
chr14:48427811-48428942	Socs4	0.99
chr14:48458710-48459311	Socs4	0.99
chr14:48692781-48694352	Socs4	0.99
chr14:48703645-48704676	Fbxo34	0.96
chr14:48706499-48707372	Atg14	0.9
chr14:48790229-48791947	Dlgap5	1
chr14:48826635-48827113	Dlgap5	1
chr14:49048864-49049831	6720456H20Rik	1
chr14:49526620-49527155	Otx2	0.056
chr14:50402570-50403050	3632451O06Rik	1
chr14:52629272-52631412	Zfp219	1
chr14:52632036-52635256	Zfp219	1
chr14:52947098-52948086	Mettl3	1
chr14:54765550-54766318	4931414P19Rik	0.99
chr14:54804683-54805926	Zfhx2	0.99
chr14:55146142-55146870	4931414P19Rik	1
chr14:55476210-55476971	Dhrs4	1
chr14:55543236-55546189	Prmt5	1
chr14:55671154-55674784	Cmtm5	1
chr14:55713510-55714242	4931414P19Rik	1
chr14:55957076-55958162	Dhrs4	1
chr14:56134723-56135309	Cmtm5	1
chr14:56137484-56139623	Pabpn1	1
chr14:56441846-56442711	Cenpj	1
chr14:57907538-57908168	Ift88	0.76
chr14:58325825-58326623	Gm10094	0.95
chr14:58335282-58336675	F630043A04Rik	1
chr14:58351382-58351629	F630043A04Rik	0.96
chr14:59824255-59825161	Rcbtb1	0.98
chr14:60300593-60301148	Mtmr6	0.82
chr14:60456444-60457561	Cdadc1	0.94
chr14:61028507-61029928	Atp8a2	0.68
chr14:61172332-61173811	Spata13	0.065
chr14:61205610-61206515	Spata13	0.19
chr14:61261311-61262843	Spata13	0.12
chr14:61288591-61289897	Spata13	0.34
chr14:61305245-61306550	Spata13	0.21
chr14:61355157-61355882	Spata13	0.18
chr14:61656600-61657335	Tnfrsf19	0.93
chr14:61757302-61757727	Mipep	0.97
chr14:61773349-61774061	Sacs	0.73
chr14:61946453-61947314	Dleu2	0.86
chr14:62960273-62962793	Rnaseh2b	0.99
chr14:63007509-63009405	Rnaseh2b	0.99
chr14:63010872-63012307	Rnaseh2b	0.94
chr14:63034305-63036226	Rnaseh2b	0.95
chr14:63203383-63204653	Wdfy2	0.94
chr14:64745106-64746839	Msra	1
chr14:64757925-64758972	Msra	0.99
chr14:64764623-64766139	Msra	0.99
chr14:64791844-64793081	Msra	0.038
chr14:64795754-64797113	Msra	0.97
chr14:64928610-64929922	Msra	0.95
chr14:65150497-65153780	Msra	0.099
chr14:65738113-65739378	Kif13b	0.95
chr14:65754092-65754993	Kif13b	0.92
chr14:66025223-66026111	Clu	1
chr14:66424799-66425304	Pnoc	0.99
chr14:66937854-66939609	Adra1a	1
chr14:66943511-66944400	Adra1a	0.84
chr14:66963197-66963968	Adra1a	0.96
chr14:66996894-66997651	Adra1a	1
chr14:67042577-67044546	Adra1a	1
chr14:67111585-67114510	Adra1a	1
chr14:67451401-67451879	Adra1a	1
chr14:67859554-67861696	Ppp2r2a	0.98
chr14:67927469-67928489	Ppp2r2a	0.98
chr14:67934293-67934791	Ebf2	0.99
chr14:67936443-67937313	Ebf2	1
chr14:67975913-67976645	Ppp2r2a	0.99
chr14:68168605-68170963	Ppp2r2a	0.99
chr14:70061081-70061669	Loxl2	0.99
chr14:70085435-70086098	Chmp7	0.75
chr14:70938530-70939294	Bmp1	1
chr14:70977273-70978156	Reep4	1
chr14:73216441-73217210	Fndc3a	0.8
chr14:73902661-73903616	Itm2b	0.08
chr14:75267090-75267485	Esd	0.94
chr14:75904649-75905586	Slc25a30	0.96
chr14:76431805-76433713	Tpt1	0.99
chr14:76621072-76621893	Tpt1	1
chr14:76653947-76656418	Tpt1	1
chr14:76932851-76933576	Tsc22d1	0.25
chr14:76998375-76998930	Tsc22d1	0.57
chr14:77016910-77017793	Serp2	0.68
chr14:77027241-77028854	Serp2	0.71
chr14:77078418-77078901	Tsc22d1	0.14
chr14:77139773-77140255	Tsc22d1	0.65
chr14:77164896-77165339	Tsc22d1	0.66
chr14:77191186-77192425	Tsc22d1	0.48
chr14:77655901-77658196	Dnajc15	0.69
chr14:77776734-77778756	Gm10132	0.82
chr14:78201229-78203067	Gm10132	0.91
chr14:78342666-78343394	Dnajc15	0.84
chr14:79602593-79604251	Naa16	0.96
chr14:79605686-79606743	Naa16	0.99
chr14:80360293-80361994	Pcdh8	0.1
chr14:80537914-80539724	Pcdh8	0.048
chr14:86889666-86890477	9630013A20Rik	0.92
chr14:8720734-8722473	Fam107a	1
chr14:9041485-9042035	Pxk	0.98
chr14:98470938-98473325	Dach1	0.27
chr15:101632484-101634847	Eif4b	1
chr15:101837143-101839019	Eif4b	1
chr15:101946283-101948543	Spryd3	0.99
chr15:102036016-102036833	Aaas	1
chr15:102185562-102187017	Zfp740	1
chr15:102340596-102343306	Zfp740	1
chr15:102361738-102363650	Prr13	0.98
chr15:102573313-102578448	Cbx5	0.97
chr15:102936504-102936734	Cbx5	1
chr15:103129670-103132607	Cbx5	1
chr15:103134761-103136587	Cbx5	0.97
chr15:103343786-103345483	Cbx5	0.92
chr15:103348361-103350929	Cbx5	0.98
chr15:12151896-12153420	Tars	1
chr15:12295632-12296440	Zfr	0.89
chr15:25603107-25606984	Zfp622	0.38
chr15:25609895-25610525	Zfp622	0.55
chr15:25619343-25620559	Zfp622	0.76
chr15:25625124-25626619	Myo10	0.95
chr15:25635063-25635779	Myo10	0.97
chr15:25643629-25644310	Myo10	0.78
chr15:25645211-25646378	Myo10	1
chr15:25691020-25693042	Zfp622	0.81
chr15:25844519-25846534	Myo10	0.54
chr15:27418002-27418532	Ank	0.39
chr15:27425470-27426106	Ank	0.67
chr15:27712880-27713996	Fam105b	1
[truncated: 3,816 more rows]

## Sheet: Genes
Ppip5k2
Kdsr
Arfgef1
Mki67ip
Gli2
2900060B14Rik
Clasp1
2610027F03Rik
Actr3
Nckap5
Zranb3
Cxcr4
Mcm6
Dars
Slc41a1
Rbbp5
Nuak2
Tmcc2
Nucks1
Sox13
Mdm4
Snrpe
Ppp1r15b
Btg2
Adipor1
Tmem183a
Ppp1r12b
Ube2t
Ipo9
Rnpep
Timm17a
Gpr37l1
Camsap2
Tmem9
Lhx9
B3galt2
1700025G04Rik
Rnf2
Arpc5
Lamc1
Rgs16
Dhx9
Ier5
Stx6
Qsox1
Soat1
Tor1aip1
Ralgps2
Gm15428
2810025M15Rik
Rfwd2
Tnr
Mrps14
Prdx6
Prrc2c
BC055324
Pou2f1
Uck2
Pogk
Tmco1
Pbx1
Jph1
Uap1
Atf6
Apoa2
Vangl2
Pex19
Gm15431
Igsf8
Igsf9
Cadm3
Zfp238
Akt3
Sdccag8
Parp1
H3f3a
Lin9
Lbr
Degs1
Capn2
Enah
Bpnt1
Tgfb2
Gpatch2
Kctd3
Gm3837
Cenpf
Prox1
Tatdn3
Ints7
Angel2
Nsl1
Vash2
Rcor3
Sertad4
Cd34
Plxna2
Tfap2b
Mcm3
Kcnq5
Ogfrl1
Bai3
Lmbrd1
Imp4
Uggt1
Tsga10
Actr1b
Aff3
Chst10
Map4k4
2610017I09Rik
AI597479
Pou3f3
Nck2
Obfc2a
Myo1b
Sgol2
Clk1
Ndufb3
Orc2
Sumo1
Nif3l1
Gm11575
Fastkd2
Creb1
Zdbf2
Ndufs1
Acadl
Rpe
Rb1cc1
Cps1
Atic
Fn1
Xrcc5
Smarcal1
Rpl37a
Igfbp5
1810031K17Rik
Epha4
Pax3
Acsl3
Rhbdd1
Mff
Cab39
Psmd1
Dis3l2
Dgkd
Arl4c
Agap1
Cxcr7
Ilkap
Myeov2
Ramp1
Ppp1r7
St8sia4
Vcpip1
Tmtc2
Ppfia2
Shprh
Csrp2
Zdhhc17
Nap1l1
Kcnmb4
Cnot2
Nup107
Dyrk2
Cand1
Hmga2
Tbc1d30
Llph
Tmbim4
Gns
Rassf3
Tbk1
Ppm1h
Mon2
Lrig3
Mettl1
Zbtb39
Prim1
Tsfm
Naca
Rab5b
Cnpy2
Plagl1
Baz2a
Atp5b
Neurod4
Hivep2
Adat2
3110003A17Rik
Reps1
Txlnb
Olig3
Gm6251
Sgk1
Tbpl1
1110021L09Rik
Ctgf
Med23
Tube1
Cdk19
Cdc40
Foxo3
Cep57l1
Sec63
Cd24a
Prep
Asf1a
Gm9766
Fam184a
P4ha1
Ranbp2
Cbara1
Fbxo5
Slc29a3
Unc5b
Tbata
Tspan15
Ccar1
Akap12
Reep3
Jmjd1c
Arid5b
Ank3
Cdk1
Phyhipl
Tfam
Zwint
Specc1l
Smarcb1
Col6a2
Col6a1
Ddt
S100b
Ube2g2
Col18a1
1810008A18Rik
Katna1
Pfkl
Agpat3
Slc1a6
Midn
Mrpl54
Dazap1
Tcf3
Mob3a
Med16
Slc39a3
Uqcr11
Btbd2
Sgta
Nfyb
D10Wsu102e
Nuak1
Rfx4
Nup43
D10Wsu52e
Timp3
Ascl1
Nup37
Scyl2
Actr6
Tmpo
Slc25a3
Nedd1
Snrpf
Elk3
Nr2c1
4932415G12Rik
Metap2
Fgd6
Tmcc3
Socs2
Btg1
Acly
Nbr1
1700113I22Rik
Brca1
Psmc3ip
Plekhh3
Rdm1
Mpp3
Slc4a1
Hdac5
Nmt1
Adam11
Ccdc43
Gjc1
Gosr2
1700081L11Rik
Taco1
Limd2
Map3k3
Pecam1
Kpna2
Snord104
Psmd12
Apoh
Axin2
Wipi1
Sox9
Slc39a11
Cdc42ep4
D11Wsu47e
Rpl38
Btbd17
Mrps7
Fam100b
Mrpl38
Srp68
Grb2
2310067B10Rik
Sec14l1
Srsf2
1110005A03Rik
Syngr2
Fignl1
Cyth1
Cant1
Engase
Socs3
Eif4a3
2410002I01Rik
Aatk
Slc38a10
Bahcc1
Alyref
Mafg
2810442I21Rik
Egfr
Meis1
Spred2
Sertad2
Vps54
Bcl11a
Ccdc104
Bod1
Asb3
Erlec1
Hba-x
Zmat5
Drg1
Fbxw11
Ranbp17
Npm1
Fam196b
Rars
Ccdc99
Pank3
Uqcr10
Mtfp1
Pttg1
Slu7
Ttc1
Clint1
Thg1l
Tbc1d10a
Gm12183
Trim41
Gnb2l1
Cnot6
3010026O09Rik
Zfp454
Hnrnpab
Emid1
Rad50
Fnip1
Cdc42se2
Gpx3
Slc36a1
Fam114a2
Gm9900
Hist3h2bb-ps
Purb
2310033P09Rik
4933439F18Rik
Alkbh5
Cops3
B9d1
H2afv
Rnf112
Map2k3
Specc1
Zfp286
Tmed4
Hs3st3b1
Zmiz2
2810001G20Rik
Arhgap44
Tbrg4
Adcy1
Myh10
Ndel1
Trappc1
Chd3
Tmem107
Pfas
1810027O10Rik
Trp53
Aurkb
Pfn1
Med11
Wscd1
Tax1bp3
Tmem93
Ankfy1
1200014J11Rik
Slc13a5
Mettl16
Fam101b
Ywhae
Pipox
Ccdc55
Rpl23a
Traf4
Vtn
Fam58b
Atad5
1700071K01Rik
Psmd11
Tmem98
Zfp830
Aatf
Synrg
Lhx1
Ddx52
Dusp14
Hus1
Ints2
Prr11
Dhx40
Mtmr4
Dynll2
Srsf1
Vezf1
Coil
Akap1
Stxbp4
Car10
Tob1
Ankrd40
Spag9
Mrpl10
Ppp1r9b
Sp2
Snf8
Npepps
Kpnb1
Igf2bp1
Cbx1
Lrrc59
Socs7
1810046J19Rik
Neurod2
Psmd3
Igfbp4
Krt222
Smarce1
Eml5
Tdp1
Foxn3
Zc3h14
Calm1
Ccdc88c
Cpsf2
Lgmn
Ubr7
D230037D09Rik
Btbd7
Papola
Vrk1
Bcl11b
Eml1
Yy1
Wars
LOC640611
Hsp90aa1
Ppp2r5c
Wdr20a
Cdca4
Zfyve21
Brf1
Siva1
Cdc42bpb
Bag5
Eif5
Akt1
Zfp386
Gen1
Vsnl1
Smc6
Mycn
Ddx1
Nbas
E2f6
Rrm2
Klf11
Sox11
Rps7
Tssc1
Rnaseh1
Gpr22
Hbp1
Dnmt3a
Twistnb
Snx13
Tspan13
Rab10
1110002L01Rik
Ncoa1
Dock4
Zfp277
Apob
Rhob
1110057K04Rik
G2e3
Scfd1
Hectd1
Ap4s1
Nubpl
1110002B05Rik
Psma6
Nfkbia
Mdga2
Trim9
Rpl36al
Sav1
Dact1
2700049A03Rik
1810048J11Rik
Ppm1a
Hif1a
Syne2
Akap5
Fut8
Tmem229b
Zfp36l1
Rdh11
3830431G21Rik
Erh
4933426M11Rik
Cox16
Dpf3
Ptgr2
2410016O06Rik
Acyp1
Eif2b2
Fos
1700019E19Rik
Ttll5
1700020O03Rik
0610007P14Rik
Ahsa1
2310044G17Rik
Sdc1
Flrt2
Galc
Kcnk10
Tnpo1
Mtap1b
Gm6115
Pik3r1
Mast4
Rgs7bp
Ppwd1
Srek1ip1
Zswim6
Pde4d
Plk2
Rab3c
Map3k1
Gpbp1
Snx18
Arl15
Hcn1
Mtr
Paip1
Gli3
Rala
Zfp187
Hist1h2ad
Acot13
Hist1h4a
Gmnn
Sox4
Gm11362
Serpinb6a
Psmg4
Cdyl
Rpp40
Prpf4b
Bphl
Ly86
Nrn1
Gm4024
Lyrm4
Snrnp48
Tfap2a
Pak1ip1
Nedd9
Dtnbp1
Ccdc90a
Tbc1d7
Ranbp9
Atxn1
Nup153
Dek
Id4
Phf2
Cenpp
Bicd2
1110007C09Rik
Cks2
Secisbp2
Gadd45g
Sema4d
Sptlc1
Sfxn1
Lman2
Mxd3
Ddx41
Nsd1
Tgfbi
Neurog1
5133401N09Rik
Ubqln1
Agtpbp1
Golm1
Naa35
Gas1
Zcchc6
0610007P08Rik
Net1
Med10
Ndufs6
Mrpl36
Irx1
Irx2
Ankrd32
Gpr98
Tmem161b
C130071C03Rik
Atg10
Papd4
Ankrd34b
Otp
Wdr41
Scamp1
F2r
Enc1
Mrps27
Mir5130
Rnf219
Spry2
Gpc6
Tgds
Sox21
Rap2a
A2ld1
Ubac2
Tm9sf2
Zic2
Pcca
Ptprg
Psmd6
Top2b
Ube2e1
2700060E02Rik
Kcnk5
Ap3m1
Myst4
Vdac2
Zfp503
Rps24
Zmiz1
Ppif
Zcchc24
Appl1
Pbrm1
Eaf1
Ankrd28
Mapk8
Sncg
Tspan14
Psmc6
Ero1l
Cgrrf1
Socs4
Fbxo34
Atg14
Dlgap5
6720456H20Rik
Otx2
3632451O06Rik
Zfp219
Mettl3
4931414P19Rik
Zfhx2
Dhrs4
Prmt5
Cmtm5
Pabpn1
Cenpj
Ift88
Gm10094
F630043A04Rik
Rcbtb1
Mtmr6
Cdadc1
Atp8a2
Spata13
Tnfrsf19
Mipep
Sacs
Dleu2
Rnaseh2b
Wdfy2
Msra
Kif13b
Clu
Pnoc
Adra1a
Ppp2r2a
Ebf2
Loxl2
Chmp7
Bmp1
Reep4
Fndc3a
Itm2b
Esd
Slc25a30
Tpt1
Tsc22d1
Serp2
Dnajc15
Gm10132
Naa16
Pcdh8
9630013A20Rik
Fam107a
Pxk
Dach1
Eif4b
Spryd3
Aaas
Zfp740
Prr13
Cbx5
Tars
Zfr
Zfp622
Myo10
Ank
Fam105b
Dap
Ubr5
Zfp706
Klf10
Gm7194
Zfpm2
Angpt1
Eif3h
Ext1
Enpp2
9130401M01Rik
Atad2
Tmem65
Sqle
Ndufb9
E430025E21Rik
Asap1
Efr3a
Khdrbs3
Peg13
Slc45a4
Ptk2
4930572J05Rik
Gsdmd
Zfp41
Lynx1
Gm19945
BC024139
Puf60
Scrt1
Bop1
1110038F14Rik
Ift27
Pvalb
Mfng
Eif3d
Ddx17
Dnalc4
Csnk1e
Atf4
Adsl
Phf5a
Rangap1
Tob2
Poldip3
Cenpm
Ndufa6
Cyb5r3
Srebf2
Scube1
Parvb
Pnpla3
Ttll12
Phf21b
Cerk
Nup50
Wnt7b
Fam19a5
Tbc1d22a
Ppp6r2
Creld2
Chkb
Kif21a
Gm8759
Nell2
Arid2
Col2a1
Pfkm
Tuba1b
Racgap1
Dip2b
Prph
Rnd1
Slc11a2
Troap
Litaf
Fgd4
Slc25a1
Arvcf
Map6d1
Polr2h
Igf2bp2
Gm4943
1300002E11Rik
St6gal1
Lpp
Atp13a3
Hes1
Fam43a
Lsg1
Ncbp2
1500031L02Rik
Pigx
Gm20056
Rnf168
Pcyt1a
Rpl35a
Umps
Heg1
Kalrn
Sec22a
Sema5b
Dirc2
Hspbap1
Lrrc58
Stxbp5l
Fstl1
Gtf2e1
4930455C21Rik
Lsamp
Naa50
Zbtb20
Atp6v1a
Spice1
Boc
Glis2
Tagln3
Nmral1
Ift57
Bbx
Cblb
Rogdi
Dnaja3
Robo1
Robo2
2810055G20Rik
Btg3
Atp5j
Gabpa
Adamts1
Bach1
Tiam1
Gart
2610039C10Rik
1110004E09Rik
Donson
Atp5o
Itsn1
Slc5a3
Nubp1
Cbr1
Ets2
Brwd1
Prdm15
Pcp4
Agpat4
Plg
Sod2
Mllt4
1600012H06Rik
Dll1
Lix1
Pdpk1
Spsb3
Hn1l
Ube2i
Gm8186
Atp6v0e
Neurl1b
Nudt3
Rps10
Fkbp5
Kctd20
Ppil1
Mdga1
Rnf8
Zfand3
U2af1
Pde9a
Wdr4
Zfp799
Notch3
Zfp101
H2-K1
Ddah2
Pbx2
Mrps18b
Ier3
Arid1b
Supt3h
Enpp5
Mrps18a
Mrpl14
Slc29a1
Vegfa
Ppp2r5d
Polr1c
Xpo5
Ccnd3
Nfya
Daam2
AI314976
Rftn1
Tfb1m
Sgol1
Rab5a
Dpp9
Uhrf1
Fem1a
Plin3
Safb
2410015M20Rik
Mllt1
Rfx2
Tulp4
5730437N04Rik
Dynlt1b
Pja2
Twsg1
Rab31
ORF19
Gm4705
Lama1
Rps6ka2
Ezr
Dlgap1
Tgif1
Ndc80
Lbh
Lclat1
Birc6
Dpy30
1110001A16Rik
Hnrpll
Srsf7
Thumpd2
Tmem178
Gm6594
Cox7a2l
Zfp36l2
Ppm1b
Prkce
Qk
Ston1
Foxn2
Gm10184
Mib1
Rbbp8
3110002H16Rik
Zfp521
Gm10036
Cdh2
Rprd1a
Gpr17
D0H4S114
Kif20a
Cdc23
Srp19
Epb4.1l4a
Ctnna1
Lrrtm2
Ndufa2
Sra1
Ube2d2
Eif4ebp3
0610010O12Rik
Pura
Slc35a4
Taf7
Gm19774
Arhgap26
0610009O20Rik
Ppp2r2b
Dcp2
Gm3650
Tmed7
Sema6a
Tnfaip8
Kif5b
Snx2
Ppic
Zeb1
Csnk1g3
Zfp608
Svil
Aldh7a1
Gramd3
C330018D20Rik
Phax
9430020K01Rik
Ndst1
Rbm22
Adrb2
Fbxo38
Onecut2
Nedd4l
Zfp532
Sec11c
Lman1
Seh1l
Spire1
Rnmt
Tcf4
Mex3c
Dcc
Cxxc1
Me2
Smad7
BC031181
Rab18
Skor2
Ier3ip1
Rnf165
Adnp2
Pard6g
Ctdp1
Txnl4a
Zfp407
Zadh2
Cyb5
Thoc1
Fen1
Prpf19
Tmem109
Tle4
Gnaq
D030056L22Rik
Zfand5
Tmem2
Klf9
Smc5
Cbwd1
Cdc37l1
D19Bwg1357e
Uhrf2
Glis3
Rfx3
Eif1ad
Ppp1r3c
Tnks2
Noc3l
Sorbs1
Aldh18a1
Ccnj
Lcor
Arhgap19
D19Ertd386e
Ppp6r3
Cwf19l1
Coro1b
Lzts2
Dpcd
Pprc1
Cuedc2
Sfr1
Sart1
Sh3pxd2a
Usmg5
Taf5
Ndufs8
Dusp5
Nutf2-ps1
Add3
Pdcd4
Bbip1
Scyl1
Ablim1
Atrnl1
Tm7sf2
Nhlrc2
Pola2
Gfra1
Arl2
Sf1
Atg2a
Trmt112
Gpr137
AI846148
Stip1
Rcor2
Snhg1
Ldlrad3
Apip
Traf6
Caprin1
Abtb2
D430041D05Rik
Tcp11l1
Pin1-ps1
Immp1l
2700007P21Rik
Kif18a
Ccdc34
Lgr4
Scg5
Actc1
Meis2
Aqr
Fam98b
Disp2
D2Ertd750e
Bub1b
Rad51
Pdia3
Rpap1
Rtf1
Cdan1
Lrrc57
Snap23
Spg11
Shf
Dut
Myef2
Slc30a4
Slc27a2
Ckap2l
Slc20a1
Bub1
Cdc25b
Pank2
Pcna
Trmt6
Chgb
Vim
Plcb1
2210009G21Rik
Btbd3
Flrt3
Snrpb2
Crnkl1
Insm1
Naa20
Gzf1
Nxt1
Tmem90b
Gins1
Acss1
Gm14166
Scrt2
Mcts2
Id1
Bcl2l1
Tpx2
Necab3
Gm20094
Plagl2
Mapre1
Dusp15
E2f1
Pxmp4
Raly
Itch
Gm14217
Romo1
Uqcc
Trpc4ap
Mmp24
Scand1
Gm14173
Rbm39
Rbl1
9830001H06Rik
Gm14277
Rpn2
Gm14279
Gm14176
Ctnnbl1
Rprd1b
Vstm2l
Mafb
Top1
Chd6
Ift52
Mybl2
Pkig
Eya2
Zfp334
Ncoa5
Spata2
1500012F01Rik
Cse1l
Rnf114
Ncoa3
Ptpn1
Adnp
Aurka
Cstf1
Slmo2
Stx16
Pck1
Th1l
Lsm14b
Psma7
2810030E01Rik
Phactr3
Ppdpf
Ythdf1
Sox18
Ptf1a
Thnsl1
Arhgap21
Gm13342
Tprn
Grin1
Pmpca
Ubac1
Notch1
Dnlz
Med22
Surf2
Dbh
Rxra
Barhl1
Gtf3c4
Rapgef1
Setx
6530402F18Rik
Med27
Sh3glb2
Nup188
Mettl11a
Ier5l
Fnbp1
Ciz1
Swi5
Golga2
1110008P14Rik
Fubp3
Cdk9
Rpl12
Suv39h2
Hspa5
Pbx3
Mapkap1
Fam107b
Dab2ip
Mrrf
Zbtb26
Zbtb6
Dennd1a
Lhx2
Psmb7
Prpf18
Zeb2
Acvr2a
Optn
Orc4
Epc2
Rnd3
Rif1
Arl5a
Upf2
Arl6ip6
Fmnl2
Rprm
Cdc123
Nr4a2
Pkp4
Baz2b
Usp6nl
Ttc21b
Stk39
Celf2
Spc25
Mettl5
Tlk1
Cdca7
LOC675589
Lnp
Gm13654
Nfe2l2
Hnrnpa3
Neurod1
Ube2e3
Ube2l6
Clp1
Aplnr
Celf1
F2
Mdk
Dgkz
Pex16
Slc35c1
Hsd17b12
Ttc17
Tspan18
2810002D19Rik
Trp53i11
Api5
Fam46c
Ttf2
Man1a2
Gdap2
Atp1a1
Nhlh2
Csde1
Cttnbp2nl
Phtf1
Slc16a1
Ddx20
Rap1a
6530418L21Rik
Gpsm2
Celsr2
Sort1
Psrc1
Ampd2
Slc25a24
Sass6
Vcam1
Ptbp2
Cnn3
Dnttip2
Neurog2
Ostc
Aimp1
Cxxc4
H2afz
Rap1gds1
Pdlim5
Cyr61
Rpf1
Gng5
Eltd1
Dnajb4
Fubp1
Slc44a5
Fpgt
Bhlhe22
Ect2
Eif5a2
Zmat3
Sox2
Mccc1
Spry1
Ankrd50
Hspa4l
Slc7a11
Ndufc1
Setd7
Naa15
Zfhx4
Postn
Fam48a
Spg20
Rfxap
Nbea
Mbnl1
Igsf10
Plch1
Tiparp
Ppm1l
Kpna4
Ppid
Fnip2
D930015E06Rik
Rps3a
Mab21l2
Etv3
Mrps28
Crabp2
Nes
Cct3
Gm10704
Paqr6
Fdps
Thbs3
Mrpl24
Arhgef2
Lamtor2
Ubqln4
Ilf2
Ints3
Hax1
Celf3
Tdrkh
Ecm1
Mcl1
Scnm1
Sf3b4
Psmd4
Fmo5
Polr3c
Fabp5
Hsd3b6
Sec22b
Ror1
Jak1
Cachd1
Usp24
Mrpl37
Ssbp3
Hspb11
Dmrtb1
Pars2
Lrrc42
Tmem48
Yipf1
2010305A19Rik
Zcchc11
Orc1
Nrd1
2610301B20Rik
Faf1
Elavl4
Dmbx1
Pomgnt1
Gm13015
Urod
Toe1
Rnf220
Med8
Elovl1
Zfp691
Hivep3
Nfyc
Ctps
Dem1
Rlf
Mycl1
Cap1
Utp11l
Pou3f1
Fhl3
Mrps15
Clspn
BC003266
Zmym6
Zfp362
Phc2
Trim62
Rnf19b
Ak2
Rbbp4
Tmem39b
Ptp4a2
Pef1
Bai2
Khdrbs1
Epb4.1
Nudc
Med18
Phactr4
Tmem222
Rpa2
Dnajc8
Gpn2
Tmem57
2610002D18Rik
Dhdds
Hmgn2
Syf2
Kdm1a
Hnrnpr
Luzp1
Rpl11
C1qa
C1qb
Zbtb40
Gm11847
Alpl
Ece1
Mrto4
Igsf21
Rcc2
Mfap2
Necap2
Sdhb
Arhgef10l
Ddi2
Plekhm2
B330016D10Rik
Pdpn
Prdm2
Gm13141
Tardbp
Plod1
Casz1
Tmem55a
Exosc10
Gm13072
Kif1b
Slc25a33
Errfi1
Dnajc11
Hes3
Icmt
Pex10
Hes5
2610002J02Rik
AW011738
Dvl1
Ggh
Ccnc
Pou3f2
Map3k7
Bach2
Casp8ap2
Akirin2
3110043O21Rik
Mob3b
Gm11787
Ube2r2
Chmp5
Smu1
Rmrp
B230312A22Rik
Pax5
Gm12481
Anp32b
Exosc3
Ncbp1
Tmod1
Gabbr2
Tgfbr1
5730528L13Rik
2810432L12Rik
Abca1
Slc44a1
Tal2
Fktn
Zfp462
Akap2
Ubxn2b
1110054O05Rik
Cdc26
Mup3
Alad
Ambp
Astn2
Tox
Tle1
3110001D03Rik
Nfib
Zdhhc21
Psip1
Mpdz
Snapc3
Sh3gl2
Haus6
Gm11810
Slc24a2
Klhl9
Rab2a
Chd7
Elavl2
Tm2d1
Nfia
E130114P18Rik
Usp1
Rasgef1b
Hnrpdl
Enoph1
Hnrnpd
Mapk10
Ptpn13
BC005561
Gm10196
Zfp326
Barhl2
Cdc7
Rpl5
Cplx1
Atp5k
Pcgf3
Ulk1
Pus1
Pitpnb
Mn1
Sez6l
Sart3
Iscu
Msi1
Dynll1
Coq5
Gltp
Ankrd13a
Mlec
Pop5
Kctd10
Srrm4
Prkab1
Nos1
2410131K14Rik
Fbxw8
Lhx5
Ddx54
Fam109a
Erp29
Ppp1cc
Ift81
Arpc3
Camkk2
Gtf2h3
Setd8
2810006K23Rik
Hip1r
Tmed2
Cdk2ap1
Bcl7a
Kntc1
Diablo
Gm19601
Denr
Aacs
Zfp664
Atp6v0a2
Ubc
Fzd10
Slc15a4
Ran
Cct6a
Gbas
Tyw1
Auts2
Gtf2i
Tbl2
Wbscr22
Eln
Rfc2
Mdh2
Pom121
Rabl5
Cux1
Srrt
Adap1
Heatr2
Uncx
Mad1l1
Eif3b
Gna12
Mmd2
Tnrc18
Actb
Grid2ip
Ccz1
Bud31
Bri3
Wasf3
Gtf3a
Lnx2
Ubl3
Hmgb1
Uspl1
Fry
Rfc3
Cacna2d1
Ptpn12
Pmpcb
Srpk2
Orc5
Dnajc2
Abcf2
Xrcc2
Galnt11
En2
Paxip1
Rbm33
0610007C21Rik
Ost4
Tyms
Fam59b
Krit1
Ppp1cb
Zfp513
Pisd
Depdc5
Zfp512
Fam133b
Gm5553
Fam193a
Tacc3
Letm1
Mxd4
Gm10059
Tmem129
2310079F23Rik
Grpel1
Afap1
Wfs1
Acox3
Cno
Man2b2
Mrfap1
Ppp2r2c
Msx1
Tmem128
Hs3st1
Cpeb2
Prom1
Tapt1
Ldb2
Slit2
Gpr125
Cdk14
Dhx15
Anapc4
Pgm1
Klf3
Klhl5
Apbb2
Phox2b
Ociad1
Slain2
Rasl11b
Fip1l1
Pdgfra
Kit
Aasdh
Ppat
Mob1b
Ccng2
4930420K17Rik
Bmp2k
Gm3470
Ppp4r2
Pdzrn3
Lrrn1
Srgap3
Tada3
Atp2b2
Sec13
Raf1
Atg7
Timp4
Tmcc1
Plxnd1
Zfp239
Hnrnpf
Zfp637
Zfp9
Adipor2
Dcp1b
Fbxl14
Cecr2
Gm10224
Chd4
Cdca3
Ing4
Cops7a
Cd9
Ccnd2
5930416I19Rik
Foxm1
Gpr19
Dusp16
Ddx47
8430419L09Rik
Wbp11
Dera
Lmo3
Aebp2
Slco1b2
Golt1b
Pyroxd1
Slco1c1
Sox5
Bcat1
Lyrm5
Tm7sf3
Mrps35
Far2
Tes
Tspan12
Rbm28
Snd1
Gcc1
Klhdc10
Smo
Tnpo3
Impdh1
Copg2
Tsga14
Gm6644
Slc35b4
1810058I24Rik
Ptn
Zc3hav1l
Hipk2
Luc7l2
Ssbp1
Ezh2
Zfp212
Pdia4
Mpp6
Hnrnpa2b1
Snx10
Cbx3
Hibadh
Peg10
Creb5
Plekha8
Pigy
Mad2l1
Gng12
Usp39
0610030E20Rik
Tgoln2
Tcf7l1
Ctnna2
AW146020
Rpa3
Mob1a
Dguok
Ica1
Zfml
Snrpg
Fam136a
Gm9769
Pcyox1
Pcbp1
Aak1
Mxd1
Rpn1
Cnbp
Ruvbl1
Abtb1
Mcm2
Aldh1l1
Hdac11
Nup210
Xpc
C130022K22Rik
Prickle2
Uba3
Frmd4b
Foxp1
Odz4
Ints4
1810020D17Rik
Ndufc2
2210018M11Rik
Serpinh1
Klhl35
Rps3
Arrb1
Rnf169
Spcs2
Pgm2l1
Nup98
Rhog
Mrpl17
Ilk
Syt9
Eif3f
Rpl27a
Wee1
Rnf141
Dennd5a
Ctr9
1700012D14Rik
Tead1
Parva
Arntl
Pde3b
Psma1
1110004F10Rik
Rps13
Plekha7
Rps15a
Tmc7
Gprc5b
2310008H09Rik
Mettl9
Cog7
Prkcb
Plk1
Ndufab1
Arhgap17
Nsmce1
Gtf3c1
Tufm
Ppp4c
Bola2
Gm4532
Kif22
Tbc1d10b
Prss36
Chmp2a
Inpp5f
Tial1
Mcmbp
Wdr11
Fgfr2
Nsmce4a
Htra1
Bub3
Oat
Chst15
Fam53b
Fam175b
2700050L05Rik
Ctbp2
Ebf3
Glrx3
Tcerg1l
Dpysl4
Inpp5a
Msx3
Cyp2e1
Rplp2
Eps8l2
Tspan4
Cd151
Mrpl23
Th
Tssc4
Cdkn1c
Fgf15
Dhcr7
Meis3
Zc3h4
Ppp5c
Sympk
Ercc2
Xrcc1
Cadm4
Gsk3a
Erf
2310022A10Rik
Dll3
Timm50
Supt5h
Lrfn1
Hnrnpl
Eif3k
Ppp1r14a
Sipa1l3
Dpf1
Fxyd1
Uba2
Lsm14a
Kctd15
Ccdc123
Chst8
Pop4
Zfp507
Ccne1
Cnot3
Ube2s
Gm6887
Suv420h2
Nr1h2
Irf3
Rpl13a
Dbp
Rpl18
Sergef
Tsg101
Zdhhc13
Nav2
Nell1
Fancf
Slc17a6
[truncated: 261 more rows]
