# Supplementary material for: Temporal analysis of enhancers during mouse cerebellar development reveals dynamic and novel regulatory functions
Source: eLife. 2022 Aug 9;11:e74207. doi: 10.7554/eLife.74207 (PMC9398453; doi:10.7554/eLife.74207)
Supplement: Supplementary file 6. — The rightmost column indicates whether the putative target gene has been previously implicated in cerebellar development. [file elife-74207-supp6.xlsx]

## Sheet: Sheet1
Robust Cerebellar Enhancer with Pax3 motif	Putative Target Gene	Implicated in Cerebellar Development
chr11:119017630-119018735	N/A	N/A
chr9:65591807-65593365	Rbpms2	no
chr15:102340596-102343306	Zfp740	no
chr9:99529731-99530882	N/A	N/A
chr13:34363063-34364398	Psmg4	no
chr2:173078688-173080426	Pck1	no
chr5:3151239-3152733	Krit1	no
chr2:161164455-161165800	Chd6	no
chr7:126134753-126138622	2310008H09Rik	no
chr7:71804073-71805230	Fan1	no
chr18:83078927-83084710	N/A	N/A
chr2:33491344-33492917	N/A	N/A
chr5:30718746-30719907	Ost4	no
chr11:67958100-67960172	Myh10	yes
chr8:111774867-111776652	Zfhx3	no
chr11:35669213-35671441	Rars	no
chr10:69601341-69603137	Cdk1	no
chr2:30571795-30581999	Ier5l	no
chr9:65039517-65039937	2010321M09Rik	no
chr17:13814288-13816070	Mllt4	no
chr2:154246468-154248345	Mapre1	no
chr7:144432951-144439006	Ebf3	no
chr8:106585767-106586674	Gm8730	no
chr10:67568640-67570408	Arid5b	no
chr6:114863766-114865020	Raf1	no
chr11:34197589-34198200	Fam196b	no
chr6:128078031-128080863	5930416I19Rik	no
chr13:59141608-59142985	Golm1	no
chr13:108329997-108332449	Zswim6	no
chr12:88164406-88165867	Ahsa1	no
chr16:77384563-77385169	2810055G20Rik	no
chr13:44846302-44848305	Dtnbp1	no
chr13:72952559-72955180	Irx2	no
chr5:24206142-24207245	Xrcc2	no
chr2:82971524-82972361	N/A	N/A
chr4:23921004-23922073	Pou3f2	no
chr10:17197771-17200008	3110003A17Rik	no
chr10:68674792-68676570	Arid5b	no
chr3:145981469-145982313	Rpf1	no
chr9:16109152-16110269	Chordc1	no
chr1:178922663-178929815	Akt3	yes
chr9:107332626-107333496	Hyal2	no
chr14:64851633-64853274	N/A	N/A
chr1:9737494-9738436	Vcpip1	no
chr5:65038505-65039961	Pgm1	no
chr4:148410110-148411221	Tardbp	no
chr18:36075577-36081479	Sra1	no
chr11:6371034-6371995	H2afv	no
chr4:136304855-136309010	Zbtb40	no
chr7:56218908-56222203	N/A	N/A
chr5:132770457-132770951	N/A	N/A
chr13:100053846-100055252	Tnpo1	no
chr11:98824962-98833205	N/A	N/A
chr19:14946270-14946854	Tle4	no
chr1:181162044-181162784	N/A	N/A
chr13:43598539-43599477	Dtnbp1	no
chr5:112152960-112154768	Mn1	no
chr10:90644253-90645275	Tmpo	no
chr10:69581942-69584162	Cdk1	no
chr19:48043641-48044346	N/A	N/A
chr11:88121642-88125336	Coil	no
chr18:55706239-55710130	Csnk1g3	no
chr12:29732687-29734840	Rps7	no
chr6:60992552-60994324	N/A	N/A
chr12:72673259-72674345	2700049A03Rik	no
chr11:84244344-84245993	Lhx1	no
chr7:146259978-146264483	Dpysl4	no
chr2:14828766-14829896	Vim	yes
chr14:61172332-61173811	Spata13	no
chr4:132514759-132515883	Phactr4	no
chr10:119127519-119130195	N/A	N/A
chr1:194677129-194678751	Sertad4	no
chr17:9771772-9773879	N/A	N/A
chr11:84398509-84401204	Lhx1	no
chr9:41133938-41136051	2610203C20Rik	no
chr5:111452280-111455177	Ulk1	no
chr12:84825940-84828664	N/A	N/A
chr4:32616499-32620451	Bach2	no
chr19:8786982-8788641	Snhg1	no
chr12:71468167-71469293	Sav1	no
chr18:72496346-72497630	Mex3c	no
chr14:98470938-98473325	Dach1	no
chr8:94885374-94889903	4933436C20Rik	no
chr12:109478067-109480691	N/A	N/A
chr11:20539924-20540926	Sertad2	no
chr11:24185281-24187650	Bcl11a	no
chr6:36747115-36747824	1810058I24Rik	no
chr1:74897989-74898555	1810031K17Rik	no
chr2:13096392-13098215	N/A	N/A
chr9:48543852-48545603	Zw10	no
chr13:70482447-70484320	Med10	no
chr2:102501325-102504802	Traf6	no
chr2:140492773-140495304	Flrt3	no
chr1:91337578-91338580	Agap1	no
chr8:90208308-90209965	Zfp423	yes
chr2:27199240-27200116	Surf2	no
chr7:116334633-116336228	N/A	N/A
chr4:8847146-8848025	Gm11810	no
chr10:75381010-75381928	Smarcb1	yes
chr6:120061940-120063190	Fbxl14	no
chr13:15576635-15579622	Gli3	yes
chr12:17070543-17071180	E2f6	no
chr5:45673992-45674580	Ldb2	no
chr8:127859524-127860791	Sipa1l2	no
chr8:114239757-114243155	Adat1	no
chr6:50725541-50729283	N/A	N/A
chr2:44970471-44973137	Zeb2	no
chr3:80848452-80849701	N/A	N/A
chr18:55174225-55176938	Csnk1g3	no
chr1:122510201-122512159	2610027F03Rik	no
chr9:72486437-72489192	N/A	N/A
chr11:120084803-120087163	Eif4a3	no
chr8:123072123-123075284	Mbtps1	no
chr8:97766107-97768288	Ciapin1	no
chr7:87338768-87339679	Prc1	no
chr9:62328512-62329360	Kif23	no
chr7:75299539-75300583	Igf1r	no
chr7:80353528-80354420	Rgma	no
chr8:120670923-120672552	N/A	N/A
chr2:32028736-32031801	Swi5	no
chr5:15508045-15511531	Cacna2d1	no
chr2:157576692-157578543	Gm14176	no
chr5:140698871-140700452	Mad1l1	no
chr6:51541594-51543988	Hnrnpa2b1	no
chr18:64173492-64174827	Onecut2	no
chr7:71984548-71986766	N/A	N/A
chr11:109060448-109061496	Axin2	no
chr18:35641786-35642990	Ctnna1	no
chr2:135933251-135934997	N/A	N/A
chr8:26653631-26656065	N/A	N/A
chr3:115334648-115335586	N/A	N/A
chr3:54769079-54770198	Spg20	no
chr6:99269683-99270726	Foxp1	no
chr9:57958597-57962668	Sin3a	no
chr1:153789596-153792979	1700025G04Rik	no
chr5:148963670-148965869	N/A	N/A
chr5:115040005-115041560	Msi1	no
chr2:33471405-33472720	N/A	N/A
chr13:54420994-54422064	N/A	N/A
chr17:89336191-89338306	Gm10184	no
chr1:77491578-77494428	Epha4	no
chr10:44716987-44718436	Prep	no
chr2:102526057-102526990	Ldlrad3	no
chr15:96226116-96227665	Arid2	no
chr6:33688521-33689788	Gm6644	no
chr12:27315746-27317699	Sox11	yes
chr1:161544433-161546095	Rfwd2	no
chr11:77700551-77701864	Pipox	no
chr6:119535749-119536589	Fbxl14	no
chr17:23926894-23928187	N/A	N/A
chr11:88256797-88257958	Coil	no
chr11:31986508-31988278	Bod1	no
chr12:54688655-54689470	1110002B05Rik	no
chr11:82336540-82337686	Zfp830	no
chr13:57990950-57991742	Neurog1	no
chr6:94722157-94724758	N/A	N/A
chr2:6514497-6517921	N/A	N/A
chr5:143566137-143566649	Tnrc18	no
chr11:88214900-88221127	Coil	no
chr6:112962068-112963416	Srgap3	no
chr4:142867915-142871002	Pdpn	no
chr15:82098296-82098805	Cenpm	no
chr5:115021339-115022147	Msi1	no
chr7:145796744-145798893	Glrx3	no
chr5:114166672-114167095	Sart3	no
chr5:38287887-38289543	Msx1	no
chr6:116104992-116106103	Tmcc1	no
chr2:3335979-3338242	Suv39h2	no
chr5:125614466-125615961	Zfp664	no
chr11:44470881-44471726	Clint1	no
chr11:88273454-88278441	Coil	no
chr2:93014041-93019201	2810002D19Rik	no
chr10:91147729-91149481	Nedd1	no
chr8:8574673-8575604	Efnb2	no
chr4:103371731-103373858	N/A	N/A
chr18:79262313-79269881	Adnp2	no
chr4:149830433-149831392	Errfi1	no
chr11:69613114-69614490	Trp53	yes
chr3:88028816-88032993	Mrpl24	no
chr10:122323059-122325398	Mon2	no
chr9:59010677-59012141	Adpgk	no
chr2:46521230-46523007	Zeb2	no
chr1:134230009-134230882	Nuak2	no
chr7:123327929-123328461	Plekha7	no
chr2:151792380-151796978	N/A	N/A
chr1:157075973-157078249	Ier5	no
chr10:39290282-39293187	Tube1	no
chr12:81114090-81115887	Zfp36l1	no
chr1:35754218-35755187	Uggt1	no
chr15:31471331-31472526	N/A	N/A
chr18:76628198-76630186	Skor2	yes
chr6:88887125-88893861	Mcm2	no
chr9:107636705-107639830	Mon1a	no
chr9:41612887-41614484	2610203C20Rik	no
chr4:128391900-128395400	Zfp362	no
chr12:109558226-109559955	Eml1	no
chr4:149745455-149749074	Errfi1	no
chr1:156678190-156679655	N/A	N/A
chr6:83384845-83385913	Dguok	no
chr19:7350352-7351117	AI846148	no
chr19:7143052-7144973	AI846148	no
chr1:170278151-170279128	Pbx1	no
chr17:73826577-73827928	Lbh	no
chr1:78154136-78156780	Pax3	no
chr12:8928153-8930247	Sdc1	no
chr13:60271272-60273477	Gas1	yes
chr2:38637684-38638093	Lhx2	no
chr8:93393008-93396061	Chd9	no
chr11:86759790-86761533	Prr11	no
chr13:47950718-47951838	Dek	no
chr6:51157209-51159632	Hnrnpa2b1	no
chr3:86953919-86955874	N/A	N/A
chr13:100261894-100264030	Mtap1b	no
chr17:88996347-88997193	Ston1	no
chr11:20531363-20533542	Sertad2	no
chr11:81315155-81315771	Tmem98	no
chr3:108789424-108790564	Slc25a24	no
chr3:108234822-108238752	Gpsm2	no
chr11:19454374-19455719	N/A	N/A
chr11:6760168-6760864	Tbrg4	no
chr13:34329944-34332189	Rpp40	no
chr4:43642525-43645169	Pax5	yes
chr4:105147457-105148112	Usp24	no
chr4:126903500-126906359	Zmym6	no
chr12:75209826-75211245	N/A	N/A
chr8:122985768-122986681	Gm6834	no
chr11:88148147-88148857	Coil	no
chr8:36667882-36671666	N/A	N/A
chr9:45459440-45460208	N/A	N/A
chr7:123008867-123010554	Plekha7	no
chr12:28248828-28253026	Sox11	yes
chr19:58402122-58403107	Gfra1	no
chr14:13020827-13023838	Ptprg	no
chr2:169122888-169124192	N/A	N/A
chr4:55017458-55019062	Tal2	no
chr2:26387876-26391935	Notch1	yes
chr5:123751900-123753038	Setd8	no
chr3:78948624-78950491	Ppid	no
chr1:78163053-78170877	Pax3	no
chr4:108035198-108036635	Zcchc11	no
chr13:45511213-45515356	N/A	N/A
chr13:56309724-56310746	Neurog1	no
chr10:92253186-92255435	Nedd1	no
chr13:54397458-54399584	N/A	N/A
chr11:76460395-76461127	Rpl23a	no
chr1:195215086-195216977	Plxna2	yes
chr18:79244825-79249904	Adnp2	no
chr17:66828167-66830643	Twsg1	no
chr4:32437657-32439175	Map3k7	no
chr18:79303056-79307822	Pard6g	no
chr10:93350954-93352914	Nr2c1	no
chr11:118914113-118915378	N/A	N/A
chr18:36014258-36016456	Eif4ebp3	no
chr2:17954977-17956222	2810030E01Rik	no
chr12:90088186-90089515	N/A	N/A
chr2:20981206-20982737	Arhgap21	no
chr2:173600478-173602862	Pck1	no
chr11:33672200-33673118	Npm1	no
chr1:128579382-128582050	Actr3	no
chr7:118836125-118837158	1700012D14Rik	no
chr2:93153211-93155197	Trp53i11	no
chr5:118830504-118831638	Fbxw8	no
chr1:185889521-185891120	N/A	N/A
chr3:38595910-38597914	Ankrd50	no
chr12:88127174-88128858	Ahsa1	no
chr19:7164651-7165645	AI846148	no
chr8:126972909-126974063	N/A	N/A
chr18:67656833-67658829	Seh1l	no
chr12:101551581-101553132	Ccdc88c	no
chr11:102824681-102825560	Gjc1	no
chr7:85764445-85766005	Mrpl46	no
chr4:108032269-108034092	Zcchc11	no
chr5:140073678-140075837	Heatr2	no
chr6:100920077-100921615	Pdzrn3	no
chr17:49115480-49116477	Nfya	no
chr7:139037646-139039018	Bub3	no
chr12:107717507-107718265	Vrk1	no
chr8:93853385-93856171	Irx3	no
chr7:148357969-148359130	Rplp2	no
chr12:82155143-82157654	Cox16	no
chr8:97515941-97521393	Ciapin1	no
chr12:40701420-40703011	N/A	N/A
chr18:67713740-67714341	Seh1l	no
chr9:119311301-119313309	Acvr2b	no
chr11:54567997-54568910	Cdc42se2	no
chr18:67768808-67772000	Seh1l	no
chr3:154312309-154313417	Fpgt	no
chr18:54611622-54614458	Csnk1g3	no
chr6:36852403-36853899	1810058I24Rik	no
chr19:47585094-47586011	Taf5	no
chr18:55060489-55062567	Csnk1g3	no
chr1:158984208-158986635	Ralgps2	no
chr8:49426711-49428000	Dctd	no
chr17:12397494-12399450	Plg	no
chr14:27863192-27864677	N/A	N/A
chr4:106693069-106694348	Tmem48	no
chr9:36757898-36759050	Pknox2	no
chr14:26240532-26242072	Ppif	no
chr9:123294278-123295670	Zfp167	no
chr11:89159178-89161142	N/A	N/A
chr9:41272222-41273144	2610203C20Rik	no
chr7:72189096-72189783	N/A	N/A
chr5:145317220-145318587	Bri3	no
chr1:184889434-184890341	Enah	no
chr7:91549734-91551021	Fam108c	no
chr8:110767695-110771162	Zfhx3	no
chr19:26843428-26845939	N/A	N/A
chr12:54161911-54164258	1110002B05Rik	no
chr13:29461974-29464195	Sox4	no
chr7:104578064-104578863	Ints4	no
chr2:72619219-72620675	Cdca7	no
chr18:65185935-65186722	Nedd4l	no
chr18:55851995-55853972	Csnk1g3	no
chr14:100682652-100685391	N/A	N/A
chr5:120751641-120752882	Lhx5	no
chr8:127000199-127001449	N/A	N/A
chr7:140686815-140687799	2700050L05Rik	no
chr10:42825613-42826698	Sec63	no
chr5:66718884-66720316	N/A	N/A
chr10:39203936-39205730	Tube1	no
chr10:39259718-39262766	Tube1	no
chr2:68203682-68206473	Stk39	no
chr11:44645230-44647590	Clint1	no
chr12:53932592-53933095	Nubpl	no
chr13:48225370-48227853	Dek	no
chr14:47608382-47609766	Cgrrf1	no
chr18:56207076-56209187	Csnk1g3	no
chr9:49402886-49404319	Pts	no
chr13:29701193-29704482	Sox4	no
chr6:88950001-88950792	Mcm2	no
chr4:44245406-44247811	Pax5	yes
chr19:57632770-57633867	Nhlrc2	no
chr12:81162083-81165518	Zfp36l1	no
chr13:54423585-54425245	N/A	N/A
chr10:18054254-18054835	N/A	N/A
chr9:79677738-79679464	N/A	N/A
chr4:130635854-130636646	Ptp4a2	no
chr1:192551439-192553679	Cenpf	no
chr11:88087172-88090828	Coil	no
chr11:99114343-99114861	Igfbp4	no
chr11:86710202-86710966	Dhx40	no
chr5:28448728-28452292	Paxip1	no
chr2:92717703-92718350	N/A	N/A
chr11:108796557-108797168	Axin2	no
chr6:77695791-77696428	Ctnna2	yes
chr10:42579207-42580732	Sec63	no
chr13:59247341-59247889	Golm1	no
chr10:119853641-119855296	Hmga2	no
chr14:35266483-35268160	Sncg	no
chr5:75408649-75409147	Fip1l1	no
chr15:98458828-98459831	Tuba1b	no
chr1:134217740-134220594	Rbbp5	no
chr11:62780167-62781295	Zfp286	no
chr2:84474567-84476882	Ube2l6	no
chr11:16490724-16492471	2810442I21Rik	no
chr11:77928040-77929802	Pipox	no
chr4:104841248-104844233	Usp24	no
chr3:127364493-127365693	Neurog2	yes
chr7:106451748-106455328	Serpinh1	no
chr1:41946937-41949502	AI597479	no
chr11:88569695-88571039	Coil	no
chr7:35354931-35356402	Uba2	no
chr2:38552774-38553501	Lhx2	no
chr1:138678552-138679476	N/A	N/A
chr8:8482297-8485913	Efnb2	no
chr11:106520949-106523002	Kpna2	no
chr5:36266786-36270425	2310079F23Rik	no
chr1:179078589-179081665	Akt3	yes
chr11:44706234-44707205	Clint1	no
chr15:68710973-68712000	Khdrbs3	no
chr9:95714112-95714969	Atr	yes
chr15:77894717-77896334	Ift27	no
chr18:10340627-10345472	Mib1	yes
chr5:100165850-100167732	Rasgef1b	no
chr3:138162344-138163940	N/A	N/A
chr11:35318000-35319275	Rars	no
chr6:49729479-49730465	N/A	N/A
chr2:157626127-157628026	Rprd1b	no
chr9:41543616-41544420	2610203C20Rik	no
chr6:136490028-136492244	Wbp11	no
chr2:20967672-20971891	Arhgap21	no
chr2:50665447-50667138	Rnd3	no
chr2:26152066-26155750	Pmpca	no
chr3:103223191-103226030	Cttnbp2nl	no
chr2:154401958-154404290	Plagl2	no
chr2:29348306-29350173	Setx	no
chr10:39306070-39309238	Tube1	no
chr3:101857060-101861517	Nhlh2	no
chr4:13677453-13679904	Gm11847	no
chr2:93019849-93021685	Trp53i11	no
chr2:29675384-29676604	N/A	N/A
chr4:130149322-130156929	Ptp4a2	no
chr8:122434501-122435351	Gm6834	no
chr18:78691647-78693248	Adnp2	no
chr17:66766248-66767592	Twsg1	no
chr7:135815321-135816896	Tial1	no
chr8:122700224-122702016	Gm6834	no
chr15:73300777-73301340	Ptk2	yes
chr10:66528235-66529582	Reep3	no
chr3:83797019-83798746	D930015E06Rik	no
chr11:4661760-4662596	Tbc1d10a	no
chr3:103445045-103445525	Phtf1	no
chr1:168209728-168211554	Pou2f1	no
chr11:18781226-18784538	N/A	N/A
chr3:84828172-84829998	Rps3a	no
chr10:6482057-6483585	N/A	N/A
chr10:39181263-39182853	Tube1	no
chr19:22731114-22732134	N/A	N/A
chr7:35583730-35585740	Ccdc123	no
chr11:25755720-25757368	Bcl11a	no
chr11:88260596-88262253	Coil	no
chr6:124853105-124855299	Chd4	no
chr1:154639476-154641352	Arpc5	no
chr1:42547790-42549055	Pou3f3	no
chr18:82733445-82734553	N/A	N/A
chr9:65062416-65063611	Rbpms2	no
chr5:132269813-132271195	Auts2	no
chr14:25370134-25370824	N/A	N/A
chr2:101987475-101988443	Ldlrad3	no
chr13:29506320-29509300	Sox4	no
chr14:48790229-48791947	Dlgap5	no
chr18:68276441-68278086	N/A	N/A
chr2:157298842-157302554	Rbl1	no
chr6:50839613-50843626	N/A	N/A
chr5:64771938-64773313	Pgm1	no
chr1:195814796-195816868	Plxna2	yes
chr1:135966724-135968940	Btg2	no
chr13:34361378-34362344	Psmg4	no
chr5:36497344-36498665	2310079F23Rik	no
chr12:109217852-109219577	Bcl11b	no
chr14:25645141-25648955	N/A	N/A
chr8:111230065-111232305	Zfhx3	no
chr1:42299448-42301444	2610017I09Rik	no
chr9:71741804-71745846	Mns1	no
chr13:72088501-72091531	Irx2	no
chr12:27569765-27572932	Sox11	yes
chr1:99944290-99946267	Ppip5k2	no
chr1:77497924-77500029	Epha4	no
chr11:31738526-31740263	Bod1	no
chr11:24270413-24271286	Bcl11a	no
chr11:96439373-96440625	Kpnb1	no
chr14:29770851-29772621	N/A	N/A
chr1:153916698-153917918	Rnf2	no
chr6:134150074-134150880	N/A	N/A
chr9:45928073-45928812	Bud13	no
chr5:132121701-132122756	N/A	N/A
chr4:153923525-153924982	N/A	N/A
chr5:77093646-77096223	Aasdh	no
chr12:33756958-33758135	Twistnb	no
chr13:34369794-34371342	Prpf4b	no
chr1:91472977-91473902	Agap1	no
chr3:154212940-154214362	Slc44a5	no
chr19:21861356-21865223	Tmem2	no
chr10:17546498-17548347	Txlnb	no
chr4:126909144-126910680	Zmym6	no
chr12:109501319-109505507	N/A	N/A
chr11:59988822-59991585	Cops3	no
chr15:38127926-38130183	Ubr5	no
chr18:54878519-54880238	Csnk1g3	no
chr10:39378700-39380485	Tube1	no
chr1:189686227-189687260	Gpatch2	no
chr2:28242718-28243991	Rxra	no
chr9:65523748-65525252	Rbpms2	no
chr1:81589640-81591957	Rhbdd1	no
chr12:113570808-113573523	Cdca4	no
chr1:6750276-6751856	Rb1cc1	no
chr14:67111585-67114510	Adra1a	no
chr2:28151283-28152089	Rxra	no
chr15:85291167-85295407	Phf21b	no
chr5:24101728-24103257	Abcf2	no
chr5:112372493-112374456	Mn1	no
chr10:17050474-17053743	3110003A17Rik	no
chr9:26956108-26958193	N/A	N/A
chr2:4381157-4383979	Suv39h2	no
chr11:77719630-77720939	Ccdc55	no
chr5:103589135-103591831	Mapk10	no
chr7:29854751-29857215	Eif3k	no
chr1:170238234-170239879	Pbx1	no
chr18:42852877-42853816	Dcp2	no
chr15:101050480-101053302	N/A	N/A
chr2:170144379-170145547	N/A	N/A
chr11:88394853-88403801	Coil	no
chr8:35388051-35390481	Dusp4	no
chr5:113581730-113583099	N/A	N/A
chr12:113567200-113569718	Siva1	no
chr9:122410076-122411451	Limd1	no
chr10:84321467-84322536	Rfx4	no
chr11:22460559-22461294	N/A	N/A
chr1:55722420-55723737	N/A	N/A
chr1:160150778-160151830	N/A	N/A
chr13:112890727-112891486	Gpbp1	no
chr11:77709611-77712014	Pipox	no
chr4:124162391-124164278	Pou3f1	no
chr14:30255401-30256417	N/A	N/A
chr11:120176773-120178218	Bahcc1	no
chr2:44950598-44953758	Zeb2	no
chr13:28500622-28501168	Sox4	no
chr8:127741385-127743162	Sipa1l2	no
chr9:63807084-63808645	Rpl4	no
chr13:48266819-48267879	Dek	no
chr4:33009512-33011326	Casp8ap2	no
chr4:54624596-54626875	Tal2	no
chr17:32013883-32014936	Wdr4	no
chr13:98026263-98026899	Enc1	no
chr5:140424818-140425798	Mad1l1	no
chr1:138028148-138030071	N/A	N/A
chr13:98565846-98570076	Enc1	no
chr1:40003046-40005882	Map4k4	no
chr15:85232592-85234422	Phf21b	no
chr14:77776734-77778756	Gm10132	no
chr5:5055930-5056830	Cdk14	no
chr2:17947421-17954053	2810030E01Rik	no
chr10:75335251-75336682	Smarcb1	yes
chr11:88334331-88335187	Coil	no
chr17:63211303-63212424	N/A	N/A
chr3:68408547-68410729	N/A	N/A
chr9:72728002-72729499	N/A	N/A
chr18:76998097-76999899	Ier3ip1	no
chr14:64970750-64971771	N/A	N/A
chr4:57103788-57105278	Akap2	no
chr9:36900586-36901320	Pknox2	no
chr13:59111837-59113494	Golm1	no
chr14:78201229-78203067	Gm10132	no
chr16:21273179-21275213	Polr2h	no
chr15:75970303-75971692	Puf60	no
chr3:51592362-51594219	Naa15	no
chr17:44089152-44090073	Supt3h	no
chr12:99799526-99803792	Kcnk10	no
chr4:119924892-119926701	Dem1	no
chr8:48347525-48349522	Rwdd4a	no
chr16:17949205-17950467	Slc25a1	no
chr12:32579811-32582543	Gpr22	no
chr13:43624875-43627942	Dtnbp1	no
chr12:30382844-30384843	Rps7	no
chr18:16871423-16872884	Cdh2	no
chr2:170043837-170047057	N/A	N/A
chr19:46517152-46518805	Pprc1	no
chr13:44934352-44938966	Dtnbp1	no
chr8:81080452-81081778	Rbmxl1	no
chr7:144441347-144443200	Ebf3	no
chr15:52795326-52796525	Ext1	yes
chr12:29942291-29943369	Rps7	no
chr6:54458003-54459292	N/A	N/A
chr5:129723605-129724923	Ran	no
chr6:52068600-52070199	Hnrnpa2b1	no
chr4:54383672-54386811	Tal2	no
chr16:37583573-37585755	4930455C21Rik	no
chr13:28887167-28887567	Sox4	no
chr17:56949418-56950347	Mllt1	no
chr8:87234739-87238305	Farsa	no
chr11:35341151-35342002	Rars	no
chr7:73374914-73376153	Lins	no
chr12:27587781-27589434	Sox11	yes
chr15:83529204-83530644	Scube1	no
chr19:41747090-41748314	Ccnj	no
chr2:33643269-33646312	Pbx3	no
chr13:56359976-56361776	Neurog1	no
chr13:54975577-54976554	Ddx41	no
chr13:72761251-72762782	Irx2	no
chr1:134271034-134272504	Rbbp5	no
chr4:148628478-148631187	Gm13072	no
chr1:174078278-174079794	Vangl2	no
chr13:73443053-73444849	Irx1	no
chr9:63727047-63729591	N/A	N/A
chr7:129620809-129622920	Plk1	no
chr18:57420766-57423209	Phax	no
chr6:55337868-55339324	N/A	N/A
chr9:102590333-102595366	Amotl2	no
chr15:72718596-72720152	N/A	N/A
chr3:37571241-37573186	Spry1	no
chr19:36970874-36972048	Tnks2	no
chr15:99477911-99480142	Prph	no
chr4:97614424-97616017	N/A	N/A
chr1:173944682-173948259	Vangl2	no
chr12:53934407-53937928	Nubpl	no
chr9:107381804-107383867	Hyal2	no
chr3:90249890-90250939	Ints3	no
chr8:90415421-90417757	Zfp423	yes
chr6:146058343-146061602	Bcat1	no
chr18:16828141-16829739	Cdh2	no
chr15:82886062-82887632	Cyb5r3	no
chr4:133284667-133287768	Gpn2	no
chr19:57152505-57153739	Atrnl1	no
chr19:48733594-48735029	N/A	N/A
chr13:98204976-98207069	Enc1	no
chr3:38806038-38808092	Ankrd50	no
chr11:108966382-108969760	Axin2	no
chr10:38273503-38275386	N/A	N/A
chr12:73336104-73337605	1810048J11Rik	no
chr4:132753006-132754992	Phactr4	no
chr13:100213322-100218655	Mtap1b	no
chr9:61315951-61317128	Tle3	no
chr2:145657800-145658975	Crnkl1	no
chr18:80303217-80304604	Pard6g	no
chr12:112074985-112075876	Ppp2r5c	no
chr17:48013885-48015832	N/A	N/A
chr5:125872389-125875155	Zfp664	no
chr8:125327320-125328807	Banp	no
chr19:28379989-28381489	D19Bwg1357e	no
chr2:17960630-17965398	2810030E01Rik	no
chr6:114240438-114241603	Sec13	no
chr7:35475468-35478338	Kctd15	no
chr3:108212305-108215712	Celsr2	no
chr17:66792875-66796740	Twsg1	no
chr3:86975412-86979270	N/A	N/A
chr14:26425811-26428715	Ppif	no
chr4:149624626-149625969	Errfi1	no
chr19:55217942-55220124	Bbip1	no
chr18:72882449-72884072	Dcc	yes
chr11:112687256-112688724	Sox9	no
chr12:118865790-118867708	N/A	N/A
chr5:149399993-149400999	Hmgb1	no
chr5:35291413-35293555	Gm5553	no
chr1:34239150-34241755	Imp4	no
chr11:84391512-84393191	Ddx52	no
chr2:150482145-150483680	Acss1	no
chr12:55292063-55294006	1110002B05Rik	no
chr9:16241111-16246838	Chordc1	no
chr4:129710615-129711437	Tmem39b	no
chr18:13020510-13022308	N/A	N/A
chr8:111875437-111878067	Zfhx3	no
chr1:78135036-78141822	Pax3	no
chr16:44526594-44528294	Boc	no
chr2:157173328-157174034	Rpn2	no
chr8:10972432-10973099	N/A	N/A
chr4:119921157-119922260	Dem1	no
chr10:122320141-122322357	Mon2	no
chr12:45502025-45506328	N/A	N/A
chr5:112122144-112122996	Mn1	no
chr2:145993884-145995450	Crnkl1	no
chr5:99366783-99369844	Gm3470	no
chr15:95261206-95263513	N/A	N/A
chr11:44447916-44449243	Clint1	no
chr11:108929340-108932924	Axin2	no
chr1:139823477-139826277	N/A	N/A
chr7:77493622-77497244	N/A	N/A
chr5:148919568-148920210	N/A	N/A
chr16:77399404-77401993	2810055G20Rik	no
chr8:12808976-12810151	Tubgcp3	no
chr11:23999169-24000793	Bcl11a	no
chr7:126119583-126121579	2310008H09Rik	no
chr7:138004062-138005247	Nsmce4a	no
chr9:16289565-16291686	Chordc1	no
chr12:55387755-55389637	1110002B05Rik	no
chr10:42831927-42832870	Sec63	no
chr7:38473449-38476067	Ccne1	no
chr12:81025198-81028226	Zfp36l1	no
chr5:132766187-132767967	N/A	N/A
chr13:60027491-60030191	Gas1	yes
chr11:20549517-20551081	Sertad2	no
chr5:112322501-112323360	Mn1	no
chr6:51716444-51718642	Hnrnpa2b1	no
chr19:5529669-5530739	Scyl1	yes
chr11:109337087-109338260	Axin2	no
chr16:21339301-21340657	Polr2h	no
chr17:88276685-88277295	N/A	N/A
chr11:94020411-94023296	Spag9	no
chr2:50768738-50770699	Rnd3	no
chr5:112271734-112274391	Mn1	no
chr4:54664405-54666799	Tal2	no
chr5:113389207-113390578	N/A	N/A
chr13:100378785-100380383	Mtap1b	no
chr6:112921457-112924739	Srgap3	no
chr4:138049112-138052635	N/A	N/A
chr6:145064748-145065501	Bcat1	no
chr8:113585592-113586299	Sf3b3	no
chr12:27765803-27770663	Sox11	yes
chr2:44096426-44098787	Zeb2	no
chr1:156898524-156900621	Ier5	no
chr3:55226122-55228800	Spg20	no
chr7:38347566-38351326	Ccne1	no
chr4:43261019-43262024	B230312A22Rik	no
chr8:90183710-90187412	Zfp423	yes
chr5:104201326-104202734	Ptpn13	no
chr5:112699467-112700644	N/A	N/A
chr4:138208592-138209071	N/A	N/A
chr11:32037649-32038913	Bod1	no
chr15:82813167-82814472	Cyb5r3	no
chr6:92771248-92772334	N/A	N/A
chr15:101632484-101634847	Eif4b	no
chr9:56353931-56355342	Tspan3	no
chr14:23564528-23565862	Zfp503	no
chr4:138003107-138004423	N/A	N/A
chr11:71569282-71573703	N/A	N/A
chr4:6900791-6901497	Tox	no
chr8:68489523-68491422	1810029B16Rik	no
chr1:135991991-135996367	Btg2	no
chr16:35596494-35598324	Sema5b	no
chr13:34284908-34286180	Psmg4	no
chr5:34593825-34595530	Fam193a	no
chr14:80360293-80361994	Pcdh8	no
chr2:152655760-152657456	Mcts2	no
chr5:45496023-45497197	Ldb2	no
chr9:59000543-59001601	Adpgk	no
chr14:25834473-25835932	Ppif	no
chr5:106194955-106196600	Gm10196	no
chr11:88237127-88238638	Coil	no
chr2:165421822-165423651	Eya2	no
chr4:150513160-150515744	N/A	N/A
chr1:170216307-170222385	Pbx1	no
chr6:93768861-93772966	N/A	N/A
chr17:29492061-29494494	Ppil1	no
chr1:90735649-90737606	N/A	N/A
chr5:103446593-103448432	Mapk10	no
chr2:129625988-129628058	Bub1	no
chr16:18379390-18382649	Arvcf	no
chr5:23081957-23084895	Dnajc2	no
chr1:153923254-153925075	1700025G04Rik	no
chr11:24204994-24206099	Bcl11a	no
chr4:149980157-149981252	Errfi1	no
chr16:21395372-21396267	Polr2h	no
chr3:137447071-137448794	H2afz	no
chr18:75553578-75556014	Smad7	no
chr11:31909971-31910962	Asb3	no
chr16:31545907-31547361	Ncbp2	no
chr5:150020647-150021643	Hmgb1	no
chr18:68953697-68954865	N/A	N/A
chr13:29288011-29289263	Sox4	no
chr2:170018375-170019512	N/A	N/A
chr8:71644793-71647214	N/A	N/A
chr6:106962401-106963785	Lrrn1	no
chr3:83567985-83568770	D930015E06Rik	no
chr3:88574764-88576370	Mrpl24	no
chr5:125724129-125726920	Zfp664	no
chr1:100086541-100088852	Ppip5k2	no
chr9:63029177-63030549	Skor1	no
chr13:51662357-51665852	Secisbp2	no
chr9:46290568-46291532	Rbm7	no
chr3:153854660-153858064	Slc44a5	no
chr7:85335149-85336399	Mrpl46	no
chr5:150297910-150300351	Hmgb1	no
chr7:117874788-117875740	Wee1	no
chr13:28506623-28511128	Sox4	no
chr17:50566396-50567723	N/A	N/A
chr8:107956072-107957897	Tppp3	no
chr9:96869071-96871463	N/A	N/A
chr11:36490082-36492362	N/A	N/A
chr3:52446895-52449329	N/A	N/A
chr2:170169487-170172012	N/A	N/A
chr13:70072173-70073569	Med10	no
chr9:115513150-115515325	Cmtm7	no
chr8:18740811-18741731	N/A	N/A
chr1:174191232-174192110	Vangl2	no
chr15:74006206-74007757	N/A	N/A
chr7:86026812-86028917	Mrpl46	no
chr1:39612487-39613390	N/A	N/A
chr8:119780140-119785344	Gcsh	no
chr8:90267536-90272319	Zfp423	yes
chr18:60895214-60895795	Rbm22	no
chr13:73244377-73245579	Irx2	no
chr6:112852054-112854982	Srgap3	no
chr4:137591884-137593489	Alpl	no
chr4:32389249-32393781	Map3k7	no
chr8:81601858-81603669	Rbmxl1	no
chr9:96872057-96872947	N/A	N/A
chr11:69842086-69844216	Pfn1	no
chr9:69560627-69562372	Anxa2	no
chr4:124154665-124155660	Utp11l	no
chr11:84162038-84163835	Lhx1	no
chr2:75059134-75059608	Gm13654	no
chr2:169230111-169231430	N/A	N/A
chr4:62285816-62286848	Alad	no
chr9:46884768-46885682	Rbm7	no
chr11:96757744-96758797	Cbx1	no
chr6:28881847-28883074	Rbm28	no
chr8:97470557-97471226	Fam192a	no
chr2:136680173-136681059	2210009G21Rik	no
chr18:54337935-54340168	Csnk1g3	no
chr8:94519178-94521874	Irx3	no
chr3:51552334-51554521	Ndufc1	no
chr17:15480006-15480681	Dll1	no
chr2:65881448-65882958	Ttc21b	no
chr5:122431235-122432634	Fam109a	no
chr17:87729743-87731955	N/A	N/A
chr9:41172665-41174786	2610203C20Rik	no
chr11:117267831-117271928	1110005A03Rik	no
chr9:96889977-96890688	N/A	N/A
chr11:35678203-35679695	Rars	no
chr2:152646153-152646789	Tpx2	no
chr19:14963972-14965894	Tle4	no
chr4:118261849-118262618	N/A	N/A
chr5:99679862-99681825	Rasgef1b	no
chr11:88347555-88350051	Coil	no
chr2:154251426-154253968	Plagl2	no
chr2:166554067-166556607	Ncoa3	no
chr16:7404686-7405390	N/A	N/A
chr17:66753943-66755076	Gm4705	no
chr13:70125700-70127687	Med10	no
chr7:58877240-58880734	N/A	N/A
chr12:27823040-27826607	Sox11	yes
chr10:92628199-92629530	Snrpf	no
chr5:34162305-34164734	Gm5553	no
chr2:34211357-34212116	Hspa5	yes
chr12:80908300-80909497	Zfp36l1	no
chr8:8487022-8490617	Efnb2	no
chr9:96950676-96952256	N/A	N/A
chr2:122730888-122731342	Myef2	no
chr8:81158567-81159428	Rbmxl1	no
chr9:112004630-112006014	N/A	N/A
chr6:142705234-142706440	Slco1b2	no
chr5:147523651-147524761	Gtf3a	no
chr15:87649236-87649604	Tbc1d22a	no
chr3:86656645-86658043	N/A	N/A
chr7:103532024-103533770	Odz4	no
chr13:71286936-71288508	Irx1	no
chr8:37204442-37206101	D8Ertd82e	no
chr1:153929309-153930350	1700025G04Rik	no
chr13:71295962-71299483	Irx1	no
chr6:88337690-88339281	Ruvbl1	no
chr15:75462731-75466535	Zfp41	no
chr6:116346713-116348791	Tmcc1	no
chr7:78555546-78557163	N/A	N/A
chr9:96737188-96739918	Acpl2	no
chr10:44866770-44867723	Prep	no
chr6:39295085-39300228	Hipk2	no
chr5:142915441-142917371	Gna12	no
chr11:60198057-60199140	Cops3	no
chr8:93019218-93022058	Tox3	no
chr12:105451718-105453101	N/A	N/A
chr11:63544698-63545838	Hs3st3b1	no
chr13:47368455-47369881	Dek	no
chr2:157369596-157371194	Rbl1	no
chr8:122897862-122901021	Gm6834	no
chr11:88563325-88564929	Coil	no
chr16:77405598-77407285	2810055G20Rik	no
chr5:112468503-112470958	Mn1	no
chr11:62425491-62429040	N/A	N/A
chr9:46510476-46512497	Rbm7	no
chr18:54982599-54983881	Csnk1g3	no
chr2:109782450-109785196	Ccdc34	no
chr7:56326209-56326902	N/A	N/A
chr3:88634734-88636742	Arhgef2	yes
chr1:134178354-134180333	Nuak2	no
chr18:5976838-5980701	Kif5b	no
chr6:117856201-117858361	Hnrnpf	no
chr11:88227342-88228645	Coil	no
chr1:195275508-195276653	Plxna2	yes
chr3:68387020-68388675	N/A	N/A
chr7:35489134-35490019	Kctd15	no
chr2:172998144-173000292	Slmo2	no
chr13:72425173-72427116	Irx1	no
chr3:101727665-101728751	Nhlh2	no
chr13:28873459-28875102	Sox4	no
chr17:75418690-75419986	Dpy30	no
chr8:90477254-90478013	Zfp423	yes
chr11:20867771-20868929	Vps54	yes
chr10:120144154-120145176	Hmga2	no
chr8:92847126-92848076	Tox3	no
chr19:46111866-46114742	N/A	N/A
chr11:117352957-117353724	1110005A03Rik	no
chr6:38112757-38113652	Zc3hav1l	no
chr7:143457995-143460453	Ebf3	no
chr17:63419126-63420209	N/A	N/A
chr5:103764615-103766900	Ptpn13	no
chr13:104038287-104038955	Mast4	no
chr6:36738091-36740413	1810058I24Rik	no
chr2:170597124-170599000	Aurka	no
chr4:117760556-117762334	Med8	no
chr5:97444305-97446155	N/A	N/A
chr1:120806969-120808278	Mki67ip	no
chr12:107412257-107414254	Bcl11b	no
chr8:93888706-93890339	4933436C20Rik	no
chr6:52807603-52808907	Hibadh	no
chr11:87931517-87934003	Srsf1	no
chr7:80761927-80763873	St8sia2	no
chr2:152549117-152550570	Mcts2	no
chr10:96343928-96345279	N/A	N/A
chr1:154011689-154013599	Rnf2	no
chr2:33741672-33743397	Hspa5	yes
chr14:32482336-32483657	Ankrd28	no
chr10:66382272-66385021	Reep3	no
chr13:72438517-72441945	Irx1	no
chr11:117357350-117360164	1110005A03Rik	no
chr5:103449886-103451810	Mapk10	no
chr18:38303152-38305028	Gm19774	no
chr3:133965583-133967200	Cxxc4	no
chr8:94038449-94039610	Irx3	no
chr4:62242902-62245734	Cdc26	no
chr3:55559747-55561023	Spg20	no
chr9:50500339-50501429	N/A	N/A
chr2:75308000-75309145	Gm13654	no
chr14:17032691-17034566	Top2b	no
chr10:17350933-17352593	Reps1	no
chr2:170482931-170483745	Aurka	no
chr9:46196820-46198298	Rbm7	no
chr11:69833924-69835831	N/A	N/A
chr4:123725779-123726310	Pou3f1	no
chr12:30386235-30388018	Rps7	no
chr7:16719541-16721454	Meis3	no
chr12:104401868-104403757	Btbd7	no
chr17:28606395-28608147	Fkbp5	no
chr17:30945769-30947588	Rnf8	no
chr18:54334034-54336824	Csnk1g3	no
chr3:121092627-121094007	Cnn3	no
chr15:66069835-66073136	N/A	N/A
chr6:28791609-28793300	Rbm28	no
chr9:113700738-113702646	N/A	N/A
chr17:56325129-56325703	Dpp9	no
chr1:37178304-37180611	Tsga10	no
chr5:36257586-36264634	2310079F23Rik	no
chr3:121186450-121187150	Cnn3	no
chr14:123119048-123121179	Tm9sf2	no
chr4:57793710-57796476	Akap2	no
chr7:106460026-106462473	Serpinh1	no
chr18:16196219-16197425	Gm10036	no
chr2:180622618-180630339	Ppdpf	no
chr12:118389042-118399439	Zfp386	no
chr6:36724020-36728536	1810058I24Rik	no
chr11:71311084-71312631	Wscd1	no
chr11:88064940-88068065	Coil	no
chr11:80390424-80392347	Tmem98	no
chr8:85572976-85573958	Zfp330	no
chr8:49485957-49486492	Dctd	no
chr9:63380806-63383911	Skor1	no
chr5:111796394-111798532	Ulk1	no
chr16:89529987-89531687	N/A	N/A
chr8:127951433-127953963	Sipa1l2	no
chr3:84535357-84537213	Rps3a	no
chr5:31020216-31021704	Tyms	no
chr8:14548620-14550639	Arhgef10	no
chr10:12833964-12835580	Plagl1	no
chr2:50592967-50596156	Rnd3	no
chr4:136420853-136421681	Zbtb40	no
chr12:30219190-30220337	Rps7	no
chr2:101845306-101847068	Ldlrad3	no
chr8:12481384-12482595	Ankrd10	no
chr8:8231604-8232370	Efnb2	no
chr7:86675142-86682927	Ap3s2	no
chr1:76486670-76488396	Epha4	no
chr13:28902265-28904419	Sox4	no
chr6:95152139-95153544	N/A	N/A
chr9:40424719-40426090	N/A	N/A
chr2:70040066-70041359	Mettl5	no
chr10:70414484-70415410	Cdk1	no
chr4:122676098-122676906	Mycl1	no
chr10:12827420-12829148	Plagl1	no
chr14:80537914-80539724	Pcdh8	no
chr13:114707174-114709182	N/A	N/A
chr5:45493213-45494159	Ldb2	no
chr8:8994021-8995135	Efnb2	no
chr12:103295570-103297309	Cpsf2	no
chr7:144444818-144446255	Ebf3	no
chr5:123785903-123786977	2810006K23Rik	no
chr7:4504119-4505156	Ube2s	no
chr2:92646628-92647881	N/A	N/A
chr5:117018849-117025052	Srrm4	no
chr12:5274166-5275690	1110057K04Rik	no
chr5:65201536-65204001	Pgm1	no
chr8:106900052-106900919	N/A	N/A
chr17:10096920-10099632	N/A	N/A
chr7:145344674-145345925	Glrx3	no
chr2:26346197-26347284	Notch1	yes
chr6:112758017-112762393	Srgap3	no
chr4:124329481-124331019	Pou3f1	no
chr7:86722274-86723082	Ap3s2	no
chr6:113031510-113033124	Tada3	no
chr15:59478531-59480718	E430025E21Rik	no
chr11:44795560-44796009	Clint1	no
chr4:129554422-129555121	Tmem39b	no
chr15:85327549-85329429	Phf21b	no
chr4:32564723-32570905	Map3k7	no
chr12:99811458-99813897	Kcnk10	no
chr9:57963299-57963767	Sin3a	no
chr12:77182232-77183125	Syne2	no
chr5:114320449-114325074	N/A	N/A
chr12:27744891-27751605	Sox11	yes
chr4:100336983-100338780	Cachd1	no
chr13:98729602-98730230	Enc1	no
chr12:100247532-100250027	Eml5	no
chr11:119627021-119629854	Eif4a3	no
chr7:98591036-98592189	Tmem126b	no
chr13:52012245-52017169	Gadd45g	no
chr2:101957105-101958607	Ldlrad3	no
chr10:86497601-86500577	Ascl1	yes
chr18:84888761-84892735	Cyb5	no
chr18:84540604-84544357	Zfp407	no
chr8:42137711-42140592	Frg1	no
chr10:59656483-59657596	N/A	N/A
chr13:34905933-34908011	Rpp40	no
chr4:114297836-114298571	Dmbx1	no
chr8:111939506-111942279	Zfhx3	no
chr5:5342216-5344129	Cdk14	no
chr17:71143243-71144522	Tgif1	no
chr6:51606270-51609279	Hnrnpa2b1	no
chr9:122501542-122502646	Kif15	no
chr8:90354803-90358738	Zfp423	yes
chr8:90456294-90457888	Zfp423	yes
chr4:106768550-106770307	Tmem48	no
chr12:113401526-113402911	Siva1	no
chr17:15344551-15345815	Dll1	no
chr16:8669090-8672665	N/A	N/A
chr4:107495836-107496756	N/A	N/A
chr18:65857102-65858588	Zfp532	no
chr11:108781710-108784703	Axin2	no
chr16:42305897-42306978	Naa50	no
chr9:96911442-96914421	N/A	N/A
chr18:72494002-72495015	Mex3c	no
chr3:119090308-119091238	Ptbp2	no
chr10:84169882-84171846	Rfx4	no
chr12:103968218-103969876	Ubr7	no
chr13:71173510-71174962	Mrpl36	no
chr14:49048864-49049831	6720456H20Rik	no
chr1:170285153-170289868	Pbx1	no
chr13:54520356-54520867	N/A	N/A
chr17:17546274-17547043	Lix1	no
chr5:112265390-112266475	Mn1	no
chr13:72200434-72201277	Irx1	no
chr5:75585363-75586091	N/A	N/A
chr14:67927469-67928489	Ppp2r2a	no
chr14:52632036-52635256	Zfp219	no
chr5:114371220-114372345	N/A	N/A
chr18:64928568-64931496	Nedd4l	no
chr13:23676706-23678834	Hist1h2ad	no
chr2:146150353-146151656	Crnkl1	no
chr5:100520027-100521428	Hnrpdl	no
chr3:107887952-107889542	Celsr2	no
chr18:13895832-13898757	N/A	N/A
chr11:62442436-62444954	N/A	N/A
chr8:90213350-90215472	Zfp423	yes
chr11:45734743-45735518	N/A	N/A
chr9:86080448-86080995	Ibtk	no
chr16:44549642-44555124	Boc	no
chr15:97436938-97438508	Col2a1	no
chr7:81384832-81386279	St8sia2	no
chr15:80628179-80631611	Adsl	no
chr4:139266607-139267120	N/A	N/A
chr12:30339667-30342146	Rps7	no
chr8:48113555-48114234	Cdkn2aip	no
chr17:63357180-63358392	N/A	N/A
chr4:44259567-44261080	Pax5	yes
chr2:73966604-73969704	Lnp	no
chr7:135830758-135835189	Tial1	no
chr11:97289190-97290070	Kpnb1	no
chr11:118653479-118656632	Cant1	no
chr1:75439386-75442875	1810031K17Rik	no
chr5:151945440-151946248	Rfc3	no
chr6:86421691-86423323	Pcbp1	no
chr13:48197650-48198684	Dek	no
chr6:138368522-138369897	Lmo3	no
chr18:79178004-79182178	Pard6g	no
chr19:26920112-26920759	N/A	N/A
chr19:56103606-56105078	N/A	N/A
chr13:108453513-108454707	Zswim6	no
chr12:41516453-41518122	Zfp277	no
chr13:55571615-55574593	Ddx41	no
chr4:106632188-106633164	Lrrc42	no
chr7:74590407-74591313	Ttc23	no
chr18:25820349-25822598	N/A	N/A
chr17:53705722-53707982	Sgol1	no
chr4:71827579-71829753	Tle1	no
chr4:25335125-25337214	N/A	N/A
chr14:25694462-25695534	N/A	N/A
chr7:140258567-140259685	2700050L05Rik	no
chr11:107274486-107275212	Psmd12	no
chr19:26821346-26824912	N/A	N/A
chr18:56933442-56934677	C330018D20Rik	no
chr14:123280958-123284050	Tm9sf2	no
chr1:42314278-42319749	Pou3f3	no
chr8:126664345-126665762	Nup133	no
chr11:88234475-88235783	Coil	no
chr7:66098259-66100633	Ube3a	yes
chr3:55545618-55546613	Spg20	no
chr9:61126278-61127375	Tle3	no
chr7:126030644-126031276	2310008H09Rik	no
chr14:26216194-26217779	Ppif	no
chr1:123073471-123076944	2610027F03Rik	no
chr12:54172148-54172629	1110002B05Rik	no
chr9:63054025-63055832	Pias1	no
chr15:99911314-99912773	Prph	no
chr8:111215597-111216216	Zfhx3	no
chr11:108041757-108043227	Apoh	no
chr8:92824519-92827755	Tox3	no
chr2:30613705-30615160	Ier5l	no
chr12:118157308-118159256	Zfp386	no
chr11:72389418-72390841	1200014J11Rik	no
chr5:129661290-129663580	Ran	no
chr11:35740483-35742104	Rars	no
chr19:28527166-28527936	D19Bwg1357e	no
chr18:25835741-25838878	N/A	N/A
chr12:27978597-27979218	Sox11	yes
chr18:36007400-36010876	Eif4ebp3	no
chr6:90665176-90666305	N/A	N/A
chr15:75906834-75908989	BC024139	no
chr16:92323733-92325561	N/A	N/A
chr10:94084043-94086939	Nr2c1	no
chr2:63800652-63802155	N/A	N/A
chr11:44839937-44841092	Clint1	no
chr13:71243305-71244763	Irx1	no
chr10:43027598-43028642	Sec63	no
chr13:59596561-59597739	Golm1	no
chr8:46083807-46084643	N/A	N/A
chr9:22864630-22868022	Bbs9	no
chr16:35585734-35586618	Hspbap1	no
chr4:137321066-137322096	Alpl	no
chr11:116671671-116676432	1110005A03Rik	no
chr12:87999868-88001156	1700019E19Rik	no
chr3:83782451-83786075	D930015E06Rik	no
chr5:132808481-132809810	N/A	N/A
chr6:93742156-93743450	N/A	N/A
chr18:34048369-34052802	Kif20a	no
chr6:51797128-51801360	Hnrnpa2b1	no
chr2:50938041-50938943	Rif1	no
chr13:108627373-108627917	Zswim6	no
chr15:98798274-98802782	Prph	no
chr14:76431805-76433713	Tpt1	no
chr2:50771557-50772895	Rnd3	no
chr15:57421130-57421768	N/A	N/A
chr2:157365983-157367770	Gm14279	no
chr2:4379470-4379859	Suv39h2	no
chr2:33960759-33964393	Hspa5	yes
chr2:6403622-6405567	N/A	N/A
