# Supplementary material for: Temporal analysis of enhancers during mouse cerebellar development reveals dynamic and novel regulatory functions
Source: eLife. 2022 Aug 9;11:e74207. doi: 10.7554/eLife.74207 (PMC9398453; doi:10.7554/eLife.74207)
Supplement: Supplementary file 7. — The rightmost column (‘Orthologous’) indicates whether an enhancer and it’s putative target genes are found on the same chromosome after conversion. [file elife-74207-supp7.xlsx]

## Sheet: Sheet1
Robust Cerebellar Enhancer (hg38)	Enhancer Chr	Enhancer Start	Enhancer End	Putative Target Gene	Gene Chr	Gene Txn Start	Gene Txn End	Orthologous
chr8:53133931-53135556	chr8	52221371	52222996	Rb1cc1	chr8	52622457	52714429	yes
chr8:67454127-67455238	chr8	66541892	66543003	Vcpip1	chr8	66628486	66667231	yes
chr8:67578447-67579400	chr8	66666212	66667165	Vcpip1	chr8	66628486	66667231	yes
chr8:68893789-68894212	chr8	67981554	67981977	Arfgef1	chr8	67174297	67343368	yes
chr8:75205459-75207128	chr8	74293224	74294893	Jph1	chr8	74234699	74321361	yes
chr6:51706529-51708561	chr6	51841731	51843763	Tfap2b	chr6	50817691	50847619	yes
chr6:52442000-52442478	chr6	52577202	52577680	Mcm3	chr6	52264014	52284742	yes
chr6:73128229-73128934	chr6	72418527	72419232	Kcnq5	chr6	72621842	73132168	yes
chr6:70962848-70964242	chr6	70253145	70254539	Ogfrl1	chr6	71288295	71308953	yes
chrM:7996-9234	chrM	7995	9233	Adgrb3	chr6	68635281	69389506	no
chr6:69349882-69351592	chr6	68639990	68641700	Lmbrd1	chr6	69674009	69796466	yes
chr6:56715970-56717171	chr6	56851172	56852373	Imp4	chr2	130342241	130347683	no
chr6:56478642-56481043	chr6	56613844	56616245	Imp4	chr2	130342241	130347683	no
chr2:129510351-129511221	chr2	128752777	128753647	Uggt1	chr2	128091183	128195656	yes
chr2:129508768-129509514	chr2	128751194	128751940	Uggt1	chr2	128091183	128195656	yes
chr2:129079117-129079931	chr2	128321543	128322357	Uggt1	chr2	128091183	128195656	yes
chr2:129063713-129066152	chr2	128306139	128308578	Uggt1	chr2	128091183	128195656	yes
chr2:129050470-129050971	chr2	128292896	128293397	Uggt1	chr2	128091183	128195656	yes
chr2:97561465-97562523	chr2	96895728	96896786	Tsga10	chr2	98997260	99141148	yes
chr2:98826655-98828304	chr2	98210192	98211841	Tsga10	chr2	98997260	99141148	yes
chr2:99134587-99135141	chr2	98518124	98518678	Actr1b	chr2	97655938	97664044	yes
chr2:100188606-100189308	chr2	99572144	99572846	Aff3	chr2	99545418	100105583	yes
chr2:100217837-100218654	chr2	99601375	99602192	Aff3	chr2	99545418	100105583	yes
chr2:100280415-100280937	chr2	99663953	99664475	Aff3	chr2	99545418	100105583	yes
chr2:100458981-100459815	chr2	99842519	99843353	Aff3	chr2	99545418	100105583	yes
chr2:100468205-100469523	chr2	99851743	99853061	Aff3	chr2	99545418	100105583	yes
chr2:100497017-100498182	chr2	99880555	99881720	Aff3	chr2	99545418	100105583	yes
chr2:100516146-100517720	chr2	99899684	99901258	Chst10	chr2	100391859	100416526	yes
chr2:100572596-100573392	chr2	99956134	99956930	Aff3	chr2	99545418	100105583	yes
chr2:100657347-100658893	chr2	100040885	100042431	Aff3	chr2	99545418	100105583	yes
chr2:100659813-100662563	chr2	100043351	100046101	Aff3	chr2	99545418	100105583	yes
chr2:100698736-100700334	chr2	100082274	100083872	Aff3	chr2	99545418	100105583	yes
chr2:100724112-100724803	chr2	100107650	100108341	Aff3	chr2	99545418	100105583	yes
chr2:102051034-102052817	chr2	101434572	101436355	Map4k4	chr2	101697706	101894690	yes
chr2:102358401-102363305	chr2	101741939	101746843	Map4k4	chr2	101697706	101894690	yes
chr2:102372710-102373012	chr2	101756248	101756550	Map4k4	chr2	101697706	101894690	yes
chr2:102375149-102380099	chr2	101758687	101763637	Map4k4	chr2	101697706	101894690	yes
chr2:103782628-103783824	chr2	103166170	103167366	Pantr1	chr2	104805424	104851476	yes
chr2:104639860-104641524	chr2	104023402	104025066	Pantr1	chr2	104805424	104851476	yes
chr2:105032693-105034412	chr2	104416235	104417954	Pantr1	chr2	104805424	104851476	yes
chr2:105046404-105051798	chr2	104429946	104435340	Pou3f3	chr2	104854114	104858574	yes
chr2:105163419-105164021	chr2	104546961	104547563	Pantr1	chr2	104805424	104851476	yes
chr2:105274599-105276228	chr2	104658141	104659770	Pou3f3	chr2	104854114	104858574	yes
chr2:105481802-105483895	chr2	104865344	104867437	Pantr1	chr2	104805424	104851476	yes
chr2:105484023-105485339	chr2	104867565	104868881	Pantr1	chr2	104805424	104851476	yes
chr2:105488256-105489984	chr2	104871798	104873526	Pantr1	chr2	104805424	104851476	yes
chr2:105681884-105684290	chr2	105065426	105067832	Pantr1	chr2	104805424	104851476	yes
chr2:105697163-105698992	chr2	105080705	105082534	Pou3f3	chr2	104854114	104858574	yes
chr2:106211110-106211882	chr2	105594653	105595425	Nck2	chr2	105744648	105894274	yes
chr2:106637306-106638057	chr2	106020850	106021601	Nck2	chr2	105744648	105894274	yes
chr2:193012788-193016921	chr2	192148062	192152195	Nabp1	chr2	191678135	191686943	yes
chr2:192417020-192418192	chr2	191552294	191553466	Nabp1	chr2	191678135	191686943	yes
chr2:192136875-192137032	chr2	191272149	191272306	Myo1b	chr2	191245399	191425320	yes
chr2:202720332-202722645	chr2	201855609	201857922	Clk1	chr2	200853008	200864561	yes
chr2:202820341-202821006	chr2	201955618	201956283	Ndufb3	chr2	201071783	201085750	yes
chr2:202928170-202930801	chr2	202063447	202066078	Orc2	chr2	200908976	200963660	yes
chr2:202948624-202949822	chr2	202083901	202085099	Sumo1	chr2	202206170	202238597	yes
chr2:202978098-202979700	chr2	202113375	202114977	Ndufb3	chr2	201071783	201085750	yes
chr2:202987573-202988207	chr2	202122850	202123484	Nif3l1	chr2	200889326	200903932	yes
chr2:207462325-207464020	chr2	206597601	206599296	Fastkd2	chr2	206765605	206796189	yes
chr2:207710716-207712101	chr2	206845992	206847377	Creb1	chr2	207529942	207580528	yes
chr2:207905759-207906996	chr2	207041035	207042272	Zdbf2	chr2	206273571	206310956	yes
chr2:207910101-207910597	chr2	207045377	207045873	Ndufs1	chr2	206114816	206159209	yes
chr2:208120820-208121361	chr2	207256096	207256637	Creb1	chr2	207529942	207580528	yes
chr2:208123149-208124137	chr2	207258425	207259413	Creb1	chr2	207529942	207580528	yes
chr2:208216896-208217555	chr2	207352172	207352831	Ndufs1	chr2	206114816	206159209	yes
chr2:210334221-210335164	chr2	209469497	209470440	Acadl	chr2	210187922	210225447	yes
chr2:210442347-210446355	chr2	209577623	209581631	Rpe	chr2	210002627	210021570	yes
chr2:213314115-213317122	chr2	212449391	212452398	Cps1	chr2	210477684	210679107	yes
chr2:216825592-216826087	chr2	215960869	215961364	Fn1	chr2	215360864	215436068	yes
chr2:216947848-216949060	chr2	216083125	216084337	Xrcc5	chr2	216109347	216206293	yes
chr2:217076358-217082631	chr2	216211635	216217908	Smarcal1	chr2	216412483	216483053	yes
chr2:217101171-217101583	chr2	216236448	216236860	Smarcal1	chr2	216412483	216483053	yes
chr2:217105845-217108409	chr2	216241122	216243686	Smarcal1	chr2	216412483	216483053	yes
chr2:217111998-217112549	chr2	216247275	216247826	Smarcal1	chr2	216412483	216483053	yes
chr2:217150443-217153331	chr2	216285720	216288608	Smarcal1	chr2	216412483	216483053	yes
chr2:217291352-217292257	chr2	216426629	216427534	Rpl37a	chr2	216498843	216504086	yes
chr2:217452245-217452542	chr2	216587522	216587819	Xrcc5	chr2	216109347	216206293	yes
chr2:217471166-217471889	chr2	216606443	216607166	Xrcc5	chr2	216109347	216206293	yes
chr2:217773130-217775033	chr2	216908407	216910310	Smarcal1	chr2	216412483	216483053	yes
chr2:217798288-217799329	chr2	216933565	216934606	Smarcal1	chr2	216412483	216483053	yes
chr2:217825080-217826141	chr2	216960357	216961418	Smarcal1	chr2	216412483	216483053	yes
chr2:218395253-218395841	chr2	217530530	217531118	Xrcc5	chr2	216109347	216206293	yes
chr2:218397752-218398086	chr2	217533029	217533363	Xrcc5	chr2	216109347	216206293	yes
chr2:218702049-218703876	chr2	217837326	217839153	Igfbp5	chr2	216672104	216695549	yes
chr2:218888529-218889608	chr2	218023806	218024885	Xrcc5	chr2	216109347	216206293	yes
chr2:219820777-219821414	chr2	218956055	218956692	Cnppd1	chr2	219171896	219176925	yes
chr2:220215558-220216817	chr2	219350836	219352095	Cnppd1	chr2	219171896	219176925	yes
chr2:220371313-220374985	chr2	219506591	219510263	Cnppd1	chr2	219171896	219176925	yes
chr2:220722286-220723177	chr2	219857565	219858456	Epha4	chr2	221418026	221572304	yes
chr2:220944626-220945239	chr2	220079905	220080518	Epha4	chr2	221418026	221572304	yes
chr2:221374152-221375663	chr2	220509431	220510942	Epha4	chr2	221418026	221572304	yes
chr2:222417944-222420884	chr2	221553224	221556164	Epha4	chr2	221418026	221572304	yes
chr2:222423231-222425415	chr2	221558511	221560695	Epha4	chr2	221418026	221572304	yes
chr2:223102783-223109572	chr2	222238064	222244853	Pax3	chr2	222199886	222298998	yes
chr2:223123318-223127311	chr2	222258599	222262592	Pax3	chr2	222199886	222298998	yes
chr2:223132402-223139984	chr2	222267683	222275265	Pax3	chr2	222199886	222298998	yes
chr2:223140635-223141352	chr2	222275916	222276633	Pax3	chr2	222199886	222298998	yes
chr2:223147741-223149794	chr2	222283022	222285075	Pax3	chr2	222199886	222298998	yes
chr2:223168302-223169156	chr2	222303583	222304437	Pax3	chr2	222199886	222298998	yes
chr2:224418632-224419406	chr2	223553914	223554688	Acsl3	chr2	222861035	222944639	yes
chr2:226895284-226897510	chr2	226030568	226032794	Rhbdd1	chr2	226800158	226999210	yes
chr2:227655286-227657697	chr2	226790570	226792981	Rhbdd1	chr2	226800158	226999210	yes
chr2:227659118-227659641	chr2	226794402	226794925	Rhbdd1	chr2	226800158	226999210	yes
chr2:227700834-227701227	chr2	226836118	226836511	Rhbdd1	chr2	226800158	226999210	yes
chr2:227704109-227705443	chr2	226839393	226840727	Rhbdd1	chr2	226800158	226999210	yes
chr2:227798289-227800121	chr2	226933573	226935405	Rhbdd1	chr2	226800158	226999210	yes
chr2:229110043-229110643	chr2	228245327	228245927	Mff	chr2	227325232	227357833	yes
chr2:229194090-229194978	chr2	228329374	228330262	Mff	chr2	227325232	227357833	yes
chr2:231729706-231731409	chr2	230864991	230866694	Cab39	chr2	230712841	230821075	yes
chr2:231763550-231764313	chr2	230898835	230899598	Cab39	chr2	230712841	230821075	yes
chr2:231879656-231880675	chr2	231014941	231015960	Psmd1	chr2	231056866	231172827	yes
chr2:232456177-232456821	chr2	231591466	231592110	Dis3l2	chr2	231961712	232130886	yes
chr2:232477148-232479783	chr2	231612437	231615072	Dis3l2	chr2	231961712	232130886	yes
chr2:232543753-232549183	chr2	231679043	231684473	Dis3l2	chr2	231961712	232130886	yes
chr2:232571291-232572769	chr2	231706581	231708059	Dis3l2	chr2	231961712	232130886	yes
chr2:232748875-232749875	chr2	231884165	231885165	Dis3l2	chr2	231961712	232130886	yes
chr2:233187651-233188526	chr2	232322941	232323816	Dis3l2	chr2	231961712	232130886	yes
chr2:233432683-233434075	chr2	232567973	232569365	Dgkd	chr2	233354493	233472098	yes
chr2:235202056-235203418	chr2	234293412	234294774	Arl4c	chr2	234493040	234497049	yes
chr2:236385533-236387283	chr2	235476889	235478639	Agap1	chr2	235494042	236131793	yes
chr2:236388383-236389265	chr2	235479739	235480621	Agap1	chr2	235494042	236131793	yes
chr2:236413486-236414196	chr2	235504842	235505552	Agap1	chr2	235494042	236131793	yes
chr2:236531800-236544184	chr2	235623156	235635540	Agap1	chr2	235494042	236131793	yes
chr2:236561636-236562399	chr2	235652992	235653755	Agap1	chr2	235494042	236131793	yes
chr2:236574376-236575345	chr2	235665732	235666701	Agap1	chr2	235494042	236131793	yes
chr2:236586142-236586391	chr2	235677498	235677747	Agap1	chr2	235494042	236131793	yes
chr2:237479397-237479992	chr2	236570754	236571349	Ackr3	chr2	236537130	236582358	yes
chr2:237482524-237485113	chr2	236573881	236576470	Ackr3	chr2	236537130	236582358	yes
chr2:238510971-238525109	chr2	237602328	237616466	Ilkap	chr2	238170400	238203702	yes
chr2:239431128-239432612	chr2	238522487	238523971	Cops9	chr2	240126547	240136802	yes
chr2:240212059-240213814	chr2	239290364	239292119	Cops9	chr2	240126547	240136802	yes
chr2:240223600-240226822	chr2	239301905	239305127	Ramp1	chr2	237858554	237912114	yes
chr2:240362280-240363171	chr2	239440586	239441477	Ilkap	chr2	238170400	238203702	yes
chr2:240384608-240385735	chr2	239462914	239464041	Ilkap	chr2	238170400	238203702	yes
chr2:240726674-240728612	chr2	239804980	239806918	Ilkap	chr2	238170400	238203702	yes
chr2:242498414-242499285	chr2	241558999	241559870	Ppp1r7	chr2	241149572	241183650	yes
chr2:242786036-242786506	chr2	241843884	241844354	St8sia4	chr5	100806932	100903282	no
chr5:102142249-102143924	chr5	102806545	102808220	Ppip5k2	chr5	103120272	103183181	yes
chr5:102000134-102002494	chr5	102664430	102666790	Ppip5k2	chr5	103120272	103183181	yes
chr18:60738026-60739016	chr18	63070793	63071783	Kdsr	chr18	63327725	63367206	yes
chr2:121832614-121833240	chr2	121075038	121075664	Nifk	chr2	121726944	121736875	yes
chr2:121714426-121715024	chr2	120956850	120957448	Gli2	chr2	120735867	120992653	yes
chr2:121650792-121651701	chr2	120893216	120894125	Nifk	chr2	121726944	121736875	yes
chr2:121577524-121578291	chr2	120819949	120820716	Clasp1	chr2	121337775	121649447	yes
chr2:121515186-121516516	chr2	120757610	120758940	Nifk	chr2	121726944	121736875	yes
chr2:121198710-121200122	chr2	120441134	120442546	Nifk	chr2	121726944	121736875	yes
chr2:133508168-133509504	chr2	132750595	132751931	Actr3	chr2	113889933	113961554	yes
chr2:134261572-134261892	chr2	133504001	133504321	Nckap5	chr2	132671787	133241870	yes
chr2:134261950-134263320	chr2	133504379	133505749	Actr3	chr2	113889933	113961554	yes
chr2:134325342-134326379	chr2	133567771	133568808	Actr3	chr2	113889933	113961554	yes
chr2:134331478-134332043	chr2	133573907	133574472	Actr3	chr2	113889933	113961554	yes
chr2:134471993-134472825	chr2	133714422	133715254	Nckap5	chr2	132671787	133241870	yes
chr2:135289662-135291660	chr2	134532091	134534089	Zranb3	chr2	135196968	135530585	yes
chr2:136632495-136633977	chr2	135874925	135876407	Cxcr4	chr2	136114348	136116235	yes
chr2:136707167-136709376	chr2	135949597	135951806	Mcm6	chr2	135839625	135876443	yes
chr2:136869088-136871960	chr2	136111518	136114390	Mcm6	chr2	135839625	135876443	yes
chr2:136964057-136965029	chr2	136206487	136207459	Cxcr4	chr2	136114348	136116235	yes
chr2:136977392-136978091	chr2	136219822	136220521	Cxcr4	chr2	136114348	136116235	yes
chr2:136981682-136982263	chr2	136224112	136224693	Cxcr4	chr2	136114348	136116235	yes
chr2:137112399-137112869	chr2	136354829	136355299	Cxcr4	chr2	136114348	136116235	yes
chr2:137113993-137114072	chr2	136356423	136356502	Cxcr4	chr2	136114348	136116235	yes
chr1:206509400-206510733	chr1	206336048	206337381	Slc41a1	chr1	205789094	205813198	yes
chr1:205637828-205640705	chr1	205668700	205671577	Rbbp5	chr1	205086141	205121978	yes
chr1:205600240-205601468	chr1	205631112	205632340	Nuak2	chr1	205302058	205305540	yes
chr1:205424113-205427007	chr1	205454985	205457879	Rbbp5	chr1	205086141	205121978	yes
chr1:205413697-205415263	chr1	205444569	205446135	Rbbp5	chr1	205086141	205121978	yes
chr1:205327136-205329704	chr1	205358008	205360576	Nuak2	chr1	205302058	205305540	yes
chr1:205286029-205288513	chr1	205316901	205319385	Nuak2	chr1	205302058	205305540	yes
chr1:205282229-205285212	chr1	205313101	205316084	Rbbp5	chr1	205086141	205121978	yes
chr1:205270208-205271127	chr1	205301080	205301999	Nuak2	chr1	205302058	205305540	yes
chr1:205226836-205227813	chr1	205257708	205258685	Rbbp5	chr1	205086141	205121978	yes
chr1:205219156-205222689	chr1	205250028	205253561	Nuak2	chr1	205302058	205305540	yes
chr1:205216275-205218318	chr1	205247147	205249190	Rbbp5	chr1	205086141	205121978	yes
chr1:205017372-205017943	chr1	205048244	205048815	Tmcc2	chr1	205227945	205273343	yes
chr1:204999179-205002365	chr1	205030051	205033237	Rbbp5	chr1	205086141	205121978	yes
chr1:204995059-204998124	chr1	205025931	205028996	Rbbp5	chr1	205086141	205121978	yes
chr1:204981354-204987012	chr1	205012226	205017884	Nucks1	chr1	205712821	205750182	yes
chr1:204971532-204973348	chr1	205002404	205004220	Rbbp5	chr1	205086141	205121978	yes
chr1:204892065-204894449	chr1	204922937	204925321	Rbbp5	chr1	205086141	205121978	yes
chr1:204850174-204853135	chr1	204881046	204884007	Rbbp5	chr1	205086141	205121978	yes
chr1:204839832-204840386	chr1	204870704	204871258	Rbbp5	chr1	205086141	205121978	yes
chr1:204837017-204838246	chr1	204867889	204869118	Rbbp5	chr1	205086141	205121978	yes
chr1:204808233-204808899	chr1	204839105	204839771	Rbbp5	chr1	205086141	205121978	yes
chr1:204797838-204798594	chr1	204828710	204829466	Rbbp5	chr1	205086141	205121978	yes
chr1:204771537-204771915	chr1	204802409	204802787	Nuak2	chr1	205302058	205305540	yes
chr1:204604491-204605198	chr1	204635363	204636070	Nuak2	chr1	205302058	205305540	yes
chr1:204434898-204436428	chr1	204465770	204467300	Mdm4	chr1	204516376	204551977	yes
chr1:204423783-204425367	chr1	204454655	204456239	Sox13	chr1	204073095	204126233	yes
chr1:204326255-204329335	chr1	204357127	204360207	Sox13	chr1	204073095	204126233	yes
chr1:204318747-204320966	chr1	204349619	204351838	Snrpe	chr1	203861598	203871152	yes
chr1:204308981-204310110	chr1	204339853	204340982	Sox13	chr1	204073095	204126233	yes
chr1:204305956-204307051	chr1	204336828	204337923	Sox13	chr1	204073095	204126233	yes
chr1:204295223-204297980	chr1	204326095	204328852	Sox13	chr1	204073095	204126233	yes
chr1:204287346-204291062	chr1	204318218	204321934	Sox13	chr1	204073095	204126233	yes
chr1:204281415-204283158	chr1	204312287	204314030	Sox13	chr1	204073095	204126233	yes
chr1:204231921-204232930	chr1	204262793	204263802	Ppp1r15b	chr1	204398683	204412454	yes
chr1:204179939-204180240	chr1	204210811	204211112	Sox13	chr1	204073095	204126233	yes
chr1:204091534-204092604	chr1	204122406	204123476	Sox13	chr1	204073095	204126233	yes
chr1:204075345-204078443	chr1	204106217	204109315	Sox13	chr1	204073095	204126233	yes
chr1:204048815-204049985	chr1	204079687	204080857	Sox13	chr1	204073095	204126233	yes
chr1:204034070-204034985	chr1	204064942	204065857	Sox13	chr1	204073095	204126233	yes
chr1:204028649-204029500	chr1	204059521	204060372	Sox13	chr1	204073095	204126233	yes
chr1:203560996-203562101	chr1	203591868	203592973	Btg2	chr1	203305518	203309602	yes
chr1:203482905-203484519	chr1	203513777	203515391	Btg2	chr1	203305518	203309602	yes
chr1:203449544-203450638	chr1	203480416	203481510	Btg2	chr1	203305518	203309602	yes
chr1:203291414-203297051	chr1	203322286	203327923	Btg2	chr1	203305518	203309602	yes
chr1:203284289-203287378	chr1	203315161	203318250	Btg2	chr1	203305518	203309602	yes
chr1:203259047-203260171	chr1	203289919	203291043	Btg2	chr1	203305518	203309602	yes
chr1:203250992-203256781	chr1	203281864	203287653	Btg2	chr1	203305518	203309602	yes
chr1:203068647-203072847	chr1	203099519	203103719	Adipor1	chr1	202940824	202958396	yes
chr1:203034183-203034797	chr1	203065055	203065669	Tmem183a	chr1	203007373	203024848	yes
chr1:203004006-203004802	chr1	203034878	203035674	Adipor1	chr1	202940824	202958396	yes
chr1:202628193-202630213	chr1	202659065	202661085	Ppp1r12b	chr1	202348698	202438242	yes
chr1:202612049-202613061	chr1	202642921	202643933	Ube2t	chr1	202331656	202341936	yes
chr1:202606597-202608749	chr1	202637469	202639621	Ube2t	chr1	202331656	202341936	yes
chr1:202514822-202515102	chr1	202545694	202545974	Ppp1r12b	chr1	202348698	202438242	yes
chr1:201635092-201635658	chr1	201665964	201666530	Ipo9	chr1	201829156	201884291	yes
chr1:201596962-201598529	chr1	201627834	201629401	Ipo9	chr1	201829156	201884291	yes
chr1:201583113-201584014	chr1	201613985	201614886	Ipo9	chr1	201829156	201884291	yes
chr1:201562110-201563449	chr1	201592982	201594321	Rnpep	chr1	201982647	202006143	yes
chr1:201551365-201552798	chr1	201582237	201583670	Ipo9	chr1	201829156	201884291	yes
chr1:201528282-201528895	chr1	201559154	201559767	Ipo9	chr1	201829156	201884291	yes
chr1:201521784-201523079	chr1	201552656	201553951	Timm17a	chr1	201955502	201970664	yes
chr1:201513089-201518686	chr1	201543961	201549558	Gpr37l1	chr1	202118668	202133588	yes
chr1:201507876-201509459	chr1	201538748	201540331	Ipo9	chr1	201829156	201884291	yes
chr1:201072123-201073092	chr1	201102995	201103964	Camsap2	chr1	200738892	200860704	yes
chr1:201023505-201026240	chr1	201054377	201057112	Tmem9	chr1	201134771	201154385	yes
chr1:197701893-197703111	chr1	197732763	197733981	Lhx9	chr1	197912463	197935478	yes
chr1:193149765-193152322	chr1	193180635	193183192	B3galt2	chr1	193178729	193186613	yes
chr1:184377875-184378764	chr1	184408741	184409630	Rnf2	chr1	185045429	185102223	yes
chr1:184267406-184269006	chr1	184298272	184299872	Rnf2	chr1	185045429	185102223	yes
chr1:183571278-183573053	chr1	183602143	183603918	Arpc5	chr1	183620845	183635783	yes
chr1:183545474-183552697	chr1	183576339	183583562	Arpc5	chr1	183620845	183635783	yes
chr1:183289922-183290206	chr1	183320787	183321071	Lamc1	chr1	183023419	183145592	yes
chr1:183280285-183280846	chr1	183311150	183311711	Arpc5	chr1	183620845	183635783	yes
chr1:183148636-183150299	chr1	183179501	183181164	Arpc5	chr1	183620845	183635783	yes
chr1:182668279-182669777	chr1	182699144	182700642	Rgs16	chr1	182598622	182604389	yes
chr1:182653166-182653712	chr1	182684031	182684577	Rgs16	chr1	182598622	182604389	yes
chr1:182643822-182645269	chr1	182674687	182676134	Dhx9	chr1	182839346	182887982	yes
chr1:182640756-182642206	chr1	182671621	182673071	Rgs16	chr1	182598622	182604389	yes
chr1:182602678-182604582	chr1	182633543	182635447	Rgs16	chr1	182598622	182604389	yes
chr1:182575343-182576189	chr1	182606208	182607054	Dhx9	chr1	182839346	182887982	yes
chr1:181107689-181109618	chr1	181138553	181140482	Ier5	chr1	181088699	181092900	yes
chr1:181097748-181098343	chr1	181128612	181129207	Ier5	chr1	181088699	181092900	yes
chr1:181079408-181080008	chr1	181110272	181110872	Stx6	chr1	180972724	181022870	yes
chr1:181073503-181075982	chr1	181104367	181106846	Ier5	chr1	181088699	181092900	yes
chr1:180919363-180921292	chr1	180950227	180952156	Stx6	chr1	180972724	181022870	yes
chr1:180908301-180909027	chr1	180939165	180939891	Stx6	chr1	180972724	181022870	yes
chr1:180898687-180901081	chr1	180929551	180931945	Ier5	chr1	181088699	181092900	yes
chr1:180894705-180897833	chr1	180925569	180928697	Ier5	chr1	181088699	181092900	yes
chr1:180151703-180152725	chr1	180182568	180183590	Qsox1	chr1	180154868	180198034	yes
chr1:179072679-179075165	chr1	179103544	179106030	Tor1aip1	chr1	179882284	179920076	yes
chr1:178942492-178943752	chr1	178973357	178974617	Ralgps2	chr1	178725232	178921842	yes
chr1:178901116-178901774	chr1	178931981	178932639	Ralgps2	chr1	178725232	178921842	yes
chr1:178625550-178626590	chr1	178656415	178657455	Ralgps2	chr1	178725232	178921842	yes
chr1:178544787-178546940	chr1	178575652	178577805	Ralgps2	chr1	178725232	178921842	yes
chr1:175833806-175835077	chr1	175864670	175865941	Cop1	chr1	175944830	176184662	yes
chr1:175656274-175656754	chr1	175687138	175687618	Tnr	chr1	175315193	175743595	yes
chr1:175616112-175617732	chr1	175646976	175648596	Cop1	chr1	175944830	176184662	yes
chr1:175560469-175560640	chr1	175591333	175591504	Cop1	chr1	175944830	176184662	yes
chr1:175318754-175319598	chr1	175349618	175350462	Cop1	chr1	175944830	176184662	yes
chr1:174880598-174881658	chr1	174911461	174912521	Mrps14	chr1	175012957	175023425	yes
chr1:174487480-174489465	chr1	174518342	174520327	Mrps14	chr1	175012957	175023425	yes
chr1:173446520-173448234	chr1	173477381	173479095	Prdx6	chr1	173477334	173488815	yes
chr1:172412663-172413181	chr1	172443523	172444041	Prdx6	chr1	173477334	173488815	yes
chr1:172248702-172249085	chr1	172279562	172279945	Prrc2c	chr1	171485495	171593511	yes
chr1:168105235-168107062	chr1	168135997	168137824	Pou2f1	chr1	167220877	167427340	yes
chr1:167457728-167459232	chr1	167488491	167489995	Pou2f1	chr1	167220877	167427340	yes
chr1:167436554-167437038	chr1	167467317	167467801	Pou2f1	chr1	167220877	167427340	yes
chr1:167297415-167298773	chr1	167328178	167329536	Pou2f1	chr1	167220877	167427340	yes
chr1:167144666-167144868	chr1	167175429	167175631	Pou2f1	chr1	167220877	167427340	yes
chr1:166943947-166945092	chr1	166974710	166975855	Pou2f1	chr1	167220877	167427340	yes
chr1:166918940-166920900	chr1	166949703	166951663	Pou2f1	chr1	167220877	167427340	yes
chr1:166915912-166917826	chr1	166946675	166948589	Pou2f1	chr1	167220877	167427340	yes
chr1:166243351-166248929	chr1	166274114	166279692	Uck2	chr1	165827613	165911618	yes
chr1:166235122-166240248	chr1	166265885	166271011	Pogk	chr1	166839474	166856359	yes
chr1:166122700-166124604	chr1	166153463	166155367	Uck2	chr1	165827613	165911618	yes
chr1:166001715-166002350	chr1	166032478	166033113	Uck2	chr1	165827613	165911618	yes
chr1:166001414-166001636	chr1	166032177	166032399	Uck2	chr1	165827613	165911618	yes
chr1:165923991-165925716	chr1	165954754	165956479	Uck2	chr1	165827613	165911618	yes
chr1:165853675-165854310	chr1	165884438	165885073	Tmco1	chr1	165724290	165768922	yes
chr1:165792905-165793798	chr1	165823668	165824561	Uck2	chr1	165827613	165911618	yes
chr1:164810932-164812642	chr1	164841695	164843405	Pbx1	chr1	164559183	164851830	yes
chr1:164728603-164730347	chr1	164759366	164761110	Pbx1	chr1	164559183	164851830	yes
chr1:164691805-164693438	chr1	164722568	164724201	Pbx1	chr1	164559183	164851830	yes
chr1:164685140-164686330	chr1	164715903	164717093	Pbx1	chr1	164559183	164851830	yes
chr1:164676447-164683878	chr1	164707210	164714641	Pbx1	chr1	164559183	164851830	yes
chr1:164658823-164661614	chr1	164689586	164692377	Pbx1	chr1	164559183	164851830	yes
chr1:164619187-164621795	chr1	164649950	164652558	Pbx1	chr1	164559183	164851830	yes
chr1:164613748-164614738	chr1	164644511	164645501	Pbx1	chr1	164559183	164851830	yes
chr1:164602982-164607530	chr1	164633745	164638293	Pbx1	chr1	164559183	164851830	yes
chr1:164578607-164580166	chr1	164609370	164610929	Pbx1	chr1	164559183	164851830	yes
chr1:164544438-164546011	chr1	164575201	164576774	Pbx1	chr1	164559183	164851830	yes
chr1:164487993-164489144	chr1	164518756	164519907	Pbx1	chr1	164559183	164851830	yes
chr1:162280438-162280973	chr1	162310648	162311183	Uap1	chr1	162561530	162599837	yes
chr1:162218873-162219805	chr1	162249083	162250015	Uap1	chr1	162561530	162599837	yes
chr1:161980046-161981763	chr1	162010256	162011973	Uap1	chr1	162561530	162599837	yes
chr1:161978390-161979247	chr1	162008600	162009457	Uap1	chr1	162561530	162599837	yes
chr1:161973143-161973854	chr1	162003353	162004064	Atf6	chr1	161766319	161964070	yes
chr1:161964074-161964432	chr1	161994284	161994642	Uap1	chr1	162561530	162599837	yes
chr1:161230487-161231678	chr1	161260697	161261888	Apoa2	chr1	161222291	161223628	yes
chr1:161167757-161168891	chr1	161197967	161199101	Apoa2	chr1	161222291	161223628	yes
chr1:160379611-160384029	chr1	160409821	160414239	Vangl2	chr1	160400563	160428670	yes
chr1:160343777-160346869	chr1	160373987	160377079	Vangl2	chr1	160400563	160428670	yes
chr1:160340151-160342536	chr1	160370361	160372746	Vangl2	chr1	160400563	160428670	yes
chr1:160328894-160331031	chr1	160359104	160361241	Pex19	chr1	160276806	160285133	yes
chr1:160230715-160232260	chr1	160260925	160262470	Vangl2	chr1	160400563	160428670	yes
chr1:160118962-160119588	chr1	160149172	160149798	Vangl2	chr1	160400563	160428670	yes
chr1:160060214-160061676	chr1	160090424	160091886	Igsf8	chr1	160091338	160098828	yes
chr1:159914020-159915378	chr1	159944230	159945588	Igsf9	chr1	159927040	159945613	yes
chr1:159910577-159912061	chr1	159940787	159942271	Igsf9	chr1	159927040	159945613	yes
chr1:159165184-159166016	chr1	159195394	159196226	Igsf9	chr1	159927040	159945613	yes
chr1:159163663-159164509	chr1	159193873	159194719	Igsf9	chr1	159927040	159945613	yes
chr1:159149297-159150995	chr1	159179507	159181205	Cadm3	chr1	159171591	159202012	yes
chr1:243327923-243329327	chr1	243164621	243166025	Zbtb18	chr1	244048652	244057476	yes
chr1:243554618-243562335	chr1	243391316	243399033	Zbtb18	chr1	244048652	244057476	yes
chr1:243569453-243570594	chr1	243406151	243407292	Zbtb18	chr1	244048652	244057476	yes
chr1:243578735-243581150	chr1	243415433	243417848	Zbtb18	chr1	244048652	244057476	yes
chr1:243628093-243628961	chr1	243464791	243465659	Sdccag8	chr1	243256040	243500091	yes
chr1:243632055-243639941	chr1	243468753	243476639	Akt3	chr1	243488232	243843282	yes
chr1:243874809-243877982	chr1	243711507	243714680	Akt3	chr1	243488232	243843282	yes
chr1:244094384-244094901	chr1	243931082	243931599	Akt3	chr1	243488232	243843282	yes
chr1:244124575-244125781	chr1	243961273	243962479	Akt3	chr1	243488232	243843282	yes
chr1:244219837-244220574	chr1	244056535	244057272	Akt3	chr1	243488232	243843282	yes
chr1:244221242-244222259	chr1	244057940	244058957	Akt3	chr1	243488232	243843282	yes
chr1:244227948-244229206	chr1	244064646	244065904	Zbtb18	chr1	244048652	244057476	yes
chr1:244324180-244324698	chr1	244160878	244161396	Akt3	chr1	243488232	243843282	yes
chr1:244334366-244336256	chr1	244171064	244172954	Zbtb18	chr1	244048652	244057476	yes
chr1:244394855-244395418	chr1	244231553	244232116	Sdccag8	chr1	243256040	243500091	yes
chr1:244401934-244403828	chr1	244238632	244240526	Zbtb18	chr1	244048652	244057476	yes
chr1:244434657-244436182	chr1	244271355	244272880	Zbtb18	chr1	244048652	244057476	yes
chr1:226950356-226954173	chr1	226762655	226766472	Parp1	chr1	226360690	226408093	yes
chr1:226308917-226309606	chr1	226121216	226121905	Lin9	chr1	226231148	226309503	yes
chr1:224996683-224997212	chr1	224808981	224809510	Lbr	chr1	225401501	225427904	yes
chr1:225047507-225050000	chr1	224859805	224862298	Lbr	chr1	225401501	225427904	yes
chr1:224237776-224237848	chr1	224050074	224050146	Capn2	chr1	223701596	223776018	yes
chr1:223428291-223429893	chr1	223254949	223256551	Enah	chr1	225486828	225653123	yes
chr1:223353571-223363879	chr1	223180229	223190537	Enah	chr1	225486828	225653123	yes
chr1:223350976-223352205	chr1	223177634	223178863	Enah	chr1	225486828	225653123	yes
chr1:223307322-223308266	chr1	223133980	223134924	Enah	chr1	225486828	225653123	yes
chr1:220113653-220114480	chr1	219940311	219941138	Bpnt1	chr1	220057481	220089788	yes
chr1:218689893-218691395	chr1	218516551	218518053	Tgfb2	chr1	218345335	218444619	yes
chr1:217029685-217030729	chr1	216856343	216857387	Gpatch2	chr1	217426991	217631090	yes
chr1:215633132-215635614	chr1	215459789	215462271	Kctd3	chr1	215567303	215621807	yes
chr1:215598254-215598898	chr1	215424911	215425555	Kctd3	chr1	215567303	215621807	yes
chr1:215398944-215401371	chr1	215225601	215228028	Kctd3	chr1	215567303	215621807	yes
chr1:214191466-214193897	chr1	214018123	214020554	Cenpf	chr1	214603194	214664564	yes
chr1:213561859-213563292	chr1	213388516	213389949	Cenpf	chr1	214603194	214664564	yes
chr1:213498491-213500828	chr1	213325148	213327485	Cenpf	chr1	214603194	214664564	yes
chr1:213455053-213455798	chr1	213281710	213282455	Prox1	chr1	213983238	214041253	yes
chr1:213162706-213163742	chr1	212989364	212990400	Tatdn3	chr1	212791832	212816626	yes
chr1:212732152-212732502	chr1	212558810	212559160	Ints7	chr1	211940327	212035545	yes
chr1:212410045-212410558	chr1	212236703	212237216	Angel2	chr1	212992181	213015478	yes
chr1:212386232-212387491	chr1	212212890	212214149	Nsl1	chr1	212726152	212791777	yes
chr1:211851528-211854480	chr1	211678186	211681138	Vash2	chr1	212950540	212991585	yes
chr1:211026504-211038730	chr1	210853162	210865388	Rcor3	chr1	211259365	211313298	yes
chr1:210960165-210961179	chr1	210786823	210787837	Sertad4	chr1	210232795	210246255	yes
chr1:210916447-210916677	chr1	210743105	210743335	Rcor3	chr1	211259365	211313298	yes
chr1:210806924-210807878	chr1	210633580	210634534	Sertad4	chr1	210232795	210246255	yes
chr1:210791150-210792625	chr1	210617806	210619281	Sertad4	chr1	210232795	210246255	yes
chr1:210566641-210567498	chr1	210393297	210394154	Rcor3	chr1	211259365	211313298	yes
chr1:210526614-210527369	chr1	210353270	210354025	Sertad4	chr1	210232795	210246255	yes
chr1:210424328-210425650	chr1	210250983	210252305	Sertad4	chr1	210232795	210246255	yes
chr1:210409720-210411497	chr1	210236375	210238152	Sertad4	chr1	210232795	210246255	yes
chr1:209936076-209936974	chr1	209762731	209763629	Cd34	chr1	207880971	207911125	yes
chr1:209932753-209934630	chr1	209759408	209761285	Cd34	chr1	207880971	207911125	yes
chr1:209848388-209849557	chr1	209675043	209676212	Plxna2	chr1	208022241	208244384	yes
chr1:209816289-209817151	chr1	209642944	209643806	Cd34	chr1	207880971	207911125	yes
chr1:209734272-209735861	chr1	209560927	209562516	Plxna2	chr1	208022241	208244384	yes
chr1:209689555-209691131	chr1	209516210	209517786	Plxna2	chr1	208022241	208244384	yes
chr1:209662723-209663976	chr1	209489378	209490631	Plxna2	chr1	208022241	208244384	yes
chr1:209376677-209377124	chr1	209203332	209203779	Plxna2	chr1	208022241	208244384	yes
chr1:209330921-209331328	chr1	209157576	209157983	Plxna2	chr1	208022241	208244384	yes
chr1:209065359-209067485	chr1	208892014	208894140	Plxna2	chr1	208022241	208244384	yes
chr1:209015362-209016166	chr1	208842017	208842821	Plxna2	chr1	208022241	208244384	yes
chr1:208905186-208906394	chr1	208731841	208733049	Plxna2	chr1	208022241	208244384	yes
chr1:208843703-208844824	chr1	208670358	208671479	Plxna2	chr1	208022241	208244384	yes
chr1:208825051-208825734	chr1	208651706	208652389	Plxna2	chr1	208022241	208244384	yes
chr1:208821667-208822269	chr1	208648322	208648924	Plxna2	chr1	208022241	208244384	yes
chr1:208412336-208414711	chr1	208238991	208241366	Plxna2	chr1	208022241	208244384	yes
chr1:208406687-208407930	chr1	208233342	208234585	Plxna2	chr1	208022241	208244384	yes
chr1:208397867-208398546	chr1	208224522	208225201	Plxna2	chr1	208022241	208244384	yes
chr1:208371335-208372661	chr1	208197990	208199316	Plxna2	chr1	208022241	208244384	yes
chr1:208305978-208307715	chr1	208132633	208134370	Plxna2	chr1	208022241	208244384	yes
chr1:208041785-208042465	chr1	207868440	207869120	Plxna2	chr1	208022241	208244384	yes
chr6:151710891-151713617	chr6	151389756	151392482	Fbxo5	chr6	152970534	152983041	yes
chr6:151313466-151315902	chr6	150992330	150994766	Akap12	chr6	151239814	151358537	yes
chr6:150523133-150525984	chr6	150201997	150204848	Akap12	chr6	151239814	151358537	yes
chr6:150518412-150520681	chr6	150197276	150199545	Akap12	chr6	151239814	151358537	yes
chr6:149549396-149550929	chr6	149228260	149229793	Katna1	chr6	149594872	149648511	yes
chr6:148830564-148831616	chr6	148509428	148510480	Katna1	chr6	149594872	149648511	yes
chr6:148829708-148830023	chr6	148508572	148508887	Nup43	chr6	149724314	149746520	yes
chr6:148201899-148202937	chr6	147880763	147881801	Katna1	chr6	149594872	149648511	yes
chr6:146285118-146285410	chr6	145963982	145964274	Shprh	chr6	145857837	145964285	yes
chr6:144293203-144294998	chr6	143972066	143973861	Plagl1	chr6	143940299	144055262	yes
chr6:144282605-144284181	chr6	143961468	143963044	Plagl1	chr6	143940299	144055262	yes
chr6:144278318-144280577	chr6	143957181	143959440	Plagl1	chr6	143940299	144055262	yes
chr6:143894607-143895528	chr6	143573470	143574391	Plagl1	chr6	143940299	144055262	yes
chr6:143557212-143558426	chr6	143236075	143237289	Hivep2	chr6	142751468	142917786	yes
chr6:143448389-143450736	chr6	143127252	143129599	Hivep2	chr6	142751468	142917786	yes
chr6:143247533-143248283	chr6	142926396	142927146	Adat2	chr6	143422831	143442677	yes
chr6:143143554-143144799	chr6	142822417	142823662	Hivep2	chr6	142751468	142917786	yes
chr6:143017358-143017894	chr6	142696221	142696757	Hivep2	chr6	142751468	142917786	yes
chr6:140373413-140373902	chr6	140052276	140052765	Abracl	chr6	139028744	139043302	yes
chr6:140309641-140309955	chr6	139988504	139988818	Abracl	chr6	139028744	139043302	yes
chr6:140097243-140100437	chr6	139776106	139779300	Abracl	chr6	139028744	139043302	yes
chr6:139966079-139970778	chr6	139644942	139649641	Abracl	chr6	139028744	139043302	yes
chr6:139795422-139796970	chr6	139474285	139475833	Reps1	chr6	138903492	138988253	yes
chr6:139582848-139584848	chr6	139261711	139263711	Txlnb	chr6	139159161	139292149	yes
chr6:137997739-137997882	chr6	137676602	137676745	Olig3	chr6	137492198	137494394	yes
chr6:134956834-134957963	chr6	134635696	134636825	Sgk1	chr6	134169247	134318112	yes
chr6:134408716-134410045	chr6	134087578	134088907	Tbpl1	chr6	133952173	133990432	yes
chr6:134356020-134357753	chr6	134034882	134036615	Tbpl1	chr6	133952173	133990432	yes
chr6:132488888-132490370	chr6	132167748	132169230	Ccn2	chr6	131948175	131951372	yes
chr6:131676060-131678703	chr6	131354920	131357563	Med23	chr6	131573965	131628242	yes
chr6:112248813-112249430	chr6	111927610	111928227	Tube1	chr6	112070662	112087482	yes
chr6:112091625-112093842	chr6	111770422	111772639	Tube1	chr6	112070662	112087482	yes
chr6:112068151-112069857	chr6	111746948	111748654	Tube1	chr6	112070662	112087482	yes
chr6:112005353-112009525	chr6	111684150	111688322	Tube1	chr6	112070662	112087482	yes
chr6:111993292-111996030	chr6	111672089	111674827	Tube1	chr6	112070662	112087482	yes
chr6:111987754-111989880	chr6	111666551	111668677	Tube1	chr6	112070662	112087482	yes
chr6:111972272-111975417	chr6	111651069	111654214	Tube1	chr6	112070662	112087482	yes
chr6:111945471-111949420	chr6	111624268	111628217	Tube1	chr6	112070662	112087482	yes
chr6:111872595-111874461	chr6	111551392	111553258	Tube1	chr6	112070662	112087482	yes
chr6:111858969-111859701	chr6	111537766	111538498	Tube1	chr6	112070662	112087482	yes
chr6:111094837-111096892	chr6	110773634	110775689	Cdk19	chr6	110609977	110643409	yes
chr6:110719969-110720123	chr6	110398766	110398920	Cdc40	chr6	110180426	110232232	yes
chr6:109269282-109270184	chr6	108948079	108948981	Foxo3	chr6	108559824	108684774	yes
chr6:109266568-109267356	chr6	108945365	108946153	Cep57l1	chr6	109095162	109174418	yes
chr6:109102355-109103168	chr6	108781152	108781965	Cep57l1	chr6	109095162	109174418	yes
chr6:109088921-109089198	chr6	108767718	108767995	Cep57l1	chr6	109095162	109174418	yes
chr6:109066051-109066958	chr6	108744848	108745755	Foxo3	chr6	108559824	108684774	yes
chr6:108145262-108146725	chr6	107824058	107825521	Sec63	chr6	107867755	107958208	yes
chr6:107931285-107932943	chr6	107610081	107611739	Sec63	chr6	107867755	107958208	yes
chr6:107899960-107900569	chr6	107578756	107579365	Sec63	chr6	107867755	107958208	yes
chr6:107878933-107880054	chr6	107557729	107558850	Sec63	chr6	107867755	107958208	yes
chr6:107876305-107877412	chr6	107555101	107556208	Sec63	chr6	107867755	107958208	yes
chr6:107868174-107869142	chr6	107546970	107547938	Sec63	chr6	107867755	107958208	yes
chr6:107645635-107646463	chr6	107324431	107325259	Sec63	chr6	107867755	107958208	yes
chr6:107613908-107615532	chr6	107292704	107294328	Sec63	chr6	107867755	107958208	yes
chr6:107587666-107588744	chr6	107266462	107267540	Sec63	chr6	107867755	107958208	yes
chr6:107366971-107368115	chr6	107045767	107046911	Sec63	chr6	107867755	107958208	yes
chr6:105935861-105937218	chr6	105487986	105489343	Prep	chr6	105273217	105403082	yes
chr6:105932779-105933739	chr6	105484904	105485864	Prep	chr6	105273217	105403082	yes
chr6:105736833-105737834	chr6	105288958	105289959	Prep	chr6	105273217	105403082	yes
chr6:118421827-118422529	chr6	118100664	118101366	Asf1a	chr6	118894151	118909171	yes
chr6:118990108-118990950	chr6	118668945	118669787	Asf1a	chr6	118894151	118909171	yes
chr6:119030196-119031101	chr6	118709033	118709938	Cep85l	chr6	118460771	118538754	yes
chr2:109938615-109939868	chr2	109322159	109323412	P4ha1	chr10	73007216	73096866	no
chr2:110055025-110057095	chr2	109438569	109440639	Ranbp2	chr2	108719445	108762054	yes
chr10:74472037-74472733	chr10	72712279	72712975	Micu1	chr10	72367338	72626095	yes
chr1:247991032-247991700	chr1	247827730	247828398	Micu1	chr10	72367338	72626095	no
chr10:74113754-74114683	chr10	72353996	72354925	Ranbp2	chr2	108719445	108762054	no
chr10:74091248-74094716	chr10	72331490	72334958	Ranbp2	chr2	108719445	108762054	no
chr10:73102021-73102733	chr10	71342264	71342976	Slc29a3	chr10	71319258	71363385	yes
chr10:72993116-72994377	chr10	71233359	71234620	Slc29a3	chr10	71319258	71363385	yes
chr10:72984309-72985701	chr10	71224552	71225944	Unc5b	chr10	71212569	71302864	yes
chr10:72457548-72457935	chr10	70697792	70698179	Tbata	chr10	70771236	70785401	yes
chr10:72270414-72271193	chr10	70510658	70511437	Tbata	chr10	70771236	70785401	yes
chr10:71855283-71855619	chr10	70095527	70095863	Tspan15	chr10	69451463	69549508	yes
chr10:65471503-65473714	chr10	63711743	63713954	Reep3	chr10	63521352	63608877	yes
chr10:65387641-65390344	chr10	63627881	63630584	Reep3	chr10	63521352	63608877	yes
chr10:65321158-65322550	chr10	63561398	63562790	Reep3	chr10	63521352	63608877	yes
chr10:65297125-65298880	chr10	63537365	63539120	Jmjd1c	chr10	63167220	63380464	yes
chr10:63840127-63842116	chr10	62080368	62082357	Arid5b	chr10	61901698	62096944	yes
chr10:63808780-63809252	chr10	62049021	62049493	Arid5b	chr10	61901698	62096944	yes
chr10:63422927-63424155	chr10	61663169	61664397	Arid5b	chr10	61901698	62096944	yes
chr10:62703243-62705070	chr10	60943485	60945312	Arid5b	chr10	61901698	62096944	yes
chr10:62221166-62222405	chr10	60461408	60462647	Cdk1	chr10	60778330	60787069	yes
chr10:62167422-62168567	chr10	60407664	60408809	Cdk1	chr10	60778330	60787069	yes
chr10:62158966-62159686	chr10	60399208	60399928	Phyhipl	chr10	59175871	59247399	yes
chr10:62146193-62150403	chr10	60386435	60390645	Phyhipl	chr10	59175871	59247399	yes
chr10:62126190-62129479	chr10	60366432	60369721	Phyhipl	chr10	59175871	59247399	yes
chr10:62110298-62114256	chr10	60350540	60354498	Phyhipl	chr10	59175871	59247399	yes
chr10:62050194-62050847	chr10	60290436	60291089	Phyhipl	chr10	59175871	59247399	yes
chr10:61667995-61668564	chr10	59908237	59908806	Tfam	chr10	58385408	58390854	yes
chr10:61644890-61646150	chr10	59885132	59886392	Cdk1	chr10	60778330	60787069	yes
chr10:61615383-61618119	chr10	59855625	59858361	Cdk1	chr10	60778330	60787069	yes
chr10:61563190-61563683	chr10	59803432	59803925	Cdk1	chr10	60778330	60787069	yes
chr10:61512407-61513371	chr10	59752649	59753613	Phyhipl	chr10	59175871	59247399	yes
chr10:61078398-61079705	chr10	59318638	59319945	Tfam	chr10	58385408	58390854	yes
chr10:61043145-61044239	chr10	59283385	59284479	Cdk1	chr10	60778330	60787069	yes
chr10:60555624-60557002	chr10	58795864	58797242	Cdk1	chr10	60778330	60787069	yes
chr10:59827765-59830847	chr10	58068005	58071087	Zwint	chr10	56357226	56361259	yes
chr22:24212561-24213310	chr22	23870374	23871123	Smarcb1	chr22	23786965	23838009	yes
chr22:24180870-24182059	chr22	23838683	23839872	Smarcb1	chr22	23786965	23838009	yes
chr22:24131521-24132389	chr22	23789334	23790202	Smarcb1	chr22	23786965	23838009	yes
chr22:23375262-23375871	chr22	23033086	23033695	Col6a2	chr21	46098111	46129801	no
chr21:47314109-47314339	chr21	45894195	45894425	Col6a1	chr21	45981769	46005048	yes
chr21:47295815-47297888	chr21	45875901	45877974	Smarcb1	chr22	23786965	23838009	no
chr21:46993720-46994566	chr21	45573806	45574652	S100b	chr21	46598603	46605082	yes
chr21:46991185-46992057	chr21	45571271	45572143	Ddt	chr22	23971369	23974441	no
chr21:46839829-46840947	chr21	45419914	45421032	Ube2g2	chr21	44768579	44801820	yes
chr21:46825420-46826655	chr21	45405505	45406740	Ube2g2	chr21	44768579	44801820	yes
chr21:45553596-45554050	chr21	44133714	44134168	Pfkl	chr21	44300039	44327373	yes
chr21:45363902-45364688	chr21	43944021	43944807	Agpat3	chr21	43865159	43987140	yes
chr19:719270-720899	chr19	719270	720899	Midn	chr19	1248551	1259143	yes
chr19:782739-782952	chr19	782739	782952	Mrpl54	chr19	3762681	3767565	yes
chr19:934924-935325	chr19	934924	935325	Dazap1	chr19	1407585	1435684	yes
chr19:1301247-1305099	chr19	1301248	1305100	Tcf3	chr19	1609291	1651708	yes
chr19:1333772-1334119	chr19	1333773	1334120	Tcf3	chr19	1609291	1651708	yes
chr19:1446177-1446931	chr19	1446178	1446932	Med16	chr19	867960	893208	yes
chr19:1493245-1495306	chr19	1493246	1495307	Slc39a3	chr19	2732523	2740017	yes
chr19:1566212-1567717	chr19	1566213	1567718	Mob3a	chr19	2071035	2085334	yes
chr19:4064594-4065683	chr19	4064596	4065685	Mrpl54	chr19	3762681	3767565	yes
chr19:4007778-4008191	chr19	4007780	4008193	Btbd2	chr19	1985437	1991926	yes
chr19:3456103-3463920	chr19	3456105	3463922	Sgta	chr19	2754713	2783317	yes
chr19:3387633-3404936	chr19	3387635	3404938	Uqcr11	chr19	1597168	1605462	yes
chr12:104850569-104851798	chr12	104456791	104458020	Nopchap1	chr12	104986315	105017625	yes
chr12:104891643-104892658	chr12	104497865	104498880	Nopchap1	chr12	104986315	105017625	yes
chr12:106442311-106443719	chr12	106048533	106049941	Nuak1	chr12	106063344	106138954	yes
chr12:106472919-106473565	chr12	106079141	106079787	Nuak1	chr12	106063344	106138954	yes
chr12:106883302-106884986	chr12	106489524	106491208	Rfx4	chr12	106583003	106762803	yes
chr12:106886467-106888688	chr12	106492689	106494910	Rfx4	chr12	106583003	106762803	yes
chr12:107103345-107104513	chr12	106709567	106710735	Rfx4	chr12	106583003	106762803	yes
chr12:107116410-107116611	chr12	106722632	106722833	Rfx4	chr12	106583003	106762803	yes
chr12:107168128-107168737	chr12	106774350	106774959	Rfx4	chr12	106583003	106762803	yes
chr12:107231896-107234662	chr12	106838118	106840884	Rfx4	chr12	106583003	106762803	yes
chr12:107235256-107236097	chr12	106841478	106842319	Rfx4	chr12	106583003	106762803	yes
chr22:33040585-33041613	chr22	32644599	32645627	Rtcb	chr22	32387581	32412247	yes
chr22:33217216-33217640	chr22	32821230	32821654	Timp3	chr22	32801704	32863041	yes
chr22:33218973-33219567	chr22	32822987	32823581	Timp3	chr22	32801704	32863041	yes
chr22:33222869-33223345	chr22	32826883	32827359	Timp3	chr22	32801704	32863041	yes
chr12:103922821-103925650	chr12	103529043	103531872	Ascl1	chr12	102957673	102960513	yes
chr12:103695829-103696342	chr12	103302051	103302564	Ascl1	chr12	102957673	102960513	yes
chr12:103533738-103534905	chr12	103139960	103141127	Ascl1	chr12	102957673	102960513	yes
chr12:103354367-103356500	chr12	102960589	102962722	Ascl1	chr12	102957673	102960513	yes
chr12:102800123-102800963	chr12	102406345	102407185	Nup37	chr12	102073102	102120114	yes
chr12:99605428-99605954	chr12	99211650	99212176	Scyl2	chr12	100267176	100341715	yes
chr12:99460608-99460932	chr12	99066830	99067154	Actr6	chr12	100200814	100224424	yes
chr12:99340300-99341516	chr12	98946522	98947738	Tmpo	chr12	98515572	98535634	yes
chr12:99326880-99329443	chr12	98933102	98935665	Slc25a3	chr12	98593685	98606367	yes
chr12:98896830-98898005	chr12	98503052	98504227	Tmpo	chr12	98515572	98535634	yes
chr12:98885032-98885352	chr12	98491254	98491574	Tmpo	chr12	98515572	98535634	yes
chr12:98548476-98549342	chr12	98154698	98155564	Nedd1	chr12	96907221	96953351	yes
chr12:98413910-98415693	chr12	98020132	98021915	Nedd1	chr12	96907221	96953351	yes
chr12:97950068-97951063	chr12	97556290	97557285	Nedd1	chr12	96907221	96953351	yes
chr12:97668971-97670495	chr12	97275193	97276717	Nedd1	chr12	96907221	96953351	yes
chr12:97468862-97470603	chr12	97075084	97076825	Nedd1	chr12	96907221	96953351	yes
chr12:97232646-97235454	chr12	96838868	96841676	Nedd1	chr12	96907221	96953351	yes
chr12:97179298-97179683	chr12	96785520	96785905	Nedd1	chr12	96907221	96953351	yes
chr12:96789143-96789814	chr12	96395365	96396036	Snrpf	chr12	95858951	95866140	yes
chr12:96761719-96762626	chr12	96367941	96368848	Elk3	chr12	96194374	96269824	yes
chr12:96189475-96190456	chr12	95795697	95796678	Elk3	chr12	96194374	96269824	yes
chr12:96182407-96184926	chr12	95788629	95791148	Snrpf	chr12	95858951	95866140	yes
chr12:96068234-96068918	chr12	95674458	95675142	Snrpf	chr12	95858951	95866140	yes
chr12:95867374-95869189	chr12	95473598	95475413	Nr2c1	chr12	95020228	95073618	yes
chr12:95540169-95540886	chr12	95146393	95147110	Nr2c1	chr12	95020228	95073618	yes
chr12:95489013-95491833	chr12	95095237	95098057	Metap2	chr12	95474151	95515839	yes
chr12:95355051-95355992	chr12	94961275	94962216	Nr2c1	chr12	95020228	95073618	yes
chr12:95310241-95311093	chr12	94916465	94917317	Fgd6	chr12	95076748	95217467	yes
chr12:95106609-95107373	chr12	94712833	94713597	Tmcc3	chr12	94567121	94650557	yes
chr12:94926375-94929943	chr12	94532599	94536167	Nr2c1	chr12	95020228	95073618	yes
chr12:94674049-94674629	chr12	94280273	94280853	Nr2c1	chr12	95020228	95073618	yes
chr12:94291558-94291961	chr12	93897782	93898185	Socs2	chr12	93572482	93586288	yes
chr12:94287173-94288680	chr12	93893397	93894904	Socs2	chr12	93572482	93586288	yes
chr12:94153395-94153951	chr12	93759619	93760175	Socs2	chr12	93572482	93586288	yes
chr12:92755600-92759512	chr12	92361824	92365736	Btg1	chr12	92140277	92145846	yes
chr12:92290148-92291352	chr12	91896372	91897576	Btg1	chr12	92140277	92145846	yes
chr12:83150103-83151098	chr12	82756324	82757319	Tmtc2	chr12	82686905	82965968	yes
chr12:82493872-82494573	chr12	82100093	82100794	Ppfia2	chr12	81257974	81369369	yes
chr12:77259738-77260747	chr12	76865958	76866967	Csrp2	chr12	76858708	76879019	yes
chr12:77172363-77172400	chr12	76778583	76778620	Zdhhc17	chr12	76764114	76853696	yes
chr12:76549024-76549293	chr12	76155244	76155513	Nap1l1	chr12	76036584	76084685	yes
chr12:76057468-76058406	chr12	75663688	75664626	Nap1l1	chr12	76036584	76084685	yes
chr12:70932928-70934330	chr12	70539148	70540550	Kcnmb4	chr12	70366219	70414002	yes
chr12:70690560-70691011	chr12	70296780	70297231	Cnot2	chr12	70242992	70354650	yes
chr12:70236409-70238970	chr12	69842629	69845190	Kcnmb4	chr12	70366219	70414002	yes
chr12:68932813-68933221	chr12	68539033	68539441	Nup107	chr12	68686970	68742688	yes
chr12:68285811-68287457	chr12	67892031	67893677	Dyrk2	chr12	67648744	67665406	yes
chr12:68091934-68092838	chr12	67698154	67699058	Cand1	chr12	67269357	67319953	yes
chr12:66460415-66460815	chr12	66066635	66067035	Hmga2	chr12	65824459	65952536	yes
chr12:66289184-66290814	chr12	65895404	65897034	Hmga2	chr12	65824459	65952536	yes
chr12:66006707-66006897	chr12	65612927	65613117	Tbc1d30	chr12	64759483	64881033	yes
chr12:65939529-65940589	chr12	65545749	65546809	Hmga2	chr12	65824459	65952536	yes
chr12:65687080-65688314	chr12	65293300	65294534	Hmga2	chr12	65824459	65952536	yes
chr12:65339845-65340438	chr12	64946065	64946658	Llph	chr12	66116554	66130750	yes
chr12:65073170-65074770	chr12	64679390	64680990	Tmbim4	chr12	66135845	66169996	yes
chr12:65069230-65071837	chr12	64675450	64678057	Gns	chr12	64713448	64759406	yes
chr12:65059913-65060470	chr12	64666133	64666690	Rassf3	chr12	64610494	64697564	yes
chr12:65013237-65014140	chr12	64619457	64620360	Tbk1	chr12	64452104	64502114	yes
chr12:64963977-64964713	chr12	64570197	64570933	Tbk1	chr12	64452104	64502114	yes
chr12:63305275-63308398	chr12	62911495	62914618	Ppm1h	chr12	62643991	62934452	yes
chr12:63294861-63295684	chr12	62901081	62901904	Ppm1h	chr12	62643991	62934452	yes
chr12:63292264-63292723	chr12	62898484	62898943	Ppm1h	chr12	62643991	62934452	yes
chr12:63255297-63261048	chr12	62861517	62867268	Ppm1h	chr12	62643991	62934452	yes
chr12:63108035-63109830	chr12	62714255	62716050	Mon2	chr12	62466816	62598956	yes
chr12:63105204-63107372	chr12	62711424	62713592	Mon2	chr12	62466816	62598956	yes
chr12:63049736-63053107	chr12	62655956	62659327	Mon2	chr12	62466816	62598956	yes
chr12:63022287-63023890	chr12	62628507	62630110	Mon2	chr12	62466816	62598956	yes
chr12:59310687-59312379	chr12	58916906	58918598	Lrig3	chr12	58872154	58919505	yes
chr12:59196054-59196871	chr12	58802272	58803089	Lrig3	chr12	58872154	58919505	yes
chr12:58262868-58263861	chr12	57869085	57870078	Mettl1	chr12	57768470	57772105	yes
chr12:57939749-57940972	chr12	57545966	57547189	Zbtb39	chr12	56998835	57006546	yes
chr12:57823709-57825172	chr12	57429926	57431389	Prim1	chr12	56731579	56752323	yes
chr12:57631914-57637148	chr12	57238131	57243365	Tsfm	chr12	57782786	57802856	yes
chr12:57602079-57602914	chr12	57208296	57209131	Naca	chr12	56712426	56725299	yes
chr12:56628627-56629509	chr12	56234843	56235725	Rab5b	chr12	55973948	55996683	yes
chr12:56414681-56415897	chr12	56020897	56022113	Cnpy2	chr12	56309843	56315988	yes
chr12:56138696-56140189	chr12	55744912	55746405	Cnpy2	chr12	56309843	56315988	yes
chr12:56135581-56138020	chr12	55741797	55744236	Baz2a	chr12	56595595	56630326	yes
chr12:56096581-56097705	chr12	55702797	55703921	Neurod4	chr12	55019973	55030017	yes
chr22:31687860-31688433	chr22	31291874	31292447	Zmat5	chr22	29730955	29767007	yes
chr22:31680268-31681193	chr22	31284282	31285207	Drg1	chr22	31399603	31434452	yes
chr22:31643296-31645113	chr22	31247310	31249127	Drg1	chr22	31399603	31434452	yes
chr22:31198469-31199531	chr22	30802482	30803544	Drg1	chr22	31399603	31434452	yes
chr22:30772060-30773570	chr22	30376071	30377581	Mtfp1	chr22	30425767	30429054	yes
chr22:30098935-30099857	chr22	29702946	29703868	Tbc1d10a	chr22	30291989	30326941	yes
chr22:29302740-29304797	chr22	28906752	28908809	Emid1	chr22	29205895	29259597	yes
chr7:44325824-44327345	chr7	44286225	44287746	Purb	chr7	44876298	44885530	yes
chr7:44504949-44507303	chr7	44465350	44467704	H2az2	chr7	44826888	44848126	yes
chr7:44794007-44794387	chr7	44754408	44754788	Tmed4	chr7	44577893	44582231	yes
chr7:44920140-44921115	chr7	44880541	44881516	H2az2	chr7	44826888	44848126	yes
chr7:44932136-44943900	chr7	44892537	44904301	Zmiz2	chr7	44748546	44769881	yes
chr7:45009193-45009977	chr7	44969594	44970378	Purb	chr7	44876298	44885530	yes
chr7:45404791-45405331	chr7	45365192	45365732	Tbrg4	chr7	45100099	45111697	yes
chr7:45334498-45335295	chr7	45294899	45295696	Adcy1	chr7	45574139	45664680	yes
chr7:47547354-47548060	chr7	47507756	47508462	Hus1	chr7	47962979	47979619	yes
chr7:50537700-50538647	chr7	50470002	50470949	Fignl1	chr7	50437319	50450336	yes
chr7:50543098-50546312	chr7	50475400	50478614	Fignl1	chr7	50437319	50450336	yes
chr7:54900229-54901277	chr7	54832536	54833584	Eldr	chr7	55238435	55255635	yes
chr7:55070213-55073250	chr7	55002520	55005557	Egfr	chr7	55019016	55156939	yes
chr7:55177344-55178977	chr7	55109651	55111284	Egfr	chr7	55019016	55156939	yes
chr7:55307591-55309141	chr7	55239898	55241448	Egfr	chr7	55019016	55156939	yes
chr2:66657215-66658369	chr2	66430083	66431237	Meis1	chr2	66435124	66573869	yes
chr2:65644116-65645339	chr2	65416982	65418205	Spred2	chr2	65307424	65432341	yes
chr2:64879320-64881772	chr2	64652186	64654638	Sertad2	chr2	64631620	64653913	yes
chr2:64871406-64872564	chr2	64644272	64645430	Sertad2	chr2	64631620	64653913	yes
chr2:64860807-64862246	chr2	64633673	64635112	Sertad2	chr2	64631620	64653913	yes
chr2:64851759-64856624	chr2	64624625	64629490	Sertad2	chr2	64631620	64653913	yes
chr2:64491634-64492197	chr2	64264500	64265063	Vps54	chr2	63892148	64019419	yes
chr2:60795465-60797426	chr2	60568330	60570291	Bcl11a	chr2	60450519	60553654	yes
chr2:60757404-60759010	chr2	60530269	60531875	Bcl11a	chr2	60450519	60553654	yes
chr2:60542810-60545279	chr2	60315675	60318144	Bcl11a	chr2	60450519	60553654	yes
chr2:60524758-60525940	chr2	60297623	60298805	Bcl11a	chr2	60450519	60553654	yes
chr2:60522069-60523295	chr2	60294934	60296160	Bcl11a	chr2	60450519	60553654	yes
chr2:60442066-60442950	chr2	60214931	60215815	Bcl11a	chr2	60450519	60553654	yes
chr2:60440159-60441414	chr2	60213024	60214279	Bcl11a	chr2	60450519	60553654	yes
chr2:60105747-60107639	chr2	59878612	59880504	Bcl11a	chr2	60450519	60553654	yes
chr2:59688919-59690816	chr2	59461784	59463681	Bcl11a	chr2	60450519	60553654	yes
chr2:59476003-59478494	chr2	59248868	59251359	Bcl11a	chr2	60450519	60553654	yes
chr2:59256127-59256560	chr2	59028992	59029425	Bcl11a	chr2	60450519	60553654	yes
chr2:59140134-59142486	chr2	58912999	58915351	Bcl11a	chr2	60450519	60553654	yes
chr2:58999044-58999568	chr2	58771909	58772433	Bcl11a	chr2	60450519	60553654	yes
chr2:58997594-58998276	chr2	58770459	58771141	Bcl11a	chr2	60450519	60553654	yes
chr2:58995145-58996774	chr2	58768010	58769639	Bcl11a	chr2	60450519	60553654	yes
chr2:58147557-58148436	chr2	57920422	57921301	Bcl11a	chr2	60450519	60553654	yes
chr2:54824672-54827849	chr2	54597535	54600712	Cfap36	chr2	55519603	55545079	yes
chr2:54822807-54824086	chr2	54595670	54596949	Cfap36	chr2	55519603	55545079	yes
chr2:54557413-54558537	chr2	54330276	54331400	Cfap36	chr2	55519603	55545079	yes
chr5:173070827-173071598	chr5	173643824	173644595	Bod1	chr5	173607144	173616650	yes
chr5:173279791-173283080	chr5	173852788	173856077	Bod1	chr5	173607144	173616650	yes
chr5:173482654-173483614	chr5	174055651	174056611	Asb3	chr2	53669979	53786953	no
chr5:173494267-173495083	chr5	174067264	174068080	Bod1	chr5	173607144	173616650	yes
chr5:173501971-173502751	chr5	174074968	174075748	Bod1	chr5	173607144	173616650	yes
chr5:173534156-173535089	chr5	174107153	174108086	Bod1	chr5	173607144	173616650	yes
chr5:173569213-173573840	chr5	174142210	174146837	Bod1	chr5	173607144	173616650	yes
chr5:173646415-173653210	chr5	174219412	174226207	Bod1	chr5	173607144	173616650	yes
chr5:171471343-171471712	chr5	172044339	172044708	Fbxw11	chr5	171861548	172006638	yes
chr5:170739595-170740562	chr5	171312591	171313558	Ranbp17	chr5	170862017	171300015	yes
chr5:170003969-170004865	chr5	170576965	170577861	Npm1	chr5	171387115	171410900	yes
chr5:169426523-169427123	chr5	169999519	170000119	Insyn2b	chr5	169861302	169980495	yes
chr5:169374362-169376412	chr5	169947358	169949408	Insyn2b	chr5	169861302	169980495	yes
chr5:168209492-168211639	chr5	168782487	168784634	Spdl1	chr5	169583660	169602373	yes
chr5:167844846-167846154	chr5	168417841	168419149	Pank3	chr5	168548494	168579368	yes
chr5:159894573-159895064	chr5	160467566	160468057	Pttg1	chr5	160421854	160428739	yes
chr5:159714332-159714966	chr5	160287325	160287959	Slu7	chr5	160401640	160419081	yes
chr5:159689171-159690304	chr5	160262164	160263297	Ttc1	chr5	160009138	160065543	yes
chr5:159624149-159625324	chr5	160197142	160198317	Ttc1	chr5	160009138	160065543	yes
chr5:159591158-159591945	chr5	160164151	160164938	Ttc1	chr5	160009138	160065543	yes
chr5:159204444-159204731	chr5	159777437	159777724	Slu7	chr5	160401640	160419081	yes
chr5:158508720-158510055	chr5	159081712	159083047	Clint1	chr5	157785746	157859145	yes
chr5:158488518-158489344	chr5	159061510	159062336	Clint1	chr5	157785746	157859145	yes
chr5:158485764-158486618	chr5	159058756	159059610	Clint1	chr5	157785746	157859145	yes
chr5:158479467-158480638	chr5	159052459	159053630	Clint1	chr5	157785746	157859145	yes
chr5:158404954-158406194	chr5	158977946	158979186	Clint1	chr5	157785746	157859145	yes
chr5:158398494-158401241	chr5	158971486	158974233	Clint1	chr5	157785746	157859145	yes
chr5:158307172-158309568	chr5	158880164	158882560	Clint1	chr5	157785746	157859145	yes
chr5:158239177-158239957	chr5	158812169	158812949	Clint1	chr5	157785746	157859145	yes
chr5:158231750-158232990	chr5	158804742	158805982	Clint1	chr5	157785746	157859145	yes
chr5:158148967-158149381	chr5	158721959	158722373	Clint1	chr5	157785746	157859145	yes
chr5:158103456-158104602	chr5	158676448	158677594	Clint1	chr5	157785746	157859145	yes
chr5:157562220-157563054	chr5	158135212	158136046	Clint1	chr5	157785746	157859145	yes
chr5:156790381-156791854	chr5	157363373	157364846	Thg1l	chr5	157731419	157741449	yes
chr5:180229493-180229954	chr5	180802493	180802954	Rack1	chr5	181236896	181243906	yes
chr5:179602478-179604528	chr5	180175478	180177528	Cnot6	chr5	180494372	180577965	yes
chr5:179599320-179601523	chr5	180172320	180174523	Mrnip	chr5	179837275	179858817	yes
chr5:179596487-179597937	chr5	180169487	180170937	Mrnip	chr5	179837275	179858817	yes
chr5:133256881-133257829	chr5	133921190	133922138	Hnrnpab	chr5	178204532	178211163	yes
chr5:133168942-133169370	chr5	133833251	133833679	Hnrnpab	chr5	178204532	178211163	yes
chr5:132152717-132153019	chr5	132817025	132817327	Rad50	chr5	132556976	132646349	yes
chr5:131647268-131648414	chr5	132311575	132312721	Fnip1	chr5	131641713	131797017	yes
chr5:131602855-131604186	chr5	132267162	132268493	Cdc42se2	chr5	131264052	131394672	yes
chr5:131550809-131551209	chr5	132215116	132215516	Cdc42se2	chr5	131264052	131394672	yes
chr5:131337684-131339589	chr5	132001991	132003896	Cdc42se2	chr5	131264052	131394672	yes
chr5:130659159-130660168	chr5	131323466	131324475	Cdc42se2	chr5	131264052	131394672	yes
chr5:130577693-130578179	chr5	131242000	131242486	Cdc42se2	chr5	131264052	131394672	yes
chr5:150474519-150475397	chr5	151094958	151095836	Gpx3	chr5	151020590	151028988	yes
chr5:150520419-150522908	chr5	151140858	151143347	Gpx3	chr5	151020590	151028988	yes
chr5:150530031-150530912	chr5	151150470	151151351	Cdc42se2	chr5	131264052	131394672	yes
chr5:150974510-150975682	chr5	151594949	151596121	Slc36a1	chr5	151447590	151552258	yes
chr5:152013467-152014578	chr5	152633907	152635018	Fam114a2	chr5	153990147	154038910	yes
chr5:153457858-153458232	chr5	154078298	154078672	Fam114a2	chr5	153990147	154038910	yes
chr5:153487491-153488613	chr5	154107931	154109053	Fam114a2	chr5	153990147	154038910	yes
chr5:153490233-153491588	chr5	154110673	154112028	Fam114a2	chr5	153990147	154038910	yes
chr5:153770235-153770891	chr5	154390675	154391331	Fam114a2	chr5	153990147	154038910	yes
chr17:17472876-17473774	chr17	17569562	17570460	Gid4	chr17	18039407	18057198	yes
chr17:17477359-17478330	chr17	17574045	17575016	Alkbh5	chr17	18183827	18209954	yes
chr17:17572190-17574238	chr17	17668876	17670924	Cops3	chr17	17246615	17281246	yes
chr17:17596477-17599341	chr17	17693163	17696027	Cops3	chr17	17246615	17281246	yes
chr17:17626647-17628756	chr17	17723333	17725442	Cops3	chr17	17246615	17281246	yes
chr17:17684798-17688171	chr17	17781484	17784857	Cops3	chr17	17246615	17281246	yes
chr17:17724449-17727641	chr17	17821135	17824327	Cops3	chr17	17246615	17281246	yes
chr17:17754659-17755100	chr17	17851345	17851786	Cops3	chr17	17246615	17281246	yes
chr17:17823207-17825050	chr17	17919893	17921736	Cops3	chr17	17246615	17281246	yes
chr17:17840246-17842612	chr17	17936932	17939298	Cops3	chr17	17246615	17281246	yes
chr17:17874807-17875719	chr17	17971493	17972405	Cops3	chr17	17246615	17281246	yes
chr17:17907985-17908648	chr17	18004671	18005334	Cops3	chr17	17246615	17281246	yes
chr17:21188083-21188311	chr17	21284771	21284999	B9d1	chr17	19334694	19362723	yes
chr17:19630685-19632992	chr17	19727372	19729679	Rnf112	chr17	19406978	19417276	yes
chr17:19301892-19303363	chr17	19398579	19400050	Map2k3	chr17	21284678	21315240	yes
chr17:15878343-15878789	chr17	15975029	15975475	Specc1	chr17	20009300	20239427	yes
chr17:15879807-15880658	chr17	15976493	15977344	Specc1	chr17	20009300	20239427	yes
chr17:15096884-15098991	chr17	15193567	15195674	Hs3st3b1	chr17	14301080	14349404	yes
chr17:14989557-14990439	chr17	15086240	15087122	Hs3st3b1	chr17	14301080	14349404	yes
chr17:14450710-14451863	chr17	14547393	14548546	Hs3st3b1	chr17	14301080	14349404	yes
chr17:14234298-14235211	chr17	14330981	14331894	Hs3st3b1	chr17	14301080	14349404	yes
chr17:12934050-12934615	chr17	13030733	13031298	Hs3st3b1	chr17	14301080	14349404	yes
chr17:12410395-12410777	chr17	12507078	12507460	Arhgap44	chr17	12789497	12991643	yes
chr17:12375559-12376011	chr17	12472242	12472694	Arhgap44	chr17	12789497	12991643	yes
chr17:9233618-9235669	chr17	9330301	9332352	Myh10	chr17	8474211	8629758	yes
chr17:9139986-9141878	chr17	9236669	9238561	Myh10	chr17	8474211	8629758	yes
chr17:9102868-9104369	chr17	9199551	9201052	Ndel1	chr17	8435883	8468163	yes
chr17:9069388-9071418	chr17	9166071	9168101	Myh10	chr17	8474211	8629758	yes
chr17:8054366-8055991	chr17	8151048	8152673	Trappc1	chr17	7930344	7931999	yes
chr17:7825918-7826485	chr17	7922600	7923167	Chd3	chr17	7884763	7902959	yes
chr17:7744576-7748157	chr17	7841258	7844839	Tmem107	chr17	8172456	8176380	yes
chr17:7738326-7742465	chr17	7835008	7839147	Chd3	chr17	7884763	7902959	yes
chr17:7620141-7621469	chr17	7716823	7718151	Pfas	chr17	8247595	8270491	yes
chr17:7615192-7616096	chr17	7711874	7712778	Pfas	chr17	8247595	8270491	yes
chr17:7444466-7444850	chr17	7541149	7541533	Tmem256	chr17	7402974	7404097	yes
chr17:7307055-7307398	chr17	7403736	7404079	Aurkb	chr17	8204730	8210249	yes
chr17:7107278-7109704	chr17	7203959	7206385	Pfn1	chr17	4945651	4948530	yes
chr17:4779730-4780887	chr17	4876435	4877592	Med11	chr17	4731427	4733607	yes
chr17:5672825-5674336	chr17	5769505	5771016	Wscd1	chr17	6069115	6124427	yes
chr17:6572405-6572798	chr17	6669086	6669479	Tax1bp3	chr17	3662894	3668578	yes
chr17:6580545-6581696	chr17	6677226	6678377	Emc6	chr17	3668811	3669665	yes
chr17:4437479-4438055	chr17	4534184	4534760	Ankfy1	chr17	4163819	4209932	yes
chr17:4299131-4301447	chr17	4395836	4398152	Ncbp3	chr17	3802157	3846246	yes
chr17:3798250-3799450	chr17	3894956	3896156	Slc13a5	chr17	6684718	6713369	yes
chr17:2251154-2251898	chr17	2347860	2348604	Mettl16	chr17	2416048	2511888	yes
chr17:1901070-1902032	chr17	1997776	1998738	Mettl16	chr17	2416048	2511888	yes
chr17:188756-189761	chr17	338965	339970	Rflnb	chr17	439977	445940	yes
chr17:714165-714930	chr17	810925	811690	Ywhae	chr17	1344274	1400222	yes
chr17:745698-747211	chr17	842458	843971	Ywhae	chr17	1344274	1400222	yes
chr17:750736-751365	chr17	847496	848125	Ywhae	chr17	1344274	1400222	yes
chr17:752886-753462	chr17	849646	850222	Ywhae	chr17	1344274	1400222	yes
chr17:950579-951644	chr17	1047339	1048404	Pipox	chr17	29043140	29057216	yes
chr17:980668-984811	chr17	1077428	1081571	Pipox	chr17	29043140	29057216	yes
chr17:1012122-1012932	chr17	1108882	1109692	Pipox	chr17	29043140	29057216	yes
chr17:1026765-1028056	chr17	1123430	1124721	Pipox	chr17	29043140	29057216	yes
chr17:1045491-1047222	chr17	1142283	1144086	Pipox	chr17	29043140	29057216	yes
chr17:1082746-1083624	chr17	1179452	1180330	Pipox	chr17	29043140	29057216	yes
chr17:1152769-1154674	chr17	1249475	1251380	Pipox	chr17	29043140	29057216	yes
chr17:1155389-1157115	chr17	1252095	1253821	Rpl23a	chr17	28719984	28724359	yes
chr17:27922879-27923751	chr17	29595861	29596733	Pipox	chr17	29043140	29057216	yes
chr17:27702885-27703560	chr17	29375867	29376542	Traf4	chr17	28744003	28750956	yes
chr17:27506233-27507480	chr17	29179215	29180462	Pipox	chr17	29043140	29057216	yes
chr17:27478666-27479731	chr17	29151648	29152713	Pipox	chr17	29043140	29057216	yes
chr17:27377046-27378895	chr17	29050028	29051877	Pipox	chr17	29043140	29057216	yes
chr17:27374905-27376232	chr17	29047887	29049214	Pipox	chr17	29043140	29057216	yes
chr17:27363994-27366460	chr17	29036976	29039442	Pipox	chr17	29043140	29057216	yes
chr17:27354389-27355700	chr17	29027371	29028682	Nsrp1	chr17	30116815	30186475	yes
chr17:27294939-27296109	chr17	28967921	28969091	Pipox	chr17	29043140	29057216	yes
chr17:27223926-27224715	chr17	28896908	28897697	Pipox	chr17	29043140	29057216	yes
chr17:27138747-27140944	chr17	28811729	28813926	Pipox	chr17	29043140	29057216	yes
chr17:27071081-27072535	chr17	28744063	28745517	Pipox	chr17	29043140	29057216	yes
chr17:26837948-26838884	chr17	28510930	28511866	Vtn	chr17	28367283	28370307	yes
chr17:26273922-26274512	chr17	27946896	27947486	Ccnq	chrX	153587924	153598161	no
chr17:26225125-26226478	chr17	27898099	27899452	Ccnq	chrX	153587924	153598161	no
chr17:25913623-25914312	chr17	27586597	27587286	Ccnq	chrX	153587924	153598161	no
chr17:25894784-25895892	chr17	27567758	27568866	Ccnq	chrX	153587924	153598161	no
chr17:25884950-25885499	chr17	27557924	27558473	Ccnq	chrX	153587924	153598161	no
chr17:25847418-25848066	chr17	27520392	27521040	Ccnq	chrX	153587924	153598161	no
chr17:25818563-25819445	chr17	27491537	27492419	Ccnq	chrX	153587924	153598161	no
chr17:25783211-25784038	chr17	27456185	27457012	Ccnq	chrX	153587924	153598161	no
chr17:29742881-29743777	chr17	31415863	31416759	Ccnq	chrX	153587924	153598161	no
chr17:29793650-29795126	chr17	31466632	31468108	Ccnq	chrX	153587924	153598161	no
chr17:29814913-29815411	chr17	31487895	31488393	Ccnq	chrX	153587924	153598161	no
chr17:29871192-29871423	chr17	31544173	31544404	Ccnq	chrX	153587924	153598161	no
chr17:29875921-29877093	chr17	31548902	31550074	Ccnq	chrX	153587924	153598161	no
chr17:30004848-30005603	chr17	31677829	31678584	Ccnq	chrX	153587924	153598161	no
chr17:30583119-30584053	chr17	32256100	32257034	Atad5	chr17	30830829	30868412	yes
chr17:30603562-30605341	chr17	32276543	32278322	Atad5	chr17	30830829	30868412	yes
chr17:30607529-30609068	chr17	32280510	32282049	Atad5	chr17	30830829	30868412	yes
chr17:30842157-30843396	chr17	32515139	32516378	Psmd11	chr17	32444509	32483319	yes
chr17:30845733-30847558	chr17	32518715	32520540	Tmem98	chr17	32928152	32944315	yes
chr17:30873160-30874325	chr17	32546142	32547307	Tmem98	chr17	32928152	32944315	yes
chr17:30953447-30955269	chr17	32626429	32628251	Tmem98	chr17	32928152	32944315	yes
chr17:30986471-30988074	chr17	32659453	32661056	Psmd11	chr17	32444509	32483319	yes
chr17:31019279-31021036	chr17	32692261	32694018	Tmem98	chr17	32928152	32944315	yes
chr17:31275608-31276662	chr17	32948590	32949644	Tmem98	chr17	32928152	32944315	yes
chr17:31603212-31603834	chr17	33276194	33276816	Tmem98	chr17	32928152	32944315	yes
chr17:31970954-31971620	chr17	33643935	33644601	Tmem98	chr17	32928152	32944315	yes
chr17:32077588-32078592	chr17	33750569	33751573	Tmem98	chr17	32928152	32944315	yes
chr17:32404147-32405227	chr17	34077128	34078208	Psmd11	chr17	32444509	32483319	yes
chr17:35910370-35911654	chr17	37550268	37551552	Aatf	chr17	36948953	37056871	yes
chr17:35875446-35878073	chr17	37515343	37517970	Aatf	chr17	36948953	37056871	yes
chr17:35588983-35591076	chr17	37232068	37234161	Synrg	chr17	37514806	37609418	yes
chr17:35503090-35504948	chr17	37146166	37148024	Lhx1	chr17	36937474	36944612	yes
chr17:35473260-35475117	chr17	37116326	37118183	Ddx52	chr17	37609738	37643446	yes
chr17:35398149-35403639	chr17	37040851	37046341	Lhx1	chr17	36937474	36944612	yes
chr17:35255862-35257916	chr17	36898599	36900630	Aatf	chr17	36948953	37056871	yes
chr17:35251776-35252690	chr17	36894516	36895430	Dusp14	chr17	37488560	37513501	yes
chr17:35249356-35249854	chr17	36892095	36892593	Dusp14	chr17	37488560	37513501	yes
chr17:35245190-35248897	chr17	36887929	36891636	Aatf	chr17	36948953	37056871	yes
chr17:35241791-35243810	chr17	36884534	36886553	Lhx1	chr17	36937474	36944612	yes
chr17:35236611-35238357	chr17	36879358	36881100	Ddx52	chr17	37609738	37643446	yes
chr17:35232131-35232977	chr17	36874899	36875734	Lhx1	chr17	36937474	36944612	yes
chr17:35225836-35228880	chr17	36868607	36871651	Lhx1	chr17	36937474	36944612	yes
chr17:35170151-35172674	chr17	36812886	36815409	Lhx1	chr17	36937474	36944612	yes
chr17:35165012-35166261	chr17	36807762	36809011	Ddx52	chr17	37609738	37643446	yes
chr17:35061931-35062556	chr17	36705490	36706115	Synrg	chr17	37514806	37609418	yes
chr17:35058056-35061137	chr17	36701613	36704694	Lhx1	chr17	36937474	36944612	yes
chr17:35031910-35032187	chr17	36675475	36675752	Lhx1	chr17	36937474	36944612	yes
chr17:35006761-35007734	chr17	36650312	36651285	Lhx1	chr17	36937474	36944612	yes
chr17:60004477-60005226	chr17	61927116	61927865	Ints2	chr17	61865366	61927639	yes
chr17:57624272-57625248	chr17	59546911	59547887	Prr11	chr17	59155354	59203964	yes
chr17:57590532-57593338	chr17	59513171	59515977	Dhx40	chr17	59565562	59607567	yes
chr17:57515665-57515797	chr17	59438304	59438436	Dhx40	chr17	59565562	59607567	yes
chr17:57463071-57465429	chr17	59385710	59388068	Prr11	chr17	59155354	59203964	yes
chr17:57419130-57419977	chr17	59341769	59342616	Dhx40	chr17	59565562	59607567	yes
chr17:57408249-57410141	chr17	59330888	59332780	Dhx40	chr17	59565562	59607567	yes
chr17:56590531-56591866	chr17	58513170	58514505	Mtmr4	chr17	58489536	58514638	yes
chr17:56329646-56329968	chr17	58252285	58252607	Dynll2	chr17	58083418	58095542	yes
chr17:56326774-56328255	chr17	58249413	58250894	Srsf1	chr17	58000918	58007246	yes
chr17:56017936-56018886	chr17	57940575	57941525	Vezf1	chr17	57971546	57987929	yes
chr17:56011120-56014188	chr17	57933759	57936827	Srsf1	chr17	58000918	58007246	yes
chr17:56003715-56004883	chr17	57926354	57927522	Srsf1	chr17	58000918	58007246	yes
chr17:55992719-55994413	chr17	57915358	57917052	Vezf1	chr17	57971546	57987929	yes
chr17:55952454-55953155	chr17	57875093	57875794	Srsf1	chr17	58000918	58007246	yes
chr17:55888425-55889161	chr17	57811064	57811800	Coil	chr17	56938198	56961050	yes
chr17:55885318-55887537	chr17	57807957	57810176	Coil	chr17	56938198	56961050	yes
chr17:55858415-55861746	chr17	57781054	57784385	Coil	chr17	56938198	56961050	yes
chr17:55837586-55841081	chr17	57760225	57763720	Coil	chr17	56938198	56961050	yes
chr17:55833707-55834741	chr17	57756346	57757380	Coil	chr17	56938198	56961050	yes
chr17:55811161-55812505	chr17	57733800	57735144	Coil	chr17	56938198	56961050	yes
chr17:55801195-55805729	chr17	57723834	57728368	Coil	chr17	56938198	56961050	yes
chr17:55691333-55693194	chr17	57613972	57615833	Coil	chr17	56938198	56961050	yes
chr17:55680232-55688027	chr17	57602871	57610666	Coil	chr17	56938198	56961050	yes
chr17:55675219-55676926	chr17	57597858	57599565	Coil	chr17	56938198	56961050	yes
chr17:55673011-55674365	chr17	57595650	57597004	Coil	chr17	56938198	56961050	yes
chr17:55664878-55666333	chr17	57587517	57588972	Coil	chr17	56938198	56961050	yes
chr17:55662644-55664012	chr17	57585283	57586651	Coil	chr17	56938198	56961050	yes
chr17:55643830-55645059	chr17	57566469	57567698	Coil	chr17	56938198	56961050	yes
chr17:55640829-55641629	chr17	57563468	57564268	Coil	chr17	56938198	56961050	yes
chr17:55621671-55626766	chr17	57544310	57549405	Coil	chr17	56938198	56961050	yes
chr17:55614358-55615924	chr17	57536997	57538563	Coil	chr17	56938198	56961050	yes
chr17:55601940-55606295	chr17	57524579	57528934	Coil	chr17	56938198	56961050	yes
chr17:55596095-55596844	chr17	57518734	57519483	Coil	chr17	56938198	56961050	yes
chr17:55559067-55559953	chr17	57481706	57482592	Coil	chr17	56938198	56961050	yes
chr17:55552038-55556320	chr17	57474677	57478959	Coil	chr17	56938198	56961050	yes
chr17:55541332-55544137	chr17	57463971	57466776	Coil	chr17	56938198	56961050	yes
chr17:55517646-55523049	chr17	57440285	57445688	Coil	chr17	56938198	56961050	yes
chr17:55509653-55510236	chr17	57432292	57432875	Coil	chr17	56938198	56961050	yes
chr17:55506279-55507804	chr17	57428918	57430443	Coil	chr17	56938198	56961050	yes
chr17:55478588-55488945	chr17	57401227	57411584	Coil	chr17	56938198	56961050	yes
chr17:55434257-55434786	chr17	57356896	57357425	Coil	chr17	56938198	56961050	yes
chr17:55418528-55419480	chr17	57341167	57342119	Coil	chr17	56938198	56961050	yes
chr17:55416652-55417281	chr17	57339291	57339920	Coil	chr17	56938198	56961050	yes
chr17:55414202-55415009	chr17	57336841	57337648	Akap1	chr17	57085245	57121344	yes
chr17:55363271-55364869	chr17	57285910	57287508	Coil	chr17	56938198	56961050	yes
chr17:55360256-55361197	chr17	57282895	57283836	Coil	chr17	56938198	56961050	yes
chr17:55348250-55349594	chr17	57270889	57272233	Coil	chr17	56938198	56961050	yes
chr17:55342395-55343462	chr17	57265034	57266101	Coil	chr17	56938198	56961050	yes
chr17:55335386-55335899	chr17	57258025	57258538	Coil	chr17	56938198	56961050	yes
chr17:55212936-55213912	chr17	57135575	57136551	Coil	chr17	56938198	56961050	yes
chr17:53361592-53362125	chr17	55284231	55284764	Stxbp4	chr17	54968727	55164285	yes
chr17:49423560-49424403	chr17	51346199	51347042	Adam12	chr10	126012390	126292706	no
chr17:49012144-49013297	chr17	50934783	50935936	Tob1	chr17	50862222	50866354	yes
chr17:49008652-49008937	chr17	50931291	50931576	Ankrd40	chr17	50693194	50702008	yes
chr17:48996100-48999693	chr17	50918739	50922332	Spag9	chr17	50962173	51046878	yes
chr17:48944232-48945218	chr17	50866871	50867857	Spag9	chr17	50962173	51046878	yes
chr17:48907812-48909120	chr17	50830451	50831759	Ankrd40	chr17	50693194	50702008	yes
chr17:48770871-48773237	chr17	50693510	50695876	Spag9	chr17	50962173	51046878	yes
chr17:48704890-48705806	chr17	50627529	50628445	Spag9	chr17	50962173	51046878	yes
chr17:48697861-48699772	chr17	50620500	50622411	Spag9	chr17	50962173	51046878	yes
chr17:48680842-48682334	chr17	50603481	50604973	Spag9	chr17	50962173	51046878	yes
chr17:48642618-48643502	chr17	50565257	50566141	Spag9	chr17	50962173	51046878	yes
chr17:48406012-48406487	chr17	50328651	50329126	Mrpl10	chr17	47823271	47831541	yes
chr17:48403343-48404501	chr17	50325982	50327140	Ppp1r9b	chr17	50133736	50150677	yes
chr17:47754372-47755380	chr17	49677010	49678018	Sp2	chr17	47896031	47932271	yes
chr17:47675330-47676876	chr17	49597968	49599514	Snf8	chr17	48929315	48944842	yes
chr17:47666327-47668115	chr17	49588965	49590753	Mrpl10	chr17	47823271	47831541	yes
chr17:47662973-47664365	chr17	49585611	49587003	Npepps	chr17	47522932	47623276	yes
chr17:47090424-47094648	chr17	49013062	49017286	Kpnb1	chr17	47649918	47685505	yes
chr17:46388289-46389513	chr17	48310927	48312151	Kpnb1	chr17	47649918	47685505	yes
chr17:46270191-46272193	chr17	48192829	48194831	Igf2bp1	chr17	48997384	49056145	yes
chr17:46256206-46257224	chr17	48178844	48179862	Kpnb1	chr17	47649918	47685505	yes
chr17:46225312-46226046	chr17	48147950	48148684	Igf2bp1	chr17	48997384	49056145	yes
chr17:46087716-46094017	chr17	48010350	48016651	Cbx1	chr17	48070058	48101186	yes
chr17:46080235-46081885	chr17	48002869	48004519	Lrrc59	chr17	50381237	50397523	yes
chr17:46070085-46070976	chr17	47992719	47993610	Cbx1	chr17	48070058	48101186	yes
chr17:46067114-46069674	chr17	47989748	47992308	Kpnb1	chr17	47649918	47685505	yes
chr17:46064500-46066590	chr17	47987134	47989224	Cbx1	chr17	48070058	48101186	yes
chr17:46058615-46060748	chr17	47981249	47983382	Cbx1	chr17	48070058	48101186	yes
chr17:36571549-36572304	chr17	38415306	38416061	Igf2bp1	chr17	48997384	49056145	yes
chr17:36596901-36597943	chr17	38440656	38441698	Kpnb1	chr17	47649918	47685505	yes
chr17:36713555-36715894	chr17	38557319	38559658	Socs7	chr17	38351843	38405593	yes
chr17:36720146-36721041	chr17	38563910	38564805	Ppp1r9b	chr17	50133736	50150677	yes
chr17:37032041-37034255	chr17	38875788	38878002	Mien1	chr17	39728509	39730532	yes
chr17:37040320-37043515	chr17	38884067	38887262	Mien1	chr17	39728509	39730532	yes
chr17:37049763-37050554	chr17	38893510	38894301	Mien1	chr17	39728509	39730532	yes
chr17:37253419-37257336	chr17	39097166	39101083	Mien1	chr17	39728509	39730532	yes
chr17:37767496-37769142	chr17	39611243	39612889	Neurod2	chr17	39603767	39607920	yes
chr17:37773950-37774312	chr17	39617697	39618059	Psmd3	chr17	39980806	39997959	yes
chr17:37808270-37810011	chr17	39652017	39653758	Mien1	chr17	39728509	39730532	yes
chr17:38573564-38574141	chr17	40417312	40417889	Igfbp4	chr17	40443449	40457725	yes
chr17:38607471-38609000	chr17	40451219	40452748	Krt222	chr17	40654664	40665177	yes
chr17:38697775-38699146	chr17	40541523	40542894	Smarce1	chr17	40624961	40647818	yes
chr17:38829387-38829550	chr17	40673135	40673298	Igfbp4	chr17	40443449	40457725	yes
chr17:40020636-40021649	chr17	41864383	41865396	Acly	chr17	41866915	41930542	yes
chr17:40178619-40179955	chr17	42026601	42027937	Nbr1	chr17	43170309	43211688	yes
chr17:40790726-40790854	chr17	42638708	42638836	Ptges3l	chr17	42968102	42980080	yes
chr17:40849655-40852120	chr17	42697637	42700102	Nbr1	chr17	43170309	43211688	yes
chr17:41186184-41187037	chr17	43034167	43035020	Brca1	chr17	43044294	43124115	yes
chr17:41187306-41189901	chr17	43035289	43037884	Brca1	chr17	43044294	43124115	yes
chr17:41192405-41194876	chr17	43040388	43042859	Psmc3ip	chr17	42572309	42577729	yes
chr17:41245036-41246971	chr17	43093019	43094954	Plekhh3	chr17	42667913	42676395	yes
chr17:41516040-41516921	chr17	43438672	43439553	Rdm1	chr17	35918079	35930299	yes
chr17:41520709-41522201	chr17	43443341	43444833	Mpp3	chr17	43800810	43833146	yes
chr17:41733475-41734241	chr17	43656107	43656873	Slc4a1	chr17	44248389	44268135	yes
chr17:41893194-41894755	chr17	43815826	43817387	Hdac5	chr17	44076752	44123357	yes
chr17:42276143-42277020	chr17	44198775	44199652	Rdm1	chr17	35918079	35930299	yes
chr17:42440032-42441121	chr17	44362664	44363753	Rdm1	chr17	35918079	35930299	yes
chr17:42672409-42673478	chr17	44595041	44596110	Nmt1	chr17	45061316	45109016	yes
chr17:42811087-42812019	chr17	44733719	44734651	Adam11	chr17	44758987	44781846	yes
chr17:43057243-43058431	chr17	44979875	44981063	Ccdc43	chr17	44677439	44689776	yes
chr17:43065184-43066065	chr17	44987816	44988697	Gjc1	chr17	44794987	44830811	yes
chr17:44742994-44743683	chr17	46665628	46666317	Gosr2	chr17	46923107	46963827	yes
chr17:44019057-44020370	chr17	45941691	45943004	Kansl1	chr17	46027334	46224903	yes
chr17:60704776-60705930	chr17	62627415	62628569	Taco1	chr17	63600894	63608365	yes
chr17:60947018-60948113	chr17	62869657	62870752	Limd2	chr17	63697805	63701227	yes
chr17:61510949-61513663	chr17	63433588	63436302	Map3k3	chr17	63622208	63693976	yes
chr17:62403404-62404515	chr17	64326044	64327155	Pecam1	chr17	64319414	64390860	yes
chr17:62405036-62406890	chr17	64327676	64329530	Kpna2	chr17	68035734	68046854	yes
chr17:65542846-65545181	chr17	67546730	67549065	Psmd12	chr17	67337915	67363167	yes
chr17:65441706-65442568	chr17	67445590	67446452	Psmd12	chr17	67337915	67363167	yes
chr17:65437437-65438403	chr17	67441321	67442287	Psmd12	chr17	67337915	67363167	yes
chr17:65084624-65086306	chr17	67088508	67090190	Apoh	chr17	66212032	66229415	yes
chr17:64996022-64997580	chr17	66999906	67001464	Apoh	chr17	66212032	66229415	yes
chr17:64973781-64975293	chr17	66977665	66979177	Apoh	chr17	66212032	66229415	yes
chr17:64502646-64504196	chr17	66506528	66508078	Apoh	chr17	66212032	66229415	yes
chr17:63554637-63557723	chr17	65558519	65561605	Axin2	chr17	65528562	65559836	yes
chr17:63550433-63551024	chr17	65554315	65554906	Axin2	chr17	65528562	65559836	yes
chr17:63548081-63548593	chr17	65551963	65552475	Axin2	chr17	65528562	65559836	yes
chr17:63545601-63547180	chr17	65549483	65551062	Axin2	chr17	65528562	65559836	yes
chr17:63541949-63542525	chr17	65545831	65546407	Axin2	chr17	65528562	65559836	yes
chr17:63396818-63400888	chr17	65400700	65404770	Axin2	chr17	65528562	65559836	yes
chr17:63366566-63367619	chr17	65370448	65371501	Axin2	chr17	65528562	65559836	yes
chr17:63360393-63362834	chr17	65364275	65366716	Axin2	chr17	65528562	65559836	yes
chr17:63266809-63267742	chr17	65270691	65271624	Axin2	chr17	65528562	65559836	yes
chr17:63259878-63260578	chr17	65263760	65264460	Axin2	chr17	65528562	65559836	yes
chr17:63255814-63256442	chr17	65259696	65260324	Axin2	chr17	65528562	65559836	yes
chr17:63111777-63112679	chr17	65115659	65116561	Wipi1	chr17	68421280	68450694	yes
chr17:66289926-66290977	chr17	68293785	68294836	Axin2	chr17	65528562	65559836	yes
chr17:69100331-69100591	chr17	71104190	71104450	Sox9	chr17	72121019	72126416	yes
chr17:70004782-70005416	chr17	72008641	72009275	Sox9	chr17	72121019	72126416	yes
chr17:70119000-70121250	chr17	72122859	72125109	Sox9	chr17	72121019	72126416	yes
chr17:70146354-70149269	chr17	72150213	72153128	Sox9	chr17	72121019	72126416	yes
chr17:70154556-70155353	chr17	72158415	72159212	Sox9	chr17	72121019	72126416	yes
chr17:70161102-70162581	chr17	72164961	72166440	Sox9	chr17	72121019	72126416	yes
chr17:70200839-70202317	chr17	72204698	72206176	Sox9	chr17	72121019	72126416	yes
chr17:70217697-70219539	chr17	72221556	72223398	Sox9	chr17	72121019	72126416	yes
chr17:70402264-70404383	chr17	72406123	72408242	Sox9	chr17	72121019	72126416	yes
chr17:70449715-70451524	chr17	72453575	72455384	Slc39a11	chr17	72645948	73084840	yes
chr17:70567586-70569159	chr17	72571447	72573020	Sox9	chr17	72121019	72126416	yes
chr17:70571987-70573484	chr17	72575848	72577345	Sox9	chr17	72121019	72126416	yes
chr17:70577265-70577678	chr17	72581126	72581539	Slc39a11	chr17	72645948	73084840	yes
chr17:70771928-70772458	chr17	72775789	72776319	Sox9	chr17	72121019	72126416	yes
chr17:70843859-70844507	chr17	72847720	72848368	Sox9	chr17	72121019	72126416	yes
chr17:70848969-70851524	chr17	72852830	72855385	Slc39a11	chr17	72645948	73084840	yes
chr17:70904190-70904513	chr17	72908051	72908374	Sox9	chr17	72121019	72126416	yes
chr17:70911543-70913200	chr17	72915404	72917061	Sox9	chr17	72121019	72126416	yes
chr17:70921875-70922001	chr17	72925736	72925862	Sox9	chr17	72121019	72126416	yes
chr17:70946032-70948154	chr17	72949893	72952015	Sox9	chr17	72121019	72126416	yes
chr17:71021210-71026933	chr17	73025071	73030794	Sox9	chr17	72121019	72126416	yes
chr17:71064970-71067424	chr17	73068831	73071285	Slc39a11	chr17	72645948	73084840	yes
chr17:71134846-71137991	chr17	73138707	73141852	Sox9	chr17	72121019	72126416	yes
chr17:71150726-71152559	chr17	73154587	73156420	Sox9	chr17	72121019	72126416	yes
chr17:71258103-71259429	chr17	73261964	73263290	Cdc42ep4	chr17	73283623	73311307	yes
chr17:71339300-71339971	chr17	73343161	73343832	Cdc42ep4	chr17	73283623	73311307	yes
chr17:71478894-71481578	chr17	73482755	73485439	Cdc42ep4	chr17	73283623	73311307	yes
chr17:71609167-71610002	chr17	73613028	73613863	Cdc42ep4	chr17	73283623	73311307	yes
chr17:71640973-71643362	chr17	73644834	73647223	Cdc42ep4	chr17	73283623	73311307	yes
chr17:71799803-71800827	chr17	73803664	73804688	Cdc42ep4	chr17	73283623	73311307	yes
chr17:72011904-72013217	chr17	74015765	74017078	Cdc42ep4	chr17	73283623	73311307	yes
chr17:72067021-72067518	chr17	74070882	74071379	Cdc42ep4	chr17	73283623	73311307	yes
chr17:72076509-72077604	chr17	74080370	74081465	Cdc42ep4	chr17	73283623	73311307	yes
chr17:72113118-72113947	chr17	74116979	74117808	Cdc42ep4	chr17	73283623	73311307	yes
chr17:72199844-72200361	chr17	74203705	74204222	Rpl38	chr17	74203677	74210655	yes
chr17:72210108-72211630	chr17	74213969	74215491	Btbd17	chr17	74356415	74361868	yes
chr17:72217266-72219033	chr17	74221127	74222894	Btbd17	chr17	74356415	74361868	yes
chr17:72447781-72448755	chr17	74451642	74452616	Rpl38	chr17	74203677	74210655	yes
chr17:73263064-73264115	chr17	75266983	75268034	Mrps7	chr17	75261878	75266376	yes
chr17:73452757-73453349	chr17	75456676	75457268	Ubald2	chr17	76265347	76271298	yes
chr17:73470935-73473063	chr17	75474854	75476982	Mrpl38	chr17	75898643	75904884	yes
chr17:73511082-73511609	chr17	75515001	75515528	Srp68	chr17	76038784	76053656	yes
chr17:73758618-73760169	chr17	75762537	75764088	Grb2	chr17	75318075	75405678	yes
chr17:73780906-73781769	chr17	75784825	75785688	Ubald2	chr17	76265347	76271298	yes
chr17:73822007-73823996	chr17	75825926	75827915	Mrps7	chr17	75261878	75266376	yes
chr17:73890246-73893072	chr17	75894165	75896991	Tmem94	chr17	75441158	75500088	yes
chr17:73915323-73916823	chr17	75919242	75920742	Mrps7	chr17	75261878	75266376	yes
chr17:73935862-73937094	chr17	75939781	75941013	Tmem94	chr17	75441158	75500088	yes
chr17:74130993-74132191	chr17	76134912	76136110	Tmem94	chr17	75441158	75500088	yes
chr17:74494121-74494685	chr17	76498039	76498603	Sec14l1	chr17	77088684	77217101	yes
chr17:74519405-74519868	chr17	76523323	76523786	Srsf2	chr17	76734114	76737331	yes
chr17:74536527-74537511	chr17	76540445	76541429	Mettl23	chr17	76726040	76733880	yes
chr17:74539714-74542655	chr17	76543632	76546573	Mettl23	chr17	76726040	76733880	yes
chr17:74679452-74683277	chr17	76683370	76687195	Mettl23	chr17	76726040	76733880	yes
chr17:74704053-74707045	chr17	76707971	76710963	Mettl23	chr17	76726040	76733880	yes
chr17:74866540-74868553	chr17	76870458	76872471	Sec14l1	chr17	77088684	77217101	yes
chr17:75369420-75370941	chr17	77373338	77374859	Mettl23	chr17	76726040	76733880	yes
chr17:75372151-75373041	chr17	77376069	77376959	Syngr2	chr17	78168544	78172964	yes
chr17:75390012-75391067	chr17	77393930	77394985	Mettl23	chr17	76726040	76733880	yes
chr17:75427937-75430716	chr17	77431855	77434634	Syngr2	chr17	78168544	78172964	yes
chr17:75446662-75448981	chr17	77450580	77452899	Mettl23	chr17	76726040	76733880	yes
chr17:75562048-75563236	chr17	77565966	77567154	Mettl23	chr17	76726040	76733880	yes
chr17:75566760-75570539	chr17	77570678	77574457	Mettl23	chr17	76726040	76733880	yes
chr17:75633532-75634414	chr17	77637450	77638332	Mettl23	chr17	76726040	76733880	yes
chr17:75717458-75718093	chr17	77721376	77722011	Mettl23	chr17	76726040	76733880	yes
chr17:75722271-75724215	chr17	77726189	77728133	Mettl23	chr17	76726040	76733880	yes
chr17:75730234-75731228	chr17	77734152	77735146	Mettl23	chr17	76726040	76733880	yes
chr17:75742584-75743334	chr17	77746502	77747252	Mettl23	chr17	76726040	76733880	yes
chr17:75752282-75754191	chr17	77756200	77758109	Mettl23	chr17	76726040	76733880	yes
chr17:75797924-75799641	chr17	77801842	77803559	Mettl23	chr17	76726040	76733880	yes
chr17:75879868-75880665	chr17	77883786	77884583	Srsf2	chr17	76734114	76737331	yes
chr17:75912027-75912464	chr17	77915945	77916382	Mettl23	chr17	76726040	76733880	yes
chr17:75919658-75921637	chr17	77923576	77925555	Mettl23	chr17	76726040	76733880	yes
chr17:76255210-76255474	chr17	78259129	78259393	Cyth1	chr17	78674047	78782273	yes
chr17:76360491-76363453	chr17	78364410	78367372	Cant1	chr17	78991715	79005422	yes
chr17:76602928-76604017	chr17	78606846	78607935	Cant1	chr17	78991715	79005422	yes
chr17:76711803-76714036	chr17	78715721	78717954	Cant1	chr17	78991715	79005422	yes
chr17:76718327-76720658	chr17	78722245	78724576	Cant1	chr17	78991715	79005422	yes
chr17:76763795-76764221	chr17	78767713	78768139	Cant1	chr17	78991715	79005422	yes
chr17:76879349-76880687	chr17	78883267	78884605	Cyth1	chr17	78674047	78782273	yes
chr17:76926104-76926296	chr17	78930022	78930214	Cyth1	chr17	78674047	78782273	yes
chr17:77032798-77034600	chr17	79036716	79038518	Cant1	chr17	78991715	79005422	yes
chr17:77075174-77076596	chr17	79079092	79080514	Engase	chr17	79074811	79083860	yes
chr17:77388076-77390906	chr17	79391994	79394824	Engase	chr17	79074811	79083860	yes
chr17:77398212-77402117	chr17	79402130	79406035	Cant1	chr17	78991715	79005422	yes
chr17:77410080-77411107	chr17	79413998	79415025	Socs3	chr17	78356777	78359667	yes
chr17:77417153-77424338	chr17	79421071	79428256	Engase	chr17	79074811	79083860	yes
chr17:77460036-77463606	chr17	79463954	79467524	Cant1	chr17	78991715	79005422	yes
chr17_gl000204_random:63733-64904	chr17	79617783	79618954	Cant1	chr17	78991715	79005422	yes
chr17:77680012-77681842	chr17	79706203	79708033	Cant1	chr17	78991715	79005422	yes
chr17:78407152-78412377	chr17	80433352	80438577	Eif4a3	chr17	80134368	80147128	yes
chr17:78415068-78419720	chr17	80441268	80445920	Eif4a3	chr17	80134368	80147128	yes
chr17:78587008-78587172	chr17	80613208	80613372	Eif4a3	chr17	80134368	80147128	yes
chr17:78741494-78743661	chr17	80767694	80769861	Eif4a3	chr17	80134368	80147128	yes
chr17:78755395-78755678	chr17	80781595	80781878	Tepsin	chr17	81228276	81239040	yes
chr17:78774147-78776654	chr17	80800347	80802854	Eif4a3	chr17	80134368	80147128	yes
chr17:78802143-78802368	chr17	80828343	80828568	Eif4a3	chr17	80134368	80147128	yes
chr17:78806445-78807321	chr17	80832645	80833521	Eif4a3	chr17	80134368	80147128	yes
chr17:78834721-78835180	chr17	80860921	80861380	Aatk	chr17	81117294	81166221	yes
chr17:78857107-78857778	chr17	80883307	80883978	Aatk	chr17	81117294	81166221	yes
chr17:79061003-79061637	chr17	81087203	81087837	Slc38a10	chr17	81244810	81295307	yes
chr17:79067370-79069826	chr17	81093570	81096026	Aatk	chr17	81117294	81166221	yes
chr17:79144421-79145198	chr17	81170621	81171398	Aatk	chr17	81117294	81166221	yes
chr17:79195866-79196765	chr17	81222066	81222965	Eif4a3	chr17	80134368	80147128	yes
chr17:79239346-79239511	chr17	81265546	81265711	Aatk	chr17	81117294	81166221	yes
chr17:79267086-79269064	chr17	81293286	81295264	Eif4a3	chr17	80134368	80147128	yes
chr17:79346478-79348733	chr17	81372678	81374933	Eif4a3	chr17	80134368	80147128	yes
chr17:79358794-79361511	chr17	81384994	81387711	Eif4a3	chr17	80134368	80147128	yes
chr17:79448144-79449251	chr17	81481118	81482225	Eif4a3	chr17	80134368	80147128	yes
chr17:79460498-79460919	chr17	81493472	81493893	Bahcc1	chr17	81395430	81466326	yes
chr17:80698516-80698861	chr17	82740640	82740985	Alyref	chr17	81887834	81891586	yes
chr17:81153902-81153936	chr17	83206133	83206167	Mafg	chr17	81918269	81923466	yes
chr2:26199034-26200733	chr2	25976165	25977864	Dnmt3a	chr2	25227873	25341925	yes
chr2:25623942-25625344	chr2	25401073	25402475	Rab10	chr2	26034083	26137454	yes
chr2:25301386-25304948	chr2	25078517	25082079	Ncoa1	chr2	24491253	24770702	yes
chr2:25299344-25300556	chr2	25076475	25077687	Rab10	chr2	26034083	26137454	yes
chr2:24658286-24659248	chr2	24435417	24436379	Dnmt3a	chr2	25227873	25341925	yes
chr2:23810774-23811565	chr2	23587904	23588695	Apob	chr2	21001428	21044073	yes
chr2:23738999-23740610	chr2	23516129	23517740	Rhob	chr2	20447073	20449440	yes
chr2:23724631-23726172	chr2	23501761	23503302	Ldah	chr2	20682488	20823139	yes
chr2:23557019-23557897	chr2	23334148	23335026	Rhob	chr2	20447073	20449440	yes
chr2:23288637-23289130	chr2	23065766	23066259	Ldah	chr2	20682488	20823139	yes
chr2:20834990-20835706	chr2	20635230	20635946	Apob	chr2	21001428	21044073	yes
chr2:20820475-20822008	chr2	20620715	20622248	Ldah	chr2	20682488	20823139	yes
chr2:20799777-20800524	chr2	20600017	20600764	Apob	chr2	21001428	21044073	yes
chr2:20249818-20252119	chr2	20050057	20052358	Sdc1	chr2	20200796	20207466	yes
chr2:16846868-16847088	chr2	16665600	16665820	Gen1	chr2	17753686	17784719	yes
chr2:16820780-16822060	chr2	16639512	16640792	Vsnl1	chr2	17539971	17657018	yes
chr2:16796817-16797680	chr2	16615549	16616412	Smc6	chr2	17663811	17746204	yes
chr2:16472918-16475225	chr2	16291650	16293957	Mycn	chr2	15940549	15947004	yes
chr2:16403452-16405419	chr2	16222184	16224151	Ddx1	chr2	15591867	15631101	yes
chr2:16398056-16398868	chr2	16216788	16217600	Nbas	chr2	14998066	15561344	yes
chr2:16385699-16386879	chr2	16204431	16205611	Ddx1	chr2	15591867	15631101	yes
chr2:16361337-16361761	chr2	16180069	16180493	Mycn	chr2	15940549	15947004	yes
chr2:16349116-16350672	chr2	16167848	16169404	Ddx1	chr2	15591867	15631101	yes
chr2:16347052-16348327	chr2	16165784	16167059	Ddx1	chr2	15591867	15631101	yes
chr2:16209696-16211163	chr2	16069574	16071041	Mycn	chr2	15940549	15947004	yes
chr2:16207464-16209292	chr2	16067342	16069170	Ddx1	chr2	15591867	15631101	yes
chr2:16191988-16192423	chr2	16051866	16052301	Mycn	chr2	15940549	15947004	yes
chr2:16190769-16191379	chr2	16050647	16051257	Ddx1	chr2	15591867	15631101	yes
chr2:16152849-16155057	chr2	16012727	16014935	Ddx1	chr2	15591867	15631101	yes
chr2:16122683-16125657	chr2	15982561	15985535	Ddx1	chr2	15591867	15631101	yes
chr2:15830065-15831117	chr2	15689941	15690993	Nbas	chr2	14998066	15561344	yes
chr2:11622059-11623906	chr2	11481933	11483780	E2f6	chr2	11444374	11466161	yes
chr2:11194008-11194518	chr2	11053882	11054392	E2f6	chr2	11444374	11466161	yes
chr2:9066055-9067238	chr2	8925925	8927109	Rrm2	chr2	10122567	10131419	yes
chr2:8781359-8783354	chr2	8641229	8643224	Rrm2	chr2	10122567	10131419	yes
chr2:7906315-7910394	chr2	7766184	7770263	Klf11	chr2	10043549	10054836	yes
chr2:7810471-7812648	chr2	7670340	7672517	Klf11	chr2	10043549	10054836	yes
chr2:7805641-7807669	chr2	7665510	7667538	Klf11	chr2	10043549	10054836	yes
chr2:7663355-7664472	chr2	7523224	7524341	Klf11	chr2	10043549	10054836	yes
chr2:7570572-7571947	chr2	7430441	7431816	Klf11	chr2	10043549	10054836	yes
chr2:7517992-7519687	chr2	7377861	7379556	Klf11	chr2	10043549	10054836	yes
chr2:7511410-7517790	chr2	7371279	7377659	Klf11	chr2	10043549	10054836	yes
chr2:7404812-7405891	chr2	7264681	7265760	Klf11	chr2	10043549	10054836	yes
chr2:6779218-6781323	chr2	6639086	6641191	Sox11	chr2	5692383	5701385	yes
chr2:6777032-6778561	chr2	6636900	6638429	Sox11	chr2	5692383	5701385	yes
chr2:6465341-6466573	chr2	6325209	6326441	Sox11	chr2	5692383	5701385	yes
chr2:6449206-6452109	chr2	6309074	6311977	Sox11	chr2	5692383	5701385	yes
chr2:6430239-6431936	chr2	6290107	6291804	Sox11	chr2	5692383	5701385	yes
chr2:6372642-6374815	chr2	6232510	6234683	Sox11	chr2	5692383	5701385	yes
chr2:6272390-6273262	chr2	6132258	6133130	Sox11	chr2	5692383	5701385	yes
chr2:6208510-6215060	chr2	6068378	6074928	Sox11	chr2	5692383	5701385	yes
chr2:6192828-6196477	chr2	6052696	6056345	Sox11	chr2	5692383	5701385	yes
chr2:6117789-6123275	chr2	5977657	5983143	Sox11	chr2	5692383	5701385	yes
chr2:6116393-6117136	chr2	5976261	5977004	Sox11	chr2	5692383	5701385	yes
chr2:6085848-6087437	chr2	5945716	5947305	Sox11	chr2	5692383	5701385	yes
chr2:6054732-6055901	chr2	5914600	5915769	Sox11	chr2	5692383	5701385	yes
chr2:5906541-5907209	chr2	5766409	5767077	Sox11	chr2	5692383	5701385	yes
chr2:5813370-5813963	chr2	5673238	5673831	Sox11	chr2	5692383	5701385	yes
chr2:5586222-5586943	chr2	5446090	5446811	Sox11	chr2	5692383	5701385	yes
chr2:5548201-5552516	chr2	5408068	5412383	Sox11	chr2	5692383	5701385	yes
chr2:5542932-5544972	chr2	5402799	5404839	Sox11	chr2	5692383	5701385	yes
chr2:4887975-4889820	chr2	4840385	4842230	Sox11	chr2	5692383	5701385	yes
chr2:3286107-3286950	chr2	3282336	3283179	Rps7	chr2	3575259	3580920	yes
chr2:3268757-3271692	chr2	3264986	3267921	Rps7	chr2	3575259	3580920	yes
chr2:3215658-3216583	chr2	3211887	3212812	Rps7	chr2	3575259	3580920	yes
chr2:3079964-3081501	chr2	3076192	3077729	Eipr1	chr2	3188967	3282826	yes
chr2:2893546-2894480	chr2	2889774	2890708	Eipr1	chr2	3188967	3282826	yes
chr2:2880274-2881864	chr2	2876502	2878092	Rps7	chr2	3575259	3580920	yes
chr2:2837360-2838662	chr2	2833588	2834890	Rps7	chr2	3575259	3580920	yes
chr2:2710820-2711747	chr2	2707048	2707975	Rps7	chr2	3575259	3580920	yes
chr2:2705028-2705427	chr2	2701256	2701655	Eipr1	chr2	3188967	3282826	yes
chr2:2660215-2661336	chr2	2656443	2657564	Rps7	chr2	3575259	3580920	yes
chr2:2533357-2534231	chr2	2529585	2530459	Rnaseh1	chr2	3531812	3558333	yes
chr2:2523509-2524874	chr2	2519737	2521102	Rps7	chr2	3575259	3580920	yes
chr2:2509723-2511658	chr2	2505951	2507886	Rps7	chr2	3575259	3580920	yes
chr2:2327827-2329020	chr2	2324055	2325248	Rps7	chr2	3575259	3580920	yes
chr2:2190777-2191871	chr2	2187005	2188099	Rps7	chr2	3575259	3580920	yes
chr2:2179029-2180232	chr2	2175257	2176460	Rps7	chr2	3575259	3580920	yes
chr2:2177206-2178009	chr2	2173434	2174237	Rps7	chr2	3575259	3580920	yes
chr2:2160716-2162725	chr2	2156944	2158953	Rps7	chr2	3575259	3580920	yes
chr2:2149162-2151885	chr2	2145390	2148113	Rps7	chr2	3575259	3580920	yes
chr2:2104768-2107133	chr2	2100996	2103361	Rps7	chr2	3575259	3580920	yes
chr2:2102040-2103488	chr2	2098268	2099716	Rps7	chr2	3575259	3580920	yes
chr2:1939212-1941746	chr2	1935440	1937974	Rps7	chr2	3575259	3580920	yes
chr2:1871302-1872726	chr2	1867530	1868954	Rps7	chr2	3575259	3580920	yes
chr7:106873266-106876697	chr7	107232821	107236252	Gpr22	chr7	107470056	107475684	yes
chr7:106864838-106865546	chr7	107224393	107225101	Gpr22	chr7	107470056	107475684	yes
chr7:106862266-106863113	chr7	107221821	107222668	Hbp1	chr7	107168986	107200301	yes
chr7:105641430-105641982	chr7	106000984	106001536	Polr1f	chr7	19695460	19709037	yes
chr7:105631019-105631728	chr7	105990573	105991282	Polr1f	chr7	19695460	19709037	yes
chr7:105573265-105574342	chr7	105932819	105933896	Polr1f	chr7	19695460	19709037	yes
chr7:16842763-16843931	chr7	16803139	16804307	Tspan13	chr7	16753754	16784536	yes
chr7:111783919-111785003	chr7	112143864	112144948	Dock4	chr7	111726109	112205592	yes
chr14:32420173-32420494	chr14	31950967	31951288	G2e3	chr14	30559135	30619510	yes
chr14:32694227-32694841	chr14	32225021	32225635	Scfd1	chr14	30622253	30735828	yes
chr14:32769268-32770939	chr14	32300062	32301733	G2e3	chr14	30559135	30619510	yes
chr14:32872574-32873552	chr14	32403368	32404346	G2e3	chr14	30559135	30619510	yes
chr14:32874517-32879919	chr14	32405311	32410713	Hectd1	chr14	31100116	31207483	yes
chr14:32897080-32897766	chr14	32427874	32428560	Ap4s1	chr14	31025105	31096450	yes
chr14:32938209-32938458	chr14	32469003	32469252	Nubpl	chr14	31561398	31683035	yes
chr14:32939866-32943750	chr14	32470660	32474544	Nubpl	chr14	31561398	31683035	yes
chr14:33171713-33172517	chr14	32702507	32703311	Sptssa	chr14	34432787	34462240	yes
chr14:33193531-33195982	chr14	32724325	32726776	Sptssa	chr14	34432787	34462240	yes
chr14:33197008-33198191	chr14	32727802	32728985	Sptssa	chr14	34432787	34462240	yes
chr14:33203669-33204141	chr14	32734463	32734935	Sptssa	chr14	34432787	34462240	yes
chr14:33777002-33777860	chr14	33307796	33308654	Sptssa	chr14	34432787	34462240	yes
chr14:34176845-34177165	chr14	33707639	33707959	Sptssa	chr14	34432787	34462240	yes
chr14:34233877-34235073	chr14	33764671	33765867	Sptssa	chr14	34432787	34462240	yes
chr14:34251673-34253081	chr14	33782467	33783875	Sptssa	chr14	34432787	34462240	yes
chr14:34406705-34408901	chr14	33937499	33939695	Sptssa	chr14	34432787	34462240	yes
chr14:34414670-34415804	chr14	33945464	33946598	Sptssa	chr14	34432787	34462240	yes
chr14:34419845-34420193	chr14	33950639	33950987	Sptssa	chr14	34432787	34462240	yes
chr14:34504618-34506881	chr14	34035412	34037675	Sptssa	chr14	34432787	34462240	yes
chr14:34528918-34529753	chr14	34059712	34060547	Sptssa	chr14	34432787	34462240	yes
chr14:35810363-35811592	chr14	35341157	35342386	Psma6	chr14	35278557	35317479	yes
chr14:35831433-35834864	chr14	35362227	35365658	Nfkbia	chr14	35401512	35404749	yes
chr14:49516010-49517488	chr14	49049292	49050770	Mdga2	chr14	46836517	47343234	yes
chr14:49688257-49689178	chr14	49221539	49222460	Mdga2	chr14	46836517	47343234	yes
chr14:50412425-50413141	chr14	49945707	49946423	Trim9	chr14	50975260	51105158	yes
chr14:50494587-50495691	chr14	50027869	50028973	Rpl36al	chr14	49618529	49620626	yes
chr14:51250104-51250865	chr14	50783386	50784147	Sav1	chr14	50633103	50668292	yes
chr14:51605558-51606487	chr14	51138840	51139769	Sav1	chr14	50633103	50668292	yes
chr14:58875216-58876145	chr14	58408498	58409427	Dact1	chr14	58634060	58648321	yes
chr14:59282169-59283401	chr14	58815451	58816683	Dact1	chr14	58634060	58648321	yes
chr14:60095758-60097253	chr14	59629040	59630535	Pcnx4	chr14	60091910	60134814	yes
chr14:60241318-60241739	chr14	59774600	59775021	Ppm1a	chr14	60245749	60299087	yes
chr14:60280829-60282986	chr14	59814111	59816268	Pcnx4	chr14	60091910	60134814	yes
chr14:60293515-60296093	chr14	59826797	59829375	Pcnx4	chr14	60091910	60134814	yes
chr14:61895738-61896345	chr14	61429020	61429627	Hif1a	chr14	61695512	61748258	yes
chr14:64400205-64401392	chr14	63933487	63934674	Syne2	chr14	63761903	64226433	yes
chr14:64663104-64663977	chr14	64196386	64197259	Syne2	chr14	63761903	64226433	yes
chr14:64859132-64862171	chr14	64392414	64395453	Akap5	chr14	64465498	64474503	yes
chr14:65642785-65644224	chr14	65176067	65177506	Fut8	chr14	65410591	65744121	yes
chr14:66233480-66239138	chr14	65766762	65772420	Fut8	chr14	65410591	65744121	yes
chr14:66246912-66248024	chr14	65780194	65781306	Fut8	chr14	65410591	65744121	yes
chr14:66256180-66257603	chr14	65789462	65790885	Fut8	chr14	65410591	65744121	yes
chr14:66327490-66328868	chr14	65860772	65862150	Fut8	chr14	65410591	65744121	yes
chr14:66429257-66430131	chr14	65962539	65963413	Fut8	chr14	65410591	65744121	yes
chr14:66488666-66489734	chr14	66021948	66023016	Fut8	chr14	65410591	65744121	yes
chr14:66870684-66872412	chr14	66403966	66405694	Tmem229b	chr14	67470268	67515215	yes
chr14:67927957-67928736	chr14	67461240	67462019	Tmem229b	chr14	67470268	67515215	yes
chr14:68161694-68162247	chr14	67694977	67695530	Zfp36l1	chr14	68787654	68796243	yes
chr14:68609454-68611113	chr14	68142737	68144396	Rdh11	chr14	67676799	67695764	yes
chr14:68831013-68832258	chr14	68364296	68365541	Zfp36l1	chr14	68787654	68796243	yes
chr14:68843622-68845073	chr14	68376905	68378356	Rdh11	chr14	67676799	67695764	yes
chr14:68937710-68938874	chr14	68470993	68472157	Zfp36l1	chr14	68787654	68796243	yes
chr14:69005480-69006884	chr14	68538763	68540167	Zfp36l1	chr14	68787654	68796243	yes
chr14:69035379-69036867	chr14	68568662	68570150	Zfp36l1	chr14	68787654	68796243	yes
chr14:69051148-69054263	chr14	68584431	68587546	Zfp36l1	chr14	68787654	68796243	yes
chr14:69099017-69100858	chr14	68632300	68634141	Zfp36l1	chr14	68787654	68796243	yes
chr14:69121844-69122832	chr14	68655127	68656115	Rdh11	chr14	67676799	67695764	yes
chr14:69137057-69137498	chr14	68670340	68670781	Rdh11	chr14	67676799	67695764	yes
chr14:69148932-69150411	chr14	68682215	68683694	Zfp36l1	chr14	68787654	68796243	yes
chr14:69157485-69157952	chr14	68690768	68691235	Zfp36l1	chr14	68787654	68796243	yes
chr14:69196537-69200499	chr14	68729820	68733782	Zfp36l1	chr14	68787654	68796243	yes
chr14:69281482-69281888	chr14	68814765	68815171	Zfp36l1	chr14	68787654	68796243	yes
chr14:69367366-69368400	chr14	68900649	68901683	Plekhd1	chr14	69467743	69531551	yes
chr14:69716537-69717245	chr14	69249820	69250528	Plekhd1	chr14	69467743	69531551	yes
chr14:70010098-70011433	chr14	69543381	69544716	Erh	chr14	69380127	69398299	yes
chr14:70099031-70099860	chr14	69632314	69633143	Susd6	chr14	69611595	69715144	yes
chr14:70102857-70115030	chr14	69636140	69648313	Susd6	chr14	69611595	69715144	yes
chr14:70376556-70378539	chr14	69909839	69911822	Cox16	chr14	70325080	70359683	yes
chr14:70422403-70423926	chr14	69955686	69957209	Cox16	chr14	70325080	70359683	yes
chr14:70453550-70454875	chr14	69986833	69988158	Cox16	chr14	70325080	70359683	yes
chr14:70475294-70476753	chr14	70008577	70010036	Cox16	chr14	70325080	70359683	yes
chr14:72736774-72737681	chr14	72270066	72270973	Dpf3	chr14	72609033	72894101	yes
chr14:73728239-73729457	chr14	73261531	73262749	Ptgr2	chr14	73851830	73863562	yes
chr14:73738657-73739671	chr14	73271949	73272963	Ptgr2	chr14	73851830	73863562	yes
chr14:73957658-73958600	chr14	73490953	73491896	Riox1	chr14	73490932	73493394	yes
chr14:74180553-74181514	chr14	73713850	73714811	Riox1	chr14	73490932	73493394	yes
chr14:74208105-74209217	chr14	73741402	73742514	Riox1	chr14	73490932	73493394	yes
chr14:75003657-75006723	chr14	74536954	74540020	Acyp1	chr14	75053242	75064024	yes
chr14:75447611-75447971	chr14	74980908	74981268	Eif2b2	chr14	75002920	75012366	yes
chr14:75704445-75704862	chr14	75237742	75238159	Fos	chr14	75278827	75282230	yes
chr14:76476668-76478499	chr14	76010325	76012156	Ift43	chr14	75985762	76059271	yes
chr14:76550435-76551386	chr14	76084092	76085043	Ift43	chr14	75985762	76059271	yes
chr14:76571303-76571968	chr14	76104960	76105625	Ttll5	chr14	75661245	75955079	yes
chr14:76604994-76605767	chr14	76138651	76139424	Ift43	chr14	75985762	76059271	yes
chr14:76800960-76801007	chr14	76334617	76334664	Ift43	chr14	75985762	76059271	yes
chr14:77180504-77182962	chr14	76714161	76716619	Gpatch2l	chr14	76151911	76201201	yes
chr14:77191857-77194542	chr14	76725514	76728199	Ift43	chr14	75985762	76059271	yes
chr14:77250482-77254601	chr14	76784139	76788258	Ttll5	chr14	75661245	75955079	yes
chr14:77367402-77368017	chr14	76901059	76901674	Ahsa1	chr14	77457866	77469472	yes
chr14:77383672-77384125	chr14	76917329	76917782	Ahsa1	chr14	77457866	77469472	yes
chr14:77384517-77386955	chr14	76918174	76920612	Ahsa1	chr14	77457866	77469472	yes
chr14:77390830-77393878	chr14	76924487	76927535	Ahsa1	chr14	77457866	77469472	yes
chr14:77401407-77404954	chr14	76935064	76938611	Ahsa1	chr14	77457866	77469472	yes
chr14:77413434-77414646	chr14	76947091	76948303	Ahsa1	chr14	77457866	77469472	yes
chr14:77503083-77510847	chr14	77036740	77044504	Ahsa1	chr14	77457866	77469472	yes
chr14:77524647-77525395	chr14	77058304	77059052	Ahsa1	chr14	77457866	77469472	yes
chr14:77576282-77577745	chr14	77109939	77111402	Cipc	chr14	77098257	77117287	yes
chr14:86043819-86045546	chr14	85577475	85579202	Flrt2	chr14	85527371	85628696	yes
chr14:88044660-88046666	chr14	87578316	87580322	Galc	chr14	87933013	87992887	yes
chr14:88135415-88136182	chr14	87669071	87669838	Kcnk10	chr14	88180107	88255460	yes
chr14:88687731-88689334	chr14	88221387	88222990	Kcnk10	chr14	88180107	88255460	yes
chr14:88713427-88713841	chr14	88247083	88247497	Kcnk10	chr14	88180107	88255460	yes
chr14:88772397-88778933	chr14	88306053	88312589	Kcnk10	chr14	88180107	88255460	yes
chr14:88788167-88790635	chr14	88321823	88324291	Kcnk10	chr14	88180107	88255460	yes
chr14:89393544-89398269	chr14	88927200	88931925	Eml5	chr14	88612147	88792552	yes
chr14:89657015-89657438	chr14	89190671	89191094	Eml5	chr14	88612147	88792552	yes
chr14:89658216-89659883	chr14	89191872	89193539	Tdp1	chr14	89954922	90044224	yes
chr14:89697789-89698610	chr14	89231445	89232266	Foxn3	chr14	89156176	89417233	yes
chr14:89737965-89740673	chr14	89271621	89274329	Zc3h14	chr14	88562981	88611888	yes
chr14:89769963-89772293	chr14	89303619	89305949	Zc3h14	chr14	88562981	88611888	yes
chr14:89803736-89804446	chr14	89337392	89338102	Eml5	chr14	88612147	88792552	yes
chr14:89811388-89812597	chr14	89345044	89346253	Foxn3	chr14	89156176	89417233	yes
chr14:89816007-89816283	chr14	89349663	89349939	Eml5	chr14	88612147	88792552	yes
chr14:90187049-90188144	chr14	89720705	89721800	Tdp1	chr14	89954922	90044224	yes
chr14:90258379-90260116	chr14	89792035	89793772	Foxn3	chr14	89156176	89417233	yes
chr14:90738671-90739040	chr14	90272327	90272696	Calm1	chr14	90396501	90408268	yes
chr14:90812257-90812660	chr14	90345913	90346316	Ccdc88c	chr14	91271322	91417546	yes
chr14:90906185-90906984	chr14	90439841	90440640	Ccdc88c	chr14	91271322	91417546	yes
chr14:90971188-90973193	chr14	90504844	90506849	Ccdc88c	chr14	91271322	91417546	yes
chr14:90979447-90980856	chr14	90513103	90514512	Ccdc88c	chr14	91271322	91417546	yes
chr14:91018225-91018937	chr14	90551881	90552593	Ccdc88c	chr14	91271322	91417546	yes
chr14:91024626-91026455	chr14	90558282	90560111	Ccdc88c	chr14	91271322	91417546	yes
chr14:91129957-91130103	chr14	90663613	90663759	Ccdc88c	chr14	91271322	91417546	yes
chr14:91490468-91493929	chr14	91024124	91027585	Calm1	chr14	90396501	90408268	yes
chr14:91577396-91580965	chr14	91111052	91114621	Ccdc88c	chr14	91271322	91417546	yes
chr14:92704781-92719506	chr14	92238437	92253162	Cpsf2	chr14	92121968	92172145	yes
chr14:93006232-93007631	chr14	92539888	92541286	Lgmn	chr14	92703808	92748627	yes
chr14:93015944-93016418	chr14	92549599	92550073	Lgmn	chr14	92703808	92748627	yes
chr14:93502118-93503545	chr14	93035773	93037200	Ubr7	chr14	93207255	93229215	yes
chr14:93529300-93531557	chr14	93062955	93065212	Tmem251	chr14	93184973	93188463	yes
chr14:93573717-93574790	chr14	93107372	93108445	Ubr7	chr14	93207255	93229215	yes
chr14:93616049-93618361	chr14	93149704	93152016	Ubr7	chr14	93207255	93229215	yes
chr14:94046612-94046760	chr14	93580266	93580414	Btbd7	chr14	93237549	93333036	yes
chr14:94150767-94152808	chr14	93684421	93686462	Btbd7	chr14	93237549	93333036	yes
chr14:94492758-94493260	chr14	94026412	94026914	Btbd7	chr14	93237549	93333036	yes
chr14:94546624-94547360	chr14	94080278	94081014	Btbd7	chr14	93237549	93333036	yes
chr14:97355309-97357039	chr14	96888972	96890702	Vrk1	chr14	96797381	96881609	yes
chr14:97490897-97492974	chr14	97024560	97026637	Bcl11b	chr14	99169286	99272197	yes
chr14:97879141-97879897	chr14	97412804	97413560	Vrk1	chr14	96797381	96881609	yes
chr14:98878755-98879606	chr14	98412418	98413269	Bcl11b	chr14	99169286	99272197	yes
chr14:99702547-99703144	chr14	99236210	99236807	Bcl11b	chr14	99169286	99272197	yes
chr14:99711767-99713664	chr14	99245430	99247327	Bcl11b	chr14	99169286	99272197	yes
chr14:99879607-99880872	chr14	99413270	99414535	Vrk1	chr14	96797381	96881609	yes
chr14:100129273-100134502	chr14	99662936	99668165	Eml1	chr14	99737721	99942060	yes
chr14:100224245-100225499	chr14	99757908	99759162	Eml1	chr14	99737721	99942060	yes
chr14:100259195-100260467	chr14	99792858	99794130	Eml1	chr14	99737721	99942060	yes
chr14:100267284-100267616	chr14	99800947	99801279	Eml1	chr14	99737721	99942060	yes
chr14:100338821-100339738	chr14	99872484	99873401	Eml1	chr14	99737721	99942060	yes
chr14:100358424-100358966	chr14	99892087	99892629	Eml1	chr14	99737721	99942060	yes
chr14:100449995-100450776	chr14	99983658	99984439	Yy1	chr14	100239143	100282788	yes
chr14:100485597-100486862	chr14	100019260	100020525	Yy1	chr14	100239143	100282788	yes
chr14:100581928-100582978	chr14	100115591	100116641	Wars1	chr14	100333788	100375467	yes
chr14:100771963-100773793	chr14	100305626	100307456	Yy1	chr14	100239143	100282788	yes
chr14:100909525-100910477	chr14	100443188	100444140	Yy1	chr14	100239143	100282788	yes
chr14:101314279-101315726	chr14	100847942	100849389	Yy1	chr14	100239143	100282788	yes
chr14:101534103-101535645	chr14	101067766	101069308	Yy1	chr14	100239143	100282788	yes
chr14:102275789-102276864	chr14	101809452	101810527	Ppp2r5c	chr14	101760572	101927977	yes
chr14:102291189-102292660	chr14	101824852	101826323	Hsp90aa1	chr14	102080741	102139749	yes
chr14:102760265-102761900	chr14	102293928	102295563	Ppp2r5c	chr14	101760572	101927977	yes
chr14:102784348-102784574	chr14	102318011	102318237	Hsp90aa1	chr14	102080741	102139749	yes
chr14:103237243-103238463	chr14	102770906	102772126	Cdca4	chr14	105009572	105021083	yes
chr14:104005097-104005512	chr14	103538760	103539175	Brf1	chr14	105209285	105300688	yes
chr14:104007428-104013543	chr14	103541091	103547206	Siva1	chr14	104752419	104759659	yes
chr14:104013827-104015886	chr14	103547490	103549549	Cdc42bpb	chr14	102932379	103057235	yes
chr14:104034068-104035828	chr14	103567731	103569491	Bag5	chr14	103556550	103562320	yes
chr14:104040387-104045359	chr14	103574050	103579022	Zfyve21	chr14	103715809	103733664	yes
chr14:104327379-104328363	chr14	103861042	103862026	Brf1	chr14	105209285	105300688	yes
chr14:104624050-104625917	chr14	104157713	104159580	Siva1	chr14	104752419	104759659	yes
chr14:104647480-104648287	chr14	104181143	104181950	Cdca4	chr14	105009572	105021083	yes
chr14:104686129-104686744	chr14	104219792	104220407	Cdca4	chr14	105009572	105021083	yes
chr14:104716860-104719453	chr14	104250523	104253116	Siva1	chr14	104752419	104759659	yes
chr14:104797861-104798306	chr14	104331524	104331969	Cdca4	chr14	105009572	105021083	yes
chr14:104844306-104845540	chr14	104377969	104379203	Siva1	chr14	104752419	104759659	yes
chr14:104849784-104852046	chr14	104383447	104385709	Cdca4	chr14	105009572	105021083	yes
chr14:104854444-104855069	chr14	104388107	104388732	Siva1	chr14	104752419	104759659	yes
chr14:105104977-105105992	chr14	104638640	104639655	Cdca4	chr14	105009572	105021083	yes
chr14:105158245-105158982	chr14	104691908	104692645	Eif5	chr14	103334236	103345025	yes
chr14:105243236-105247322	chr14	104776899	104780985	Akt1	chr14	104769348	104793601	yes
chr14:105248004-105252006	chr14	104781667	104785669	Cdca4	chr14	105009572	105021083	yes
chr14:105283209-105283332	chr14	104816872	104816995	Siva1	chr14	104752419	104759659	yes
chr14:105362891-105363245	chr14	104896554	104896908	Cdca4	chr14	105009572	105021083	yes
chr14:105801910-105802591	chr14	105335573	105336254	Siva1	chr14	104752419	104759659	yes
chr10:3279219-3279861	chr10	3237027	3237669	Net1	chr10	5412556	5458463	yes
chr7:42252224-42255257	chr7	42212625	42215658	Gli3	chr7	41960948	42237209	yes
chr7:42193592-42195516	chr7	42153993	42155917	Gli3	chr7	41960948	42237209	yes
chr7:42192020-42192638	chr7	42152421	42153039	Gli3	chr7	41960948	42237209	yes
chr7:39337031-39340122	chr7	39297432	39300523	Rala	chr7	39622954	39632381	yes
chr7:37039395-37040291	chr7	36999790	37000686	Zscan26	chr6	28267049	28278218	no
chr7:36849300-36849702	chr7	36809695	36810097	Zscan26	chr6	28267049	28278218	no
chr6:26183481-26184484	chr6	26183253	26184256	H2ac4	chr6	26033091	26033618	yes
chr6:25485367-25486784	chr6	25485139	25486556	Acot13	chr6	24667076	24705046	yes
chr6:24962955-24963232	chr6	24962727	24963004	H4c1	chr6	26021648	26022050	yes
chr6:24947443-24949588	chr6	24947215	24949360	Gmnn	chr6	24774936	24786099	yes
chr6:24918907-24920605	chr6	24918679	24920377	Gmnn	chr6	24774936	24786099	yes
chr6:23633817-23635664	chr6	23633589	23635436	Sox4	chr6	21593750	21598619	yes
chr6:22249722-22251383	chr6	22249493	22251154	Sox4	chr6	21593750	21598619	yes
chr6:22156299-22156844	chr6	22156070	22156615	Sox4	chr6	21593750	21598619	yes
chr6:22147305-22151821	chr6	22147076	22151592	Sox4	chr6	21593750	21598619	yes
chr6:21846639-21848122	chr6	21846408	21847891	Sox4	chr6	21593750	21598619	yes
chr6:21843838-21845364	chr6	21843607	21845133	Sox4	chr6	21593750	21598619	yes
chr6:21807782-21808526	chr6	21807551	21808295	Sox4	chr6	21593750	21598619	yes
chr6:21772708-21775062	chr6	21772477	21774831	Sox4	chr6	21593750	21598619	yes
chr6:21758997-21759396	chr6	21758766	21759165	Sox4	chr6	21593750	21598619	yes
chr6:21740150-21742131	chr6	21739919	21741900	Sox4	chr6	21593750	21598619	yes
chr6:21666134-21667820	chr6	21665903	21667589	Sox4	chr6	21593750	21598619	yes
chr6:21333695-21334840	chr6	21333464	21334609	Sox4	chr6	21593750	21598619	yes
chr6:21184816-21187159	chr6	21184585	21186928	Sox4	chr6	21593750	21598619	yes
chr6:21132904-21136021	chr6	21132673	21135790	Sox4	chr6	21593750	21598619	yes
chr6:20866296-20870311	chr6	20866065	20870080	Sox4	chr6	21593750	21598619	yes
chr6:3178871-3180464	chr6	3178637	3180230	Psmg4	chr6	3258972	3308224	yes
chr6:3237850-3238278	chr6	3237616	3238044	Cdyl	chr6	4706137	4955544	yes
chr6:3246813-3248753	chr6	3246579	3248519	Psmg4	chr6	3258972	3308224	yes
chr6:3284932-3286246	chr6	3284698	3286012	Psmg4	chr6	3258972	3308224	yes
chr6:3340264-3342485	chr6	3340030	3342251	Rpp40	chr6	4992404	5004058	yes
chr6:3345115-3346694	chr6	3344881	3346460	Psmg4	chr6	3258972	3308224	yes
chr6:3350106-3352929	chr6	3349872	3352695	Psmg4	chr6	3258972	3308224	yes
chr6:3375658-3376606	chr6	3375424	3376372	Psmg4	chr6	3258972	3308224	yes
chr6:3378223-3380044	chr6	3377989	3379810	Psmg4	chr6	3258972	3308224	yes
chr6:3385317-3387021	chr6	3385083	3386787	Prpf4b	chr6	4021299	4064983	yes
chr6:3397795-3400728	chr6	3397561	3400494	Psmg4	chr6	3258972	3308224	yes
chr6:3770277-3770698	chr6	3770043	3770464	Psmg4	chr6	3258972	3308224	yes
chr6:3777561-3778638	chr6	3777327	3778404	Rpp40	chr6	4992404	5004058	yes
chr6:3826399-3826986	chr6	3826165	3826752	Cdyl	chr6	4706137	4955544	yes
chr6:3909234-3911989	chr6	3909000	3911755	Rpp40	chr6	4992404	5004058	yes
chr6:4381380-4381845	chr6	4381146	4381611	Cdyl	chr6	4706137	4955544	yes
chr6:4606974-4607834	chr6	4606740	4607600	Bphl	chr6	3118375	3153198	yes
chr6:5481140-5482127	chr6	5480907	5481894	Ly86	chr6	6588638	6626823	yes
chr6:5765393-5766418	chr6	5765160	5766185	Nrn1	chr6	5997998	6004025	yes
chr12:3140738-3142506	chr12	3031572	3033340	Lyrm4	chr6	5031028	5260742	no
chr6:9112319-9113215	chr6	9112086	9112982	Snrnp48	chr6	7590197	7611967	yes
chr6:9200122-9200411	chr6	9199889	9200178	Tfap2a	chr6	10396676	10412391	yes
chr6:10556072-10556701	chr6	10555839	10556468	Pak1ip1	chr6	10690864	10709782	yes
chr6:10585666-10586217	chr6	10585433	10585984	Pak1ip1	chr6	10690864	10709782	yes
chr6:11232200-11234128	chr6	11231967	11233895	Nedd9	chr6	11183297	11382310	yes
chr6:11324910-11325882	chr6	11324677	11325649	Nedd9	chr6	11183297	11382310	yes
chr6:13737623-13738583	chr6	13737391	13738351	Dtnbp1	chr6	15522802	15662920	yes
chr6:13765926-13768108	chr6	13765694	13767876	Dtnbp1	chr6	15522802	15662920	yes
chr6:14001587-14002068	chr6	14001356	14001837	Dtnbp1	chr6	15522802	15662920	yes
chr6:14063416-14069520	chr6	14063185	14069289	Dtnbp1	chr6	15522802	15662920	yes
chr6:14140375-14142471	chr6	14140144	14142240	Dtnbp1	chr6	15522802	15662920	yes
chr6:14242555-14243959	chr6	14242324	14243728	Mcur1	chr6	13786556	13814557	yes
chr6:14634024-14634582	chr6	14633793	14634351	Dtnbp1	chr6	15522802	15662920	yes
chr6:14641897-14642865	chr6	14641666	14642634	Dtnbp1	chr6	15522802	15662920	yes
chr6:14758494-14758875	chr6	14758263	14758644	Dtnbp1	chr6	15522802	15662920	yes
chr6:14861659-14863486	chr6	14861428	14863255	Dtnbp1	chr6	15522802	15662920	yes
chr6:14871626-14872468	chr6	14871395	14872237	Tbc1d7	chr6	13304950	13328537	yes
chr6:14910752-14911357	chr6	14910521	14911126	Ranbp9	chr6	13621497	13686905	yes
chr6:14996402-14996550	chr6	14996171	14996319	Dtnbp1	chr6	15522802	15662920	yes
chr6:15263747-15266302	chr6	15263516	15266071	Dtnbp1	chr6	15522802	15662920	yes
chr6:15268455-15268984	chr6	15268224	15268753	Dtnbp1	chr6	15522802	15662920	yes
chr6:15399052-15404493	chr6	15398821	15404262	Dtnbp1	chr6	15522802	15662920	yes
chr6:17212888-17214338	chr6	17212657	17214107	Atxn1	chr6	16299111	16761460	yes
chr6:17965478-17965764	chr6	17965247	17965533	Nup153	chr6	17615035	17706425	yes
chr6:18046386-18047161	chr6	18046155	18046930	Nup153	chr6	17615035	17706425	yes
chr6:18491041-18491973	chr6	18490810	18491742	Dek	chr6	18223859	18264530	yes
chr6:18590820-18591539	chr6	18590589	18591308	Id4	chr6	19837369	19842197	yes
chr6:19086455-19087288	chr6	19086224	19087057	Dek	chr6	18223859	18264530	yes
chr6:19298113-19298907	chr6	19297882	19298676	Dek	chr6	18223859	18264530	yes
chr6:19312036-19313099	chr6	19311805	19312868	Dek	chr6	18223859	18264530	yes
chr6:19381583-19383358	chr6	19381352	19383127	Id4	chr6	19837369	19842197	yes
chr6:19659491-19660570	chr6	19659260	19660339	Dek	chr6	18223859	18264530	yes
chr6:19691398-19693547	chr6	19691167	19693316	Dek	chr6	18223859	18264530	yes
chr6:19734277-19735203	chr6	19734046	19734972	Dek	chr6	18223859	18264530	yes
chr9:96902298-96902942	chr9	94140016	94140660	Phf2	chr9	93576583	93679587	yes
chr9:96068804-96069515	chr9	93306522	93307233	Bicd2	chr9	92711362	92764833	yes
chr9:95963760-95964837	chr9	93201478	93202555	Cenpp	chr9	92325456	92494169	yes
chr9:95917942-95919205	chr9	93155660	93156923	Card19	chr9	93096216	93113283	yes
chr9:95351308-95353232	chr9	92589026	92590950	Card19	chr9	93096216	93113283	yes
chr9:91321044-91321942	chr9	88706129	88707027	Cks2	chr9	89311194	89316703	yes
chr9:91428762-91430721	chr9	88813847	88815806	Cks2	chr9	89311194	89316703	yes
chr9:91615414-91615953	chr9	89000499	89001038	Cks2	chr9	89311194	89316703	yes
chr9:91792919-91796266	chr9	89178004	89181351	Secisbp2	chr9	89318499	89359647	yes
chr9:92030397-92031158	chr9	89415482	89416243	Gadd45g	chr9	89605008	89606555	yes
chr9:92068484-92069056	chr9	89453569	89454141	Gadd45g	chr9	89605008	89606555	yes
chr9:92128837-92129540	chr9	89513922	89514625	Sema4d	chr9	89360786	89479890	yes
chr9:92149089-92152923	chr9	89534174	89538008	Sema4d	chr9	89360786	89479890	yes
chr9:92276198-92277261	chr9	89661283	89662346	Gadd45g	chr9	89605008	89606555	yes
chr9:92288397-92294088	chr9	89673482	89679173	Gadd45g	chr9	89605008	89606555	yes
chr9:92498953-92500227	chr9	89797506	89798780	Gadd45g	chr9	89605008	89606555	yes
chr9:94620124-94620581	chr9	91857842	91858299	Sptlc1	chr9	92031140	92071240	yes
chr5:175180937-175181734	chr5	175753934	175754731	Sfxn1	chr5	175478559	175513736	yes
chr5:175228732-175230164	chr5	175801729	175803161	Sfxn1	chr5	175478559	175513736	yes
chr5:176046112-176047081	chr5	176619111	176620080	Lman2	chr5	177331566	177351668	yes
chr5:176152324-176153372	chr5	176725323	176726371	Ddx41	chr5	177511576	177516950	yes
chr5:176160264-176160715	chr5	176733263	176733714	Nsd1	chr5	177133014	177300213	yes
chr5:176525024-176525827	chr5	177098023	177098826	Ddx41	chr5	177511576	177516950	yes
chr5:176527739-176530906	chr5	177100738	177103905	Ddx41	chr5	177511576	177516950	yes
chr5:176880191-176883371	chr5	177453190	177456370	Ddx41	chr5	177511576	177516950	yes
chr5:134703372-134705791	chr5	135367682	135370101	Tgfbi	chr5	136028987	136063818	yes
chr5:134812704-134813804	chr5	135477014	135478114	Neurog1	chr5	135534281	135535964	yes
chr5:134824471-134825782	chr5	135488781	135490092	Neurog1	chr5	135534281	135535964	yes
chr5:134879327-134881845	chr5	135543637	135546155	Neurog1	chr5	135534281	135535964	yes
chr5:135336608-135338507	chr5	136000919	136002818	Neurog1	chr5	135534281	135535964	yes
chr5:135549470-135550461	chr5	136213782	136214773	Neurog1	chr5	135534281	135535964	yes
chr5:135911930-135912695	chr5	136576241	136577006	Neurog1	chr5	135534281	135535964	yes
chr5:136178213-136179141	chr5	136842524	136843452	Neurog1	chr5	135534281	135535964	yes
chr5:136814655-136815182	chr5	137478966	137479493	Neurog1	chr5	135534281	135535964	yes
chr5:137071257-137071883	chr5	137735568	137736194	Idnk	chr9	83622323	83641541	no
chr9:87305218-87306459	chr9	84690303	84691544	Agtpbp1	chr9	85546538	85654575	yes
chr9:87507902-87509486	chr9	84892987	84894571	Golm1	chr9	86026145	86099558	yes
chr9:87551324-87552707	chr9	84936409	84937792	Golm1	chr9	86026145	86099558	yes
chr9:87604881-87607021	chr9	84989966	84992106	Golm1	chr9	86026145	86099558	yes
chr9:87653254-87654735	chr9	85038339	85039820	Golm1	chr9	86026145	86099558	yes
chr9:87656001-87656596	chr9	85041086	85041681	Golm1	chr9	86026145	86099558	yes
chr9:88233744-88234963	chr9	85618829	85620048	Golm1	chr9	86026145	86099558	yes
chr9:88297404-88298644	chr9	85682489	85683729	Agtpbp1	chr9	85546538	85654575	yes
chr9:88671224-88675449	chr9	86056309	86060534	Naa35	chr9	85941141	86026355	yes
chr9:89191668-89193933	chr9	86576753	86579018	Gas1	chr9	86944361	86947506	yes
chr9:89213564-89213951	chr9	86598649	86599036	Gas1	chr9	86944361	86947506	yes
chr9:89258866-89260476	chr9	86643951	86645561	Gas1	chr9	86944361	86947506	yes
chr9:89469950-89470204	chr9	86855035	86855289	Gas1	chr9	86944361	86947506	yes
chr9:89483020-89484162	chr9	86868105	86869247	Gas1	chr9	86944361	86947506	yes
chr9:89516633-89518681	chr9	86901718	86903766	Gas1	chr9	86944361	86947506	yes
chr9:89555094-89556944	chr9	86940179	86942029	Gas1	chr9	86944361	86947506	yes
chr9:90007902-90009238	chr9	87392987	87394323	Tut7	chr9	86287732	86345732	yes
chr9:90145557-90146022	chr9	87530642	87531107	Gas1	chr9	86944361	86947506	yes
chr9:98255327-98258742	chr9	95493045	95496460	Ercc6l2	chr9	95875631	96014567	yes
chr9:98899479-98900118	chr9	96137197	96137836	Ercc6l2	chr9	95875631	96014567	yes
chr5:6250338-6252253	chr5	6250225	6252140	Med10	chr5	6371873	6378547	yes
chr5:6198392-6201062	chr5	6198279	6200949	Med10	chr5	6371873	6378547	yes
chr5:5751529-5753067	chr5	5751416	5752954	Med10	chr5	6371873	6378547	yes
chr5:5581947-5583007	chr5	5581834	5582894	Med10	chr5	6371873	6378547	yes
chr5:5042828-5045094	chr5	5042715	5044981	Ndufs6	chr5	1801406	1816048	yes
chr5:4832790-4834239	chr5	4832677	4834126	Mrpl36	chr5	1798384	1799361	yes
chr5:4700257-4701622	chr5	4700144	4701509	Irx1	chr5	3595831	3601403	yes
chr5:4646901-4648284	chr5	4646788	4648171	Irx1	chr5	3595831	3601403	yes
chr5:4634923-4638367	chr5	4634810	4638254	Irx1	chr5	3595831	3601403	yes
chr5:4570167-4571195	chr5	4570054	4571082	Mrpl36	chr5	1798384	1799361	yes
chr5:4511269-4512940	chr5	4511156	4512827	Mrpl36	chr5	1798384	1799361	yes
chr5:4013379-4013880	chr5	4013265	4013766	Mrpl36	chr5	1798384	1799361	yes
chr5:3605907-3609223	chr5	3605793	3609109	Irx2	chr5	2707929	2751582	yes
chr5:3590643-3591416	chr5	3590529	3591302	Irx2	chr5	2707929	2751582	yes
chr5:3489228-3490086	chr5	3489114	3489972	Irx1	chr5	3595831	3601403	yes
chr5:3197577-3199584	chr5	3197463	3199470	Irx1	chr5	3595831	3601403	yes
chr5:3194415-3194784	chr5	3194301	3194670	Mrpl36	chr5	1798384	1799361	yes
chr5:3181070-3184477	chr5	3180956	3184363	Irx1	chr5	3595831	3601403	yes
chr5:2755414-2757260	chr5	2755300	2757146	Irx2	chr5	2707929	2751582	yes
chr5:2739435-2741515	chr5	2739321	2741401	Irx2	chr5	2707929	2751582	yes
chr5:2535694-2538651	chr5	2535580	2538537	Irx2	chr5	2707929	2751582	yes
chr5:2334696-2335382	chr5	2334582	2335268	Irx1	chr5	3595831	3601403	yes
chr5:2205945-2207045	chr5	2205831	2206931	Irx1	chr5	3595831	3601403	yes
chr5:2128686-2129974	chr5	2128572	2129860	Irx2	chr5	2707929	2751582	yes
chr5:2038961-2039964	chr5	2038847	2039850	Irx2	chr5	2707929	2751582	yes
chr5:1834438-1835754	chr5	1834324	1835640	Irx1	chr5	3595831	3601403	yes
chr5:92934158-92935216	chr5	93598452	93599510	Slf1	chr5	94613475	94697733	yes
chr5:92923389-92926126	chr5	93587683	93590420	Slf1	chr5	94613475	94697733	yes
chr5:89856431-89858845	chr5	90560614	90563028	Adgrv1	chr5	90558795	91164216	yes
chr5:87853659-87854450	chr5	88557841	88558632	Tmem161b	chr5	88179299	88246449	yes
chr5:87834898-87838698	chr5	88539080	88542880	Tmem161b	chr5	88179299	88246449	yes
chr5:87776330-87777557	chr5	88480513	88481740	Tmem161b	chr5	88179299	88246449	yes
chr5:87684969-87701641	chr5	88389152	88405824	Tmem161b	chr5	88179299	88246449	yes
chr5:87433480-87442469	chr5	88137663	88146652	Tmem161b	chr5	88179299	88246449	yes
chr5:87384236-87386218	chr5	88088419	88090401	Tmem161b	chr5	88179299	88246449	yes
chr5:87076561-87080878	chr5	87780744	87785061	Tmem161b	chr5	88179299	88246449	yes
chr5:87074060-87075698	chr5	87778243	87779881	Tmem161b	chr5	88179299	88246449	yes
chr5:81370545-81371143	chr5	82074726	82075324	Atg10	chr5	81972020	82258502	yes
chr5:81146335-81148823	chr5	81850516	81853004	Atg10	chr5	81972020	82258502	yes
chr5:79444565-79445640	chr5	80148742	80149817	Tent2	chr5	79612420	79686643	yes
chr5:79405441-79409874	chr5	80109618	80114051	Ankrd34b	chr5	80556754	80564709	yes
chr5:79394262-79395817	chr5	80098439	80099994	Tent2	chr5	79612420	79686643	yes
chr5:78202879-78204949	chr5	78907056	78909126	Otp	chr5	77628711	77638713	yes
chr5:77805727-77806652	chr5	78509904	78510829	Wdr41	chr5	77430519	77620611	yes
chr5:77799989-77801447	chr5	78504166	78505624	Scamp1	chr5	78360529	78480739	yes
chr5:77576398-77576767	chr5	78280574	78280943	Wdr41	chr5	77430519	77620611	yes
chr5:75986511-75987415	chr5	76690686	76691590	F2r	chr5	76716125	76735770	yes
chr5:73923424-73927221	chr5	74627599	74631396	Enc1	chr5	74627408	74640728	yes
chr5:73919040-73919661	chr5	74623215	74623836	Enc1	chr5	74627408	74640728	yes
chr5:73885216-73886753	chr5	74589391	74590928	Enc1	chr5	74627408	74640728	yes
chr5:73795204-73796432	chr5	74499379	74500607	Enc1	chr5	74627408	74640728	yes
chr5:73728234-73730214	chr5	74432409	74434389	Enc1	chr5	74627408	74640728	yes
chr5:73725004-73726986	chr5	74429179	74431161	Enc1	chr5	74627408	74640728	yes
chr5:73633235-73633827	chr5	74337410	74338002	Enc1	chr5	74627408	74640728	yes
chr5:73425954-73427329	chr5	74130129	74131504	Enc1	chr5	74627408	74640728	yes
chr5:73374636-73378163	chr5	74078811	74082338	Enc1	chr5	74627408	74640728	yes
chr5:73349527-73352616	chr5	74053702	74056791	Enc1	chr5	74627408	74640728	yes
chr5:73236174-73236360	chr5	73940349	73940535	Enc1	chr5	74627408	74640728	yes
chr5:71966511-71967786	chr5	72670684	72671959	Mrps27	chr5	72219402	72320240	yes
chr5:71695988-71698410	chr5	72400161	72402583	Tnpo1	chr5	72816649	72914388	yes
chr5:71474543-71480576	chr5	72178716	72184749	Map1b	chr5	72107474	72209565	yes
chr5:71448218-71449709	chr5	72152391	72153882	Map1b	chr5	72107474	72209565	yes
chr5:71429873-71431356	chr5	72134046	72135529	Map1b	chr5	72107474	72209565	yes
chr5:71417336-71420662	chr5	72121509	72124835	Map1b	chr5	72107474	72209565	yes
chr5:71330893-71331720	chr5	72035066	72035893	Map1b	chr5	72107474	72209565	yes
chr5:71309314-71311278	chr5	72013487	72015451	Map1b	chr5	72107474	72209565	yes
chr5:71199396-71200655	chr5	71903569	71904828	Map1b	chr5	72107474	72209565	yes
chr5:67777474-67778621	chr5	68481647	68482794	Pik3r1	chr5	68215736	68301821	yes
chr5:65975954-65976640	chr5	66680126	66680812	Mast4	chr5	66596353	67169595	yes
chr5:64428091-64429671	chr5	65132264	65133844	Rgs7bp	chr5	64505946	64598439	yes
chr5:64421410-64422636	chr5	65125583	65126809	Ppwd1	chr5	65563294	65587549	yes
chr5:64356992-64357320	chr5	65061165	65061493	Rgs7bp	chr5	64505946	64598439	yes
chr5:63986179-63986830	chr5	64690352	64691003	Rgs7bp	chr5	64505946	64598439	yes
chr5:63852997-63853651	chr5	64557170	64557824	Rgs7bp	chr5	64505946	64598439	yes
chr5:63509093-63510282	chr5	64213266	64214455	Srek1ip1	chr5	64718147	64768691	yes
chr5:61032148-61034628	chr5	61736321	61738801	Zswim6	chr5	61332257	61546172	yes
chr5:60951644-60953676	chr5	61655817	61657849	Zswim6	chr5	61332257	61546172	yes
chr5:60905706-60906867	chr5	61609879	61611040	Zswim6	chr5	61332257	61546172	yes
chr5:60889412-60890129	chr5	61593585	61594302	Zswim6	chr5	61332257	61546172	yes
chr5:60734038-60734691	chr5	61438211	61438864	Zswim6	chr5	61332257	61546172	yes
chr5:60697183-60698101	chr5	61401356	61402274	Zswim6	chr5	61332257	61546172	yes
chr5:60557607-60560014	chr5	61261780	61264187	Zswim6	chr5	61332257	61546172	yes
chr5:60429402-60434153	chr5	61133575	61138326	Zswim6	chr5	61332257	61546172	yes
chr5:59500714-59502319	chr5	60204887	60206492	Pde4d	chr5	58969037	59768848	yes
chr5:56796923-56798423	chr5	57501096	57502596	Plk2	chr5	58453981	58460086	yes
chr5:56694791-56697933	chr5	57398964	57402106	Rab3c	chr5	58582151	58859394	yes
chr5:56147823-56151504	chr5	56851996	56855677	Map3k1	chr5	56815542	56896152	yes
chr5:56120517-56141845	chr5	56824690	56846018	Map3k1	chr5	56815542	56896152	yes
chr5:55971992-55976255	chr5	56676165	56680428	Map3k1	chr5	56815542	56896152	yes
chr5:55964227-55966300	chr5	56668400	56670473	Map3k1	chr5	56815542	56896152	yes
chr5:55912003-55913524	chr5	56616176	56617697	Map3k1	chr5	56815542	56896152	yes
chr5:55886998-55889783	chr5	56591171	56593956	Map3k1	chr5	56815542	56896152	yes
chr5:55882052-55886039	chr5	56586225	56590212	Map3k1	chr5	56815542	56896152	yes
chr5:55841415-55843899	chr5	56545588	56548072	Map3k1	chr5	56815542	56896152	yes
chr5:55776400-55777251	chr5	56480573	56481424	Gpbp1	chr5	57174058	57264673	yes
chr5:55704352-55707491	chr5	56408525	56411664	Map3k1	chr5	56815542	56896152	yes
chr5:55615499-55616170	chr5	56319672	56320343	Map3k1	chr5	56815542	56896152	yes
chr5:55567911-55572923	chr5	56272084	56277096	Map3k1	chr5	56815542	56896152	yes
chr5:54098973-54100679	chr5	54803145	54804851	Snx18	chr5	54517758	54546586	yes
chr5:53702516-53703288	chr5	54406686	54407458	Arl15	chr5	53883941	54310425	yes
chr5:45506828-45507779	chr5	45506726	45507677	Hcn1	chr5	45254947	45696380	yes
chr5:43602850-43603977	chr5	43602748	43603875	Paip1	chr5	43526266	43557077	yes
chr3:58088624-58090358	chr3	58102897	58104631	Fam107a	chr3	58564116	58627610	yes
chr3:58473073-58473709	chr3	58487346	58487982	Pxk	chr3	58332891	58426127	yes
chr3:62222465-62222974	chr3	62236791	62237300	Ptprg	chr3	61561570	62297609	yes
chr3:62227062-62230138	chr3	62241388	62244464	Ptprg	chr3	61561570	62297609	yes
chr3:63955791-63957263	chr3	63970115	63971587	Psmd6	chr3	64010550	64023125	yes
chr3:25872034-25873442	chr3	25830543	25831951	Top2b	chr3	25597904	25664372	yes
chr3:23851686-23852217	chr3	23810195	23810726	Ube2e1	chr3	23805954	23891640	yes
chr14:52389235-52390104	chr14	51922517	51923386	Rtraf	chr14	51989545	52010694	yes
chr14:52312521-52316035	chr14	51845803	51849317	Rtraf	chr14	51989545	52010694	yes
chr6:39241373-39243808	chr6	39273597	39276032	Kcnk5	chr6	39188970	39194696	yes
chr10:75616742-75617294	chr10	73856984	73857536	Ap3m1	chr10	74120011	74151044	yes
chr10:76177563-76179217	chr10	74417805	74419459	Kat6b	chr10	74824926	75032623	yes
chr10:76399710-76401300	chr10	74639952	74641542	Kat6b	chr10	74824926	75032623	yes
chr10:76627410-76629000	chr10	74867652	74869242	Kat6b	chr10	74824926	75032623	yes
chr10:76789125-76790436	chr10	75029367	75030678	Vdac2	chr10	75210169	75231448	yes
chr10:79080191-79081706	chr10	77320433	77321948	Rps24	chr10	78033862	78040697	yes
chr10:79631732-79632915	chr10	77871974	77873157	Rps24	chr10	78033862	78040697	yes
chr10:79685636-79687076	chr10	77925878	77927318	Rps24	chr10	78033862	78040697	yes
chr10:79804736-79807960	chr10	78044978	78048202	Rps24	chr10	78033862	78040697	yes
chr10:80302807-80305066	chr10	78543050	78545309	Zmiz1	chr10	79068965	79316519	yes
chr10:80319550-80320368	chr10	78559793	78560611	Ppif	chr10	79347468	79355334	yes
chr10:80386399-80387925	chr10	78626642	78628168	Zcchc24	chr10	79382324	79445624	yes
chr10:80415572-80417308	chr10	78655815	78657551	Ppif	chr10	79347468	79355334	yes
chr10:80417815-80419272	chr10	78658058	78659515	Ppif	chr10	79347468	79355334	yes
chr10:80448600-80449225	chr10	78688843	78689468	Zmiz1	chr10	79068965	79316519	yes
chr10:80561869-80563577	chr10	78802112	78803820	Ppif	chr10	79347468	79355334	yes
chr10:80672730-80674541	chr10	78912973	78914784	Ppif	chr10	79347468	79355334	yes
chr10:80679425-80679622	chr10	78919668	78919865	Ppif	chr10	79347468	79355334	yes
chr10:80691312-80691781	chr10	78931555	78932024	Ppif	chr10	79347468	79355334	yes
chr10:80723525-80725329	chr10	78963768	78965572	Zmiz1	chr10	79068965	79316519	yes
chr10:80732994-80734603	chr10	78973237	78974846	Ppif	chr10	79347468	79355334	yes
chr10:80753392-80753980	chr10	78993635	78994223	Ppif	chr10	79347468	79355334	yes
chr10:80755195-80756957	chr10	78995438	78997200	Ppif	chr10	79347468	79355334	yes
chr10:80784504-80785764	chr10	79024747	79026007	Ppif	chr10	79347468	79355334	yes
chr10:80837989-80841004	chr10	79078232	79081247	Zmiz1	chr10	79068965	79316519	yes
chr10:80841070-80842179	chr10	79081313	79082422	Zmiz1	chr10	79068965	79316519	yes
chr10:80844245-80845497	chr10	79084488	79085740	Ppif	chr10	79347468	79355334	yes
chr10:80847564-80848599	chr10	79087807	79088842	Ppif	chr10	79347468	79355334	yes
chr10:80849820-80851991	chr10	79090063	79092234	Zmiz1	chr10	79068965	79316519	yes
chr10:80853818-80854227	chr10	79094061	79094470	Zcchc24	chr10	79382324	79445624	yes
chr10:80866728-80869484	chr10	79106971	79109727	Zmiz1	chr10	79068965	79316519	yes
chr10:80872381-80873976	chr10	79112624	79114219	Ppif	chr10	79347468	79355334	yes
chr10:80892245-80893558	chr10	79132488	79133801	Ppif	chr10	79347468	79355334	yes
chr10:80937647-80938531	chr10	79177890	79178774	Zmiz1	chr10	79068965	79316519	yes
chr10:80939035-80939676	chr10	79179278	79179919	Zmiz1	chr10	79068965	79316519	yes
chr10:80945015-80946217	chr10	79185258	79186460	Ppif	chr10	79347468	79355334	yes
chr10:80974066-80974425	chr10	79214309	79214668	Ppif	chr10	79347468	79355334	yes
chr10:80978823-80983794	chr10	79219066	79224037	Ppif	chr10	79347468	79355334	yes
chr10:81001527-81004567	chr10	79241770	79244810	Ppif	chr10	79347468	79355334	yes
chr10:81018912-81021649	chr10	79259155	79261892	Ppif	chr10	79347468	79355334	yes
chr10:81028235-81029900	chr10	79268478	79270143	Zmiz1	chr10	79068965	79316519	yes
chr10:81032724-81035317	chr10	79272967	79275560	Ppif	chr10	79347468	79355334	yes
chr10:81037131-81037809	chr10	79277374	79278052	Ppif	chr10	79347468	79355334	yes
chr10:81201686-81202186	chr10	79441930	79442430	Ppif	chr10	79347468	79355334	yes
chr3:57311347-57312049	chr3	57277319	57278021	Appl1	chr3	57227728	57273471	yes
chr3:52566600-52568871	chr3	52532584	52534855	Pbrm1	chr3	52545366	52685419	yes
chr3:52478876-52478989	chr3	52444860	52444973	Eaf1	chr3	15427597	15442613	yes
chr3:15674799-15678238	chr3	15633292	15636731	Ankrd28	chr3	15667235	15756547	yes
chr3:15688350-15689413	chr3	15646843	15647906	Ankrd28	chr3	15667235	15756547	yes
chr10:50290347-50292169	chr10	49082302	49084124	Mapk8	chr10	48306672	48435881	yes
chr10:50135377-50136446	chr10	48927332	48928401	Mapk8	chr10	48306672	48435881	yes
chr10:50059656-50060205	chr10	48851611	48852160	Mapk8	chr10	48306672	48435881	yes
chr10:48650891-48654749	chr10	47084613	47088471	Mapk8	chr10	48306672	48435881	yes
chr10:88623265-88628647	chr10	86863508	86868890	Sncg	chr10	86955758	86963258	yes
chr10:82224238-82225415	chr10	80464482	80465659	Tspan14	chr10	80454274	80521072	yes
chr14:53327706-53329865	chr14	52860988	52863147	Psmc6	chr14	52707162	52727996	yes
chr14:53477447-53478252	chr14	53010729	53011534	Ero1a	chr14	52639914	52695558	yes
chr14:56227560-56228708	chr14	55760842	55761990	Socs4	chr14	55027130	55049489	yes
chr14:56273771-56274082	chr14	55807053	55807364	Socs4	chr14	55027130	55049489	yes
chr14:56546599-56548704	chr14	56079881	56081986	Socs4	chr14	55027130	55049489	yes
chr14:56554390-56555329	chr14	56087672	56088611	Fbxo34	chr14	55271420	55353611	yes
chr14:56556653-56557598	chr14	56089935	56090880	Atg14	chr14	55366390	55394715	yes
chr14:56646642-56648868	chr14	56179924	56182150	Dlgap5	chr14	55148129	55191369	yes
chr14:56686469-56686961	chr14	56219751	56220243	Dlgap5	chr14	55148129	55191369	yes
chr14:57020142-57021266	chr14	56553424	56554548	Tmem260	chr14	56579791	56651884	yes
chr14:57552073-57552609	chr14	57085355	57085891	Otx2	chr14	56799904	56805667	yes
chr14:58618368-58618919	chr14	58151650	58152201	Armh4	chr14	57993535	58152213	yes
chr14:22004326-22005301	chr14	21536192	21537167	Mettl3	chr14	21498137	21511311	yes
chr14:22977263-22978480	chr14	22508278	22509497	Zfhx2	chr14	23520856	23551765	yes
chr14:23745470-23746249	chr14	23276261	23277040	Dhrs4	chr14	23953734	23964619	yes
chr14:23832708-23836337	chr14	23363499	23367128	Prmt5	chr14	22920525	22929376	yes
chr14:23981013-23984631	chr14	23511804	23515422	Cmtm5	chr14	23376431	23379770	yes
chr14:24545738-24546308	chr14	24076529	24077099	Cmtm5	chr14	23376431	23379770	yes
chr14:24548552-24550676	chr14	24079343	24081467	Pabpn1	chr14	23321456	23326163	yes
chr14:24835399-24836333	chr14	24366193	24367127	Cenpj	chr13	24882278	24922861	no
chr13:20991284-20991994	chr13	20417145	20417855	Ift88	chr13	20566445	20691364	yes
chr13:21588363-21588703	chr13	21014224	21014564	Ska3	chr13	21153594	21176534	yes
chr13:21617517-21617774	chr13	21043378	21043635	Ska3	chr13	21153594	21176534	yes
chr13:50150909-50151990	chr13	49576773	49577854	Rcbtb1	chr13	49531943	49580559	yes
chr13:26544487-26544959	chr13	25970349	25970821	Mtmr6	chr13	25246221	25287488	yes
chr13:25710754-25712326	chr13	25136616	25138188	Atp8a2	chr13	25371973	26025851	yes
chr13:24657229-24658878	chr13	24083090	24084739	Spata13	chr13	23979801	24307069	yes
chr13:24680498-24681114	chr13	24106359	24106975	Spata13	chr13	23979801	24307069	yes
chr13:24742127-24743462	chr13	24167988	24169323	Spata13	chr13	23979801	24307069	yes
chr13:24773416-24777707	chr13	24199278	24203569	Spata13	chr13	23979801	24307069	yes
chr13:24793114-24793471	chr13	24218976	24219333	Spata13	chr13	23979801	24307069	yes
chr13:24848338-24849131	chr13	24274200	24274993	Spata13	chr13	23979801	24307069	yes
chr13:24153100-24153793	chr13	23578961	23579654	Tnfrsf19	chr13	23570247	23670376	yes
chr13:24007382-24007849	chr13	23433243	23433710	Mipep	chr13	23730188	23888757	yes
chr13:50224082-50224993	chr13	49649946	49650857	Dleu2	chr13	49982548	50125541	yes
chr13:51564113-51566205	chr13	50989977	50992069	Rnaseh2b	chr13	50909677	50970460	yes
chr13:51568078-51569523	chr13	50993942	50995387	Rnaseh2b	chr13	50909677	50970460	yes
chr13:51599007-51601019	chr13	51024871	51026883	Rnaseh2b	chr13	50909677	50970460	yes
chr13:51820499-51821881	chr13	51246363	51247745	Wdfy2	chr13	51584193	51766799	yes
chr8:10275686-10280044	chr8	10418176	10422534	Msra	chr8	10054223	10250648	yes
chr8:10262288-10263529	chr8	10404778	10406019	Msra	chr8	10054223	10250648	yes
chr8:10255787-10257811	chr8	10398277	10400301	Msra	chr8	10054223	10250648	yes
chr8:10222098-10223325	chr8	10364588	10365815	Msra	chr8	10054223	10250648	yes
chr8:10217537-10219229	chr8	10360027	10361719	Msra	chr8	10054223	10250648	yes
chr8:10067632-10069396	chr8	10210122	10211886	Msra	chr8	10054223	10250648	yes
chr8:9820241-9823348	chr8	9962731	9965838	Msra	chr8	10054223	10250648	yes
chr8:28533148-28534362	chr8	28675631	28676845	Kif13b	chr8	29067277	29250091	yes
chr8:28515084-28515877	chr8	28657567	28658360	Kif13b	chr8	29067277	29250091	yes
chr8:28190617-28191453	chr8	28333100	28333936	Clu	chr8	27596916	27614700	yes
chr8:27138197-27139321	chr8	27280680	27281804	Adra1a	chr8	26738112	26867270	yes
chr8:27131926-27132558	chr8	27274409	27275041	Adra1a	chr8	26738112	26867270	yes
chr8:27115132-27115918	chr8	27257615	27258401	Adra1a	chr8	26738112	26867270	yes
chr8:27061646-27062680	chr8	27204129	27205163	Adra1a	chr8	26738112	26867270	yes
chr8:27002259-27003751	chr8	27144742	27146234	Adra1a	chr8	26738112	26867270	yes
chr8:26906369-26908667	chr8	27048852	27051150	Adra1a	chr8	26738112	26867270	yes
chr8:25894467-25896255	chr8	26036951	26038739	Ppp2r2a	chr8	26291507	26372680	yes
chr8:25828806-25829968	chr8	25971290	25972452	Ppp2r2a	chr8	26291507	26372680	yes
chr8:25821853-25822351	chr8	25964337	25964835	Ebf2	chr8	25841724	26045413	yes
chr8:25819640-25820540	chr8	25962124	25963024	Ebf2	chr8	25841724	26045413	yes
chr8:25780646-25780990	chr8	25923130	25923474	Ppp2r2a	chr8	26291507	26372680	yes
chr8:25531248-25534161	chr8	25673732	25676645	Ppp2r2a	chr8	26291507	26372680	yes
chr8:23193466-23194122	chr8	23335953	23336609	Loxl2	chr8	23296896	23404120	yes
chr8:23162755-23163258	chr8	23305242	23305745	Chmp7	chr8	23243636	23261999	yes
chr8:22002588-22003938	chr8	22145075	22146425	Bmp1	chr8	22165371	22201482	yes
chr8:21966423-21967358	chr8	22108912	22109845	Reep4	chr8	22138019	22141907	yes
chr13:49462633-49463474	chr13	48888497	48889338	Fndc3a	chr13	48975240	49209593	yes
chr13:48684399-48685464	chr13	48110263	48111328	Itm2b	chr13	48233205	48270357	yes
chr13:47216047-47216462	chr13	46641912	46642327	Esd	chr13	46771255	46797137	yes
chr13:46371581-46372491	chr13	45797446	45798356	Slc25a30	chr13	45393315	45418373	yes
chr13:45676426-45677850	chr13	45102291	45103715	Tpt1	chr13	45333470	45341183	yes
chr13:45423319-45424170	chr13	44849183	44850034	Tpt1	chr13	45333470	45341183	yes
chr13:45379871-45382152	chr13	44805735	44808016	Tpt1	chr13	45333470	45341183	yes
chr13:44970906-44971617	chr13	44396770	44397481	Tsc22d1	chr13	44432142	44436858	yes
chr13:44885387-44886322	chr13	44311251	44312186	Serp2	chr13	44373522	44397714	yes
chr13:44876240-44876484	chr13	44302104	44302348	Serp2	chr13	44373522	44397714	yes
chr13:44827112-44827586	chr13	44252976	44253450	Tsc22d1	chr13	44432142	44436858	yes
chr13:44765848-44766423	chr13	44191712	44192287	Tsc22d1	chr13	44432142	44436858	yes
chr13:44729492-44729949	chr13	44155356	44155813	Tsc22d1	chr13	44432142	44436858	yes
chr13:44700320-44701316	chr13	44126184	44127180	Tsc22d1	chr13	44432142	44436858	yes
chr13:44253045-44255330	chr13	43678909	43681194	Dnajc15	chr13	43023585	43114213	yes
chr13:43524234-43524956	chr13	42950098	42950820	Dnajc15	chr13	43023585	43114213	yes
chr13:42138441-42140603	chr13	41564305	41566467	Naa16	chr13	41311238	41336643	yes
chr13:42136179-42136678	chr13	41562043	41562542	Naa16	chr13	41311238	41336643	yes
chr13:53568381-53569900	chr13	52994246	52995765	Pcdh8	chr13	52842888	52848640	yes
chr13:53718234-53720632	chr13	53144099	53146497	Pcdh8	chr13	52842888	52848640	yes
chr13:72332793-72335111	chr13	71758661	71760979	Dach1	chr13	71437965	71675206	yes
chr13:78542834-78544100	chr13	77968699	77969965	Obi1	chr13	78614285	78659165	yes
chr13:78604054-78604407	chr13	78029919	78030272	Obi1	chr13	78614285	78659165	yes
chr13:80378028-80378613	chr13	79803893	79804478	Spry2	chr13	80335975	80339659	yes
chr13:80379923-80381230	chr13	79805788	79807095	Spry2	chr13	80335975	80339659	yes
chr13:80933223-80936586	chr13	80359088	80362451	Spry2	chr13	80335975	80339659	yes
chr13:95085694-95086561	chr13	94433440	94434307	Gpc6	chr13	93226806	94408020	yes
chr13:95358494-95361292	chr13	94706240	94709038	Tgds	chr13	94574053	94596152	yes
chr13:95481987-95482362	chr13	94829733	94830108	Tgds	chr13	94574053	94596152	yes
chr13:95599977-95600972	chr13	94947723	94948718	Sox21	chr13	94709621	94712545	yes
chr13:97734487-97736602	chr13	97082233	97084348	Rap2a	chr13	97434168	97469128	yes
chr13:100308434-100312926	chr13	99656180	99660672	Ggact	chr13	100530179	100533653	yes
chr13:100313921-100314540	chr13	99661667	99662286	Ubac2	chr13	99200424	99386429	yes
chr13:100339367-100340021	chr13	99687113	99687767	Tm9sf2	chr13	99501471	99564048	yes
chr13:100374671-100378214	chr13	99722417	99725960	Tm9sf2	chr13	99501471	99564048	yes
chr13:100496949-100498078	chr13	99844695	99845824	Ggact	chr13	100530179	100533653	yes
chr13:100505385-100508431	chr13	99853131	99856177	Zic2	chr13	99981783	99986765	yes
chr13:100511724-100531853	chr13	99859470	99879599	Ggact	chr13	100530179	100533653	yes
chr13:100541974-100549247	chr13	99889720	99896993	Ggact	chr13	100530179	100533653	yes
chr13:100578194-100579303	chr13	99925940	99927049	Ggact	chr13	100530179	100533653	yes
chr13:101001828-101003958	chr13	100349574	100351704	Tm9sf2	chr13	99501471	99564048	yes
chr13:101171562-101171932	chr13	100519308	100519678	Pcca	chr13	100089019	100341950	yes
chr13:101173453-101176734	chr13	100521199	100524480	Tm9sf2	chr13	99501471	99564048	yes
chr13:101326291-101327967	chr13	100674037	100675713	Tm9sf2	chr13	99501471	99564048	yes
chr5:32100259-32101133	chr5	32100153	32101027	Zfr	chr5	32354349	32444740	yes
chr5:16812606-16813322	chr5	16812497	16813213	Myo10	chr5	16661906	16936288	yes
chr5:16794338-16795061	chr5	16794229	16794952	Myo10	chr5	16661906	16936288	yes
chr5:16791969-16793218	chr5	16791860	16793109	Myo10	chr5	16661906	16936288	yes
chr5:16538004-16540111	chr5	16537895	16540002	Myo10	chr5	16661906	16936288	yes
chr5:14445529-14446803	chr5	14445420	14446694	Otulin	chr5	14660793	14698609	yes
chr5:14439778-14441639	chr5	14439669	14441530	Otulin	chr5	14660793	14698609	yes
chr5:14264245-14265388	chr5	14264136	14265279	Otulin	chr5	14660793	14698609	yes
chr5:14248250-14251286	chr5	14248141	14251177	Otulin	chr5	14660793	14698609	yes
chr5:10624097-10625082	chr5	10623985	10624970	Dap	chr5	10679229	10761234	yes
chr8:102143439-102144058	chr8	101131211	101131830	Ubr5	chr8	102252272	102412700	yes
chr8:102167411-102168752	chr8	101155183	101156524	Ubr5	chr8	102252272	102412700	yes
chr8:102371896-102373794	chr8	101359668	101361566	Ubr5	chr8	102252272	102412700	yes
chr8:102505307-102506403	chr8	101493079	101494175	Ubr5	chr8	102252272	102412700	yes
chr8:102772078-102773178	chr8	101759850	101760950	Ubr5	chr8	102252272	102412700	yes
chr8:103136106-103136730	chr8	102123878	102124502	Ubr5	chr8	102252272	102412700	yes
chr8:103439542-103440809	chr8	102427314	102428581	Ubr5	chr8	102252272	102412700	yes
chr8:103547786-103549936	chr8	102535558	102537708	Ubr5	chr8	102252272	102412700	yes
chr8:103818359-103819674	chr8	102806131	102807446	Klf10	chr8	102648783	102653743	yes
chr8:106774988-106775650	chr8	105762760	105763422	Zfpm2	chr8	105318437	105804539	yes
chr8:108172199-108172703	chr8	107159971	107160475	Angpt1	chr8	107249481	107497918	yes
chr8:118056706-118058964	chr8	117044467	117046725	Eif3h	chr8	116642129	116755823	yes
chr8:118719740-118721448	chr8	117707501	117709209	Ext1	chr8	117794489	118111826	yes
chr8:118849980-118850434	chr8	117837741	117838195	Ext1	chr8	117794489	118111826	yes
chr8:119057756-119059612	chr8	118045517	118047373	Ext1	chr8	117794489	118111826	yes
chr8:119086011-119088439	chr8	118073772	118076200	Ext1	chr8	117794489	118111826	yes
chr8:119556597-119560749	chr8	118544358	118548510	Enpp2	chr8	119557084	119673404	yes
chr8:124528952-124529900	chr8	123516712	123517660	Atad2	chr8	123319849	123396447	yes
chr8:125333473-125334051	chr8	124321232	124321810	Tmem65	chr8	124306188	124372701	yes
chr8:125606871-125610818	chr8	124594630	124598577	Sqle	chr8	124998504	125022283	yes
chr8:125616812-125620761	chr8	124604571	124608520	Ndufb9	chr8	124539122	124549979	yes
chr8:125688545-125689325	chr8	124676304	124677084	Sqle	chr8	124998504	125022283	yes
chr8:125699033-125701157	chr8	124686792	124688916	Sqle	chr8	124998504	125022283	yes
chr8:125736050-125736704	chr8	124723809	124724463	Ndufb9	chr8	124539122	124549979	yes
chr8:125810709-125811679	chr8	124798467	124799437	Ndufb9	chr8	124539122	124549979	yes
chr8:125954547-125955799	chr8	124942305	124943557	Ndufb9	chr8	124539122	124549979	yes
chr8:126292072-126295329	chr8	125279830	125283087	Washc5	chr8	125024259	125091792	yes
chr8:126440948-126443145	chr8	125428706	125430903	Washc5	chr8	125024259	125091792	yes
chr8:131010402-131010883	chr8	129998156	129998637	Asap1	chr8	130052103	130357933	yes
chr8:131155826-131156421	chr8	130143580	130144175	Asap1	chr8	130052103	130357933	yes
chr8:133714201-133716625	chr8	132701955	132704379	Efr3a	chr8	131904092	132013642	yes
chr8:136427560-136428513	chr8	135415317	135416270	Khdrbs3	chr8	135457455	135647610	yes
chr8:138291382-138292096	chr8	137279139	137279853	Khdrbs3	chr8	135457455	135647610	yes
chr8:140055730-140056702	chr8	139043487	139044459	Peg13	chr8	140094893	140100535	yes
chr8:140441970-140446609	chr8	139429727	139434366	Peg13	chr8	140094893	140100535	yes
chr8:141930894-141932842	chr8	140920795	140922743	Slc45a4	chr8	141207168	141300518	yes
chr8:142083301-142083574	chr8	141073202	141073475	Ptk2	chr8	140657899	141001004	yes
chr8:142317936-142319030	chr8	141307837	141308931	Ptk2	chr8	140657899	141001004	yes
chr8:143856714-143858587	chr8	142775296	142777171	Them6	chr8	142727222	142736927	yes
chr8:144100118-144101081	chr8	143018701	143019664	Zfp41	chr8	143246938	143262705	yes
chr15:85167819-85168008	chr15	84624588	84624777	Zfp41	chr8	143246938	143262705	no
chr8:144392783-144394170	chr8	143310613	143312000	Zfp41	chr8	143246938	143262705	yes
chr8:144643426-144644818	chr8	143561256	143562648	Lynx1	chr8	142771196	142776531	yes
chr8:145494181-145495631	chr8	144270863	144271643	Scrt1	chr8	144330564	144335284	yes
chr8:145496912-145497574	chr8	144270193	144270862	Bop1	chr8	144262044	144291438	yes
chr22:37037882-37039775	chr22	36131598	36134334	Ift27	chr22	36758207	36769410	yes
chr22:37059718-37061519	chr22	36641835	36643728	Pvalb	chr22	36800702	36817035	yes
chr22:37063702-37064312	chr22	36663671	36665472	Pvalb	chr22	36800702	36817035	yes
chr22:37114197-37114896	chr22	36667655	36668265	Mfng	chr22	37469062	37486384	yes
chr22:37177690-37178243	chr22	36718152	36718851	Mfng	chr22	37469062	37486384	yes
chr22:37183335-37184389	chr22	36781646	36782199	Mfng	chr22	37469062	37486384	yes
chr22:37557918-37558345	chr22	36787291	36788345	Mfng	chr22	37469062	37486384	yes
chr22:37725191-37726947	chr22	37161878	37162305	Eif3d	chr22	36510854	36529166	yes
chr22:37799605-37800727	chr22	37329150	37330906	Pvalb	chr22	36800702	36817035	yes
chr22:37843946-37846557	chr22	37403565	37404688	Mfng	chr22	37469062	37486384	yes
chr22:37863415-37864151	chr22	37447909	37450520	Eif3d	chr22	36510854	36529166	yes
chr22:38576669-38578062	chr22	37782443	37782827	Ddx17	chr22	38483437	38506311	yes
chr22:39107518-39109255	chr22	38180662	38182055	Ddx17	chr22	38483437	38506311	yes
chr22:39170593-39171637	chr22	38711513	38713250	Dnal4	chr22	38778507	38794143	yes
chr22:39715051-39716102	chr22	38774588	38775632	Csnk1e	chr22	38290690	38317433	yes
chr22:39894671-39895108	chr22	39319046	39320097	Atf4	chr22	39514493	39522686	yes
chr22:39941689-39942133	chr22	39498666	39499103	Atf4	chr22	39514493	39522686	yes
chr22:40144939-40145459	chr22	39545684	39546128	Adsl	chr22	40346499	40387527	yes
chr22:40214067-40214355	chr22	39748934	39749454	Adsl	chr22	40346499	40387527	yes
chr22:40405480-40406195	chr22	39818062	39818350	Adsl	chr22	40346499	40387527	yes
chr22:40572975-40576534	chr22	40009476	40010191	Adsl	chr22	40346499	40387527	yes
chr22:40633319-40634097	chr22	40176971	40180530	Adsl	chr22	40346499	40387527	yes
chr22:41417696-41419103	chr22	40237315	40238093	Phf5a	chr22	41459716	41468692	yes
chr22:41875478-41875807	chr22	41021692	41023099	Rangap1	chr22	41244778	41302369	yes
chr22:41934638-41934930	chr22	41479474	41479803	Tob2	chr22	41433491	41445273	yes
chr22:42347389-42348476	chr22	41538634	41538926	Poldip3	chr22	42583720	42614883	yes
chr22:42362737-42363148	chr22	41951385	41952472	Cenpm	chr22	41927746	41947151	yes
chr22:42374851-42376751	chr22	41966733	41967144	Ndufa6	chr22	42085525	42090772	yes
chr22:42610589-42611804	chr22	41978847	41980747	Poldip3	chr22	42583720	42614883	yes
chr22:42665579-42666642	chr22	42214583	42215798	Cenpm	chr22	41927746	41947151	yes
chr22:42678975-42679856	chr22	42269573	42270636	Cyb5r3	chr22	42617839	42644626	yes
chr22:42727254-42728277	chr22	42282969	42283850	Poldip3	chr22	42583720	42614883	yes
chr22:42743416-42744217	chr22	42331248	42332271	Cyb5r3	chr22	42617839	42644626	yes
chr22:42760506-42761787	chr22	42347410	42348211	Cyb5r3	chr22	42617839	42644626	yes
chr22:42772196-42773250	chr22	42364500	42365781	Srebf2	chr22	41833104	41907305	yes
chr22:42784723-42785105	chr22	42376190	42377244	Poldip3	chr22	42583720	42614883	yes
chr22:42824056-42824821	chr22	42388717	42389099	Cenpm	chr22	41927746	41947151	yes
chr22:42854878-42856216	chr22	42428050	42428815	Cyb5r3	chr22	42617839	42644626	yes
chr22:42878431-42879895	chr22	42458872	42460210	Poldip3	chr22	42583720	42614883	yes
chr22:43025023-43025388	chr22	42482425	42483889	Poldip3	chr22	42583720	42614883	yes
chr22:43711347-43712696	chr22	42629017	42629382	Scube1	chr22	43197279	43343372	yes
chr22:44242571-44242914	chr22	43315341	43316690	Pnpla3	chr22	43923804	43947582	yes
chr22:44291982-44293636	chr22	43846691	43847034	Parvb	chr22	43999163	44169227	yes
chr22:44410103-44410669	chr22	43896102	43897756	Scube1	chr22	43197279	43343372	yes
chr22:44538484-44540056	chr22	44014223	44014789	Scube1	chr22	43197279	43343372	yes
chr22:44692929-44694223	chr22	44142604	44144176	Scube1	chr22	43197279	43343372	yes
chr22:45004749-45005041	chr22	44297049	44298343	Ttll12	chr22	43166621	43187134	yes
chr22:45324885-45325525	chr22	44677024	44677433	Phf21b	chr22	44881161	45008903	yes
chr22:45901013-45901414	chr22	44929005	44929645	Phf21b	chr22	44881161	45008903	yes
chr22:46145012-46149126	chr22	45505133	45505534	Phf21b	chr22	44881161	45008903	yes
chr22:46229199-46230701	chr22	45749132	45753246	Phf21b	chr22	44881161	45008903	yes
chr22:46231494-46234695	chr22	45833319	45834821	Phf21b	chr22	44881161	45008903	yes
chr22:46237364-46242329	chr22	45835614	45838815	Phf21b	chr22	44881161	45008903	yes
chr22:46244325-46244504	chr22	45841484	45846449	Phf21b	chr22	44881161	45008903	yes
chr22:46276338-46278691	chr22	45848445	45848624	Phf21b	chr22	44881161	45008903	yes
chr22:46285057-46285908	chr22	45880458	45882811	Phf21b	chr22	44881161	45008903	yes
chr22:46402303-46408387	chr22	45889177	45890028	Cerk	chr22	46684409	46736903	yes
chr22:46422992-46423997	chr22	46006423	46012507	Nup50	chr22	45163924	45188017	yes
chr22:46427135-46428730	chr22	46027112	46028117	Cerk	chr22	46684409	46736903	yes
chr22:46440461-46442097	chr22	46031255	46032850	Cerk	chr22	46684409	46736903	yes
chr22:46447228-46455555	chr22	46044581	46046217	Cerk	chr22	46684409	46736903	yes
chr22:46456217-46483635	chr22	46051348	46059675	Cerk	chr22	46684409	46736903	yes
chr22:46485301-46486215	chr22	46060337	46087755	Cerk	chr22	46684409	46736903	yes
chr22:46499776-46500949	chr22	46089421	46090335	Cerk	chr22	46684409	46736903	yes
chr22:46502036-46503254	chr22	46103896	46105069	Cerk	chr22	46684409	46736903	yes
chr22:46856770-46857746	chr22	46106156	46107374	Phf21b	chr22	44881161	45008903	yes
chr22:46895663-46896819	chr22	46460873	46461849	Phf21b	chr22	44881161	45008903	yes
chr22:47015589-47016913	chr22	46499766	46500922	Wnt7b	chr22	45920361	45972364	yes
chr22:47048585-47049538	chr22	46619692	46621016	Phf21b	chr22	44881161	45008903	yes
chr22:47136150-47137432	chr22	46652688	46653641	Phf21b	chr22	44881161	45008903	yes
chr22:47386846-47390986	chr22	46740253	46741535	Tafa5	chr22	48489552	48751932	yes
chr22:48074441-48075232	chr22	46990950	46995090	Tbc1d22a	chr22	46762630	47224975	yes
chr22:48655461-48656040	chr22	47678692	47679483	Tafa5	chr22	48489552	48751932	yes
chr22:48885300-48886192	chr22	48259649	48260228	Tbc1d22a	chr22	46762630	47224975	yes
chr22:48913281-48914844	chr22	48489488	48490380	Tbc1d22a	chr22	46762630	47224975	yes
chr22:49234029-49234416	chr22	48517469	48519032	Tbc1d22a	chr22	46762630	47224975	yes
chr22:50709892-50710321	chr22	48838217	48838604	Creld2	chr22	49918633	49927537	yes
chr22:50747571-50748378	chr22	50271463	50271892	Chkb	chr22	50578962	50582849	yes
chr22:50841804-50842280	chr22	50309142	50309949	Creld2	chr22	49918633	49927537	yes
chr12:39763492-39764123	chr22	50403375	50403851	Kif21a	chr12	39293227	39443120	no
chr12:39766417-39767801	chr12	39369690	39370321	Kif21a	chr12	39293227	39443120	yes
chr12:44678756-44679568	chr12	43857745	43857987	Nell2	chr12	44508274	44876464	yes
chr12:44739156-44741266	chr12	44284973	44285785	Nell2	chr12	44508274	44876464	yes
chr12:45811966-45813091	chr12	44775232	44777479	Arid2	chr12	45729705	45893918	yes
chr12:46288504-46288887	chr12	45418183	45419308	Arid2	chr12	45729705	45893918	yes
chr12:47969917-47971551	chr12	45894721	45895104	Col2a1	chr12	47972966	48001558	yes
chr12:48013864-48014865	chr12	47576134	47577768	Col2a1	chr12	47972966	48001558	yes
chr12:48384901-48385782	chr12	47620081	47621082	Col2a1	chr12	47972966	48001558	yes
chr12:48512765-48513542	chr12	47991118	47991999	Col2a1	chr12	47972966	48001558	yes
chr12:49204181-49205327	chr12	48118982	48119759	Tuba1b	chr12	49127781	49131395	yes
chr12:49256062-49257271	chr12	48810398	48811544	Racgap1	chr12	49989161	50017275	yes
chr12:49592662-49595551	chr12	48862279	48863488	Prph	chr12	49295143	49298698	yes
chr12:49607534-49611461	chr12	49198879	49201768	Tuba1b	chr12	49127781	49131395	yes
chr12:49621046-49629077	chr12	49213751	49217678	Tuba1b	chr12	49127781	49131395	yes
chr12:49731621-49733685	chr12	49227263	49235294	Tuba1b	chr12	49127781	49131395	yes
chr12:50198724-50199218	chr12	49337838	49339902	Rnd1	chr12	48857144	48865870	yes
chr12:50203495-50204602	chr12	49804941	49805435	Slc11a2	chr12	50952262	51028335	yes
chr12:50367211-50367997	chr12	49809712	49810819	Troap	chr12	49323254	49324388	yes
chr12:50372661-50373371	chr12	49973428	49974214	Tuba1b	chr12	49127781	49131395	yes
chr12:50413587-50416712	chr12	49978878	49979588	Prph	chr12	49295143	49298698	yes
chr12:50443794-50445436	chr12	50019804	50022929	Tuba1b	chr12	49127781	49131395	yes
chr12:50456424-50457576	chr12	50050011	50051653	Tuba1b	chr12	49127781	49131395	yes
chr12:50901683-50901910	chr12	50062641	50063793	Tuba1b	chr12	49127781	49131395	yes
chr12:50966080-50967425	chr12	50507900	50508127	Prph	chr12	49295143	49298698	yes
chr12:53012061-53012983	chr12	52006997	52007216	Eif4b	chr12	53006455	53042215	yes
chr12:53301334-53306288	chr12	52618277	52619199	Eif4b	chr12	53006455	53042215	yes
chr12:53457522-53460169	chr12	52907550	52912504	Spryd3	chr12	53064315	53079390	yes
chr12:53576456-53577323	chr12	53063738	53066385	Aaas	chr12	53307455	53321585	yes
chr12:53908155-53909913	chr12	53492390	53496173	Prr13	chr12	53441733	53446638	yes
chr12:54140679-54146508	chr12	53514371	53516129	Cbx5	chr12	54230941	54280122	yes
chr12:54524757-54524963	chr12	53746895	53752724	Cbx5	chr12	54230941	54280122	yes
chr12:54744896-54748725	chr12	54130973	54131179	Cbx5	chr12	54230941	54280122	yes
chr12:54751191-54753966	chr12	54351112	54354941	Cbx5	chr12	54230941	54280122	yes
chr12:54953290-54955050	chr12	54357407	54360182	Cbx5	chr12	54230941	54280122	yes
chr12:54958562-54961624	chr12	54559506	54561266	Cbx5	chr12	54230941	54280122	yes
chr16:4369818-4370962	chr12	54564778	54567840	Glis2	chr16	4314760	4339595	no
chr16:5064628-5065341	chr16	4319817	4320961	Rogdi	chr16	4796966	4802860	yes
chr16:5066119-5067287	chr16	5014627	5015340	Dnaja3	chr16	4425867	4456775	yes
chr16:9583284-9584777	chr16	8865014	8869438	Nubp1	chr16	10743163	10769351	yes
chr16:9798265-9798589	chr16	9489427	9490920	Nubp1	chr16	10743163	10769351	yes
chr16:11698620-11699497	chr16	9704408	9704732	Litaf	chr16	11547721	11586211	yes
chr16:11758552-11759521	chr16	11604764	11605641	Litaf	chr16	11547721	11586211	yes
chr16:12460017-12460893	chr16	11664696	11665665	Litaf	chr16	11547721	11586211	yes
chr22:22291569-22293738	chr16	12366160	12367036	Fgd4	chr12	32399522	32611283	no
chr22:19984239-19987080	chr22	21937197	21939366	Arvcf	chr22	19966726	19979685	yes
chr22:19971279-19972399	chr22	19996716	19999557	Arvcf	chr22	19966726	19979685	yes
chr22:19963102-19964492	chr22	19983756	19984876	Arvcf	chr22	19966726	19979685	yes
chr22:19856854-19857258	chr22	19975579	19976969	Arvcf	chr22	19966726	19979685	yes
chr3:183535815-183537403	chr22	19869331	19869735	Map6d1	chr3	183815883	183825602	no
chr3:184053781-184054421	chr3	183818027	183819615	Polr2h	chr3	184361709	184368591	yes
chr3:184062353-184063712	chr3	184335993	184336633	Polr2h	chr3	184361709	184368591	yes
chr3:184097044-184098609	chr3	184344565	184345924	Polr2h	chr3	184361709	184368591	yes
chr3:184353886-184355132	chr3	184379256	184380821	Polr2h	chr3	184361709	184368591	yes
chr3:184434432-184435785	chr3	184636098	184637344	Polr2h	chr3	184361709	184368591	yes
chr3:184498116-184499121	chr3	184716644	184717997	Polr2h	chr3	184361709	184368591	yes
chr3:184502612-184503981	chr3	184780328	184781333	Polr2h	chr3	184361709	184368591	yes
chr3:184742414-184743456	chr3	184784824	184786193	Igf2bp2	chr3	185643129	185821142	yes
chr3:184815333-184816824	chr3	185074691	185076412	Igf2bp2	chr3	185643129	185821142	yes
chr3:185087825-185090005	chr3	185097545	185099036	Igf2bp2	chr3	185643129	185821142	yes
chr3:185106693-185108369	chr3	185370037	185372217	Igf2bp2	chr3	185643129	185821142	yes
chr3:185389663-185391627	chr3	185416318	185422399	Igf2bp2	chr3	185643129	185821142	yes
chr3:186682668-186683544	chr3	185671875	185673839	St6gal1	chr3	186930525	187078553	yes
chr3:186694521-186695687	chr3	186964880	186965756	St6gal1	chr3	186930525	187078553	yes
chr3:186991603-186993894	chr3	186976733	186977899	St6gal1	chr3	186930525	187078553	yes
chr3:187463300-187463775	chr3	187273815	187276106	St6gal1	chr3	186930525	187078553	yes
chr3:188665037-188666334	chr3	187745512	187745987	Lpp	chr3	188152151	188890671	yes
chr3:193418530-193421442	chr3	193015379	193016773	Atp13a3	chr3	194402673	194468239	yes
chr3:193448314-193449231	chr3	193700741	193703653	Hes1	chr3	194136147	194138732	yes
chr3:193482611-193483907	chr3	193730525	193731442	Atp13a3	chr3	194402673	194468239	yes
chr3:193485209-193486330	chr3	193764822	193766118	Atp13a3	chr3	194402673	194468239	yes
chr3:194401782-194403163	chr3	193869350	193870067	Fam43a	chr3	194685882	194689037	yes
chr3:194601015-194602449	chr3	194681053	194682434	Lsg1	chr3	194640787	194660905	yes
chr3:197183094-197183843	chr3	194880286	194881720	Ncbp2	chr3	196932728	196941906	yes
chr3:197144269-197145768	chr3	197456223	197456972	Ncbp2	chr3	196932728	196941906	yes
chr3:197097254-197099571	chr3	197417398	197418897	Ncbp2	chr3	196932728	196941906	yes
chr3:196695476-196696836	chr3	197370383	197372700	Ncbp2	chr3	196932728	196941906	yes
chr3:196379638-196380667	chr3	196968605	196969965	Cep19	chr3	196706276	196712250	yes
chr3:195913425-195914379	chr3	196652767	196653796	Pigx	chr3	196712376	196736007	yes
chr3:195618892-195619791	chr3	196186554	196187508	Rnf168	chr3	196468782	196503768	yes
chr3:195615205-195617036	chr3	195892021	195892920	Pcyt1a	chr3	196234367	196287726	yes
chr3:197686851-197687527	chr3	195888334	195890165	Rpl35a	chr3	197950189	197956610	yes
chr3:124858203-124861375	chr3	197959980	197960656	Umps	chr3	124730441	124749230	yes
chr3:124848009-124849027	chr3	125139359	125142531	Umps	chr3	124730441	124749230	yes
chr3:124838534-124840075	chr3	125129165	125130183	Umps	chr3	124730441	124749230	yes
chr3:124761466-124762280	chr3	125119690	125121231	Umps	chr3	124730441	124749230	yes
chr3:124751530-124752184	chr3	125042622	125043436	Umps	chr3	124730441	124749230	yes
chr3:124722667-124728092	chr3	125032686	125033340	Heg1	chr3	124965709	125055997	yes
chr3:124400252-124402887	chr3	125003823	125009248	Umps	chr3	124730441	124749230	yes
chr3:124305202-124305845	chr3	124681405	124684040	Umps	chr3	124730441	124749230	yes
chr3:123892088-123894901	chr3	124586355	124586998	Kalrn	chr3	124033340	124519851	yes
chr3:123762310-123766674	chr3	124173241	124176054	Kalrn	chr3	124033340	124519851	yes
chr3:123751147-123753818	chr3	124043463	124047827	Kalrn	chr3	124033340	124519851	yes
chr3:123178405-123179706	chr3	124032300	124034971	Sec22a	chr3	123201942	123274136	yes
chr3:123158525-123160049	chr3	123459558	123460859	Sema5b	chr3	122909081	122993238	yes
chr3:123116607-123117461	chr3	123439678	123441202	Sec22a	chr3	123201942	123274136	yes
chr3:123077881-123078038	chr3	123397760	123398614	Slc49a4	chr3	122795057	122892157	yes
chr3:122809508-122811504	chr3	123359034	123359191	Hspbap1	chr3	122739996	122772426	yes
[truncated: 3,059 more rows]
