# Supplementary material for: Temporal analysis of enhancers during mouse cerebellar development reveals dynamic and novel regulatory functions
Source: eLife. 2022 Aug 9;11:e74207. doi: 10.7554/eLife.74207 (PMC9398453; doi:10.7554/eLife.74207)
Supplement: Supplementary file 8. — The second column indicates the group to which the gene belongs to in the SFARI gene database of ASD candidate genes. S: Syndromic gene category; 1: Category 1 (High Confidence); 2: Category 2 (Strong Candidate). [file elife-74207-supp8.xlsx]

## Sheet: Sheet1
Gene	SFARI Score
1700081L11RIK	-
CDK1	-
DNAJC2	-
ERRFI1	-
NEDD4L	-
PAX6	S
PBRM1	-
PHYHIPL	-
TAF5	-
TCF4	1
TMEM161B	-
ZMIZ1	2, S
