# Supplementary material for: Temporal analysis of enhancers during mouse cerebellar development reveals dynamic and novel regulatory functions
Source: eLife. 2022 Aug 9;11:e74207. doi: 10.7554/eLife.74207 (PMC9398453; doi:10.7554/eLife.74207)
Supplement: Supplementary file 9. [file elife-74207-supp9.xlsx]

## Sheet: Sheet1
Gene	Forward Primer	Reverse Primer
Bhlhe22	AGTCGCCTACCTCAACCAAG	GAGACGCTGTTGAATAGGGC
Dcx	TGAACTGGAAGAAGGGGAAAGC	AGGACCTGCTCGAAAGAGTG
Efnb1	TTGTGGCTATGGTCGTGC	GCTTGTCTCCAATCTTCG
Efnb2	AATGGGTCTTTGGAGGGCCTGG	CCAGCAGAACTTGCATCTTGTCCA
Tag1	GCACACACATACGCACCCTC	CTGGAGACTGAGACACACCTAGAG
Cdh2	TCGAGAGCTGATAGCCCGGT	CGTCATCACATACGTCCCAGGC
Astn2	AGCCAGATGACCCATGCCCT	TCTCCCAAAGCTGATTCCCCCTTT
Astn1	TTGATCGCTGATGGGAGCCG	TGCTCCCGCCTACCAGTTTC
eGFP	CAGAAGAACGGCATCAAGG	ACGAACTCCAGCAGGACCAT
