# Supplementary material for: Temporal analysis of enhancers during mouse cerebellar development reveals dynamic and novel regulatory functions
Source: eLife. 2022 Aug 9;11:e74207. doi: 10.7554/eLife.74207 (PMC9398453; doi:10.7554/eLife.74207)
Supplement: Supplementary file 10. — All variants associated with these traits were used as input for the ASD variant enrichment analysis conducted using GREGOR. [file elife-74207-supp10.xlsx]

## Sheet: Sheet1
GWAS Catalog ASD Associated Traits
Autism
Autism spectrum disorder, attention deficit-hyperactivity disorder, bipolar disorder, major depressive disorder, and schizophrenia (combined)
Autism and major depressive disorder (MTAG)
Autism and schizophrenia (MTAG)
Autism and educational attainment (MTAG)
Autism spectrum disorder
